# Supplementary material for: Binding of nuclear factor κB to noncanonical consensus sites reveals its multimodal role during the early inflammatory response
Source: HighWire-hosted journal article supplement (doi:10.1101/gr.210005.116), 2016-09-15
Supplement: Supplemental_Fig_S1.pdf [file Supplemental_Fig_S1.pdf]

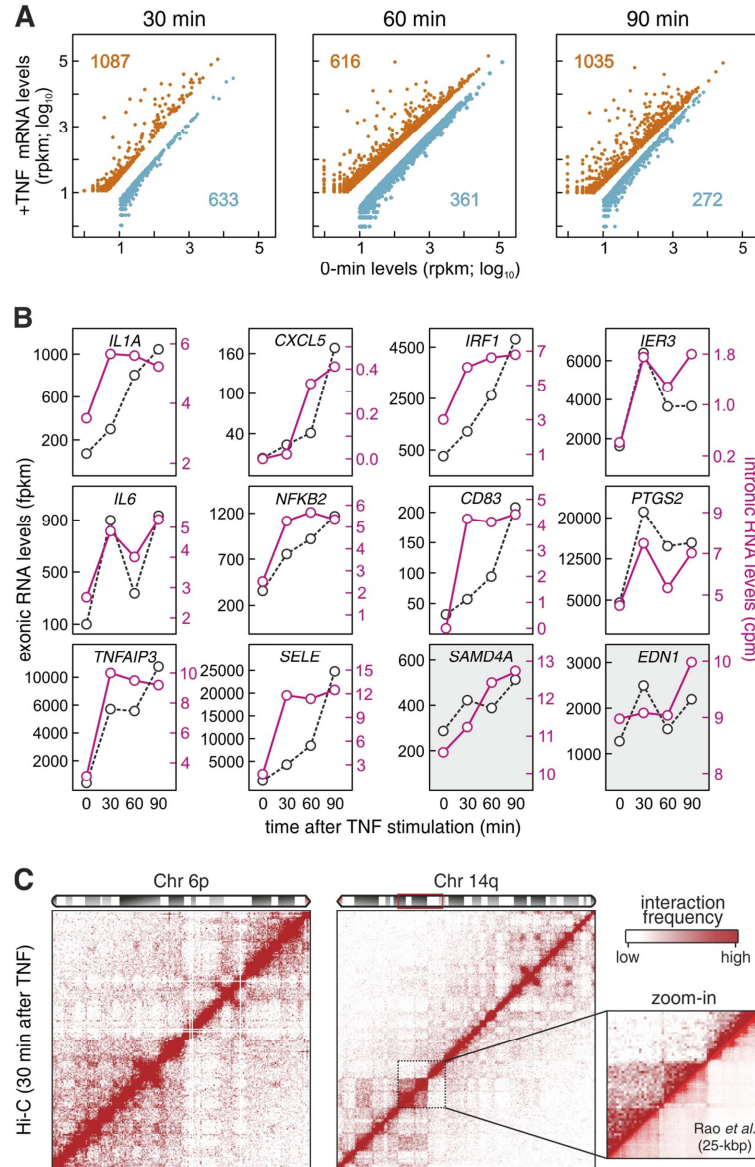

**Supplemental Fig. S1.** TNF stimulation changes gene expression in HUVECs. HUVECs were stimulated with TNF for 0-90 min, total RNA isolated, ribodepleted and sequenced, and changes in RNA levels assessed using exonic (DSeq) or intronic counts (iRNA-seq). **(A)** Log<sub>2</sub>-normalized mean counts of RefSeq exons in TNF-stimulated versus 0-min HUVECs. Only up- (orange) and downregulated (blue) genes are shown. **(B)** Changes in expression profiles assessed using exonic (dashed line) or intronic RNA levels (magenta line). *SAMD4A* and *EDN1* plots are highlighted. **(C)** Hi-C contact maps (at 100-kbp resolution) obtained using HUVECs stimulated for 30 min. Typical maps along the short arm of Chr 6 and long arm of Chr 14 (with a zoom-in of a 20-Mbp region compared to published HUVEC Hi-C at 25-kbp resolution; Rao *et al.* 2014) are shown.
