# Supplementary material for: Binding of nuclear factor κB to noncanonical consensus sites reveals its multimodal role during the early inflammatory response
Source: HighWire-hosted journal article supplement (doi:10.1101/gr.210005.116), 2016-09-15
Supplement: Supplemental_Fig_S3.pdf [file Supplemental_Fig_S3.pdf]

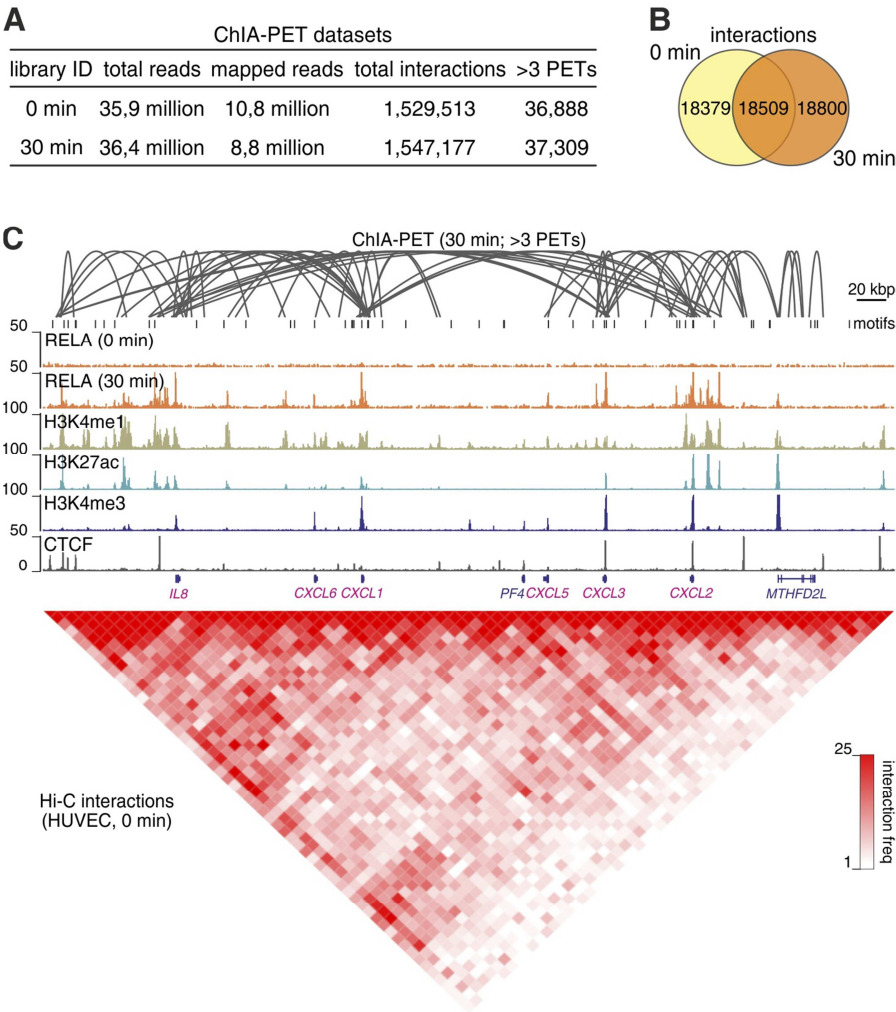

**Supplemental Fig. S3.** Features of the RNAPII–ChIA-PET data from HUVECs stimulated with TNF for 0 or 30 min. ChIA-PET was performed using antisera against active RNA polymerase II isoforms for pulling-down chromatin complexes. **(A)** Details on the total numbers of generated and successfully mapped reads after sequencing the 0- and 30-min ChIA-PET libraries (Papantonis et al. 2012). The total number of interactions detected, and those used in the analysis here (supported by  $\geq 3$  PETs) are also shown. **(B)** The Venn diagram depicts the number of unique and shared interactions between the 0- and 30-min ChIA-PET filtered datasets. **(C)** A typical view of ChIA-PET interaction maps showing the 30-min contacts that develop in a 0.5-Mbp locus carrying TNF-responsive genes. The Hi-C contact map shown below (25-kbp resolution; Rao et al. 2014) is in agreement with the ChIA-PET data.
