# Supplementary material for: Binding of nuclear factor κB to noncanonical consensus sites reveals its multimodal role during the early inflammatory response
Source: HighWire-hosted journal article supplement (doi:10.1101/gr.210005.116), 2016-09-15
Supplement: Supplemental_Fig_S5.pdf [file Supplemental_Fig_S5.pdf]

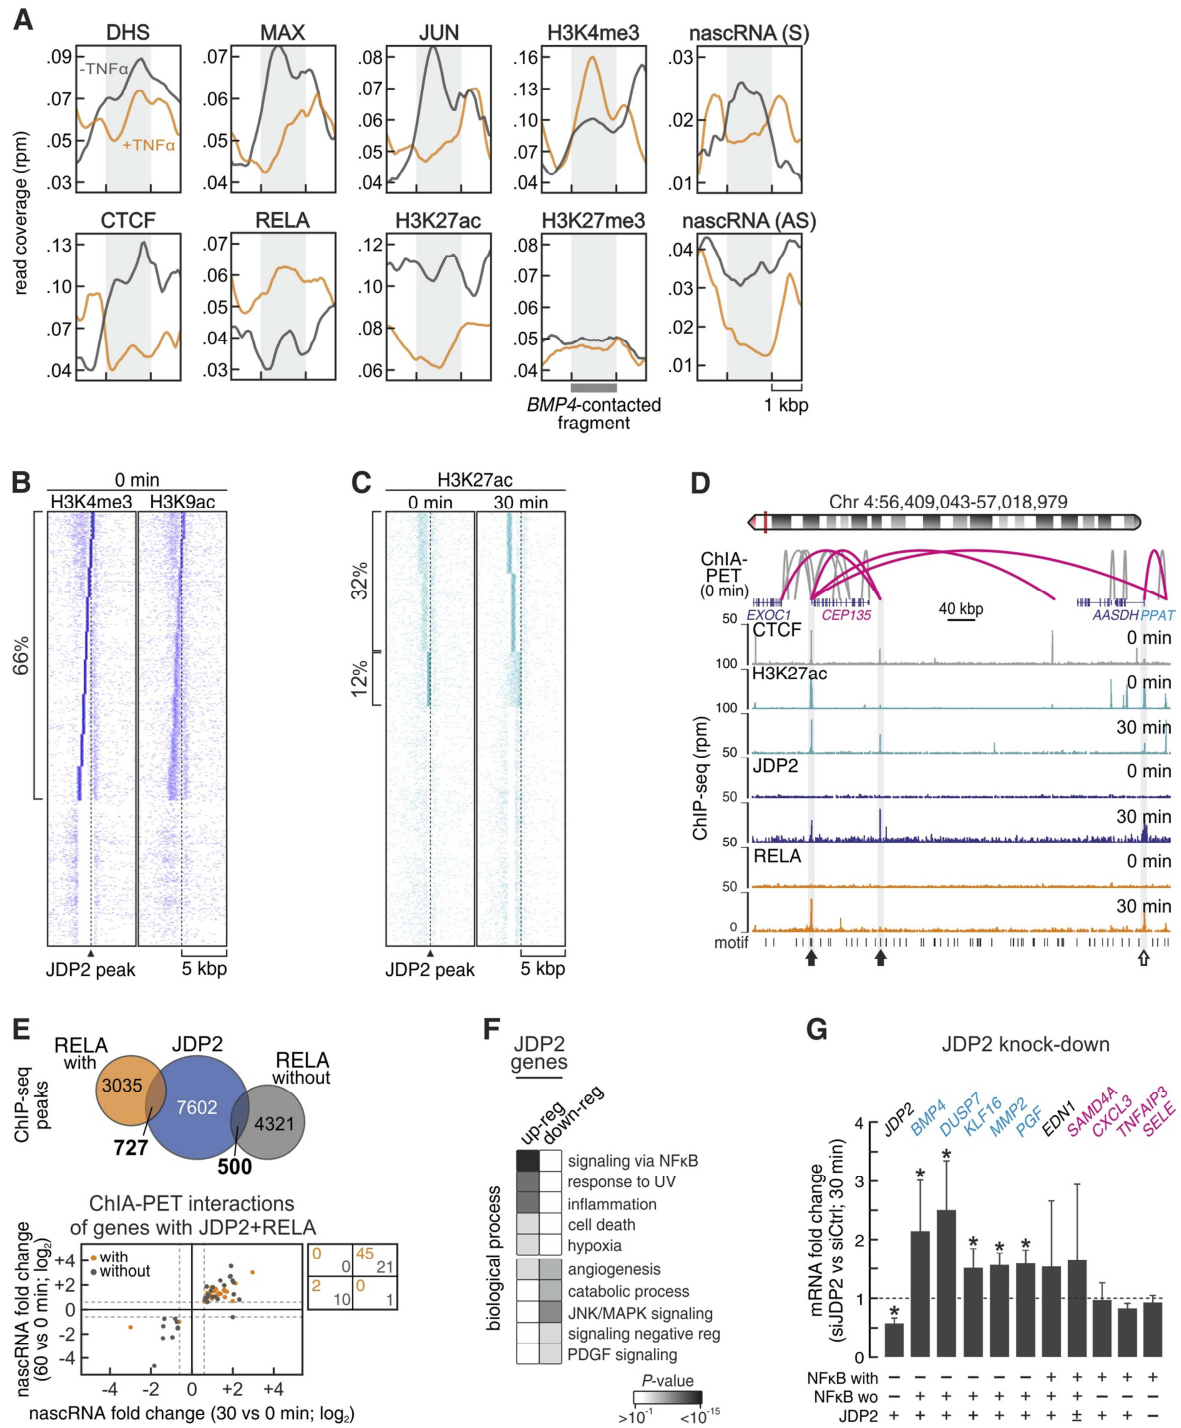

**Supplemental Fig. S5.** Regulatory properties of the JDP2 transcription factor. HUVECs were stimulated with TNF for 0 or 30 min and the function of JDP2 analyzed. **(A)** Raw read coverage (from ChIP- and nascent RNA-seq) along *Apol* fragments ( $\pm 1$  kbp) contacted by *BMP4* at 0 (grey) or 30 min (orange) post-stimulation. Only contacted fragments with  $>100$  rpm were used. Note that, with the exception of RELA, H3K27ac, and nascent RNA (sense strand – S, antisense strand – AS), all other datasets correspond to the 0-min time point. **(B)** Heat maps showing that 66% of JDP2 30-min peaks lie within  $<2$  kbp of active

gene promoters (as shown by the H3K4me3 and H3K9ac histone marks they carry; HUVEC ENCODE ChIP-seq data). **(C)** Heat maps showing that 32% and 12% of JDP2 30-min peaks lie within <2 kbp of H3K27ac-marked *cis*-elements that are further activated or suppressed at 30 min post-stimulation, respectively. **(D)** Typical profiles of JDP2 binding (*blue*) are shown alongside RELA, CTCF, and H3K27ac data in a locus harboring the TNF-induced *CEP135* (*red*) and TNF-repressed *PPAT* (*blue*) genes. ChIA-PET contacts (0 min; *on top*) bound by RELA are shown in magenta. **(E)** *Top*: Venn diagram showing the number of 30-min JDP2 ChIP-seq peaks (*blue*) that overlap RELA ones that either carry by the canonical motif (“with”; *orange*) or not (“without”; *grey*). *Bottom*: Log<sub>2</sub>-fold changes in intronic RNA levels (30- or 60- versus 0-min; only changes of at least  $\pm 0.6$  are shown) of genes bound by JDP2 and connected to RELA-bound enhancers in 30-min ChIA-PET data. Genes associated with “with” and “without” RELA peaks are shown as orange and black points, respectively, and their number in each quartile are shown (*right*). **(F)** The five most enriched GO terms for up- or down-regulated genes associated with a JDP2 peak at 30 min post-stimulation. **(G)** A ~50% knock-down of *JDP2* levels leads to increased mRNA levels of TNF-suppressed genes (*blue*), but does not significantly affect the levels of other TNF-responsive genes (*magenta*), as shown by RT-qPCR ( $\pm$ SD; n=3). \*: significantly different;  $P < 0.05$ , two-tailed Student’s unpaired *t*-test.
