# Supplementary material for: Binding of nuclear factor κB to noncanonical consensus sites reveals its multimodal role during the early inflammatory response
Source: HighWire-hosted journal article supplement (doi:10.1101/gr.210005.116), 2016-09-15
Supplement: Supplemental_Fig_S8.pdf [file Supplemental_Fig_S8.pdf]

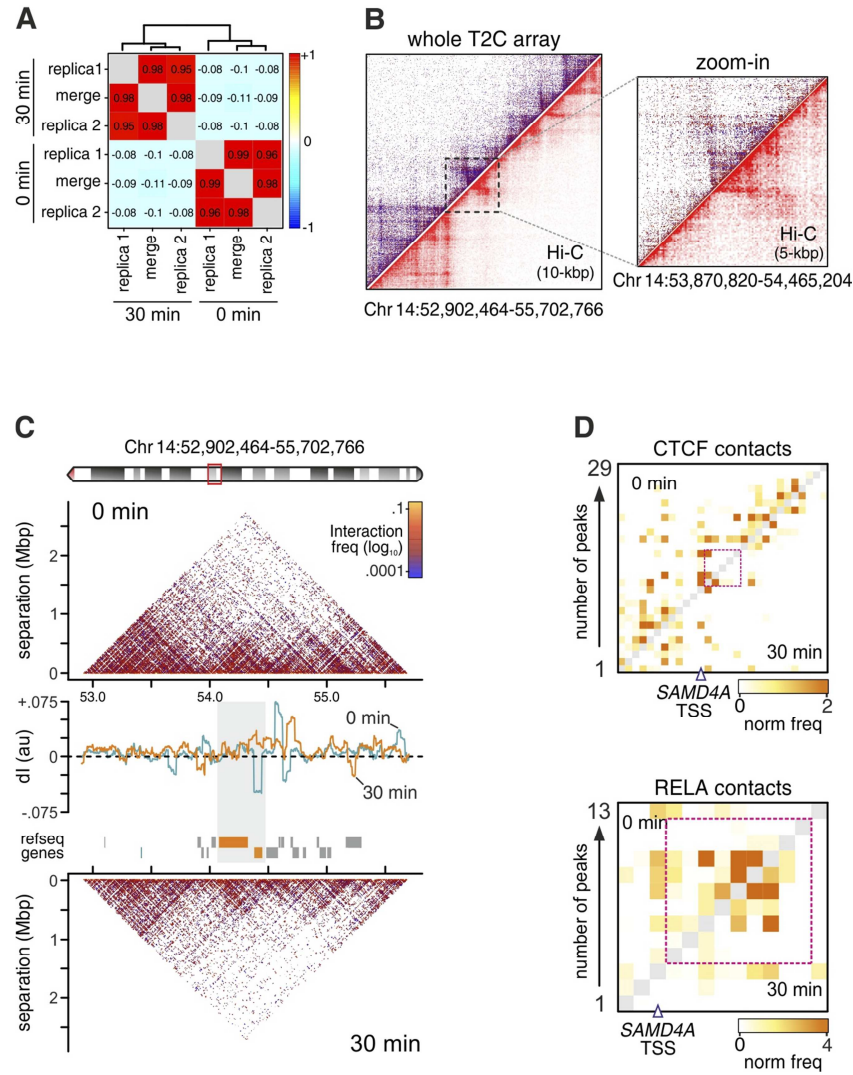

**Supplemental Fig. S8.** Spatial interactions in the *SAMD4A* locus interrogated using T2C. T2C was applied to HUVECs stimulated with TNF for 0 or 30 min. **(A)** Pairwise correlations of interaction profiles obtained using two T2C replicas at each time-point. **(B)** Contact maps illustrating interaction frequencies detected using T2C (Apol) or Hi-C (Mbol; from Rao *et al.* 2014) at 0 min. **(C)** T2C contact maps obtained in the 2.8-Mbp around *SAMD4A* (ideogram on top) using *HindIII*. The directionality index (dl) of contacts in the locus was calculated at the achieved sub-2 kbp resolution for both time-points. The up-regulated *SAMD4A* and *GCH1* genes (orange) are insulated at 0 but not at 30 min according to the dl graph. **(D)** Interactions captured by T2C between 29 CTCF-bound sites (top) or 13 RELA-bound enhancers (bottom) in the *SAMD4A* locus at 0 and 30 min. Magenta box: the intronic enhancer cluster in *SAMD4A*.
