# Supplementary material for: Binding of nuclear factor κB to noncanonical consensus sites reveals its multimodal role during the early inflammatory response
Source: HighWire-hosted journal article supplement (doi:10.1101/gr.210005.116), 2016-09-15
Supplement: Supplemental_Table_S1.xlsx [file Supplemental_Table_S1.xlsx]

## Sheet: 0_vs_30_min_TNFa_upregulated
RefSeq	Log2_FC	logCPM	Pval	Symbol	0.rep1	0.rep2	30.rep2	30.rep1
NM_000050	2.67619	2.84981	0.0715681	ASS1	0.911961	0.764675	4.36979	1.03178
NM_000070	1.26904	3.29856	0.313428	CAPN3	1.82232	2.90132	4.46261	2.13388
NM_000096	1.16128	2.49864	0.409024	CP	2.15943	1.08323	3.30251	2.2676
NM_000115	1.76796	3.32792	0.17804	EDNRB	2.79696	0.764675	4.62939	2.20229
NM_000132	1.84205	3.36296	0.161102	F8	2.09103	2.07646	4.78607	1.42435
NM_000163	1.41175	4.52291	0.147778	GHR	3.76228	3.46457	5.6979	3.7492
NM_000170	1.55812	4.42349	0.10896	GLDC	3.31459	3.50514	5.55905	3.95155
NM_000171	0.674016	4.62342	0.445813	GLRA1	4.20403	4.25703	5.25952	4.42933
NM_000187	1.46248	2.79244	0.283225	HGD	1.94366	1.61509	3.93699	1.86513
NM_000201	6.32028	7.03679	2.49887e-08	ICAM1	1.59424	1.80037	7.22977	8.52351
NM_000213	1.64291	2.80037	0.225054	ITGB4	2.25631	0.672688	3.8342	2.47539
NM_000214	1.56404	6.97998	0.0873888	JAG1	6.22897	5.71406	6.86625	8.02434
NM_000218	2.99243	4.60398	0.0106157	KCNQ1	2.70841	2.00282	6.27374	2.65698
NM_000219	2.67428	2.67384	0.0772362	KCNE1	1.06244	0.0966735	4.12292	1.3659
NM_000228	0.970981	4.69738	0.433023	LAMB3	0.553729	5.04322	5.82921	3.40186
NM_000231	1.59247	3.67879	0.166367	SGCG	3.32951	1.21951	4.61867	3.66687
NM_000236	3.82917	3.36273	0.0149691	LIPC	1.13218	-1.57916	5.06403	1.10509
NM_000273	1.05975	3.96108	0.317894	GPR143	2.58949	3.7722	4.9596	3.29627
NM_000337	3.86178	4.19285	0.00492874	SGCD	1.26229	1.08323	5.97394	1.30498
NM_000341	0.942576	3.08969	0.444562	SLC3A1	2.73106	2.18033	3.96688	2.52964
NM_000350	0.760711	5.84169	0.35809	ABCA4	5.4485	5.36314	6.18843	6.14524
NM_000351	0.72384	4.20989	0.446274	STS	4.00465	3.51842	4.79086	4.14645
NM_000358	1.69624	2.97387	0.183863	TGFBI	1.38163	2.14653	4.01671	2.70493
NM_000392	1.09211	3.95098	0.283915	ABCC2	3.70622	2.65916	4.64532	4.01949
NM_000395	0.810952	4.1072	0.414342	CSF2RB	4.0504	3.05496	3.8753	4.85824
NM_000416	0.887057	5.83175	0.390593	IFNGR1	5.78526	4.63763	3.93699	7.0531
NM_000441	0.860872	3.10926	0.498276	SLC26A4	3.23758	1.21951	3.96688	2.50277
NM_000444	0.822068	4.91351	0.344841	PHEX	4.3575	4.49719	5.69408	4.60386
NM_000447	0.733932	3.51524	0.49953	PSEN2	3.01569	3.12605	3.9795	3.60504
NM_000450	9.78156	11.3391	7.5872e-09	SELE	3.01569	1.88479	9.03843	13.2624
NM_000494	2.81099	3.55788	0.0298363	COL17A1	1.54395	1.40245	5.12777	1.94716
NM_000503	2.58878	3.07601	0.135271	EYA1	2.15943	-5.65581	4.50396	2.06206
NM_000575	3.67961	4.98617	0.000914513	IL1A	2.34709	2.04011	3.7581	6.70376
NM_000584	7.10731	7.62235	9.5605e-09	CXCL8	0.334582	2.14653	8.18701	8.93664
NM_000600	2.29048	4.52168	0.0136967	IL6	3.12235	2.75199	4.96173	5.47088
NM_000602	1.53765	8.65723	0.113465	SERPINE1	7.62019	7.76119	8.12114	9.84964
NM_000629	0.65028	5.59163	0.474425	IFNAR1	5.46549	4.94833	4.57776	6.55473
NM_000679	1.94698	2.65172	0.184678	ADRA1B	1.98194	-0.21858	3.8249	2.09842
NM_000715	1.46537	1.89105	0.374414	C4BPA	1.32319	0.0966735	2.83157	1.42435
NM_000758	5.89534	3.59094	0.000222666	CSF2	-5.65581	-0.406476	5.12777	3.29627
NM_000791	0.944356	10.21	0.442077	DHFR	10.6144	5.70248	10.8982	10.2388
NM_000834	4.11403	4.60607	0.0030091	GRIN2B	1.06244	1.61509	6.43515	1.17484
NM_000836	1.92429	3.39213	0.140677	GRIN2D	0.989162	2.65916	4.77163	2.02477
NM_000842	0.934656	5.33116	0.311166	GRM5	4.37917	5.08397	6.38702	4.3785
NM_000844	2.37458	5.54251	0.0226637	GRM7	4.46275	2.94129	7.04599	4.45058
NM_000889	2.15554	2.17094	0.17893	ITGB7	0.448313	0.672688	3.44886	1.10509
NM_000891	1.86917	5.04198	0.166258	KCNJ2	4.59829	2.07646	1.02498	6.67094
NM_000921	1.09787	11.4657	0.291063	PDE3A	11.6001	8.95877	12.0803	11.7225
NM_000922	1.31683	3.9307	0.269394	PDE3B	2.01923	3.6807	5.22637	2.16849
NM_000958	0.792564	5.76079	0.348026	PTGER4	5.67275	4.81484	5.82688	6.32857
NM_000959	1.28793	3.64279	0.271314	PTGFR	3.52365	1.56479	3.06264	4.75385
NM_000961	2.0592	3.54976	0.0877441	PTGIS	2.61407	1.34401	4.86981	2.75133
NM_000963	2.56883	8.00436	0.0819137	PTGS2	7.17403	1.92521	5.83732	9.68328
NM_001001290	1.58885	4.85782	0.103335	SLC2A9	4.17128	3.37984	6.12737	3.95155
NM_001001484	0.981754	3.00262	0.427654	PTER	2.58949	2.11192	3.79189	2.70493
NM_001001578	3.55723	3.89011	0.00825845	PDE9A	0.651965	1.51268	5.60185	1.68561
NM_001001872	1.43223	4.00339	0.171928	C14orf37	3.42984	2.61041	5.07583	3.55359
NM_001001994	2.30472	3.66666	0.0592095	GPM6B	2.31746	1.66368	5.13343	2.33008
NM_001002	0.881945	4.51182	0.359595	RPLP0	3.75124	4.17558	5.51205	3.63009
NM_001002264	1.82293	3.22262	0.162608	EPSTI1	2.6854	0.468996	4.41694	2.6324
NM_001002838	1.44166	3.22725	0.269996	WNK3	1.59424	2.70632	4.49227	1.73263
NM_001004056	0.923711	3.98907	0.367329	GRK4	3.10512	3.6807	4.88106	3.47281
NM_001004316	2.41543	3.86168	0.0453327	LEKR1	2.22473	2.04011	5.38499	2.29918
NM_001004439	0.929966	5.17618	0.296575	ITGA11	4.50936	4.72609	6.15173	4.49898
NM_001004470	1.38694	4.35265	0.17486	ST8SIA6	4.09474	2.33836	5.38973	3.99076
NM_001005376	1.30804	4.47396	0.209966	PLAUR	2.45988	4.28836	5.63281	3.61762
NM_001005474	2.64619	8.85159	0.0188592	NFKBIZ	7.59726	5.92811	7.82999	10.4156
NM_001005612	1.29287	4.93275	0.205476	EDA	3.67151	4.46328	6.22864	3.34247
NM_001006641	1.30452	5.50223	0.164083	SLC25A25	4.64675	4.76559	4.47455	6.74017
NM_001007068	1.8721	8.99253	0.0813647	SDCBP	8.1832	7.19501	7.73364	10.4384
NM_001007231	3.34106	3.52316	0.01347	ARHGAP25	0.989162	0.932727	5.16508	1.73263
NM_001007471	3.38211	5.22335	0.00474859	TRPM3	3.17287	1.92521	6.96474	3.07697
NM_001007561	2.46859	1.67204	0.150698	IRGQ	-0.0729108	-0.21858	2.22995	2.38997
NM_001007792	4.93824	3.04729	0.00336585	NTRK1	-0.239078	-3.00252	4.72243	1.48052
NM_001008213	0.839356	6.13576	0.376702	OPTN	5.95362	5.27985	5.1852	7.17087
NM_001008391	1.95976	3.65641	0.104488	CCDC73	2.95925	1.08323	4.94466	2.92332
NM_001008539	2.60517	7.28569	0.00602422	SLC7A2	5.9121	4.79316	7.91922	8.19458
NM_001008723	1.20559	3.54876	0.306045	CFAP58	2.56448	2.94129	4.72493	2.2676
NM_001008781	3.96147	4.51505	0.00354944	FAT3	1.98194	0.468996	6.31333	1.68561
NM_001009909	2.3168	4.74415	0.0357326	LUZP2	3.93807	1.15298	6.09873	4.23075
NM_001011552	1.59113	3.03767	0.241216	SLC9A4	2.63824	0.574434	4.24641	2.06206
NM_001012279	2.0082	2.15026	0.214584	SOGA3	0.448313	0.851147	3.40587	1.03178
NM_001012302	1.20139	1.67275	0.469933	ANO9	0.553729	1.00994	2.51064	1.17484
NM_001012393	4.48088	5.79559	0.00119414	OPCML	2.73106	1.45862	7.6679	2.52964
NM_001012631	2.68408	3.29077	0.0345312	IL32	1.26229	1.51268	2.79395	4.74241
NM_001012994	0.8272	4.74424	0.366067	SNX30	4.02313	4.44948	5.66572	4.06612
NM_001017975	7.19926	14.4672	0.000362004	HFM1	9.08353	6.12535	16.4525	8.24714
NM_001018020	0.74439	8.32305	0.460498	TPM1	8.10135	7.67417	6.95945	9.40487
NM_001018047	2.47545	2.51508	0.104544	MAP3K19	0.211113	1.00994	3.88874	1.42435
NM_001018053	1.51044	1.94184	0.353966	PFKFB2	1.49184	-0.21858	2.73563	1.90673
NM_001018058	0.670796	7.87106	0.478046	TFEC	7.75617	7.18047	7.11863	8.7688
NM_001018072	2.48867	5.41127	0.0340876	BTBD11	3.15622	4.03488	7.07568	2.79629
NM_001024071	1.40138	3.8136	0.177382	GCH1	3.28428	2.45341	4.15294	4.48532
NM_001024457	2.63855	2.68717	0.0828729	RGPD1	1.26229	-0.21858	4.13425	1.3659
NM_001024465	1.47484	5.96801	0.109722	SOD2	5.01304	5.08397	5.34816	7.16338
NM_001024630	2.52886	3.83549	0.0471804	RUNX2	2.37613	1.51268	5.42399	1.73263
NM_001025091	1.46261	4.50319	0.107079	ABCF1	3.25331	3.84775	4.84473	5.21765
NM_001025101	0.993717	4.95627	0.245747	MBP	4.37917	4.3416	5.72063	4.85824
NM_001029858	1.27183	4.80726	0.330464	SLC35F1	1.54395	4.86765	6.21358	1.68561
NM_001029880	2.37746	4.47965	0.0653338	SFMBT2	1.68984	3.42283	6.12168	1.42435
NM_001030287	3.02837	6.05155	0.00773154	ATF3	4.46951	2.77429	4.76679	7.70951
NM_001030312	3.31896	2.7384	0.035107	CERKL	0.743935	-0.876811	4.274	1.3659
NM_001031693	1.26321	1.64489	0.456187	HHLA3	1.32319	-0.21858	2.29871	1.637
NM_001031734	1.16475	1.63984	0.480571	FDX1L	0.651965	0.932727	2.40233	1.30498
NM_001033117	4.8369	4.63547	0.00089074	SRGAP3	1.13218	0.0966735	6.49718	1.17484
NM_001034838	3.5867	5.00583	0.0049765	KCNIP1	1.94366	2.53404	6.79841	2.06206
NM_001034845	3.53705	5.32897	0.00405605	GALNTL6	3.08767	2.00282	7.10477	2.8612
NM_001034852	3.01765	3.92793	0.0176829	SMOC1	1.7795	1.56479	5.57854	1.90673
NM_001035	5.12278	5.26289	0.000393299	RYR2	1.26229	0.851147	7.15663	1.58671
NM_001037341	0.710577	9.42799	0.477979	PDE4B	9.3332	8.64414	8.25995	10.4551
NM_001039112	2.54165	3.76708	0.0344281	FER1L6	2.25631	1.51268	5.25434	2.60739
NM_001039350	4.93261	5.74014	0.000901184	DPP6	2.37613	0.574434	7.63969	1.98649
NM_001039753	1.57489	5.09012	0.0979306	EML6	3.858	4.26492	6.36474	4.16371
NM_001039763	1.97781	3.91376	0.0968095	TMEM232	2.31746	2.75199	5.38341	2.09842
NM_001040002	4.03121	2.03811	0.0228241	MEOX1	-0.642902	-2.122	3.11696	2.38997
NM_001040032	3.21086	2.65329	0.0397806	C8orf74	0.0760793	0.231742	4.18235	1.17484
NM_001040033	1.31131	1.78272	0.42714	CD53	1.32319	0.0966735	2.66446	1.30498
NM_001040107	1.42412	3.06501	0.266024	HVCN1	1.64283	2.45341	4.22537	2.09842
NM_001040214	1.54066	5.97969	0.098859	NKAIN2	5.36768	4.51054	7.15478	5.45344
NM_001040630	3.07464	4.84049	0.0136152	NCALD	3.34428	0.764675	6.51968	2.98287
NM_001040716	0.964188	4.24766	0.352071	PC	3.58711	3.7157	5.34491	3.05863
NM_001042353	0.844507	3.32597	0.459417	FAM110A	2.4325	3.12605	3.41209	3.88026
NM_001042402	0.711565	3.82237	0.488298	NAAA	3.70622	2.99924	4.39826	3.73772
NM_001042589	2.10867	2.53452	0.155044	TMEM8B	0.448313	1.40245	3.79189	1.73263
NM_001042599	2.11703	5.54834	0.0274947	ERBB4	4.07717	4.15023	6.95732	4.68977
NM_001045	3.43306	2.29185	0.041691	SLC6A4	0.211113	-1.57916	3.68806	1.58671
NM_001048209	1.13499	7.04546	0.268713	NTM	5.67567	6.82747	8.27794	5.67724
NM_001057	1.14005	1.85276	0.485858	TACR2	0.989162	1.08323	2.70556	1.30498
NM_001058	0.728962	4.32125	0.482634	TACR1	3.54937	4.15023	5.36268	2.92332
NM_001075099	2.75238	4.04204	0.0320609	SKAP1	2.25631	1.75623	5.69663	1.53459
NM_001077197	3.52679	4.94439	0.00292522	PDE11A	2.70841	1.61509	6.67258	3.05863
NM_001077243	3.09915	3.94742	0.0154124	GRIA4	2.15943	0.764675	5.58544	2.20229
NM_001079526	1.73932	2.91166	0.194887	IKZF2	1.82232	1.56479	4.15665	1.90673
NM_001079810	1.31724	4.07554	0.302073	XIRP2	1.64283	3.95903	5.44386	1.53459
NM_001079817	0.671837	4.90555	0.495122	INSR	3.63594	5.05238	5.90614	3.65471
NM_001079843	2.9958	4.37136	0.0146187	CASZ1	1.86391	2.39703	6.05368	2.13388
NM_001079862	1.32012	4.34837	0.180316	DBI	3.74012	3.30522	3.7581	5.47779
NM_001079910	1.21703	3.49761	0.333216	LRRIQ1	1.73537	3.27426	4.72742	1.86513
NM_001080378	3.8236	4.75026	0.00325357	PACRG	2.15943	1.2831	6.54537	1.98649
NM_001080421	4.75122	3.94855	0.00148839	UNC13A	0.830393	-1.57916	5.73435	1.637
NM_001080424	1.9329	4.58005	0.0368687	KDM6B	2.6854	3.72718	5.00558	5.42509
NM_001080427	4.10658	4.59344	0.0035589	THSD7B	1.86391	0.574434	6.42134	1.17484
NM_001080439	2.35885	1.87804	0.171501	HSF5	0.743935	-1.18566	3.10165	1.10509
NM_001080448	2.222	5.25846	0.0261371	EPHA6	4.28281	2.8392	6.65826	4.52592
NM_001080452	0.82415	3.87035	0.414066	GPR108	3.20559	3.5446	3.94987	4.42933
NM_001080470	1.01307	6.94035	0.25942	ZNF697	6.49525	6.17858	6.66999	7.82317
NM_001080477	0.682918	7.07477	0.433919	TENM3	6.84334	6.51953	7.60854	7.09193
NM_001080512	3.25345	3.76933	0.0201653	BICC1	2.01923	-0.21858	5.44689	1.58671
NM_001080527	3.89742	3.63324	0.00528835	MYO7B	0.911961	0.0966735	5.33676	1.68561
NM_001080529	3.31268	3.21814	0.0242371	WIPF3	0.743935	0.574434	4.86528	1.03178
NM_001080534	4.18511	4.27547	0.00377874	UNC13C	1.54395	-0.0523592	6.08808	1.10509
NM_001080555	1.05767	2.79948	0.414334	GSG1	2.4325	1.80037	2.68516	3.59235
NM_001080850	1.77913	2.99863	0.207669	CCDC30	0.989162	2.24563	4.37298	1.17484
NM_001082534	4.45149	4.47977	0.00460762	CA10	1.7795	-1.57916	6.32079	1.03178
NM_001082575	4.79454	5.42471	0.00089566	RBFOX3	1.73537	1.34401	7.31605	1.53459
NM_001083538	1.45202	1.64023	0.403505	POTEE	1.38163	-1.18566	2.31208	1.73263
NM_001083612	1.79672	2.03044	0.268584	HYKK	0.743935	0.672688	3.20557	1.03178
NM_001083615	2.62207	4.95026	0.0194719	MYO3B	3.34428	2.75199	6.58169	3.00219
NM_001085447	1.1186	2.36028	0.463522	CCDC173	1.94366	1.08323	3.42445	1.10509
NM_001093	1.58821	3.57904	0.191018	ACACB	2.51313	2.50766	4.92087	1.94716
NM_001093729	1.11636	4.04241	0.319219	CCDC102B	2.79696	3.72718	5.25607	2.44747
NM_001093730	1.39709	2.70244	0.324926	DYTN	2.31746	0.764675	3.83882	1.68561
NM_001094	4.75529	6.4414	0.00137359	ASIC2	3.10512	1.88479	8.34775	2.52964
NM_001098175	1.80206	2.23327	0.251558	ENTPD1	1.06244	0.764675	3.4549	1.10509
NM_001098272	0.929983	7.59769	0.385283	HMGCS1	7.67744	5.95521	6.06162	8.78632
NM_001098498	3.0485	3.81705	0.0224582	SGSM1	0.989162	1.92521	5.48279	1.53459
NM_001098500	2.87911	5.47492	0.0178084	KIAA1217	2.79696	3.80506	7.20177	2.70493
NM_001098512	0.878123	7.24987	0.332706	PRKG1	7.00193	6.42402	8.06944	6.96231
NM_001098537	2.40398	3.92393	0.0596604	PNPLA7	1.68984	2.5854	5.51638	1.53459
NM_001098623	2.60838	4.02628	0.0364513	OBSCN	1.7795	2.42549	5.6368	1.90673
NM_001098672	0.965578	3.88147	0.353323	HEPHL1	3.858	2.368	4.27741	4.24703
NM_001098816	4.01494	5.77048	0.00295116	TENM4	2.79696	2.48079	7.6257	2.23531
NM_001098817	0.647862	5.52665	0.431626	INO80C	5.03596	5.27204	6.03869	5.52864
NM_001099335	1.29079	2.71644	0.325024	PHYHIP	1.98194	1.75623	3.28906	3.02125
NM_001099691	2.29553	2.91763	0.107661	TGFA	1.26229	1.21951	4.37934	1.17484
NM_001099744	1.13949	3.67119	0.349065	SYBU	3.72891	1.08323	4.72991	2.8612
NM_001099771	1.75199	2.05231	0.271964	POTEF	1.38163	-0.21858	3.03066	1.77816
NM_001099855	2.4351	2.61569	0.112623	MCF2	0.0760793	1.2831	4.041	1.17484
NM_001099952	0.714595	6.82079	0.406376	ITPR1	6.4719	6.36095	6.98835	7.26283
NM_001100117	0.827181	7.20279	0.477558	RIMS2	7.6672	3.16033	7.22094	7.82859
NM_001100163	3.18917	3.49615	0.0276161	MRVI1	1.68984	-0.0523592	5.15955	1.17484
NM_001100393	4.01578	4.45764	0.00385387	RALYL	1.13218	1.45862	6.27374	1.10509
NM_001100411	1.40058	4.01717	0.198527	FAM184A	3.62389	2.30811	5.18338	3.19918
NM_001100425	1.26716	2.38101	0.388967	KIAA0895	0.989162	1.88479	3.36156	1.73263
NM_001100873	1.0525	2.39093	0.45741	C16orf46	1.32319	2.00282	2.90397	2.58193
NM_001100874	1.76014	3.78144	0.114324	SLC9B1	2.93993	2.14653	4.99111	3.18234
NM_001101421	1.21391	2.89133	0.34432	MYO1H	2.09103	2.07646	3.8753	2.29918
NM_001102608	0.958542	3.68298	0.383417	COL6A6	3.07001	3.09095	4.67407	2.8612
NM_001103	1.63173	3.20949	0.229127	ACTN2	1.7795	2.33836	4.59426	1.03178
NM_001104558	3.64328	2.66477	0.023929	ELOVL7	-0.0729108	-0.406476	4.24641	1.03178
NM_001105243	1.10168	3.23347	0.374311	PCDH19	2.19245	2.77429	4.33092	2.09842
NM_001109763	5.38016	5.00609	0.000295369	GSG1L	1.06244	-0.21858	6.89762	1.42435
NM_001109903	1.65913	4.46049	0.103406	RNFT2	3.89859	2.53404	5.68383	3.79422
NM_001109977	1.90434	4.41292	0.0644804	FAM160A1	3.42984	2.75199	5.74054	3.57954
NM_001110514	1.6034	3.39657	0.250745	EBF4	0.553729	3.07307	4.77887	1.30498
NM_001111125	1.69058	4.27602	0.132382	IQSEC2	2.70841	3.49175	5.6864	2.52964
NM_001111283	1.2838	3.1225	0.290905	IGF1	2.79696	1.56479	3.44279	3.72615
NM_001112732	3.63962	3.8613	0.00955448	MCF2L	0.989162	1.08323	5.60864	1.03178
NM_001113523	1.08567	2.81917	0.415479	PARP15	2.56448	1.40245	3.77751	2.13388
NM_001113546	0.796627	5.39272	0.333448	LIMA1	4.9991	4.86246	5.79511	5.6591
NM_001114137	0.877874	3.31556	0.449443	DMTN	2.45988	3.01806	4.045	3.07697
NM_001115	1.93799	5.063	0.0544102	ADCY8	4.57969	1.80037	5.87383	5.53196
NM_001122670	0.753184	3.86457	0.46691	PHKA1	3.32951	3.47822	4.67924	3.32724
NM_001122679	4.44796	5.58101	0.000709475	TENM2	2.40459	1.56479	7.43117	2.81825
NM_001122742	3.97477	4.70601	0.00285837	ESR1	2.15943	0.672688	6.50738	1.98649
NM_001122834	0.868479	5.62188	0.309095	HHAT	5.10696	5.11924	6.45788	5.26239
NM_001123067	2.60684	3.83669	0.0558783	MAPT	0.743935	2.5854	5.46645	1.24138
NM_001126050	1.16049	5.467	0.169889	HDGF	4.42852	5.04322	5.50915	6.25398
NM_001126328	0.980178	3.96542	0.33465	LNX1	3.45727	3.25852	4.81218	3.63009
NM_001127231	1.65755	6.35921	0.122331	AUTS2	4.78307	5.67014	7.80184	4.59752
NM_001127323	3.93854	5.07207	0.00263387	GRM8	2.31746	1.61509	6.89429	2.02477
NM_001127391	0.969556	3.71808	0.380056	ALS2CR12	2.83928	3.33553	4.72991	2.83988
NM_001127392	1.4483	2.74143	0.287399	MYRF	1.32319	2.07646	3.84803	1.94716
NM_001127493	4.39161	4.34972	0.00229883	ANK2	1.26229	0.231742	6.17752	1.10509
NM_001127713	0.968726	5.17426	0.288003	ATL1	5.11559	3.81586	4.7048	6.11672
NM_001127717	0.769944	5.70768	0.356808	LAMA3	5.1992	5.32588	6.36394	5.60327
NM_001128165	1.20465	3.26623	0.336518	FBLN7	2.01923	2.81789	4.40763	2.09842
NM_001128303	1.19781	3.84067	0.270378	LACC1	3.74012	1.96454	3.6726	4.74814
NM_001128596	3.70682	2.53618	0.0509976	TC2N	0.553729	-5.65581	4.08838	1.10509
NM_001128620	0.886584	4.38104	0.36036	PAK1	3.37337	4.2005	5.27667	3.83788
NM_001128628	1.39661	2.99363	0.265932	PAK6	2.25631	1.84319	3.92834	2.75133
NM_001128922	1.87349	4.95666	0.0568354	LRRC32	3.48419	3.94926	3.9711	6.35698
NM_001129839	4.51202	5.8265	0.00137235	CACNA1C	2.58949	1.75623	7.71016	2.16849
NM_001130017	2.63375	2.99385	0.0605505	ART3	1.06244	1.00994	4.47157	1.637
NM_001130046	6.20084	5.15292	1.6322e-08	CCL20	-0.426907	0.231742	5.43319	6.59186
NM_001130064	2.73325	3.06946	0.0572194	GAP43	1.68984	-0.21858	4.55264	1.8223
NM_001130700	2.38492	3.5526	0.0511607	IPCEF1	2.4325	0.851147	4.89667	2.94344
NM_001134285	4.97264	4.46228	0.000828082	ESRRG	1.06244	-0.876811	6.31	1.42435
NM_001134405	1.02653	3.38477	0.369942	RUNDC3B	3.10512	2.24563	4.12292	3.28054
NM_001134418	0.760499	5.26365	0.387543	P3H2	5.38207	3.91955	5.23166	5.87619
NM_001134745	3.73571	4.41805	0.00613617	LRRTM4	1.86391	1.08323	6.21001	1.24138
NM_001135	3.63821	3.02021	0.0167088	ACAN	0.334582	-0.0523592	4.65322	1.17484
NM_001135004	0.900954	3.06315	0.449106	DNAJB5	2.45988	2.55995	3.31584	3.50024
NM_001135147	0.99787	3.57653	0.363935	SLC39A8	3.03403	2.8602	4.44755	3.1653
NM_001135186	0.874988	4.41933	0.336672	ABI3	3.64789	4.12441	4.52994	4.99469
NM_001135659	4.02703	4.93659	0.00289463	NRXN1	2.19245	1.21951	6.76661	1.68561
NM_001135774	4.45786	5.31457	0.00148943	SYN3	2.25631	1.00994	7.18325	1.77816
NM_001135958	0.769811	5.59865	0.413691	TRPC4	5.88205	3.64484	5.44538	6.29176
NM_001136052	1.30374	2.81542	0.363144	CPT1C	0.911961	2.50766	4.049	1.03178
NM_001136103	4.53228	4.51814	0.00202935	TMEM132C	1.49184	-0.21858	6.36314	1.10509
NM_001136469	1.46881	4.84232	0.149131	TMEM108	3.57464	4.16718	6.17203	3.38724
NM_001136475	1.21609	2.89965	0.355887	VASH2	2.25631	1.88479	3.99615	1.86513
NM_001136528	0.885121	3.7751	0.394334	SERPINE2	3.59947	2.75199	4.35694	3.83788
NM_001141968	1.21224	2.78713	0.365352	TPTE2	2.05557	1.88479	3.8014	2.06206
NM_001142298	1.49339	7.61348	0.133677	SQSTM1	6.84853	6.49288	6.65957	8.89785
NM_001142302	1.14175	2.1037	0.459291	CCDC113	1.73537	0.672688	3.02255	1.42435
NM_001142393	1.36213	5.23257	0.122443	NEDD9	4.92245	3.51842	5.91274	5.5583
NM_001142446	3.54432	4.88002	0.00101305	ANK1	2.4325	1.88479	6.50156	3.92143
NM_001142503	0.895408	5.17963	0.300853	STARD8	5.15382	3.88922	5.43472	5.6591
NM_001142545	0.830832	4.77756	0.396439	ADCK1	3.89859	4.58182	5.85569	3.47281
NM_001142651	1.07597	3.44506	0.363952	NEURL1B	3.48419	1.2831	4.15294	3.44485
NM_001142699	2.98906	11.856	0.0117129	DLG2	10.4827	7.82934	13.3924	11.237
NM_001142772	3.61596	5.07174	0.00549264	PCDH15	2.77533	1.61509	6.8719	2.02477
NM_001142800	0.888968	7.06061	0.330291	EYS	6.46516	6.61993	7.98015	6.54159
NM_001142807	3.27806	4.98813	0.00544508	ACOXL	2.77533	2.24563	6.71408	2.83988
NM_001142885	1.71976	2.81784	0.224638	TMOD2	1.32319	1.84319	4.14549	1.17484
NM_001143676	2.14216	4.44733	0.0268946	SGK1	2.95925	2.99924	5.6368	4.30262
NM_001143820	1.32731	9.7397	0.185564	ETS1	9.33412	8.36207	9.01615	10.9126
NM_001143830	0.692215	3.8918	0.4981	GAS2	3.57464	3.36522	4.63472	3.4589
NM_001144832	1.62569	4.02111	0.115627	TTC39A	2.53903	3.27426	5.07974	3.79422
NM_001144884	0.769493	8.03036	0.430179	SLC30A7	7.84386	7.29385	7.02331	9.04742
NM_001144952	4.98806	4.82358	0.000522248	SDK2	0.911961	0.574434	6.69635	1.3659
NM_001145044	3.34042	4.41691	0.00816556	SLCO3A1	2.34709	1.21951	6.13679	2.16849
NM_001145065	1.01636	6.19405	0.330255	CCSER1	4.61056	6.16598	7.3959	4.70753
NM_001145099	1.5555	3.73267	0.148051	SLC2A6	2.51313	2.94129	3.59271	4.77084
NM_001145153	2.00555	2.65013	0.162928	TMEM71	1.38163	1.00994	3.92834	1.68561
NM_001145248	3.11255	3.28866	0.0290252	FAM157A	1.26229	0.468996	4.90331	1.3659
NM_001145249	2.18135	3.34168	0.0921175	FAM157B	1.7795	1.80037	4.76921	1.98649
NM_001145305	1.75929	1.60391	0.310138	KIAA1683	0.911961	-0.406476	1.6896	2.50277
NM_001145312	0.99451	4.88327	0.296716	ETV3	4.71083	3.72718	3.96688	5.97726
NM_001145319	1.39096	3.20182	0.275836	PLS1	1.90434	2.55995	4.40763	1.98649
NM_001145398	1.65454	2.14082	0.279845	TEF	0.830393	1.08323	3.13211	1.77816
NM_001145443	1.00002	7.15366	0.302663	PFKFB3	5.47558	7.18256	6.74089	8.0907
NM_001145636	2.65302	3.3038	0.0449832	C1orf228	1.98194	0.231742	4.68182	2.68115
NM_001145664	1.09654	3.58952	0.355467	RFX8	2.34709	3.27426	4.74231	2.23531
NM_001145716	3.40751	3.60532	0.00577066	PNPLA1	0.553729	1.34401	5.03812	3.23227
NM_001145798	2.02438	4.73724	0.0576108	CACNB4	3.37337	3.35045	6.22776	3.09507
NM_001146319	1.1823	5.27293	0.220248	GRAMD3	5.22337	3.30522	4.69718	6.34568
NM_001154	0.801113	7.59273	0.409488	ANXA5	7.52618	6.6029	6.6989	8.59522
NM_001159484	1.57621	3.93597	0.134004	NUP210L	2.99712	2.79625	5.05809	3.47281
NM_001159575	3.46578	2.33696	0.0382971	SCNN1A	-0.426907	-0.406476	3.8342	1.03178
NM_001161334	1.43549	1.56275	0.413268	HIST2H2BF	1.06244	-0.406476	2.42711	1.17484
NM_001161354	2.56209	2.66587	0.0797298	PLEKHA4	0.0760793	1.21951	4.01671	1.86513
NM_001161574	1.12469	5.82233	0.213228	MAFF	4.22812	5.70828	5.6928	6.68893
NM_001163335	3.07172	2.59371	0.0518107	SYTL5	0.651965	-0.406476	4.09612	1.17484
NM_001163561	1.01387	3.31824	0.405236	C2orf61	2.22473	2.99924	4.36338	2.29918
NM_001164440	1.31358	5.78136	0.12315	ANKRD33B	4.47623	5.34463	6.08419	6.46708
NM_001164458	0.992714	3.55746	0.398031	ACTR3C	2.4325	3.28982	4.64268	2.36034
NM_001164595	3.99332	4.16791	0.00281288	PDZRN4	1.73537	-0.406476	5.88058	2.52964
NM_001164749	1.92627	5.9428	0.0371773	NPAS3	4.84149	4.47012	7.18824	5.56156
NM_001164758	1.32703	5.12613	0.186835	PRKAR1B	3.52365	4.79316	6.39568	3.81622
NM_001165136	0.917176	3.16795	0.4443	HERC6	2.95925	2.07646	3.9584	2.81825
NM_001166116	2.6696	3.89772	0.0272237	TMOD1	1.86391	2.04011	5.45595	2.38997
NM_001166208	0.925616	5.62995	0.269475	SYNPO	5.17875	4.99656	5.54072	6.37376
NM_001166243	0.818572	6.89361	0.371446	FHIT	6.27208	6.55861	7.81217	6.27994
NM_001166246	4.24935	5.01067	0.00220746	HPSE2	1.82232	1.45862	6.86568	1.30498
NM_001166247	4.08526	4.2563	0.00336654	GRIK2	1.59424	0.0966735	6.0447	1.58671
NM_001166254	2.45822	5.1912	0.0283764	TBXAS1	2.88039	3.87896	6.80788	3.18234
NM_001166281	1.98827	3.20352	0.127947	MUSK	2.28721	1.08323	4.52707	2.20229
NM_001166292	1.57244	2.614	0.253253	PTCH2	1.59424	1.45862	3.64117	2.20229
NM_001166373	0.748593	5.67995	0.384055	2001-03-01	5.44165	5.02474	6.47803	5.26639
NM_001166692	1.02768	2.79526	0.433232	C11orf91	1.90434	2.30811	3.63587	2.38997
NM_001167675	3.92151	4.65582	0.00364625	CADM2	2.28721	0.231742	6.44505	2.09842
NM_001167749	1.93698	3.47047	0.137041	ADCY10	1.94366	2.27721	4.92957	1.42435
NM_001167827	0.970405	3.6627	0.446477	TFEB	1.82232	3.69246	4.87657	1.48052
NM_001167880	1.2563	4.51054	0.254175	LHPP	2.61407	4.33411	5.79511	2.83988
NM_001167959	1.86535	2.44485	0.205375	TMEM178A	1.26229	0.932727	3.63054	1.68561
NM_001168235	0.888673	3.56527	0.426354	FREM3	3.49747	2.27721	4.36017	3.21582
NM_001168647	3.24566	3.0136	0.0362341	CNKSR2	1.1987	-0.876811	4.61867	1.10509
NM_001170331	0.858507	3.39553	0.455231	LANCL3	3.07001	2.61041	4.17139	3.04006
NM_001170553	1.61282	2.42854	0.266001	VSIG1	1.1987	1.40245	3.41209	2.13388
NM_001171	2.76712	3.69943	0.043962	ABCC6	1.06244	2.07646	5.34654	1.03178
NM_001171747	1.33282	4.02789	0.190454	C3orf52	3.68317	2.45341	4.30775	4.71925
NM_001172431	1.64902	3.54867	0.149594	AMPD3	2.45988	2.42549	4.71741	2.94344
NM_001172624	3.6149	3.52058	0.0137217	NEO1	1.32319	-0.406476	5.2193	1.24138
NM_001172698	1.78433	4.24853	0.140614	PPARGC1B	2.22473	3.57032	5.73435	1.86513
NM_001173498	1.47205	3.29147	0.212956	MAN2B1	1.64283	2.79625	3.98368	3.59235
NM_001178055	1.8022	2.88131	0.181919	PARP8	2.15943	0.764675	4.05299	2.2676
NM_001178074	3.33266	4.37072	0.00697026	GRIP1	2.19245	1.40245	6.07442	2.33008
NM_001178096	6.34028	7.26514	6.29936e-07	F3	2.40459	1.15298	6.54183	9.00736
NM_001184780	2.84949	3.20471	0.0498234	NOX5	1.73537	-0.21858	4.76679	1.48052
NM_001184837	0.768041	4.12919	0.435614	ADGRG2	3.91846	3.36522	4.88106	3.7831
NM_001184935	2.57269	4.57707	0.0468032	NRG2	1.49184	3.39431	6.24963	1.58671
NM_001190455	3.10153	3.20069	0.0314222	CHRNA7	1.26229	0.231742	4.79562	1.42435
NM_001190945	5.2603	6.38069	1.38239e-06	TRAF1	2.01923	2.14653	6.32244	7.93293
NM_001191058	1.49747	5.79197	0.0942023	PDE1C	4.67623	4.99656	6.9207	5.3592
NM_001193313	0.672875	6.54063	0.457133	SUGCT	5.97038	6.32741	7.37933	5.94018
NM_001193340	1.22092	4.46069	0.215564	SLC13A3	3.54937	3.82657	5.60321	3.54044
NM_001193341	1.32184	2.51853	0.360137	RSPH9	0.651965	2.18033	3.54256	1.8223
NM_001193570	1.33734	6.03684	0.1464	CSRP1	4.97083	5.42788	5.50333	7.15693
NM_001194986	4.10146	4.5925	0.00233212	TRABD2B	1.32319	1.40245	6.40973	1.53459
NM_001195001	1.85529	3.82711	0.16249	PTPRU	1.13218	3.25852	5.32032	1.30498
NM_001195037	0.868149	3.9214	0.413165	ECT2L	3.15622	3.58301	4.89889	3.04006
NM_001195278	4.44581	4.9638	0.00160988	TMEM178B	1.82232	0.851147	6.8243	1.3659
NM_001195535	2.91791	2.02738	0.0775897	LOC100505841	0.334582	-0.876811	2.54501	2.94344
NM_001195685	0.693507	5.32411	0.421852	LYPD6	5.40338	4.225	5.26641	5.91237
NM_001195831	1.08525	4.25229	0.248559	CFAP57	3.78411	3.36522	4.81922	4.51251
NM_001197238	0.79338	3.32679	0.488552	BTN2A2	2.75336	2.96087	3.13211	4.03832
NM_001198593	0.864614	3.06418	0.467579	STON1-GTF2A1L	2.58949	2.45341	3.61445	3.11295
NM_001198617	2.40098	3.79513	0.0496678	MAP7	2.56448	1.34401	5.28686	2.44747
NM_001198807	1.23017	4.99312	0.1661	MSANTD3	4.12071	4.36383	4.59972	6.02053
NM_001198954	1.19147	4.02152	0.244709	RNF103-CHMP3	3.41593	3.10861	5.01583	3.54044
NM_001199038	0.887781	3.84018	0.442847	SERINC2	2.70841	3.69246	4.97859	2.13388
NM_001199148	2.14557	1.94619	0.280674	SLC38A11	1.32319	-5.65581	3.13963	1.17484
NM_001199380	0.835238	7.67872	0.419949	RNF145	7.52618	6.78279	6.02556	8.84634
NM_001199535	1.80529	1.42944	0.31526	TGIF2-C20orf24	0.334582	-0.21858	2.28522	1.30498
NM_001199562	1.91802	4.11472	0.0522851	PLA2G6	2.93993	2.70632	5.01583	4.40777
NM_001199861	1.41093	4.30023	0.213855	KCNAB2	2.66201	3.86863	5.65265	2.38997
NM_001200	2.27978	5.17444	0.00909522	BMP2	3.49747	3.72718	5.4931	6.21105
NM_001201427	2.16235	3.63696	0.113426	DAAM2	2.92036	0.0966735	5.12966	1.8223
NM_001201457	1.36805	4.83491	0.115641	TEX14	4.23606	3.66885	5.46645	5.21765
NM_001202233	2.03916	3.91963	0.0516715	NR4A1	2.99712	1.88479	4.33092	4.79873
NM_001202439	0.932582	4.30588	0.331608	NCR3LG1	4.0504	3.39431	3.96264	5.17573
NM_001202470	0.927212	2.63722	0.488208	RPS10-NUDT3	1.7795	2.24563	3.32905	2.44747
NM_001204299	3.14739	5.38023	0.00351207	ZNF664-FAM101A	2.93993	3.16033	7.03394	3.99076
NM_001204354	2.82093	3.97426	0.031246	SPOCK3	1.54395	2.18033	5.63945	1.3659
NM_001204403	0.925375	6.45539	0.298906	ANK3	5.70458	6.09688	7.29264	6.1732
NM_001204423	4.50799	5.20138	0.00216507	RGS6	2.12564	0.764675	7.08008	1.10509
NM_001204459	1.21892	3.14333	0.350017	TNFRSF19	1.90434	2.65916	4.33747	1.637
NM_001205281	1.82643	3.72036	0.131644	PPP5D1	2.25631	2.65916	5.13531	2.02477
NM_001206	1.19421	5.15205	0.171131	KLF9	4.53534	4.31902	4.84013	6.13214
NM_001206747	0.665826	6.34724	0.487159	CAV2	6.38708	5.39946	5.33185	7.31783
NM_001206927	0.663954	5.1923	0.439916	DNAH8	4.81523	4.80404	5.96444	4.71925
NM_001207039	3.14346	3.03965	0.0176648	ETV7	0.830393	0.468996	4.26371	3.09507
NM_001220	2.68778	3.86206	0.0402272	CAMK2B	1.54395	2.18033	5.49896	1.3659
NM_001220484	0.969914	3.20591	0.418277	HEATR4	2.92036	2.14653	4.08059	2.70493
NM_001242384	2.68053	3.64436	0.0394922	SYTL3	1.54395	1.80037	5.23342	1.68561
NM_001242637	1.73222	3.78896	0.158333	IL31RA	2.09103	2.99924	5.21575	1.77816
NM_001242809	0.696071	4.81814	0.454484	ANKRD6	4.0683	4.68548	5.72439	3.99076
NM_001242863	1.27002	6.04528	0.158177	ENOX1	5.62517	4.78769	6.98783	5.87357
NM_001243093	3.07251	3.69975	0.0151611	FYB	1.38163	1.40245	5.29361	2.23531
NM_001243116	2.19787	3.04681	0.0776487	NFKBIB	1.26229	1.75623	3.39962	3.99076
NM_001243731	1.19069	2.74777	0.392236	RARG	2.05557	1.80037	3.90647	1.24138
NM_001243812	3.8231	4.28126	0.00575232	CACNA1B	1.38163	1.21951	6.07344	1.10509
NM_001243835	1.65765	3.23886	0.182275	STAT4	2.58949	1.40245	4.37298	2.70493
NM_001243985	0.7406	5.24111	0.380406	RELA	4.85186	4.78769	4.97018	5.9797
NM_001243996	1.80741	5.56884	0.0671109	RYR3	4.55451	4.18394	6.97581	4.31039
NM_001244682	2.63732	3.50245	0.0506885	POU2F3	2.34709	-0.21858	4.98695	2.36034
NM_001244764	3.70189	3.74605	0.00362734	TNIP3	1.73537	-1.18566	4.31108	4.85824
NM_001251882	1.22554	3.63095	0.316429	VIPR1	2.12564	3.30522	4.88106	1.90673
NM_001251901	4.98583	3.14739	0.000759999	CD83	-2.14116	-0.21858	3.19839	4.6227
NM_001252020	2.42679	3.99862	0.052591	TRPM1	3.12235	-0.0523592	5.39759	3.28054
NM_001252102	1.07039	3.49412	0.339898	KIF21B	3.01569	2.5854	4.35372	3.18234
NM_001252216	3.90218	4.25507	0.00779879	FAM19A1	1.98194	-0.622561	6.0437	1.30498
NM_001252226	1.05937	7.8266	0.289502	PLK2	7.58254	6.68318	6.75809	8.98143
NM_001252273	2.33146	3.1436	0.0936979	FAM69A	0.989162	1.80037	4.63206	1.3659
NM_001252390	1.54897	7.08092	0.0969443	TNIP1	5.96322	6.23796	6.70017	8.22624
NM_001252634	3.20102	4.19326	0.0150619	THRB	2.31746	0.932727	5.90283	1.73263
NM_001253728	3.97288	2.85978	0.0150264	RXFP1	0.448313	-2.122	4.47455	1.30498
NM_001254736	0.626799	6.49163	0.496797	NABP1	6.53119	5.6125	5.83732	7.33317
NM_001256111	1.67975	1.58577	0.325066	CD101	0.553729	0.0966735	2.51064	1.24138
NM_001256166	1.7251	6.7492	0.0680973	BIRC2	5.76893	5.50325	6.24354	7.99149
NM_001256295	0.916002	5.9379	0.335731	ETS2	4.83627	5.81702	4.9274	7.0215
NM_001256299	3.16234	4.04781	0.0134131	MGC57346-CRHR1	2.25631	0.672688	5.70044	2.2676
NM_001256876	0.659766	6.54509	0.446443	KANK1	6.41533	5.88777	6.58376	7.04962
NM_001257386	1.03179	4.13006	0.313648	ABCG2	3.22167	3.7157	5.1577	3.34247
NM_001257963	0.987726	3.37947	0.412394	PDLIM3	3.44362	1.56479	3.04674	4.26314
NM_001257965	1.965	3.9572	0.0988217	CRB1	3.13939	1.75623	5.39602	2.41901
NM_001258019	4.3293	4.40677	0.00331096	GRIA1	1.64283	-0.406476	6.23567	1.10509
NM_001258216	0.743738	4.03266	0.498537	IL12RB2	2.83928	4.06233	5.06403	2.68115
NM_001258275	0.70067	5.18581	0.413939	SAMD3	5.00841	4.51054	5.92366	4.83688
NM_001258282	3.66242	5.23129	0.00392033	LINGO2	2.4325	2.42549	7.03595	2.2676
NM_001258312	1.08064	5.37365	0.230302	PDE1A	5.35316	3.58301	6.03768	5.5253
NM_001258328	1.05447	3.0252	0.394205	HMHA1	2.22473	2.45341	3.84803	2.72831
NM_001258331	1.28711	4.89541	0.164977	EPB41L1	4.24396	3.91955	6.02048	4.18076
NM_001258343	1.74214	4.29447	0.0650685	SLC44A3	3.12235	3.19381	4.72493	5.05606
NM_001258419	3.49813	5.30362	0.0052946	LRRC4C	3.28428	1.51268	7.07323	2.8822
NM_001258446	0.931744	3.31887	0.473162	TOP1MT	2.01923	3.17716	4.48048	1.3659
NM_001261397	0.883671	4.6783	0.355141	P2RX4	4.12926	4.20871	3.6726	5.74761
NM_001261414	0.672013	6.23049	0.465702	SOX5	5.44165	6.16598	7.09997	5.53528
NM_001261425	1.00586	3.80305	0.348336	PPP1R1C	3.69474	2.368	4.61867	3.55359
NM_001267052	4.45871	7.22646	0.0057521	UNC45B	4.62877	0.231742	9.11073	4.04765
NM_001267550	1.36326	2.38652	0.35538	TTN	1.7795	1.00994	3.33561	1.94716
NM_001267571	0.727801	4.45543	0.43042	TBC1D2	3.61173	4.34905	5.11829	4.26314
NM_001267713	1.27144	2.99866	0.299623	IL3RA	2.4325	1.92521	3.03872	3.80526
NM_001267723	1.06457	3.06875	0.422781	CCDC61	1.59424	2.8602	4.21117	1.53459
NM_001270383	2.07495	3.35285	0.0842056	ENKUR	2.48675	1.00994	4.041	3.96146
NM_001270394	2.25213	3.81434	0.0816986	PKIB	2.25631	2.18033	5.38657	1.24138
NM_001270407	2.29999	2.78841	0.107645	JAM2	1.38163	0.764675	4.17505	1.58671
NM_001270458	1.06094	4.14014	0.293604	MAOA	3.4708	3.49175	5.13719	3.50024
NM_001270584	1.0928	4.46872	0.273263	IQCA1	3.31459	4.15023	5.5813	3.47281
NM_001270616	0.795567	4.89928	0.388799	PROX1	4.34287	4.54338	3.98785	5.9047
NM_001270943	1.2704	9.65834	0.202331	KLF7	8.95863	8.81288	8.76276	10.8539
NM_001270965	4.08936	2.43063	0.0146346	PSD	-1.5989	-0.406476	3.91526	1.58671
NM_001270974	4.05868	4.27284	0.00354269	HYDIN	0.989162	1.15298	6.07638	1.17484
NM_001271049	2.07897	3.36013	0.123846	CFAP221	2.4325	1.00994	4.81687	1.58671
NM_001271187	1.49693	4.7755	0.119982	RAP2C	4.29806	3.16033	4.19683	5.96501
NM_001271213	1.21484	3.58178	0.266846	SQRDL	2.85998	2.75199	4.4566	3.38724
NM_001271368	0.672509	4.22189	0.487244	PTGS1	4.14622	3.40864	4.8833	3.96146
NM_001271620	1.12146	5.85955	0.280981	ZNF423	4.27512	5.73127	7.12243	4.18921
NM_001271805	1.91859	2.58081	0.189001	PFKFB1	1.59424	0.672688	3.82023	1.68561
NM_001271833	1.1024	1.95543	0.478727	DENND2D	1.06244	1.34401	2.4635	2.13388
NM_001271899	4.95524	4.83268	0.00014186	PPP2R2B	1.06244	0.468996	6.65302	2.68115
NM_001271946	3.79611	5.50862	0.00297288	SLIT3	2.63824	2.53404	7.32926	2.52964
NM_001271960	0.857822	4.04302	0.395637	SLC39A1	3.84768	3.16033	3.64117	4.90003
NM_001272013	0.694282	6.32039	0.489019	ITPRIP	5.49557	6.26774	4.74478	7.41742
NM_001276349	2.21295	2.69258	0.131232	C1orf100	0.334582	1.56479	4.05696	1.48052
NM_001277083	2.05051	2.39069	0.181919	POTEJ	1.73537	-0.622561	2.38978	3.48659
NM_001277145	1.36078	6.04433	0.190975	ZBTB10	5.36044	5.04322	4.26371	7.41832
NM_001277313	2.13248	5.02566	0.0354097	FMN1	3.88855	3.16033	6.48321	3.85923
NM_001277335	1.19339	3.29005	0.327563	RASA4B	1.73537	3.01806	4.28081	2.72831
NM_001277348	2.91922	4.84522	0.0176245	C5orf66	2.4325	2.94129	6.56434	2.02477
NM_001277406	1.6356	2.07938	0.338765	POTEI	1.90434	-2.122	2.14287	2.98287
NM_001277864	0.988068	2.71155	0.467607	DHRS4L1	2.6854	0.932727	3.5197	2.33008
NM_001278065	3.48443	4.26183	0.00930516	GRM1	2.28721	0.231742	5.98962	1.98649
NM_001278267	1.10481	5.87622	0.246806	NBPF20	4.56716	5.65218	7.00234	4.94565
NM_001278530	1.72923	2.26061	0.255262	ARHGEF40	1.32319	0.672688	3.25486	1.98649
NM_001278585	2.03907	4.08529	0.0656493	CORIN	2.83928	2.50766	5.49016	2.94344
NM_001278608	0.713153	4.85	0.4035	BFSP1	4.64675	4.2005	5.04614	5.25436
NM_001281806	0.881326	2.98399	0.499231	FSD2	2.48675	2.30811	4.03295	1.58671
NM_001282157	0.739044	3.81481	0.483731	FTSJ1	2.97831	3.66885	4.60787	3.31184
NM_001282211	4.26417	2.59001	0.0102174	NDRG2	-0.897027	-0.876811	4.17871	1.17484
NM_001282227	2.23641	2.18317	0.174027	CECR1	1.06244	-0.406476	3.4906	1.03178
NM_001282357	2.55658	3.24611	0.0661522	SLC26A7	0.830393	1.75623	4.78607	1.3659
NM_001282428	2.76139	2.45399	0.0794562	KCNS3	0.553729	0.0966735	3.90647	1.03178
NM_001282445	1.13581	5.79035	0.190047	EHD1	4.37199	5.59382	6.0497	6.41579
NM_001282457	1.74554	2.49021	0.236689	C2	1.06244	1.40245	3.73348	1.30498
NM_001282540	1.23449	3.09509	0.319666	CDRT1	1.73537	2.68293	4.041	2.68115
NM_001282597	4.67976	5.36265	0.00124093	CTNNA2	2.12564	0.764675	7.2464	1.58671
NM_001282614	2.57836	2.5953	0.0866474	BEST3	0.743935	0.574434	3.99615	1.48052
NM_001282631	1.47814	2.27908	0.332375	ARSE	1.68984	0.574434	3.31584	1.637
NM_001282644	2.56468	3.81096	0.0460344	PRKCQ	2.28721	1.51268	5.40852	1.637
NM_001282658	2.51972	3.93694	0.0467168	CCDC3	1.73537	2.42549	5.5393	1.68561
NM_001282714	2.05707	3.6837	0.0668531	FAM107A	2.63824	1.75623	4.85619	3.44485
NM_001282736	3.44185	4.10119	0.00990617	PLXDC2	2.01923	0.574434	5.82105	1.77816
NM_001282762	1.7229	6.76398	0.0689268	CDV3	5.98223	5.24034	6.36474	7.97203
NM_001282935	1.0486	3.78486	0.327815	ZNF341	2.70841	3.45079	4.74231	3.21582
NM_001284348	0.781782	4.34212	0.408239	IQCH	4.32064	3.24261	4.89667	4.3785
NM_001284352	2.73569	3.69501	0.0235634	KIAA1324	2.25631	0.764675	5.08753	3.1653
NM_001284357	0.779494	6.09592	0.385992	LRRC49	6.00099	5.19146	5.78795	6.87594
NM_001286055	0.824135	7.32414	0.433736	CNN3	6.9961	6.69784	5.32527	8.53059
NM_001286057	1.4216	3.08717	0.290046	ADCY7	1.06244	2.72933	4.31772	1.73263
NM_001286237	2.67615	2.80107	0.0703341	SLC2A14	1.32319	-0.0523592	4.26371	1.48052
NM_001286401	1.30735	5.76546	0.13505	TMEM217	4.42157	5.35946	5.66832	6.69785
NM_001286446	2.94526	4.07082	0.0157854	FAM65B	2.28721	1.34401	5.67997	2.50277
NM_001286475	2.45243	2.56763	0.101964	C6orf10	1.32319	-0.21858	3.87079	1.86513
NM_001286556	0.611973	6.97272	0.497586	EVA1C	6.29126	6.91036	6.52757	7.7234
NM_001286646	0.989028	2.78958	0.475814	SLC45A4	1.59424	2.50766	3.87079	1.3659
NM_001286754	2.49178	4.12488	0.0352768	SYNPO2	2.37613	2.30811	5.69024	2.38997
NM_001286817	1.25258	6.38537	0.161599	TNFAIP8	5.15382	5.97941	6.39489	7.23861
NM_001287049	2.91685	3.62132	0.0278993	SAXO1	1.73537	1.08323	5.23342	1.73263
NM_001287053	2.86499	3.3521	0.0352948	C5orf67	0.989162	1.40245	4.9165	1.73263
NM_001287144	0.88799	4.19593	0.377807	TPD52	3.37337	3.88922	5.15028	3.4589
NM_001287212	3.04509	3.14236	0.0304138	KIF17	1.43779	-0.21858	4.62404	2.20229
NM_001287223	3.20496	2.88078	0.0342915	SCN11A	0.448313	0.355241	4.45961	1.10509
NM_001287426	2.48866	6.82124	0.0138199	UPP1	5.33108	4.81484	6.10834	8.29883
NM_001287813	1.51806	5.18485	0.120321	SNTG1	4.37199	4.03488	6.50375	3.94158
NM_001288706	2.64622	3.96817	0.016075	IL1R1	2.51313	1.40245	5.23342	3.85923
NM_001288717	4.77158	5.37436	0.000815851	CTNND2	2.05557	0.672688	7.25508	1.90673
NM_001288724	2.91947	4.39087	0.00461702	NFKB2	1.73537	2.68293	4.35048	5.73611
NM_001288973	2.71131	5.16973	0.0166508	ADAM12	3.15622	3.28982	6.83418	3.02125
NM_001289	1.56046	2.25622	0.306914	CLIC2	1.32319	0.932727	3.38704	1.30498
NM_001289021	4.20048	4.43202	0.00178831	KIF6	1.49184	0.574434	6.23128	1.8223
NM_001289059	1.25541	3.61753	0.274684	STK33	3.13939	2.368	4.72991	2.75133
NM_001289139	1.05299	2.43076	0.478136	C14orf132	1.86391	1.51268	3.4788	1.17484
NM_001289608	1.39855	3.61343	0.224734	SYTL2	2.77533	2.61041	4.78847	2.68115
NM_001289763	3.72145	2.94651	0.009805	DHRS9	0.0760793	-0.0523592	4.44148	2.20229
NM_001290039	1.86817	4.86997	0.0900394	ROBO2	4.45597	1.45862	6.16376	4.19762
NM_001290046	2.05742	4.22028	0.0716787	CECR2	3.57464	1.08323	5.53075	3.59235
NM_001290143	1.03137	5.17781	0.261609	ADGRG1	3.57464	5.13656	6.06951	4.85824
NM_001290193	0.818582	3.05022	0.494312	MYADM	2.28721	2.77429	3.28906	3.44485
NM_001290202	1.75846	3.51104	0.138639	SEZ6	2.05557	2.53404	4.77887	2.60739
NM_001290268	1.68329	3.93981	0.153833	FAM65C	1.94366	3.35045	5.32032	2.33008
NM_001290294	1.09859	5.63421	0.214433	SORBS1	5.09827	4.83089	6.65564	5.06067
NM_001291030	1.09012	3.58577	0.416793	FAM227A	1.32319	3.60806	4.86528	1.03178
NM_001291324	1.33897	4.02547	0.202427	BAHCC1	2.31746	3.70413	4.99733	3.76059
NM_001291622	2.60128	2.44575	0.0932641	KCNJ16	1.1987	-0.876811	3.61984	2.2676
NM_001291712	1.37383	3.39207	0.259567	ESR2	2.70841	2.21335	4.57499	2.33008
NM_001291867	1.44598	5.04159	0.196986	NHS	3.31459	4.63153	6.46613	2.60739
NM_001291956	3.97116	4.81742	0.00255428	CDH18	2.31746	0.672688	6.61308	2.29918
NM_001293085	0.645698	6.41006	0.488928	BPGM	6.40656	5.57805	5.59093	7.3159
NM_001297	4.40559	3.24774	0.00543528	CNGB1	0.334582	-1.57916	4.9596	1.17484
NM_001300	1.36168	6.6689	0.147324	KLF6	5.90464	5.75669	6.01742	7.83399
NM_001300787	1.19292	2.97674	0.381431	BEST1	2.92036	1.00994	1.84481	4.19762
NM_001300844	1.10595	5.3357	0.197402	FOSL1	3.98594	5.13225	5.88058	5.66214
NM_001300866	1.09288	3.73951	0.319718	FILIP1	2.79696	3.25852	4.79562	2.8822
NM_001300968	0.840929	3.56122	0.439022	CCDC181	3.15622	2.92144	4.24989	3.38724
NM_001301043	0.780472	4.57089	0.388002	CADM1	4.22812	3.97837	5.34816	4.20597
NM_001301684	1.61643	3.92805	0.168015	CCDC148	2.81827	2.88091	5.31866	2.06206
NM_001302371	0.845528	8.00091	0.352339	NBPF10	7.92285	6.94641	8.46252	8.25219
NM_001302545	1.05664	2.47732	0.444401	AAMP	1.7795	1.80037	2.98965	2.68115
NM_001302680	1.02238	2.70405	0.4694	TMIGD3	2.45988	1.34401	3.79665	1.24138
NM_001303052	4.6273	4.92691	0.00153511	MYT1L	1.64283	0.574434	6.7996	1.03178
NM_001303235	1.26691	3.81159	0.234183	ISG20	2.90051	3.16033	3.39335	4.85824
NM_001303420	2.11484	3.11456	0.117646	COLGALT2	1.73537	1.45862	4.53564	1.58671
NM_001304533	3.50178	4.61968	0.00973762	NKAIN3	2.4325	1.21951	6.4074	1.24138
NM_001304783	0.731762	4.2416	0.438439	TLDC2	3.88855	3.72718	4.77887	4.25511
NM_001305564	3.25462	7.67588	0.0115219	TXNL4A	4.87747	5.58122	9.47172	4.7652
NM_001306087	2.82225	4.13772	0.0279898	SLC35F4	2.12564	2.00282	5.81285	1.48052
NM_001306130	0.70712	9.69144	0.469765	FN1	9.78308	8.55154	9.05778	10.568
NM_001307936	1.31197	10.6267	0.257698	SLC38A2	10.4671	8.64565	8.58972	12.0097
NM_001308165	1.51438	1.76833	0.377797	SOX30	1.1987	-0.21858	2.76509	1.10509
NM_001308185	1.32875	8.42664	0.253485	CCNL1	8.33555	6.1079	6.51028	9.80342
NM_001308315	1.19843	2.54155	0.421419	TSPAN2	2.56448	-0.406476	3.35512	2.33008
NM_001308330	2.41539	4.463	0.0399857	STXBP5L	2.40459	3.03663	6.06656	2.2676
NM_001308333	2.37348	1.59347	0.184034	POPDC2	-0.239078	-0.21858	2.69539	1.17484
NM_001310135	1.27592	4.81141	0.195725	TTC6	4.78307	2.30811	5.46196	5.11047
NM_001313726	4.07702	4.17505	0.00423099	ANO3	1.64283	-0.406476	5.95808	1.53459
NM_001350	2.81693	0.99327	0.152206	DAXX	-1.20569	-1.18566	1.64804	1.53459
NM_001356	0.835811	6.93981	0.385915	DDX3X	6.75354	6.09688	5.88394	7.99872
NM_001369	1.66979	4.35317	0.120283	DNAH5	3.03403	3.43688	5.71938	2.94344
NM_001370	4.25158	4.04945	0.00345114	DNAH6	1.06244	0.0966735	5.84998	1.03178
NM_001372	3.26933	4.50363	0.00771263	DNAH9	2.37613	1.61509	6.21536	2.33008
NM_001389	4.88988	5.38156	0.000493391	DSCAM	1.7795	0.932727	7.2637	2.02477
NM_001400	1.64987	3.5656	0.145372	S1PR1	2.73106	2.24563	3.14711	4.74814
NM_001402	1.12335	6.49589	0.24868	EEF1A1	6.36009	4.97265	5.75162	7.59649
NM_001424	1.40965	2.741	0.314063	EMP2	1.54395	1.96454	3.91963	1.53459
NM_001425	1.80863	3.56766	0.0999467	EMP3	2.66201	2.00282	3.99201	4.34106
NM_001439	0.918377	6.83008	0.314528	EXTL2	6.62337	5.8775	6.41826	7.72776
NM_001497	1.45816	6.14225	0.12015	B4GALT1	4.9991	5.43839	5.57992	7.31494
NM_001503	2.64162	2.40398	0.0969096	GPLD1	0.743935	-0.0523592	3.79189	1.30498
NM_001508	1.19499	5.18361	0.173346	GPR39	4.74462	4.08034	6.13679	4.8897
NM_001510	4.30492	5.46787	0.00117865	GRID2	2.05557	2.07646	7.32226	2.33008
NM_001511	5.52527	4.59345	6.0829e-06	CXCL1	-2.14116	0.851147	5.81637	5.17573
NM_001522	3.09546	3.07066	0.0321474	GUCY2F	1.06244	0.231742	4.63738	1.48052
NM_001539	1.3308	6.70718	0.164919	DNAJA1	5.9488	5.8357	5.83732	7.91839
NM_001554	1.01319	6.39308	0.323587	CYR61	6.40656	4.7318	5.15585	7.56436
NM_001561	5.17994	1.81513	0.00968574	TNFRSF9	-3.02015	-2.122	2.92152	2.16849
NM_001563	0.65772	4.82438	0.447168	IMPG1	4.75018	4.06233	5.22637	4.97038
NM_001570	1.31475	5.83855	0.15749	IRAK2	3.72891	5.70538	6.03264	6.60456
NM_001633	1.77187	2.09366	0.26434	AMBP	0.553729	1.00994	3.25486	1.17484
NM_001635	1.04923	5.16061	0.282239	AMPH	5.32365	2.63499	5.72938	5.41432
NM_001637	3.23987	4.05441	0.0129463	AOAH	1.32319	1.84319	5.75652	1.68561
NM_001677	2.15977	5.87648	0.0178819	ATP1B1	4.75571	3.98794	5.86252	7.06003
NM_001704	3.59059	4.51475	0.00419316	ADGRB3	2.34709	0.764675	6.24005	2.55603
NM_001706	1.88422	4.81378	0.0690487	BCL6	3.4708	3.69246	3.43059	6.28389
NM_001735	1.95855	3.078	0.133792	C5	1.73537	1.66368	4.38251	2.09842
NM_001737	1.02598	3.96521	0.304183	C9	3.68317	2.90132	4.25336	4.47844
NM_001753	1.32784	9.87094	0.222326	CAV1	9.40319	8.60734	8.13343	11.2276
NM_001777	0.91053	6.04111	0.345	CD47	6.00564	4.76559	5.11258	7.10204
NM_001779	0.673505	5.43313	0.42441	CD58	5.23926	4.84149	5.19064	6.11893
NM_001781	5.7558	5.84546	5.18347e-06	CD69	1.32319	0.764675	4.37298	7.68207
NM_001794	4.06957	6.06213	0.00435769	CDH4	2.81827	2.96087	7.93605	1.94716
NM_001847	1.30087	5.56359	0.189466	COL4A6	4.30562	5.0973	6.85487	4.10238
NM_001856	2.9095	3.26282	0.0391267	COL16A1	0.911961	1.21951	4.85619	1.30498
NM_001860	1.7174	3.73783	0.108164	SLC31A2	2.70841	2.53404	3.70336	4.78206
NM_001873	2.10073	3.03415	0.127901	CPE	1.59424	1.45862	4.46859	1.30498
NM_001874	2.07539	3.69449	0.123089	CPM	0.448313	3.01806	5.18701	1.73263
NM_001914	1.01392	3.64345	0.35738	CYB5A	2.01923	3.62043	3.74338	4.29481
NM_001935	1.53127	3.45773	0.197157	DPP4	2.92036	1.7107	4.57776	2.8822
NM_001945	1.90386	6.54796	0.0370974	HBEGF	5.51201	5.05238	6.55383	7.65105
NM_001977	3.70078	3.43342	0.00823569	ENPEP	1.49184	-2.122	3.77268	4.6838
NM_002022	1.14387	2.05469	0.460643	FMO4	1.73537	0.574434	2.75533	1.94716
NM_002025	2.54808	4.49487	0.0352778	AFF2	2.51313	2.81789	6.14334	1.90673
NM_002031	2.48379	2.72959	0.0967261	FRK	1.13218	0.574434	4.19323	1.10509
NM_002032	1.26415	6.91456	0.244841	FTH1	6.87292	4.62541	5.59777	8.19196
NM_002053	1.52709	2.74964	0.253572	GBP1	2.28721	0.932727	2.75533	3.67892
NM_002116	1.35781	2.78843	0.315304	HLA-A	2.19245	1.66368	1.86309	4.01949
NM_002185	4.0768	4.27037	0.00017697	IL7R	0.830393	1.2831	5.62212	4.42218
NM_002192	1.88617	4.47991	0.0784702	INHBA	4.03228	1.34401	4.43843	5.59057
NM_002198	3.73032	5.40888	0.000269114	IRF1	2.6854	2.45341	4.85619	7.01081
NM_002207	4.00019	4.75684	0.00412965	ITGA9	1.90434	1.2831	6.59132	1.03178
NM_002208	1.13179	4.11293	0.291053	ITGAE	3.26888	3.51842	5.29193	2.79629
NM_002210	1.06215	9.09739	0.303232	ITGAV	8.82287	8.00405	7.78786	10.3
NM_002238	4.08842	4.57732	0.00305331	KCNH1	1.7795	0.764675	6.39803	1.3659
NM_002240	3.15765	4.85538	0.00717305	KCNJ6	2.81827	2.11192	6.55945	2.79629
NM_002249	2.78869	4.40405	0.0183755	KCNN3	2.28721	2.45341	6.0447	2.41901
NM_002285	3.40327	5.91995	0.0006901	AFF3	2.85998	3.74986	7.39512	5.6591
NM_002305	0.70757	5.61568	0.397488	LGALS1	4.76123	5.55891	5.68254	6.12775
NM_002317	1.49464	4.87765	0.104479	LOX	4.17128	3.66885	4.41385	6.02997
NM_002318	0.723995	7.45774	0.421052	LOXL2	6.50842	7.44226	7.50432	8.00053
NM_002332	2.80204	4.01827	0.0362365	LRP1	0.911961	2.55995	5.68254	1.42435
NM_002338	4.48781	4.76699	0.00124854	LSAMP	1.26229	1.08323	6.61712	1.42435
NM_002356	0.670994	4.76205	0.465932	MARCKS	4.29806	4.47012	3.91526	5.68921
NM_002419	0.707615	4.36221	0.48087	MAP3K11	3.57464	4.27278	3.28228	5.3704
NM_002425	3.01014	3.98706	0.00497152	MMP10	2.15943	1.2831	4.54133	5.00909
NM_002467	0.645708	4.63611	0.484614	MYC	3.67151	4.6972	4.16404	5.41432
NM_002546	1.74712	2.18028	0.251384	TNFRSF11B	0.989162	1.00994	2.42711	3.00219
NM_002562	1.99373	2.94946	0.150299	P2RX7	1.68984	1.34401	4.34073	1.3659
NM_002575	7.01486	6.24933	1.96851e-06	SERPINB2	0.651965	-0.406476	8.14187	3.98106
NM_002581	1.28832	5.21841	0.143195	PAPPA	4.69364	4.08034	6.21625	4.9103
NM_002599	2.00563	4.56874	0.0769557	PDE2A	2.58949	3.63268	6.08614	2.55603
NM_002616	1.28181	2.87597	0.311233	PER1	1.59424	2.39703	3.34864	3.31184
NM_002640	1.49585	5.67355	0.0835337	SERPINB8	5.0405	4.34905	5.71057	6.61401
NM_002661	1.03667	4.91753	0.267195	PLCG2	4.01392	4.51717	5.99274	4.02893
NM_002687	0.620543	4.78934	0.498833	PNN	4.66451	4.18394	4.03295	5.66214
NM_002698	1.48195	3.36487	0.226803	POU2F2	2.28721	2.45341	4.58603	2.2676
NM_002705	1.5918	3.03018	0.225548	PPL	1.49184	2.27721	4.274	1.86513
NM_002727	1.49783	5.16235	0.0770767	SRGN	4.05938	4.36383	5.42553	5.96008
NM_002748	0.703279	6.25613	0.44339	MAPK6	5.71598	5.99373	5.49163	7.17407
NM_002753	2.18489	4.55799	0.030726	MAPK10	3.28428	2.77429	5.94205	3.7831
NM_002818	1.48302	2.18063	0.324332	PSME2	1.06244	1.34401	2.22995	3.04006
NM_002847	4.7929	6.52737	0.00131969	PTPRN2	2.88039	2.42549	8.44005	2.36034
NM_002849	1.56477	4.80896	0.112289	PTPRR	4.5159	2.33836	5.76018	4.82608
NM_002850	1.44684	4.85316	0.132285	PTPRS	3.65975	4.15873	6.08225	3.93154
NM_002908	1.66871	5.8066	0.0925401	REL	5.07189	4.31902	4.58603	7.19415
NM_002930	3.51099	3.77109	0.0151705	RIT2	1.90434	-1.18566	5.44538	1.94716
NM_002970	1.45015	6.67909	0.117213	SAT1	6.36009	4.77668	7.17138	7.27777
NM_002982	3.22038	2.58487	0.0441252	CCL2	-0.897027	0.851147	1.49236	4.23891
NM_002987	6.81238	2.04098	0.00219757	CCL17	-5.65581	-3.00252	3.54822	1.17484
NM_002996	3.55221	1.57021	0.058895	CX3CL1	-2.14116	-0.622561	2.06606	2.55603
NM_002999	4.33281	8.09956	8.62284e-05	SDC4	4.86728	4.50388	7.72179	9.70389
NM_003026	2.68675	3.62675	0.0395666	SH3GL2	1.49184	1.80037	5.2104	1.73263
NM_003049	0.783678	3.81582	0.442623	SLC10A1	3.31459	3.39431	3.92399	4.32581
NM_003054	1.02322	3.52503	0.346047	SLC18A2	3.07001	2.68293	4.14549	3.63009
NM_003090	1.10714	5.23208	0.214478	SNRPA1	4.78848	4.31902	4.67407	6.26802
NM_003105	4.22527	3.93163	0.00255051	SORL1	0.743935	0.355241	5.70425	1.42435
NM_003149	1.45944	4.21951	0.173517	STAC	4.00465	1.75623	5.2474	3.94158
NM_003152	1.35942	3.74591	0.191149	STAT5A	2.79696	2.98018	4.00852	4.4576
NM_003215	3.18157	3.42565	0.025315	TEC	0.911961	1.08323	5.08364	1.10509
NM_003238	0.822788	7.39059	0.435802	TGFB2	7.20166	6.57458	5.42091	8.59323
NM_003253	4.56377	4.83683	0.00104629	TIAM1	1.38163	0.932727	6.69124	1.53459
NM_003285	2.26674	5.55431	0.0832682	TNR	2.92036	4.60066	7.22801	1.637
NM_003295	0.93339	4.62632	0.338828	TPT1	4.37199	3.72718	3.57619	5.72743
NM_003323	2.7196	2.08228	0.0912846	TULP2	0.0760793	-0.0523592	3.23394	1.90673
NM_003380	1.07054	8.52513	0.282325	VIM	8.34568	7.22871	7.72022	9.62099
NM_003385	1.89517	3.72722	0.102077	VSNL1	2.45988	2.39703	5.07583	2.6324
NM_003407	3.63536	4.16354	0.00236463	ZFP36	2.12564	-0.0523592	3.86626	5.68623
NM_003485	1.59171	2.44557	0.276481	GPR68	0.448313	1.88479	3.43059	2.13388
NM_003558	2.45639	4.37743	0.0287039	PIP5K1B	2.90051	2.30811	5.92149	2.8822
NM_003564	1.01352	5.23937	0.236326	TAGLN2	4.70512	4.57548	4.97018	6.11893
NM_003573	1.29006	3.45669	0.312326	LTBP4	1.38163	3.25852	4.70226	1.86513
NM_003612	2.75287	2.58959	0.0646801	SEMA7A	-0.239078	1.00994	3.90206	2.06206
NM_003619	1.40005	2.9445	0.288858	PRSS12	2.75336	0.468996	3.6726	3.11295
NM_003621	0.954598	4.67988	0.355879	PPFIBP2	4.86216	2.39703	5.65789	4.0004
NM_003625	3.3081	4.08021	0.0104932	PPFIA2	2.22473	0.355241	5.73807	2.41901
NM_003670	2.17187	4.19722	0.0534158	BHLHE40	3.32951	1.7107	3.31584	5.64688
NM_003679	1.17347	2.58619	0.400636	KMO	1.90434	1.66368	3.57064	1.86513
NM_003713	0.669712	7.07007	0.447442	PPAP2B	6.75768	6.63066	6.87133	7.73282
NM_003716	1.42708	5.58436	0.166304	CADPS	4.15462	5.07051	6.95199	3.83788
NM_003719	2.89062	4.06615	0.0192835	PDE8B	2.09103	1.75623	5.70171	2.13388
NM_003722	3.96894	3.95784	0.00205622	TP63	1.26229	0.231742	5.62614	2.6324
NM_003742	2.03401	4.15925	0.0497558	ABCB11	3.41593	1.66368	4.64268	4.98502
NM_003764	1.85437	4.38535	0.0585506	STX11	2.56448	3.59559	4.36017	5.47779
NM_003786	2.14697	3.43633	0.0937556	ABCC3	1.7795	2.04011	4.89445	1.8223
NM_003821	4.0309	8.79405	0.00284371	RIPK2	6.25264	4.70883	6.22864	10.6427
NM_003835	3.04907	3.86438	0.0222732	RGS9	1.59424	1.56479	5.5478	1.30498
NM_003855	3.29214	6.47743	0.00101599	IL18R1	4.53534	3.28982	6.6097	7.815
NM_003862	2.37503	3.03839	0.0889807	FGF18	1.26229	1.34401	4.50978	1.42435
NM_003878	1.91534	5.68083	0.103555	GGH	5.11559	3.07307	3.28228	7.25581
NM_003897	1.30691	1.33299	0.465134	IER3	0.553729	0.231742	1.80754	1.58671
NM_003937	2.11795	4.16154	0.0439963	KYNU	3.3589	1.51268	5.14094	4.42933
NM_003948	1.38195	1.94774	0.385263	CDKL2	1.1987	0.672688	2.88621	1.42435
NM_003966	3.98024	4.35566	0.00395989	SEMA5A	1.98194	-0.406476	6.12358	2.06206
NM_003979	0.986157	3.25736	0.406486	GPRC5A	2.4325	2.79625	4.16772	2.68115
NM_003994	1.47906	8.53196	0.204645	KITLG	8.1873	6.63676	6.2531	9.98551
NM_003998	2.69094	9.64046	0.0134072	NFKB1	8.09044	7.28125	8.69184	11.199
NM_004048	1.40854	3.98274	0.241631	B2M	3.74012	2.00282	2.12783	5.38519
NM_004061	2.20007	5.62768	0.0303474	CDH12	4.3502	3.85823	7.12952	4.33346
NM_004079	2.40543	2.59344	0.0865818	CTSS	0.448313	1.21951	3.08617	3.4589
NM_004080	3.23375	4.71172	0.003555	DGKB	2.63824	1.84319	6.33722	3.48659
NM_004090	1.12205	4.43554	0.2538	DUSP3	3.80561	3.72718	3.57064	5.56806
NM_004091	1.76988	1.9127	0.284697	E2F2	0.448313	0.764675	2.98131	1.30498
NM_004113	1.63388	5.15106	0.0901738	FGF12	4.05938	4.12441	6.47358	4.07527
NM_004148	0.945655	4.47628	0.336868	NINJ1	2.45988	4.62541	4.70226	5.0043
NM_004180	0.930026	9.77936	0.39754	TANK	9.32554	9.1508	7.57878	11.046
NM_004274	2.96392	4.93521	0.0114592	AKAP6	2.92036	2.5854	6.63452	2.65698
NM_004297	0.816225	4.58435	0.402174	GNA14	3.67151	4.42149	5.59777	3.54044
NM_004304	3.16346	5.74339	0.00909979	ALK	3.23758	3.55752	7.50395	3.04006
NM_004320	1.87529	2.466	0.21435	ATP2A1	1.13218	1.08323	3.77268	1.03178
NM_004334	0.761594	3.88959	0.464089	BST1	4.02313	2.45341	4.06093	4.33346
NM_004414	1.95597	6.13434	0.0315987	RCAN1	4.42852	5.16638	6.33231	7.15262
NM_004417	2.09823	4.85562	0.0284491	DUSP1	3.67151	3.19381	4.33747	6.20063
NM_004419	2.40467	6.1522	0.0168331	DUSP5	4.77764	4.15023	5.4286	7.61621
NM_004420	1.73316	5.03168	0.0496909	DUSP8	3.89859	3.92952	4.92305	6.12775
NM_004464	4.17347	6.35547	0.00258072	FGF5	4.00465	0.231742	4.84933	8.1384
NM_004519	4.70077	4.63526	0.00125117	KCNQ3	1.38163	-0.0523592	6.49058	1.24138
NM_004540	0.801587	4.76515	0.364401	NCAM2	4.44231	4.12441	5.53787	4.44353
NM_004556	2.18926	4.30105	0.02226	NFKBIE	2.70841	2.90132	4.82389	5.14998
NM_004562	2.215	6.24461	0.0359446	PARK2	5.0314	4.36383	7.76496	4.89488
NM_004570	3.31612	4.15028	0.018708	PIK3C2G	0.448313	2.27721	5.89619	1.03178
NM_004686	1.07341	5.0866	0.208628	MTMR7	4.83104	3.90951	5.49603	5.53528
NM_004717	0.833019	5.97893	0.347176	DGKI	5.12844	5.78717	6.82896	5.55176
NM_004728	0.671556	5.41617	0.415605	DDX21	4.85702	5.1956	5.53075	5.86568
NM_004737	2.41821	5.61247	0.0292134	LARGE	3.58711	4.2005	7.23636	3.52716
NM_004746	1.78025	6.35047	0.0559769	DLGAP1	4.89763	5.43839	7.52563	6.06484
NM_004770	3.72959	4.19176	0.00582705	KCNB2	1.86391	0.355241	5.94527	1.73263
NM_004784	0.877655	4.09786	0.393729	NDST3	4.02313	2.88091	4.99111	3.52716
NM_004822	4.01071	4.35987	0.00415528	NTN1	1.32319	1.08323	6.17112	1.03178
NM_004885	2.20066	2.33726	0.166787	NPFFR2	1.1987	-0.0523592	3.65697	1.17484
NM_004923	0.997669	3.09808	0.415382	MTL5	2.77533	2.04011	3.9753	2.60739
NM_004946	1.60615	6.22637	0.106676	DOCK2	5.158	5.24034	7.56698	5.08805
NM_004947	2.49374	5.23171	0.0262183	DOCK3	3.40188	3.5446	6.86964	3.02125
NM_004950	1.51712	1.35137	0.40675	EPYC	0.743935	-0.622561	2.18707	1.03178
NM_005021	3.8626	2.67851	0.0164627	ENPP3	-0.239078	-0.622561	4.27058	1.10509
NM_005040	0.806567	7.8832	0.465898	PRCP	7.83344	6.85258	5.5478	9.11469
NM_005045	1.91026	4.94737	0.0725681	RELN	2.99712	4.12441	6.41206	3.35755
NM_005068	1.36032	3.31809	0.274168	SIM1	2.61407	2.18033	4.51556	2.13388
NM_005092	1.33743	6.48523	0.154317	TNFSF18	5.5634	5.76228	5.82455	7.64415
NM_005099	1.08951	3.09672	0.394665	ADAMTS4	1.06244	3.07307	3.94987	2.77398
NM_005110	1.48708	4.64254	0.0996259	GFPT2	3.15622	4.09813	5.04414	5.32126
NM_005118	1.05275	6.76643	0.298761	TNFSF15	4.21211	6.93903	7.49152	6.81989
NM_005146	0.928448	3.22747	0.454239	SART1	2.15943	2.98018	4.23593	2.20229
NM_005160	1.13607	4.03378	0.261412	ADRBK2	3.52365	3.09095	4.9596	3.67892
NM_005178	2.1631	4.36184	0.0227143	BCL3	2.75336	3.01806	4.84243	5.23816
NM_005187	3.73481	3.28084	0.0109554	CBFA2T3	0.743935	-0.21858	4.94252	1.42435
NM_005204	1.87036	4.1942	0.0880755	MAP3K8	3.26888	2.61041	3.00619	5.63146
NM_005211	2.22112	3.35512	0.0953245	CSF1R	1.86391	1.66368	4.83782	1.58671
NM_005215	3.72675	5.15643	0.00314819	DCC	2.79696	1.51268	6.94558	2.6324
NM_005245	0.758218	4.59367	0.408933	FAT1	4.70512	3.24261	4.99318	4.82065
NM_005253	1.5055	7.30339	0.130442	FOSL2	6.55677	6.13831	6.29409	8.60315
NM_005257	1.17903	6.25402	0.217759	GATA6	5.70458	5.37048	5.31866	7.42549
NM_005261	3.39769	2.58864	0.0204921	GEM	0.334582	-0.406476	3.10165	3.64245
NM_005270	1.63544	4.83975	0.197315	GLI2	1.73537	4.58182	6.33559	1.94716
NM_005277	5.16395	3.40029	0.00121636	GPM6A	-0.642902	-1.18566	5.16692	1.03178
NM_005418	0.930032	5.57779	0.262131	ST5	5.0405	5.02008	6.23304	5.62212
NM_005422	1.0186	3.73265	0.359959	TECTA	3.22167	2.94129	4.80511	2.68115
NM_005458	1.04396	6.62245	0.381453	GABBR2	4.3355	6.75222	7.95108	4.02893
NM_005486	1.55598	2.42249	0.29438	TOM1L1	1.68984	0.851147	3.49647	1.77816
NM_005534	1.23503	5.59987	0.150161	IFNGR2	4.17128	5.30688	5.92475	6.2255
NM_005542	2.08816	8.25451	0.07381	INSIG1	7.64053	5.04781	7.04449	9.74334
NM_005562	1.92733	3.94177	0.0669172	LAMC2	1.98194	3.09095	4.94466	4.04765
NM_005576	1.24894	2.69499	0.377954	LOXL1	1.73537	1.92521	3.88874	1.03178
NM_005620	0.787583	4.77097	0.393196	S100A11	4.85702	3.45079	4.50978	5.52864
NM_005630	2.54102	4.00202	0.0498539	SLCO2A1	2.28721	2.04011	5.63813	1.24138
NM_005640	1.08413	4.23639	0.288273	TAF4B	2.79696	4.06233	5.23166	3.64245
NM_005645	0.810785	4.31507	0.400987	TAF13	3.65975	4.01629	3.81085	5.19264
NM_005655	1.96378	4.23205	0.0640915	KLF10	3.31459	2.42549	3.49647	5.60011
NM_005708	4.25196	5.14326	0.000767206	GPC6	2.19245	1.21951	6.95253	2.83988
NM_005715	1.50087	5.01963	0.129459	UST	3.78411	4.28836	6.34212	3.70273
NM_005746	1.35071	8.21257	0.161172	NAMPT	7.44116	7.32534	7.61664	9.35761
NM_005755	5.35891	0.699334	0.0323597	EBI3	-3.02015	-5.65581	1.60525	1.03178
NM_005761	1.86341	4.12779	0.114375	PLXNC1	2.31746	3.25852	5.59777	2.13388
NM_005876	4.27034	2.72129	0.00961234	SPEG	-0.897027	-0.622561	4.33747	1.17484
NM_005953	3.86377	4.69969	6.42106e-05	MT2A	1.49184	1.92521	5.50915	5.65606
NM_006006	1.39962	5.38459	0.139548	ZBTB16	4.82579	4.08927	6.61241	4.44353
NM_006011	2.59137	2.95668	0.0645682	ST8SIA2	1.1987	0.851147	4.40763	1.73263
NM_006073	4.37018	3.90798	0.00303565	TRDN	0.830393	-0.21858	5.70171	1.03178
NM_006089	1.94769	2.73155	0.176067	SCML2	1.1987	1.45862	4.07668	1.30498
NM_006108	1.60978	5.38376	0.0928425	SPON1	4.26739	4.42149	6.70017	4.32581
NM_006133	0.930894	4.13057	0.349129	DAGLA	3.32951	3.76107	5.0199	3.64245
NM_006157	4.49711	5.16583	0.00162663	NELL1	2.15943	0.574434	7.03243	1.637
NM_006169	2.46602	8.08074	0.0406857	NNMT	6.957	5.38504	5.96762	9.73939
NM_006186	3.50826	1.89957	0.0491752	NR4A2	-0.426907	-1.18566	1.74978	3.31184
NM_006187	0.996149	2.60821	0.461177	OAS3	1.7795	2.11192	3.30251	2.47539
NM_006204	0.991441	2.90697	0.444571	PDE6C	2.31746	2.18033	3.90647	1.94716
NM_006206	2.79419	2.77642	0.0613029	PDGFRA	0.743935	0.574434	4.27058	1.30498
NM_006208	1.14389	3.09349	0.357574	ENPP1	2.22473	2.45341	4.08838	2.41901
NM_006290	6.69362	9.03536	2.85683e-08	TNFAIP3	3.78411	2.65916	9.3565	10.4741
NM_006291	3.96238	5.14081	7.8465e-05	TNFAIP2	1.64283	2.42549	5.07974	6.62027
NM_006329	1.66277	3.52663	0.16714	FBLN5	3.05213	1.21951	4.69208	2.94344
NM_006350	1.20541	2.2322	0.438454	FST	1.98194	0.355241	3.21983	1.42435
NM_006492	1.05372	2.16163	0.492451	ALX3	1.43779	1.40245	3.10165	1.30498
NM_006509	1.87142	4.13104	0.0672675	RELB	1.94366	3.45079	4.87657	4.6227
NM_006514	2.77308	3.35908	0.0561641	SCN10A	2.05557	-0.406476	4.93606	1.48052
NM_006517	2.15536	3.56625	0.0817467	SLC16A2	2.22473	1.84319	5.00763	2.16849
NM_006526	0.904869	4.3357	0.41417	ZNF217	4.21211	3.27426	2.29871	5.58417
NM_006598	1.06283	5.13235	0.242271	SLC12A7	3.28428	5.14515	5.55203	5.56481
NM_006610	0.86606	3.47457	0.446197	MASP2	3.12235	2.70632	4.38251	2.77398
NM_006645	1.31152	3.85079	0.23417	STARD10	1.73537	3.6807	4.77163	3.66687
NM_006713	0.778877	4.70435	0.429862	SUB1	4.4962	3.98794	3.31584	5.80922
NM_006734	2.22894	8.82859	0.0401157	HIVEP2	7.51154	7.10109	7.49336	10.3651
NM_006772	0.815012	3.95965	0.450956	SYNGAP1	2.85998	3.87896	4.96807	2.8612
NM_006806	0.75245	6.491	0.446822	BTG3	6.5631	5.30305	5.30703	7.54144
NM_006834	1.05999	4.84532	0.307002	RAB32	4.95167	2.65916	3.89319	5.97482
NM_006851	1.61289	6.63879	0.0865925	GLIPR1	6.09785	4.88825	6.48395	7.7183
NM_006909	3.40925	7.82202	0.00458092	RASGRF2	5.64618	4.79861	5.97289	9.579
NM_006914	4.37025	2.80455	0.00985771	RORB	-0.0729108	-2.122	4.44148	1.17484
NM_006946	0.99394	3.20202	0.433964	SPTBN2	1.7795	3.05496	4.274	1.98649
NM_006981	3.63377	3.63527	0.00272927	NR4A3	0.989162	0.764675	3.58171	5.06985
NM_006987	1.60876	5.1912	0.142143	RPH3AL	2.95925	4.79316	6.61308	3.35755
NM_006992	1.54608	2.19442	0.311763	LRRC23	1.43779	0.672688	3.14711	1.86513
NM_007031	2.24196	4.25191	0.0450942	HSF2BP	2.22473	3.03663	5.72688	2.96329
NM_007036	1.84314	9.8085	0.0885858	ESM1	9.35364	6.9947	9.3991	11.0564
NM_007043	1.27677	6.24817	0.175715	KRR1	6.0648	4.44254	6.16744	7.16016
NM_007050	4.51199	5.94584	0.00162919	PTPRT	2.85998	1.56479	7.83115	2.29918
NM_007065	0.94266	4.52239	0.2976	CDC37	3.42984	4.34905	4.9274	4.87929
NM_007170	1.31582	4.09575	0.198431	TESK2	3.22167	3.28982	5.17609	3.50024
NM_007193	1.34369	2.84989	0.314066	ANXA10	1.68984	2.14653	3.99201	1.77816
NM_007203	2.64024	4.18717	0.00996927	PALM2-AKAP2	2.51313	2.04011	5.36589	4.31039
NM_007207	1.32308	4.50128	0.15529	DUSP10	3.78411	3.58301	4.25336	5.50513
NM_007220	0.819368	3.28243	0.488317	CA5B	2.61407	2.90132	4.10383	2.75133
NM_007356	1.38478	4.07531	0.194596	LAMB4	3.44362	2.8602	5.27496	3.09507
NM_012068	1.56134	2.22108	0.302216	ATF5	0.743935	1.45862	2.95599	2.38997
NM_012081	0.92484	7.48273	0.348982	ELL2	7.38602	6.31415	6.49937	8.56307
NM_012118	2.24682	6.58132	0.0237981	NOCT	4.59829	5.40662	5.96973	7.98665
NM_012219	1.292	3.48213	0.270561	MRAS	2.66201	2.61041	4.63206	2.47539
NM_012242	0.68763	5.0305	0.407991	DKK1	4.48291	4.77668	5.33185	5.3174
NM_012281	2.66079	4.22496	0.0258909	KCND2	1.94366	2.5854	5.83153	2.36034
NM_012309	4.48305	5.6683	0.00131755	SHANK2	2.34709	1.80037	7.54769	2.02477
NM_012329	1.04035	3.27182	0.373524	MMD	2.25631	2.94129	3.28228	3.99076
NM_012335	1.49031	3.43313	0.238519	MYO1F	1.54395	2.98018	4.72243	1.94716
NM_012337	2.02558	2.72927	0.150541	CFAP45	0.989162	1.51268	4.03295	1.68561
NM_012342	1.98478	3.32697	0.109728	BAMBI	2.6854	0.574434	3.74338	4.16371
NM_012413	0.882178	2.81724	0.491803	QPCT	2.58949	1.80037	3.50813	2.60739
NM_012435	1.90266	3.07037	0.17133	SHC2	0.989162	2.21335	4.47751	1.24138
NM_012476	1.01175	2.53346	0.465778	VAX2	2.09103	1.56479	3.41209	1.94716
NM_012478	1.07538	3.53593	0.33267	WBP2	3.18932	2.50766	3.27547	4.42933
NM_013244	2.31089	5.1397	0.0364688	MGAT4C	4.3355	1.61509	6.57893	4.29481
NM_013266	3.69429	5.73098	0.00341568	CTNNA3	3.28428	2.39703	7.53883	3.00219
NM_013312	1.09017	2.08084	0.496925	HOOK2	0.334582	1.88479	3.02255	1.24138
NM_013385	4.02827	2.96609	0.00440782	CYTH4	-0.642902	0.0966735	4.2076	3.18234
NM_013427	1.16712	5.59991	0.197423	ARHGAP6	5.34584	4.21688	6.61645	5.12376
NM_014010	1.46793	6.60401	0.121672	ASTN2	5.82265	5.52971	7.80598	5.91747
NM_014067	0.849422	5.1172	0.46229	MACROD1	2.93993	5.36314	6.35186	2.6324
NM_014141	4.36571	5.64123	0.00115914	CNTNAP2	2.45988	1.84319	7.50359	2.44747
NM_014143	1.46403	7.14501	0.16643	CD274	6.8316	5.19972	5.89508	8.47637
NM_014214	0.989378	3.25817	0.428237	IMPA2	2.05557	3.01806	4.32763	2.06206
NM_014226	1.89305	3.76491	0.1452	MOK	1.59424	2.99924	5.25952	1.30498
NM_014243	1.13928	4.02993	0.319739	ADAMTS3	2.61407	3.7722	5.26469	2.33008
NM_014246	2.78319	4.24999	0.0182437	CELSR1	2.15943	2.27721	5.86139	2.52964
NM_014330	1.98108	5.03969	0.0367542	PPP1R15A	4.25181	2.90132	4.77887	6.272
NM_014361	3.82964	5.14324	0.0028326	CNTN5	2.53903	1.7107	6.95306	2.29918
NM_014391	1.36742	10.5343	0.237826	ANKRD1	10.4392	8.06977	8.91684	11.8888
NM_014398	1.88287	3.13429	0.12703	LAMP3	2.34709	1.08323	3.9753	3.43066
NM_014410	1.26272	2.72235	0.371344	CLUL1	1.38163	2.21335	3.87979	1.3659
NM_014421	1.98976	2.78312	0.154125	DKK2	1.54395	1.15298	4.07668	1.77816
NM_014453	1.60588	1.38643	0.363439	CHMP2A	0.0760793	0.355241	2.01793	1.58671
NM_014470	3.70236	4.90155	0.00161723	RND1	2.56448	1.40245	3.34214	6.66034
NM_014485	1.7996	2.32974	0.236847	HPGDS	0.989162	1.08323	3.48471	1.58671
NM_014496	0.995689	2.73179	0.459662	RPS6KA6	2.01923	2.11192	3.68806	1.90673
NM_014619	1.40343	6.30874	0.215509	GRIK4	4.27512	6.06557	7.71583	4.17226
NM_014624	0.950802	5.45885	0.26767	S100A6	5.29733	4.35646	5.38815	6.20481
NM_014636	0.839367	5.65325	0.375058	RALGPS1	4.68786	5.51654	6.72848	4.45058
NM_014654	1.44235	3.54616	0.288712	SDC3	1.13218	3.28982	4.92522	1.03178
NM_014728	2.37331	4.97733	0.0245672	FRMPD4	3.83727	2.50766	6.48173	3.80526
NM_014732	0.863089	3.4887	0.457977	KIAA0513	2.4325	3.32046	4.44755	2.60739
NM_014755	0.79808	4.72755	0.389147	SERTAD2	4.52889	3.95903	4.01671	5.67424
NM_014841	0.917374	4.04938	0.441423	SNAP91	4.40758	0.468996	4.4656	4.36364
NM_014872	0.822469	4.88317	0.351269	ZBTB5	4.44231	4.37847	4.42312	5.75046
NM_014906	2.64768	3.80169	0.0345307	PPM1E	2.12564	1.56479	5.37229	2.09842
NM_014960	1.26254	4.28122	0.229302	ARSG	3.71761	3.19381	5.49749	3.04006
NM_014971	3.23879	3.57078	0.0123072	EFR3B	1.13218	1.08323	5.15955	2.23531
NM_014978	4.25639	5.03844	0.00275788	SORCS3	2.09103	1.08323	6.89762	1.17484
NM_014989	1.40648	5.12005	0.159822	RIMS1	5.01304	2.42549	6.10066	4.96054
NM_015011	3.48019	4.68946	0.009192	MYO16	2.6854	0.851147	6.46463	1.73263
NM_015016	1.50971	3.23407	0.264034	MAST3	1.86391	2.48079	4.59152	1.03178
NM_015039	4.58516	4.5678	0.000312233	NMNAT2	1.06244	0.672688	6.34943	2.65698
NM_015059	2.28476	3.85242	0.0557351	TLN2	2.05557	2.39703	5.34816	2.33008
NM_015078	1.53717	5.11184	0.0790547	MCF2L2	4.23606	4.01629	6.13772	4.96054
NM_015082	3.70837	5.07794	0.00412003	FSTL4	2.81827	1.21951	6.87133	2.38997
NM_015085	2.70214	4.77244	0.0137123	RAP1GAP2	2.90051	2.75199	6.37751	3.18234
NM_015124	1.4602	3.44095	0.265011	GRAMD4	1.06244	3.16033	4.74478	1.77816
NM_015191	0.864452	7.76299	0.442513	SIK2	7.74438	6.55055	5.31535	9.02606
NM_015206	0.938165	2.93829	0.485949	KIAA1024	1.38163	2.88091	3.95414	1.8223
NM_015215	0.685491	7.61707	0.458121	CAMTA1	6.97727	7.44747	8.44347	7.07834
NM_015247	1.32449	6.42563	0.171251	CYLD	5.93667	5.20384	5.54497	7.63722
NM_015368	1.03898	5.915	0.268866	PANX1	5.29733	5.3107	4.86301	7.05887
NM_015404	1.53943	4.03121	0.169503	DFNB31	2.93993	3.09095	5.35625	2.58193
NM_015482	1.33936	5.2152	0.141762	SLC22A23	3.89859	4.73749	6.31913	4.65967
NM_015488	0.763374	4.43613	0.412711	PNKD	4.46275	3.27426	4.94895	4.51923
NM_015547	1.31917	3.60557	0.30811	ACOT11	1.73537	3.32046	4.93821	1.30498
NM_015559	1.51146	5.50356	0.107952	SETBP1	4.63479	4.44254	6.77387	4.53921
NM_015656	0.893363	3.56189	0.405452	KIF26A	2.81827	3.21026	3.67778	4.12898
NM_015688	1.74841	4.24804	0.107733	FAM184B	3.03403	3.12605	5.6248	2.8822
NM_015717	2.84426	0.813328	0.170257	CD207	-2.14116	-0.876811	1.20772	1.637
NM_015720	1.24835	2.73871	0.393797	PODXL2	0.743935	2.50766	3.9413	1.03178
NM_015993	1.18663	3.69646	0.263424	PLLP	3.31459	2.50766	3.8014	4.43645
NM_016232	3.39469	6.48761	0.00459078	IL1RL1	3.80561	4.08034	8.24891	4.35615
NM_016246	1.13383	3.23867	0.353307	HSD17B14	2.12564	2.79625	4.27741	2.41901
NM_016341	3.51379	4.31662	0.00614215	PLCE1	1.7795	1.45862	6.05667	1.90673
NM_016445	1.51497	2.31807	0.318895	PLEK2	1.1987	1.2831	3.4549	1.30498
NM_016498	1.22629	1.80375	0.442995	MTFP1	0.911961	1.00994	2.32532	2.02477
NM_016511	0.964397	5.91216	0.316072	CLEC1A	5.50874	5.17479	4.61328	7.07607
NM_016524	1.69461	3.43371	0.212276	SYT17	1.32319	2.8392	4.86301	1.03178
NM_016529	4.41543	5.36029	0.00106415	ATP8A2	2.15943	1.45862	7.21916	2.16849
NM_016533	2.07595	3.58798	0.0929751	NINJ2	2.37613	1.84319	5.02194	2.13388
NM_016599	1.05784	3.15262	0.396121	MYOZ2	3.15622	1.15298	3.88874	3.05863
NM_016848	1.10035	5.54539	0.249041	SHC3	4.41459	5.22828	6.72099	4.35615
NM_016952	0.722204	3.6206	0.498815	CDON	3.41593	2.92144	3.9711	3.8486
NM_017416	2.66885	5.92889	0.01737	IL1RAPL2	4.20403	3.8372	7.58808	3.95155
NM_017439	1.12186	4.22953	0.249972	GSAP	3.67151	3.37984	5.1614	3.85923
NM_017539	3.24599	4.10482	0.0122948	DNAH3	1.68984	1.61509	5.81519	1.637
NM_017545	4.97182	2.70575	0.00253334	HAO1	-0.642902	-3.00252	3.91526	3.05863
NM_017551	4.39458	5.8683	0.00169908	GRID1	2.34709	2.42549	7.74907	2.13388
NM_017649	0.898446	4.38476	0.3615	CNNM2	3.62389	4.02562	5.38973	3.50024
NM_017650	0.666904	4.72181	0.480319	PPP1R9A	4.00465	4.59441	5.65527	3.73772
NM_017705	3.68485	3.9963	0.00728966	PAQR5	1.73537	0.0966735	5.72938	1.68561
NM_017791	0.886324	3.79823	0.43525	FLVCR2	2.88039	3.53157	4.89	2.38997
NM_017926	0.785605	6.84786	0.421491	GPATCH2L	6.67247	6.07009	5.58819	7.92852
NM_017935	2.75578	3.55922	0.0351928	BANK1	1.98194	0.851147	5.12209	1.94716
NM_017947	0.807531	3.48338	0.489857	MOCOS	2.75336	3.16033	4.4952	2.2676
NM_017950	0.789362	3.47701	0.492841	CCDC40	2.66201	3.24261	4.37934	2.68115
NM_018000	1.19395	3.69167	0.342755	MREG	2.28721	3.35045	5.00146	1.24138
NM_018012	2.29329	5.38297	0.0430098	KIF26B	3.26888	4.18394	6.99562	3.09507
NM_018058	1.99849	5.06271	0.0364567	CRTAC1	4.11211	3.17716	6.36795	4.49216
NM_018074	0.897876	3.14136	0.453754	CCDC94	2.22473	2.8602	3.78232	3.07697
NM_018125	1.2148	4.62398	0.215682	ARHGEF10L	3.68317	4.02562	5.80104	3.55359
NM_018140	1.26114	3.35402	0.349742	CEP72	1.73537	3.01806	4.65846	1.03178
NM_018150	0.982877	5.88719	0.265375	RNF220	5.26277	5.34463	6.82721	5.41071
NM_018242	1.6096	2.86442	0.235677	SLC47A1	1.49184	1.96454	4.11149	1.637
NM_018316	1.49819	3.05562	0.262997	KLHL26	1.32319	2.50766	4.30106	1.73263
NM_018327	1.50169	3.66779	0.196023	SPTLC3	2.77533	2.55995	4.93173	2.44747
NM_018349	1.82497	3.54377	0.160824	MCTP2	1.68984	2.70632	4.99318	1.3659
NM_018357	0.771898	3.9065	0.450355	LARP6	3.88855	2.8392	3.8249	4.54581
NM_018363	0.685196	5.33401	0.426512	RNLS	5.39631	4.27278	5.92584	5.24628
NM_018398	4.32979	5.38036	0.00159593	CACNA2D3	2.09103	1.80037	7.24422	1.86513
NM_018440	3.65554	3.3729	0.0134751	PAG1	0.830393	0.0966735	5.06797	1.03178
NM_018460	4.55504	4.72561	0.00172414	ARHGAP15	1.59424	0.231742	6.58376	1.10509
NM_018557	1.71324	6.72827	0.0866768	LRP1B	6.30831	4.28059	7.85418	6.52499
NM_018689	1.08791	4.86012	0.263377	CEMIP	3.68317	4.56912	6.00204	3.76059
NM_018702	4.55606	5.46814	0.00123607	ADARB2	2.51313	0.468996	7.33377	2.33008
NM_018723	5.36818	6.3237	0.000546153	RBFOX1	2.66201	0.231742	8.23757	2.8612
NM_018842	0.963285	3.83644	0.353773	BAIAP2L1	3.25331	3.22653	4.69972	3.43066
NM_018850	1.80261	2.54044	0.203347	ABCB4	1.59424	0.851147	3.61445	2.16849
NM_018897	1.55661	4.65616	0.120641	DNAH7	3.57464	3.7157	5.96233	3.48659
NM_018947	0.904591	2.99222	0.482045	CYCS	2.83928	1.96454	2.03415	4.05692
NM_018948	1.15803	5.81874	0.164274	ERRFI1	5.27438	4.94833	6.26087	6.29568
NM_019098	3.83454	3.31964	0.0108445	CNGB3	-0.239078	0.672688	5.0199	1.03178
NM_019842	3.29271	4.59888	0.00815606	KCNQ5	1.68984	2.45341	6.33313	2.13388
NM_019850	3.68886	3.71921	0.00956997	NGEF	0.448313	1.15298	5.45294	1.10509
NM_019856	3.60834	3.37817	0.0101385	MYOM1	0.651965	0.468996	5.02397	1.68561
NM_020184	1.63345	3.09553	0.207708	CNNM4	1.49184	2.33836	4.32434	2.09842
NM_020200	0.846455	3.91264	0.42176	PRTFDC1	3.3589	3.42283	4.86301	3.09507
NM_020210	0.892743	3.52626	0.467343	SEMA4B	2.01923	3.51842	4.64796	1.86513
NM_020226	1.31628	1.74354	0.420705	PRDM8	0.743935	0.851147	2.56748	1.42435
NM_020247	1.11908	4.2515	0.291823	ADCK3	3.03403	3.92952	5.42553	2.96329
NM_020311	4.09191	5.8509	0.00102218	ACKR3	3.07001	2.14653	3.63054	7.6873
NM_020366	2.34179	2.74762	0.102269	RPGRIP1	1.43779	0.468996	4.07668	1.90673
NM_020424	1.16221	5.85823	0.227532	LYRM1	5.2432	5.0795	4.61598	7.08742
NM_020529	3.77874	6.63565	0.00015529	NFKBIA	4.04137	3.39431	6.80197	8.01427
NM_020647	1.64642	2.68255	0.237558	JPH1	1.38163	1.66368	3.88427	1.68561
NM_020650	0.925845	3.63976	0.401095	RCN3	2.19245	3.60806	4.38568	3.44485
NM_020655	1.96738	3.37422	0.138655	JPH3	1.64283	2.27721	4.83087	1.3659
NM_020686	1.58388	3.77718	0.174075	ABAT	2.28721	3.05496	5.09529	2.38997
NM_020689	4.67914	4.94261	0.000953157	SLC24A3	1.64283	0.468996	6.80611	1.58671
NM_020700	0.960058	5.90423	0.295327	PPM1H	5.99632	4.09813	6.47803	6.09439
NM_020719	0.824405	3.80253	0.459226	PRR12	2.58949	3.76107	4.78847	2.79629
NM_020724	2.66625	4.0137	0.0230941	RNF150	2.48675	1.51268	5.52789	2.8822
NM_020727	1.43057	4.5309	0.124698	ZBTB21	3.77324	3.49175	4.274	5.58096
NM_020752	3.49616	4.20452	0.00898384	GPR158	1.73537	1.2831	5.95808	1.3659
NM_020768	0.892151	5.66656	0.319618	KCTD16	4.72783	5.46263	6.62986	4.99469
NM_020777	4.75524	5.96035	0.00144707	SORCS2	2.37613	1.84319	7.86669	1.637
NM_020780	2.57713	3.0482	0.0682479	PTCHD2	1.49184	0.672688	4.55826	1.3659
NM_020794	2.32131	4.45683	0.0340665	LRRC7	3.45727	1.7107	5.88617	3.57954
NM_020818	2.78477	4.49085	0.0184581	UNC79	2.97831	1.66368	6.12168	2.65698
NM_020859	1.07972	5.26596	0.255125	SHROOM3	4.4962	4.71461	6.44049	4.01949
NM_020868	4.21088	5.22758	0.00167121	DPP10	2.40459	1.15298	7.06831	2.20229
NM_020927	1.70679	4.39871	0.18002	VAT1L	1.32319	4.06233	5.87833	1.90673
NM_020945	1.8058	5.11587	0.0770175	WDFY4	4.13776	3.66885	6.5482	3.61762
NM_020949	0.708381	4.29922	0.496488	SLC7A14	3.25331	4.30377	5.3087	3.02125
NM_020950	1.56181	3.01489	0.221496	KIAA1614	1.73537	2.14653	4.09998	2.50277
NM_020974	2.66656	3.2235	0.0619471	SCUBE2	0.553729	1.7107	4.79562	1.10509
NM_020992	1.04875	6.19864	0.288424	PDLIM1	5.37129	5.76507	4.88777	7.3975
NM_021071	0.728878	5.64934	0.483956	ART4	6.11302	2.61041	5.6928	6.19225
NM_021080	4.41903	5.99683	0.00142422	DAB1	2.90051	1.92521	7.87093	2.68115
NM_021101	4.17463	2.39857	0.0142246	CLDN1	-0.0729108	-3.00252	2.84082	3.57954
NM_021110	3.22328	3.68664	0.0176412	COL14A1	1.64283	0.672688	5.35463	1.53459
NM_021116	2.98476	3.81067	0.0254917	ADCY1	1.32319	1.80037	5.47835	1.3659
NM_021120	1.182	2.84706	0.382099	DLG3	1.86391	2.21335	3.96264	1.637
NM_021127	1.16674	4.70255	0.22601	PMAIP1	4.28281	3.65689	3.80613	5.8604
NM_021136	3.68832	4.21541	0.00555515	RTN1	1.59424	1.08323	5.97289	1.637
NM_021137	1.73678	5.97731	0.0633681	TNFAIP1	5.02225	4.67959	5.39602	7.2447
NM_021149	0.939895	5.0356	0.318962	COTL1	2.92036	5.21203	5.49457	5.34035
NM_021158	0.911653	3.66472	0.402603	TRIB3	2.56448	3.53157	3.39335	4.48532
NM_021185	1.80188	2.47166	0.22871	CATSPERG	0.911961	1.40245	3.72351	1.30498
NM_021202	1.05504	4.12733	0.316655	TP53INP2	3.88855	2.98018	3.16195	5.25838
NM_021217	1.36134	2.13982	0.372575	ZNF77	1.54395	0.764675	2.85001	2.20229
NM_021614	2.76738	4.73242	0.0135463	KCNN2	3.48419	1.2831	3.84803	6.29176
NM_021623	1.64235	3.86605	0.136722	PLEKHA2	2.99712	2.50766	5.11067	3.00219
NM_021722	1.25477	4.10646	0.223038	ADAM22	3.37337	3.24261	5.21218	3.34247
NM_021804	1.52722	2.15127	0.320365	ACE2	0.830393	1.2831	3.09393	1.8223
NM_021818	2.10221	7.50088	0.0735568	SAV1	6.70287	5.03401	5.44082	9.08895
NM_021827	1.55174	2.57561	0.2725	CCDC81	1.86391	1.00994	3.63587	2.02477
NM_021965	0.910935	4.63689	0.308469	PGM5	4.43543	3.64484	5.30034	4.62893
NM_022062	4.14086	4.92917	0.00223575	PKNOX2	2.25631	0.672688	6.75686	1.94716
NM_022073	1.66988	1.73646	0.331249	EGLN3	1.06244	-0.406476	2.72567	1.24138
NM_022121	1.12126	4.24571	0.233586	PERP	3.70622	3.40864	4.4566	4.8845
NM_022124	3.93119	4.49168	0.00430796	CDH23	1.59424	1.21951	6.305	1.10509
NM_022128	1.40774	4.51001	0.117349	RBKS	3.83727	3.37984	4.92305	5.13693
NM_022129	0.78409	3.28656	0.4993	PBLD	3.18932	2.27721	3.80613	3.32724
NM_022131	4.22029	5.17748	0.00177831	CLSTN2	2.25631	1.2831	7.02382	1.94716
NM_022166	2.59628	4.68147	0.039216	XYLT1	1.73537	3.43688	6.35186	1.90673
NM_022168	1.77681	4.69175	0.104379	IFIH1	4.09474	2.65916	3.07053	6.1668
NM_022465	1.15274	2.06496	0.467187	IKZF4	1.06244	1.40245	3.05471	1.10509
NM_022652	0.964293	5.35148	0.243032	DUSP6	4.63479	4.9186	5.58819	5.89181
NM_022746	1.47922	2.17794	0.336603	2001-03-01	1.64283	0.355241	3.11696	1.8223
NM_022751	1.68967	4.20846	0.118439	GAREM	3.40188	2.68293	5.53787	3.04006
NM_022818	1.42757	5.58102	0.1594	MAP1LC3B	4.96607	4.37117	3.92834	6.96108
NM_022823	1.71412	1.71935	0.311709	FNDC4	0.0760793	0.764675	2.67485	1.3659
NM_022844	3.23475	4.04958	0.0142636	MYH11	1.49184	1.7107	5.7614	1.48052
NM_023070	1.28638	1.4548	0.459007	ZFP69B	0.743935	0.231742	2.2158	1.17484
NM_023112	1.14048	2.3458	0.447686	OTUB2	1.06244	1.92521	3.30919	1.58671
NM_024122	0.77215	3.62886	0.481765	APOO	2.85998	3.39431	4.4566	3.05863
NM_024532	0.862407	6.23624	0.339844	SPAG16	6.08472	5.27204	7.06585	5.89698
NM_024628	3.90897	3.91262	0.00467524	SLC12A8	0.830393	0.851147	5.66572	1.42435
NM_024645	3.59054	4.6288	0.00767309	ZMAT4	1.26229	2.30811	6.42057	1.3659
NM_024677	1.08782	2.45827	0.466629	NSUN7	0.553729	2.33836	3.50231	1.30498
NM_024701	0.977536	2.64398	0.497914	ASB13	1.98194	1.96454	3.73844	1.03178
NM_024758	1.30972	1.1203	0.481674	AGMAT	-0.426907	0.574434	1.64804	1.24138
NM_024761	2.42625	4.13335	0.051466	MOB3B	1.59424	2.92144	5.72563	1.94716
NM_024769	3.29117	3.86474	0.0141663	CLMP	1.54395	1.15298	5.56604	1.42435
NM_024787	1.2986	5.41861	0.214199	RNF122	4.98504	4.15873	3.4549	6.7938
NM_024812	1.65234	3.68489	0.153153	BAALC	2.53903	2.61041	4.98068	2.52964
NM_024837	4.36805	3.78761	0.00297116	ATP8B4	0.989162	-1.18566	5.53645	1.68561
NM_024867	1.40807	3.84408	0.203486	SPEF2	3.34428	2.33836	5.01174	3.00219
NM_024913	2.93617	3.95109	0.0263212	CPED1	1.26229	2.14653	5.6248	1.42435
NM_024921	2.19493	2.19302	0.172787	POF1B	1.06244	-0.21858	3.44886	1.30498
NM_025009	0.722261	6.22257	0.456358	CEP135	6.17216	5.34463	5.04614	7.25782
NM_025057	0.957904	2.65717	0.470371	CCDC176	1.94366	2.11192	3.37436	2.44747
NM_025059	2.02972	3.58276	0.0991942	CCDC170	2.51313	1.7107	4.99733	2.20229
NM_025074	1.2937	5.59259	0.179981	FRAS1	4.4962	5.03401	6.84858	4.34106
NM_025079	2.70032	6.35234	0.00398888	ZC3H12A	4.3355	4.54338	6.46313	7.60362
NM_025145	2.65292	3.42513	0.042583	CFAP43	1.54395	1.40245	4.95109	1.94716
NM_025153	3.03103	4.07539	0.0237643	ATP10B	1.1987	2.24563	5.77955	1.24138
NM_025195	2.50946	5.4982	0.00462694	TRIB1	3.75124	3.74986	5.64607	6.68893
NM_025214	0.902166	3.15618	0.455775	CCDC68	3.05213	1.88479	3.91526	2.8612
NM_025228	3.06832	2.46067	0.0688557	TRAF3IP3	0.911961	-2.122	3.93267	1.17484
NM_025236	1.4208	1.81203	0.379918	RNF39	0.911961	0.672688	2.64347	1.58671
NM_025239	0.791047	6.33778	0.369062	PDCD1LG2	6.14289	5.57488	6.19296	7.04031
NM_025244	1.07373	4.11513	0.284949	TSGA10	3.15622	3.69246	5.04814	3.67892
NM_030583	2.12266	4.11843	0.0647229	MATN2	2.92036	2.30811	5.59367	2.60739
NM_030625	1.1771	3.68746	0.294289	TET1	3.45727	2.11192	4.69972	3.09507
NM_030643	2.02248	1.98057	0.202705	APOL4	0.553729	0.468996	2.89512	2.02477
NM_030753	2.17276	3.36185	0.105009	WNT3	1.49184	2.07646	4.85162	1.42435
NM_030780	0.835518	5.8429	0.362092	SLC25A32	5.64021	5.02474	4.96384	6.8575
NM_030820	1.64449	3.75178	0.185445	COL21A1	3.4708	0.574434	4.99318	2.8822
NM_030952	4.36568	5.63893	9.56962e-06	NUAK2	2.19245	2.21335	5.76505	7.07834
NM_030958	6.29853	12.5995	0.00110768	SLCO5A1	8.17134	4.53033	14.5731	7.07036
NM_030964	0.905488	6.47111	0.352831	SPRY4	6.04459	5.84626	5.20504	7.60441
NM_031302	1.42495	3.24889	0.251279	GLT8D2	2.48675	2.07646	4.41694	2.29918
NM_031303	1.10512	4.03278	0.312412	KATNAL2	2.73106	3.76107	5.18156	2.81825
NM_031414	2.87259	2.92496	0.0447921	STK31	0.911961	0.574434	4.42619	1.58671
NM_031439	1.02984	5.31416	0.259029	SOX7	4.87747	4.51717	4.45961	6.40675
NM_031461	1.01755	4.60289	0.30966	CRISPLD1	4.48957	3.27426	3.52545	5.74474
NM_031468	4.53838	5.10308	0.00203064	CALN1	2.01923	0.574434	6.97896	1.10509
NM_031476	2.83474	3.54368	0.0294867	CRISPLD2	2.05557	0.355241	5.06007	2.38997
NM_031891	1.06534	5.44712	0.404815	CDH20	2.31746	5.66418	6.80256	2.2676
NM_031914	2.72899	3.2003	0.0517619	SYT16	1.73537	0.231742	4.7149	1.77816
NM_031955	3.29801	3.91812	0.0204418	SPATA16	2.25631	-0.876811	5.59913	1.86513
NM_031956	2.02339	3.82257	0.105506	TTC29	2.01923	2.72933	5.32856	1.637
NM_032119	3.61351	4.8831	0.00384151	ADGRV1	2.12564	2.11192	6.66088	2.2676
NM_032151	1.26236	6.21313	0.184932	PCBD2	5.36768	5.50659	7.38408	5.35545
NM_032206	1.29598	4.48293	0.213222	NLRC5	3.23758	3.98794	5.74301	3.07697
NM_032432	2.37294	4.96181	0.0601009	ABLIM2	2.05557	3.95903	6.61712	1.90673
NM_032445	0.947305	6.1365	0.342894	MEGF11	5.10696	5.9306	7.29433	4.75385
NM_032451	1.22269	2.71448	0.388166	SPIRE2	1.13218	2.368	3.84803	1.42435
NM_032489	1.17458	1.75513	0.483097	ACRBP	1.38163	0.231742	2.51064	1.48052
NM_032511	1.20358	3.59116	0.291887	FAXC	3.13939	2.39703	4.66629	2.79629
NM_032531	4.07922	5.46889	0.00231366	KIRREL3	2.48675	2.04011	7.31812	2.09842
NM_032649	6.04896	2.62093	0.000739855	CNDP1	-2.14116	-3.00252	4.045	2.44747
NM_032784	0.780954	4.16593	0.471644	RSPO3	4.50936	1.80037	3.95414	4.8897
NM_032785	4.35131	5.8533	0.00135374	AGBL4	2.66201	2.11192	7.72085	2.58193
NM_032829	1.8717	2.21932	0.219122	FAM222A	0.830393	0.932727	3.19118	2.09842
NM_032833	1.19347	4.50603	0.250128	PPP1R15B	4.28281	3.03663	3.28228	5.74474
NM_032867	1.49335	3.25132	0.218505	MICALCL	1.94366	2.50766	4.35372	2.65698
NM_032950	1.09436	2.45682	0.456914	MMP28	1.98194	1.34401	3.51393	1.24138
NM_033026	1.25712	4.11709	0.226074	PCLO	3.31459	3.32046	5.2578	3.21582
NM_033027	2.59433	5.86303	0.00567733	CSRNP1	3.63594	4.36383	5.75529	7.18362
NM_033063	2.00535	3.67031	0.0896027	MAP6	2.45988	2.07646	5.04013	2.58193
NM_033103	2.11718	3.27883	0.125392	RHPN2	0.553729	2.42549	4.72991	1.58671
NM_033120	4.51436	2.11607	0.0121385	NKD2	-3.02015	-0.876811	3.34864	2.20229
NM_033219	1.13544	2.55929	0.416201	TRIM14	1.64283	1.92521	3.49647	1.94716
NM_033225	4.46302	6.0883	0.00152997	CSMD1	3.12235	1.56479	7.96198	2.90291
NM_033262	4.92044	3.71175	0.000426193	SLC8A3	0.0760793	-0.876811	5.40696	2.41901
NM_033272	3.48856	3.85169	0.0169332	KCNH7	2.01923	-1.18566	5.55343	1.68561
NM_033326	2.65954	4.48794	0.0160807	SOX6	2.6854	2.45341	6.05766	3.07697
NM_033334	0.759541	4.79608	0.436674	NR6A1	3.88855	4.69136	5.83732	3.52716
NM_033343	2.03281	3.33001	0.123159	LHX4	1.26229	2.33836	4.75215	1.77816
NM_033364	2.84982	2.52978	0.056589	MAATS1	0.989162	-0.622561	3.54822	2.83988
NM_033547	5.10047	10.2483	0.000958346	INTS4	6.20084	6.00321	12.1844	6.11006
NM_033647	1.15006	4.57178	0.222671	HELB	4.0683	3.66885	3.94559	5.64688
NM_052847	2.3226	4.60879	0.0267	GNG7	3.20559	2.72933	6.08614	3.48659
NM_052862	2.54295	3.51569	0.0433929	RCSD1	2.25631	0.672688	4.9339	2.68115
NM_052864	4.14966	6.18604	0.000150867	TIFA	3.18932	2.68293	5.53645	7.84071
NM_052874	4.40253	2.23086	0.0131451	STX1B	-1.20569	-1.57916	3.63054	1.77816
NM_052896	4.55468	5.62914	0.00145602	CSMD2	2.15943	1.80037	7.51736	1.637
NM_052898	3.84596	4.27036	0.00493267	XKR4	1.54395	0.932727	6.05667	1.30498
NM_052904	3.34381	3.66673	0.0163382	KLHL32	1.38163	0.764675	5.36429	1.17484
NM_052907	5.03861	4.40981	0.000880894	TMEM132B	0.911961	-0.876811	6.26518	1.10509
NM_052917	3.58574	4.28428	0.00671445	GALNT13	1.68984	1.34401	6.0447	1.53459
NM_052918	4.10937	4.24566	0.00335662	SORCS1	1.26229	0.672688	6.0477	1.24138
NM_052929	2.82543	3.99352	0.0334482	FHAD1	2.22473	1.51268	5.66962	1.17484
NM_052943	1.60745	1.16936	0.374073	FAM46B	0.211113	-0.21858	1.58337	1.637
NM_052961	2.00068	3.11621	0.13127	SLC26A8	1.26229	2.04011	4.47157	1.90673
NM_052964	4.00018	3.8607	0.00442702	CLNK	1.38163	-0.622561	5.5813	1.94716
NM_052966	3.63385	3.89137	0.00687833	FAM129A	0.448313	1.51268	5.60321	1.77816
NM_052998	1.34991	2.6309	0.341456	AZIN2	1.86391	1.51268	3.76298	1.53459
NM_053002	2.42577	3.71744	0.0619418	MED12L	2.12564	1.80037	5.29698	1.42435
NM_053025	0.707138	5.93309	0.406124	MYLK	5.4069	5.64312	6.57686	5.7899
NM_053276	2.43892	4.03272	0.0570023	VIT	3.01569	0.764675	5.60049	2.13388
NM_054110	2.03481	2.74185	0.161174	GALNT15	1.43779	1.08323	4.13048	1.10509
NM_057159	0.808664	4.61346	0.378781	LPAR1	4.69364	3.22653	5.06797	4.8152
NM_058164	3.79451	3.44858	0.00921017	OLFM2	-0.239078	0.932727	5.14281	1.3659
NM_058165	3.42969	2.28389	0.0524115	MOGAT1	0.448313	-3.00252	3.65697	1.68561
NM_080430	1.36803	1.11059	0.456003	SELM	0.211113	0.0966735	1.26382	1.73263
NM_080539	0.877469	3.75548	0.453395	COLQ	2.05557	3.8372	4.81453	2.50277
NM_080676	2.45545	6.61396	0.0288715	MACROD2	4.78307	5.02008	8.24565	4.65967
NM_080682	6.73971	5.83637	4.10514e-10	VCAM1	0.0760793	0.0966735	6.79306	6.83209
NM_080683	1.07188	4.08055	0.29995	PTPN13	3.54937	3.25852	5.12588	3.28054
NM_080742	2.3295	2.91511	0.107326	B3GAT2	1.32319	1.08323	4.39513	1.03178
NM_080826	1.48518	3.30399	0.253613	ISM1	1.82232	2.65916	4.61328	1.58671
NM_130773	4.21176	5.107	0.00222554	CNTNAP5	2.22473	1.15298	6.95626	1.68561
NM_130901	2.30589	3.5829	0.0743553	OTUD7A	2.01923	1.84319	5.11829	1.53459
NM_133265	2.34196	2.36264	0.136758	AMOT	0.989162	0.0966735	3.72351	1.10509
NM_133445	2.43501	2.99494	0.0933648	GRIN3A	1.73537	0.355241	4.48638	1.24138
NM_133448	4.96577	5.21112	0.000701419	TMEM132D	1.82232	-0.0523592	7.09466	1.73263
NM_133463	2.40713	2.41673	0.124664	AMZ1	0.334582	0.851147	3.78232	1.24138
NM_133468	2.39062	4.37629	0.0279344	BMPER	3.13939	2.04011	5.83385	3.40186
NM_133478	2.37118	4.32599	0.0449907	SLC4A5	2.15943	3.01806	5.90504	2.29918
NM_133625	1.21558	4.06836	0.292214	SYN2	2.48675	3.80506	5.34166	2.2676
NM_133638	2.31652	3.5644	0.0640027	ADAMTS19	2.34709	1.2831	5.01787	2.29918
NM_138409	0.781709	3.88947	0.46383	MRAP2	4.10345	2.11192	4.16035	4.25511
NM_138451	1.16432	2.25354	0.442872	IQCD	0.743935	1.92521	3.11696	1.8223
NM_138453	1.47955	4.46319	0.145975	RAB3C	3.54937	3.46457	5.73807	3.31184
NM_138455	1.76525	6.10555	0.118229	CTHRC1	5.42785	4.29608	3.91087	7.63025
NM_138569	1.31333	5.19914	0.171409	MLIP	4.4962	4.24908	6.44808	3.99076
NM_138573	1.72896	2.22683	0.258899	NRG4	0.911961	1.08323	3.20557	1.98649
NM_138618	1.37892	3.20016	0.300777	RHCE	1.68984	2.68293	4.48638	1.3659
NM_138691	0.846959	5.45341	0.318722	TMC1	5.33479	4.44948	6.11025	5.41792
NM_138694	4.49961	4.45221	0.00124694	PKHD1	0.830393	0.851147	6.28225	1.42435
NM_138712	1.36129	3.45163	0.26076	PPARG	1.98194	2.96087	4.64532	2.33008
NM_138723	1.35643	2.25694	0.373167	BCL2L14	0.911961	1.61509	3.26176	1.58671
NM_138801	1.30931	3.25946	0.298742	GALM	2.09103	2.63499	4.45961	1.94716
NM_138811	1.34141	2.53862	0.323685	C7orf31	1.90434	1.34401	3.12456	2.83988
NM_139057	4.37708	4.59816	0.00178078	ADAMTS17	1.1987	1.00994	6.43973	1.17484
NM_139072	4.83454	4.83693	0.000137505	DNER	1.43779	0.0966735	6.61645	3.18234
NM_139164	0.874648	7.12384	0.400404	STARD4	7.14269	5.7981	5.5813	8.29148
NM_139167	4.42899	4.94832	0.00199361	SGCZ	1.82232	0.851147	6.81259	1.10509
NM_139239	1.44402	2.40031	0.314154	NFKBID	0.911961	1.84319	2.70556	3.05863
NM_144569	1.08767	3.97897	0.338228	SPOCD1	2.12564	3.92952	5.12209	2.75133
NM_144633	2.57041	3.59798	0.047952	KCNH8	1.43779	1.96454	5.16508	1.68561
NM_144648	1.85748	3.68632	0.112758	LRGUK	2.25631	2.55995	5.03005	2.55603
NM_144651	1.08765	5.20406	0.225139	PXDNL	4.3575	4.70883	6.23567	4.56542
NM_144658	1.79535	3.843	0.113499	DOCK11	3.18932	1.7107	5.08948	3.14806
NM_144696	2.85107	3.40096	0.041502	AXDND1	1.59424	0.851147	5.01583	1.17484
NM_144702	1.14459	2.64289	0.43436	LRRC71	0.743935	2.48079	3.74338	1.3659
NM_144725	1.71571	3.03387	0.230266	TTC23L	0.334582	2.55995	4.37298	1.42435
NM_144972	0.952432	2.47453	0.490414	LDHAL6A	1.98194	1.75623	2.69539	2.94344
NM_144975	1.43362	5.64609	0.107887	SLFN5	4.97558	4.49719	5.22637	6.76299
NM_144992	4.9434	3.91166	0.00070187	VWA3B	-0.239078	-0.0523592	5.70805	1.48052
NM_145003	0.763593	5.24933	0.415266	TSNARE1	4.29806	5.17479	6.26689	4.13774
NM_145109	1.27189	5.03759	0.163731	MAP2K3	3.07001	4.89844	5.42706	5.62212
NM_145345	0.877168	3.86293	0.394695	UBXN11	2.97831	3.60806	4.61058	3.63009
NM_145804	2.17001	4.37833	0.0609395	ABTB2	2.25631	3.30522	5.91054	2.50277
NM_147129	0.809809	4.04918	0.410149	ALS2CL	3.20559	3.86863	4.1267	4.60386
NM_147175	3.07383	4.21189	0.0220568	HS6ST2	1.38163	2.30811	5.93667	1.10509
NM_147182	1.99249	6.35603	0.0594674	KCNIP4	5.22337	4.80404	7.85361	4.82608
NM_147187	0.736339	8.16365	0.444941	TNFRSF10B	7.10742	8.19129	7.50249	9.06447
NM_148674	1.10504	2.57717	0.422597	SMC1B	1.43779	2.14653	3.46091	2.09842
NM_152281	1.23605	5.90777	0.21004	GORAB	5.76345	4.10695	5.03207	7.08628
NM_152328	1.07184	2.37367	0.469021	ADSSL1	0.989162	2.07646	3.34864	1.48052
NM_152335	2.70876	4.26796	0.0268916	C15orf27	1.49184	2.81789	5.89397	2.2676
NM_152336	4.28743	5.02302	0.00167259	AGBL1	1.68984	1.56479	6.87415	1.58671
NM_152372	2.93344	3.05762	0.0517299	MYOM3	1.54395	-0.622561	4.63206	1.17484
NM_152403	3.12617	4.15005	0.011925	EGFLAM	2.01923	1.56479	5.81988	2.16849
NM_152431	1.6775	2.40114	0.260881	PIWIL4	1.26229	1.15298	3.54822	1.58671
NM_152495	3.04472	3.86183	0.0210218	CNIH3	1.26229	1.84319	5.53217	1.53459
NM_152503	1.00482	3.09476	0.419115	MROH8	2.73106	2.07646	4.06093	2.33008
NM_152543	2.20765	3.5841	0.0634987	C4orf45	2.28721	1.7107	4.94466	2.75133
NM_152548	1.81784	2.49428	0.216715	FAM81B	1.73537	0.355241	3.60905	1.98649
NM_152550	0.980196	4.34505	0.380332	SH3RF2	2.93993	4.24908	5.56045	2.41901
NM_152573	2.18084	2.51943	0.14928	RASEF	1.38163	0.231742	3.85261	1.3659
NM_152597	0.649812	4.99586	0.444555	FSIP1	4.47623	4.75442	5.61943	4.80973
NM_152666	4.5952	4.26778	0.00133503	PLD5	1.13218	-0.406476	6.08322	1.53459
NM_152701	3.66191	4.64665	0.00383078	ABCA13	2.01923	1.61509	6.41748	2.09842
NM_152716	0.927192	6.05443	0.358491	PATL1	6.00099	4.78769	4.64796	7.22223
NM_152721	2.96927	3.97146	0.0209517	DOK6	2.22473	1.08323	5.6248	1.86513
NM_152731	1.3833	3.21374	0.256902	BEND6	2.45988	2.11192	4.274	2.6324
NM_152763	2.15635	2.70761	0.138249	AKNAD1	1.59424	0.468996	4.07275	1.42435
NM_152765	4.75196	2.0763	0.0096306	C8orf46	-1.20569	-3.00252	3.24792	2.33008
NM_152770	1.7699	5.12263	0.0747648	C4orf22	4.64675	2.61041	6.32409	4.70163
NM_152788	3.20007	5.84819	0.0060164	ANKS1B	3.62389	3.32046	7.58361	3.70273
NM_152879	0.658491	5.81738	0.431631	DGKD	5.1327	5.70538	5.82921	6.3381
NM_152890	2.36897	4.38767	0.0401564	COL24A1	2.90051	2.50766	5.95914	2.47539
NM_152990	3.03901	2.49423	0.0557459	PXT1	0.743935	-0.876811	3.90206	1.637
NM_153021	3.49413	4.32175	0.00563021	PLB1	1.82232	1.45862	6.0497	2.09842
NM_153046	2.50385	3.52922	0.0442357	TDRD9	2.19245	1.00994	4.94895	2.65698
NM_153211	0.752261	4.03693	0.487846	TTC39C	3.01569	3.97837	5.06403	2.72831
NM_153213	1.2755	2.44222	0.388762	ARHGEF19	0.989162	1.96454	3.49647	1.53459
NM_153228	3.5744	4.43231	0.00278283	ANKFN1	2.22473	0.851147	6.09003	3.13062
NM_153340	1.16949	2.11366	0.449751	ATXN7L2	1.06244	1.51268	2.91277	1.8223
NM_153341	0.667333	4.81654	0.436108	RNF19B	4.26739	4.58182	5.22284	4.96547
NM_153360	0.867061	3.42186	0.49291	APCDD1L	1.64283	3.51842	4.4952	1.98649
NM_153366	3.00253	3.43854	0.0328649	SVEP1	1.38163	0.932727	5.07974	1.10509
NM_153429	2.98633	4.84189	0.0148079	CPNE4	2.93993	2.27721	6.56225	2.16849
NM_153456	0.982641	6.42686	0.280249	HS6ST3	6.20287	5.37413	7.3235	6.07171
NM_153498	2.35474	5.56004	0.0346661	CAMK1D	3.56206	4.21688	7.17869	3.38724
NM_153610	1.65971	2.96403	0.217396	CMYA5	1.54395	2.04011	4.23943	1.68561
NM_153767	2.66945	2.42334	0.0897698	KCNJ1	0.743935	-0.0523592	3.79189	1.48052
NM_153835	1.17473	2.89134	0.356003	ADGRF3	2.40459	1.75623	3.79189	2.50277
NM_172069	1.92185	3.24427	0.150735	PLEKHH2	1.73537	2.04011	4.66629	1.42435
NM_172211	2.69105	5.62524	0.00693347	CSF1	3.88855	3.5446	4.76679	7.16767
NM_172364	2.57615	3.60198	0.0528725	CACNA2D4	1.86391	1.56479	5.19785	1.30498
NM_172374	3.03308	2.51506	0.0390506	IL4I1	0.448313	-0.0523592	3.55386	2.83988
NM_172388	0.738366	6.28447	0.388997	NFATC1	5.88962	5.84099	6.41439	6.77146
NM_173076	2.56636	3.566	0.0465049	ABCA12	2.09103	1.15298	5.09915	1.98649
NM_173174	1.96114	4.49912	0.0586618	PTK2B	3.52365	2.70632	5.87608	3.50024
NM_173354	1.79246	2.92211	0.162497	SIK1	1.59424	1.88479	2.67485	4.07527
NM_173465	4.74141	5.00394	0.000861712	COL23A1	1.32319	1.00994	6.87809	1.3659
NM_173475	0.893608	7.763	0.371768	DCUN1D3	7.08451	7.39536	6.44353	8.90074
NM_173479	1.39675	3.09701	0.26553	WDR88	2.58949	1.56479	4.1267	2.60739
NM_173485	4.93167	4.85407	0.000726937	TSHZ2	1.13218	0.468996	6.73097	1.17484
NM_173496	2.38431	3.86645	0.0490219	MPP7	2.53903	1.66368	5.38183	2.33008
NM_173508	5.19135	4.72308	0.000557347	SLC35F3	1.06244	-0.622561	6.59884	1.24138
NM_173515	1.43919	7.15111	0.148871	CNKSR3	6.74521	5.51985	6.33722	8.38597
NM_173516	1.42376	1.88557	0.409614	PNLDC1	1.68984	-1.18566	2.71565	1.68561
NM_173519	3.49691	3.7338	0.0120202	CLVS1	1.13218	0.932727	5.45143	1.17484
NM_173538	4.46915	4.10334	0.00175998	CNBD1	0.911961	-0.0523592	5.90614	1.3659
NM_173550	0.756411	5.42633	0.366336	CCDC171	5.14541	4.81484	6.05865	5.34414
NM_173554	1.29985	2.91391	0.324219	C10orf107	2.58949	1.15298	3.94559	2.2676
NM_173556	2.68487	2.64117	0.0771705	CCDC83	0.553729	0.672688	4.09225	1.30498
NM_173575	1.43724	3.60289	0.297996	STK32C	0.743935	3.43688	4.98695	1.03178
NM_173588	2.60217	2.66026	0.0805017	IGSF22	0.743935	0.672688	4.08838	1.42435
NM_173591	1.59356	3.84801	0.151458	OTOGL	3.23758	2.14653	5.05213	3.09507
NM_173628	2.58177	3.92378	0.0538758	DNAH17	1.26229	2.55995	5.56465	1.10509
NM_173648	3.09871	3.63673	0.0221148	CCDC141	1.82232	0.468996	5.27496	1.68561
NM_173653	1.37662	6.19294	0.140944	SLC9A9	5.77166	4.71461	7.24335	5.86831
NM_173666	0.618849	4.64288	0.491044	DTWD2	4.75571	3.59559	4.90552	4.9103
NM_173681	2.08497	1.99625	0.199037	ATG9B	0.651965	0.231742	3.07837	1.637
NM_174887	1.1194	2.72483	0.388386	IFT20	1.7795	2.24563	2.66446	3.51377
NM_174908	0.789919	9.31451	0.454311	CCDC50	9.3477	8.13854	7.76465	10.4474
NM_174912	1.69704	3.80425	0.143984	FAAH2	2.25631	2.98018	5.14094	2.50277
NM_174920	1.26348	2.80024	0.32485	SAMD14	1.73537	2.21335	3.09393	3.40186
NM_174952	1.40064	5.14694	0.132709	STPG2	4.13776	4.37847	6.35105	4.29481
NM_175058	1.90153	4.92903	0.0761949	PLEKHA7	3.03403	4.08927	6.40506	3.21582
NM_175607	4.3496	4.69683	0.0021935	CNTN4	1.90434	-0.0523592	6.53187	1.58671
NM_175611	0.82418	5.03631	0.34258	GRIK1	4.69939	4.38573	5.86252	4.62893
NM_175710	1.61381	2.92033	0.235892	CR1L	2.34709	0.932727	4.1267	1.94716
NM_175733	2.09893	3.9612	0.0658399	SYT9	2.95925	1.84319	5.35625	2.92332
NM_175861	2.17698	4.62805	0.0364364	TMTC1	3.58711	2.45341	6.0407	3.71449
NM_175888	1.80357	2.09256	0.244656	ZNF620	0.911961	0.851147	2.06606	3.11295
NM_175911	2.71754	2.6184	0.0810421	OR2L13	1.13218	-0.406476	4.08449	1.17484
NM_175929	1.38904	5.50584	0.127101	FGF14	5.19105	3.72718	6.50156	5.30967
NM_176822	1.68538	2.57126	0.222167	NLRP14	1.82232	0.851147	3.36156	2.77398
NM_176877	1.15699	5.15255	0.19411	INADL	4.64675	4.20871	6.17478	4.62893
NM_177417	1.22722	4.52511	0.230349	KLC3	3.01569	4.2411	5.71183	3.41633
NM_177531	1.23517	3.73695	0.278425	PKHD1L1	3.57464	1.80037	4.79324	3.07697
NM_178019	1.33966	2.7279	0.3273	CATSPER3	1.38163	2.14653	3.81555	1.86513
NM_178130	1.12034	2.40823	0.447029	NME9	1.26229	1.92521	3.4367	1.3659
NM_178140	1.41205	5.35999	0.114418	PDZD2	3.76228	4.94833	6.33722	5.22177
NM_178499	1.78202	4.2755	0.157033	CCDC60	1.54395	3.80506	5.76626	1.8223
NM_178539	1.58813	4.72099	0.103711	FAM19A2	4.01392	3.27426	5.9655	3.91125
NM_178550	1.48532	2.30518	0.337406	C1orf110	0.553729	1.7107	3.4788	1.03178
NM_178815	1.41642	5.21443	0.151151	ARL5B	4.60444	4.01629	3.87979	6.54653
NM_178826	0.930829	5.02392	0.320958	ANO4	4.01392	4.80945	6.08127	4.03832
NM_178827	1.03156	2.80437	0.43365	IQUB	2.28721	1.92521	3.77751	1.98649
NM_178834	1.27386	1.51352	0.454547	LAYN	1.13218	-0.21858	2.08175	1.637
NM_178844	1.54773	2.7803	0.272782	NLRC3	1.1987	2.07646	4.03295	1.3659
NM_178857	2.29968	2.8207	0.104787	RP1L1	1.43779	0.764675	4.21474	1.58671
NM_181359	1.56445	3.63158	0.17849	IL6R	2.4325	2.72933	4.87657	2.60739
NM_181482	0.827071	5.91833	0.369366	LDLRAD4	5.17462	5.65819	6.9256	4.99951
NM_181501	0.822215	4.12912	0.410328	ITGA1	3.96698	3.19381	4.96173	3.65471
NM_181509	1.32056	1.7945	0.427718	MAP1LC3A	0.553729	1.08323	2.68516	1.30498
NM_181645	2.42768	2.55978	0.102929	CCDC67	0.743935	0.764675	3.92834	1.48052
NM_181646	4.46333	3.93705	0.0020356	ZNF804B	0.743935	-0.21858	5.72938	1.24138
NM_181807	2.51894	2.36418	0.114405	DCDC1	0.334582	0.574434	3.76298	1.03178
NM_181808	0.72052	4.42433	0.48957	POLN	3.25331	4.47694	5.47241	2.98287
NM_182496	1.03578	3.43881	0.394	CCDC38	3.23758	2.07646	4.53564	2.23531
NM_182543	0.603589	5.02485	0.477243	NSUN6	4.46275	4.86765	5.64607	4.79319
NM_182553	1.24003	1.61458	0.463111	CNIH2	0.448313	0.932727	2.43935	1.17484
NM_182575	1.76712	1.3248	0.317757	IZUMO1	0.0760793	-0.0523592	2.08175	1.3659
NM_182626	1.52818	3.77355	0.209881	C2orf48	1.82232	3.32046	5.12209	2.02477
NM_182685	2.36851	6.57787	0.0133157	EFNA1	4.53534	5.27595	6.41903	7.87189
NM_182708	1.77299	4.87375	0.0847545	EBF1	3.31459	4.0069	6.27971	3.47281
NM_182763	1.04374	4.74264	0.254255	MCL1	4.34287	3.86863	4.22537	5.73611
NM_182848	1.38639	3.59872	0.240912	CLDN10	2.45988	2.88091	4.83319	2.33008
NM_182899	1.49734	8.15559	0.142197	CREB5	7.79162	6.26183	7.49629	9.36998
NM_182920	0.774298	7.74078	0.396833	ADAMTS9	6.55836	7.78884	8.02878	8.12028
NM_182935	1.27924	3.64124	0.296109	MOBP	3.69474	0.574434	3.4669	4.58477
NM_182962	6.54682	5.12939	2.10203e-08	BIRC3	-0.0729108	-0.876811	5.01787	6.72426
NM_182978	2.07418	4.04456	0.0643358	GNAL	2.63824	2.5854	5.46196	2.8612
NM_183061	1.03342	3.76122	0.339688	SLC9C1	3.49747	2.5854	4.71992	3.1653
NM_183239	0.880092	2.86491	0.489227	GSTO2	2.4325	2.14653	3.60362	2.55603
NM_183387	1.76468	3.57096	0.144532	EML5	2.77533	1.80037	4.89445	2.38997
NM_198057	1.33933	3.63598	0.237248	TSC22D3	2.83928	2.68293	4.77163	2.79629
NM_198098	1.27726	1.81336	0.4427	AQP1	0.553729	1.15298	2.77477	1.03178
NM_198123	3.06957	5.59327	0.0205518	CSMD3	2.34709	3.91955	7.37017	2.02477
NM_198152	2.41525	2.87486	0.0703182	UTS2B	1.68984	0.231742	3.84803	3.1653
NM_198182	1.0516	2.61388	0.447435	GRHL1	2.34709	1.2831	3.4788	2.13388
NM_198184	2.7637	1.72008	0.123347	OSTN	0.211113	-1.57916	2.85001	1.48052
NM_198277	1.19048	2.38922	0.429187	SLC37A2	1.13218	1.88479	3.47286	1.17484
NM_198516	2.7819	4.90881	0.0261089	GALNT18	2.12564	3.39431	6.61847	1.94716
NM_198529	1.61523	3.86257	0.156112	EFCAB5	2.73106	2.8392	5.18883	2.50277
NM_198546	1.88482	2.92043	0.184383	SPATA21	0.989162	2.00282	4.30441	1.17484
NM_198578	1.03901	3.03141	0.415076	LRRK2	3.01569	1.15298	3.73844	2.96329
NM_198584	1.80167	3.08903	0.146054	CA13	1.06244	2.39703	3.68806	3.66687
NM_198850	0.889202	2.98171	0.484113	PHLDB3	2.15943	2.61041	3.88874	2.23531
NM_198856	2.33336	4.5623	0.0304524	EFCAB6	3.15622	2.65916	6.07932	3.1653
NM_198965	1.89423	1.49627	0.284369	PTHLH	-0.239078	0.355241	2.36434	1.42435
NM_198989	2.23675	3.19457	0.103225	DLEU7	2.37613	-0.21858	4.50687	2.50277
NM_198995	0.952703	5.63583	0.295316	CCDC178	5.75242	3.76107	5.96973	6.08536
NM_199000	3.9864	4.98472	0.00239983	LHFPL3	1.86391	1.88479	6.80847	1.90673
NM_199261	1.01796	3.25972	0.406734	TPTE	2.66201	2.53404	4.30441	2.23531
NM_199451	1.51487	4.65975	0.135712	ZNF365	3.78411	3.57032	5.97814	3.34247
NM_199454	4.54537	4.71994	0.00148531	PRDM16	1.1987	0.932727	6.57893	1.03178
NM_201435	1.10761	2.76622	0.402757	CCDC62	2.15943	1.88479	3.70336	2.16849
NM_201593	2.24841	4.63367	0.0416072	CACNB2	3.05213	3.09095	6.18117	2.83988
NM_201628	2.84928	5.34357	0.0167778	KAZN	3.17287	3.37984	7.06042	2.65698
NM_203281	0.781814	8.52633	0.473821	BMX	8.49542	7.50445	6.43286	9.72511
NM_203285	0.900409	4.23255	0.39455	PVRL1	3.13939	4.07136	5.32692	2.92332
NM_203315	1.3761	3.5858	0.272577	BDH1	2.53903	2.79625	4.9274	1.3659
NM_203349	2.70211	3.74536	0.0355044	SHC4	2.15943	1.21951	5.34003	1.8223
NM_203379	1.33451	2.99887	0.299044	ACSL5	1.73537	2.39703	4.09612	2.16849
NM_203464	1.91578	3.15815	0.151243	AK4	1.82232	1.80037	4.55264	1.53459
NM_206808	1.09462	4.06633	0.305897	CLYBL	3.07001	3.63268	5.19064	2.96329
NM_206933	3.82728	4.75329	0.00531527	USH2A	2.28721	1.00994	6.56922	1.3659
NM_206996	2.36574	3.82382	0.0590548	SPAG17	2.22473	2.04011	5.38183	1.77816
NM_207299	2.52032	4.18008	0.0379617	LPPR1	2.15943	2.55995	5.78675	2.02477
NM_207303	3.79457	4.72292	0.00361382	ATRNL1	2.25631	1.08323	6.51246	2.02477
NM_207311	2.56386	3.16006	0.0566154	CCDC64	0.911961	1.56479	4.62672	1.90673
NM_207359	2.26304	3.82417	0.05561	GADL1	2.79696	1.2831	5.21752	2.94344
NM_207371	2.80144	2.21901	0.0886636	SKIDA1	0.651965	-0.406476	1.53858	3.72615
NM_207372	2.93828	3.5029	0.026399	SH2D4B	1.13218	1.45862	5.08364	1.90673
NM_207414	2.06306	3.47197	0.119918	MROH5	2.92036	-0.622561	4.62939	3.24854
NM_207437	3.0555	3.98652	0.0211914	DNAH10	1.59424	1.80037	5.68254	1.30498
NM_207627	1.0896	5.2277	0.197467	ABCG1	4.0683	4.94833	5.57161	5.75046
NM_212481	1.35532	5.94935	0.175505	ARID5A	5.18286	5.05238	4.4656	7.2837
NM_213569	1.99535	4.93091	0.0444234	NEBL	3.56206	3.60806	6.34049	3.85923

## Sheet: 0_vs_30_min_TNFa_downegulated
RefSeq	Log2_FC	logCPM	Pval	Symbol	0.rep1	0.rep2	30.rep2	30.rep1
NM_000107	-0.799887	5.27324	0.349878	DDB2	5.07632	6.01027	4.41074	5.13693
NM_000113	-0.798253	3.51326	0.467291	TOR1A	3.17287	4.30377	3.21272	2.8612
NM_000202	-0.724907	4.49537	0.426044	IDS	4.31315	5.17898	3.81085	4.31812
NM_000210	-0.787897	7.7629	0.4201	ITGA6	8.11863	8.08936	5.83501	8.032
NM_000222	-2.15752	6.1757	0.0401662	KIT	4.82579	7.70061	4.48638	4.93563
NM_000232	-0.753635	3.55014	0.493345	SGCB	4.25181	3.36522	2.56748	3.52716
NM_000252	-0.603662	6.04426	0.488528	MTM1	6.39774	6.22587	5.09335	6.14306
NM_000268	-1.07661	6.13528	0.244016	NF2	5.49887	7.1836	5.63015	5.35169
NM_000270	-0.766764	4.56448	0.398888	PNP	5.01304	4.77115	3.43059	4.60386
NM_000332	-0.770921	8.82798	0.409443	ATXN1	8.97236	9.33063	7.60718	8.8972
NM_000380	-0.793229	5.96234	0.424847	XPA	6.85885	5.39946	3.89763	6.25801
NM_000386	-0.734045	5.06603	0.395594	BLMH	5.45872	5.3107	3.94559	5.12816
NM_000428	-1.38196	7.83525	0.166904	LTBP2	6.7904	9.10176	7.13893	6.81171
NM_000442	-0.826206	8.20829	0.407018	PECAM1	8.21016	8.84681	6.22511	8.45944
NM_000534	-0.65286	5.9444	0.458053	PMS1	6.24872	6.21979	4.71992	6.11893
NM_000538	-1.62215	2.89122	0.197474	RFXAP	3.49747	3.46457	1.89896	1.8223
NM_000552	-0.936731	9.71765	0.363911	VWF	9.52748	10.5259	7.51447	9.92638
NM_000660	-0.919952	4.71632	0.304271	TGFB1	4.34287	5.59695	4.02485	4.32581
NM_000671	-1.81062	3.79988	0.0987823	ADH5	4.97083	3.59559	2.00152	3.07697
NM_000714	-1.17183	4.0879	0.259454	TSPO	3.3589	5.1956	3.72351	2.92332
NM_000754	-0.802733	5.3783	0.367434	COMT	5.02683	6.19314	4.17505	5.41432
NM_000788	-0.900486	4.37602	0.341224	DCK	4.82052	4.69136	3.11696	4.34863
NM_000820	-1.17449	5.09988	0.19815	GAS6	4.56716	6.15752	3.8753	4.78206
NM_000875	-1.36064	8.80314	0.160842	IGF1R	8.50531	9.84974	7.32638	8.41103
NM_000918	-0.684856	5.2918	0.424466	P4HB	4.86728	6.07234	4.70226	5.08805
NM_000932	-0.765546	4.06937	0.439975	PLCB3	3.72891	4.84676	3.84343	3.37247
NM_000945	-0.776045	6.8519	0.414168	PPP3R1	7.28439	7.08668	5.0361	7.10539
NM_001001329	-0.820061	3.72288	0.443737	PRKCSH	3.17287	4.61309	3.42445	3.04006
NM_001001396	-0.608052	6.31909	0.499302	ATP2B4	5.71313	7.13164	5.8817	6.07628
NM_001001419	-0.917144	6.04852	0.306822	SMAD5	6.60968	6.23796	4.65846	6.05563
NM_001001438	-0.686372	6.06598	0.437727	LSS	6.11518	6.58408	5.01378	6.13871
NM_001001521	-0.788967	5.46361	0.345298	UGP2	5.74965	5.85675	4.52707	5.3815
NM_001001555	-0.677652	9.19101	0.480215	GRB10	8.99768	9.8571	7.85161	9.38478
NM_001001556	-0.643643	7.15177	0.471124	GALK2	7.36445	7.50778	6.14801	7.23962
NM_001001662	-0.691865	4.90379	0.444839	ZNF782	5.22337	5.1956	3.4367	5.13255
NM_001001664	-0.687992	5.84077	0.437712	SPOPL	6.33443	5.92562	4.48933	6.03232
NM_001001894	-0.794411	7.80188	0.402054	TTC3	7.96048	8.30911	6.23216	7.97387
NM_001001925	-0.715074	8.1696	0.436808	MTUS1	8.57974	8.37991	7.06437	8.23953
NM_001001937	-1.32439	3.32375	0.247354	ATP5A1	3.54937	4.07136	2.54501	2.47539
NM_001001973	-0.897267	5.25026	0.288182	ATP5C1	5.79872	5.43839	4.2076	5.11934
NM_001002010	-0.696535	5.3147	0.407035	NT5C3A	5.60998	5.63095	4.40763	5.30579
NM_001002020	-0.724758	3.97605	0.476971	PUS1	3.44362	4.80945	3.88427	3.13062
NM_001002030	-0.677885	5.97123	0.457616	ECHDC1	6.59432	5.85414	4.50978	6.20689
NM_001002031	-0.711249	4.0639	0.462479	ATP5G2	4.32064	4.42149	3.40587	3.88026
NM_001002295	-1.15525	4.30144	0.224819	GATA3	4.65862	4.86765	3.01439	4.03832
NM_001002909	-0.932338	6.06179	0.298415	GPATCH8	5.94396	6.83013	4.89223	5.96008
NM_001002919	-0.991994	2.95612	0.427068	FAM150B	3.67151	2.98018	1.74978	2.81825
NM_001003786	-0.894511	4.76594	0.312661	STRADA	4.45597	5.6063	4.08059	4.4005
NM_001003800	-0.987124	5.20289	0.244682	BICD2	5.06745	6.00557	4.68695	4.55891
NM_001003810	-0.677402	6.2946	0.469469	HNRNPD	6.71854	6.45886	4.64532	6.58387
NM_001003828	-0.703296	6.93257	0.452386	PARVB	6.06257	7.88035	6.74829	6.28979
NM_001003891	-0.650645	6.51543	0.469413	MED15	5.95603	7.33381	6.00204	6.28979
NM_001005332	-0.83381	5.68573	0.322198	MAGED1	5.69308	6.32363	4.83782	5.50513
NM_001005404	-0.757101	6.84913	0.419036	YPEL2	6.54723	7.6167	5.46196	6.99402
NM_001005745	-0.650863	7.84296	0.482085	NUMB	7.888	8.34075	6.63385	8.01189
NM_001005851	-0.670527	4.75614	0.441741	ZNF780B	4.97558	5.12359	3.86173	4.7652
NM_001005861	-0.64859	6.9273	0.467885	RYK	7.10742	7.31587	5.85911	7.04031
NM_001006115	-0.749903	5.22023	0.375449	IP6K1	5.17048	5.84363	4.38251	5.11934
NM_001006634	-0.642697	7.26954	0.477003	ARHGAP17	7.34439	7.73939	6.20375	7.38651
NM_001007214	-0.871613	3.56865	0.439242	CACYBP	4.40053	3.25852	2.28522	3.57954
NM_001007225	-0.647145	9.27409	0.496278	IGF2BP2	9.35296	9.74406	7.92168	9.49733
NM_001007253	-0.846362	7.03812	0.359701	ERV3-1	7.14691	7.61593	5.57439	7.13304
NM_001007464	-0.693663	4.0947	0.481695	RWDD1	4.77764	3.87896	3.28906	4.02893
NM_001007466	-0.62389	7.30996	0.493559	TULP4	7.33425	7.8045	6.19296	7.46518
NM_001008388	-1.16617	3.31417	0.31737	CISD2	3.96698	3.57032	2.06606	3.02125
NM_001008495	-0.751302	4.62338	0.430853	TMEM64	5.2859	4.51717	3.01439	4.8476
NM_001008744	-0.807273	6.12311	0.349859	TDP1	6.17835	6.71235	5.56325	5.75616
NM_001009955	-1.25988	7.25644	0.214057	SSBP3	6.0149	8.51806	6.85659	6.00386
NM_001009993	-0.841936	5.47065	0.333667	FAM168B	5.48561	6.11009	4.18598	5.50513
NM_001009999	-0.627406	6.53856	0.480365	KDM1A	6.71286	6.91664	5.47241	6.66943
NM_001010844	-1.15241	3.76742	0.275953	IRAK1BP1	4.52241	3.86863	2.41477	3.54044
NM_001010846	-1.52483	4.95622	0.0946125	SHE	5.66395	5.37778	2.97292	4.60386
NM_001010848	-0.946835	10.7317	0.356901	NRG3	10.8227	11.3813	8.4657	10.944
NM_001010935	-0.891577	6.57167	0.325499	RAP1A	6.94373	6.9562	5.14655	6.61401
NM_001010989	-0.924991	4.99965	0.324384	HERPUD1	5.5539	5.20794	3.03066	5.17573
NM_001011537	-0.730672	4.50714	0.414482	FYTTD1	4.61666	5.00601	3.74338	4.3785
NM_001011655	-0.911603	7.24364	0.317893	TMEM44	7.01814	8.05618	6.22246	7.08515
NM_001011713	-0.877488	5.67568	0.35713	NAA30	6.50678	5.37778	3.70843	5.88662
NM_001011885	-0.752655	5.7122	0.383757	BTBD1	6.06033	6.01964	4.47455	5.80648
NM_001012241	-0.63165	4.94466	0.457507	MSL1	4.91257	5.47969	4.33092	4.8152
NM_001012329	-0.810598	4.89748	0.399063	CTNNBIP1	3.858	5.93308	4.90331	3.71449
NM_001012398	-0.889703	3.3839	0.44186	AKTIP	3.75124	3.7722	2.08175	3.38724
NM_001012506	-0.934011	5.52214	0.268166	CCDC66	5.62215	6.15752	4.50396	5.34035
NM_001012614	-0.834054	5.14101	0.358176	CTBP1	4.27512	6.14688	4.81218	4.49216
NM_001012727	-0.781916	4.05341	0.43549	AGPAT2	3.77324	4.82021	3.21272	3.92143
NM_001013693	-0.804705	4.28701	0.414308	LDLRAD2	3.89859	5.11924	3.07837	4.32581
NM_001014283	-0.918683	5.23227	0.277488	DCUN1D2	5.16634	5.96251	4.41385	4.94065
NM_001014431	-0.957344	4.26067	0.345012	AKT1	3.32951	5.33341	4.00852	3.29627
NM_001017408	-0.657086	5.60929	0.46381	GOPC	6.21497	5.49991	4.14549	5.86304
NM_001017423	-0.734538	4.96715	0.386293	ALDH18A1	5.06745	5.4763	4.25682	4.79873
NM_001017974	-0.694347	4.10839	0.494414	P4HA2	3.63594	4.89844	4.23242	2.8612
NM_001018009	-1.52275	6.31443	0.128815	SH3BP5	5.17462	7.64345	5.69024	4.9306
NM_001018068	-0.635276	5.94684	0.474048	SERBP1	6.42231	6.00792	4.69208	6.14741
NM_001024611	-0.966907	2.58439	0.47166	LRRC66	2.81827	3.12605	1.66897	2.29918
NM_001024843	-0.621167	7.29185	0.485947	TNRC6B	7.14901	7.89379	6.58376	7.23861
NM_001025205	-0.913741	3.8912	0.359868	AP2M1	4.30562	4.2411	3.07053	3.60504
NM_001025616	-0.645779	10.4636	0.486824	ARHGAP24	10.686	10.8125	9.46444	10.5469
NM_001030060	-1.54249	5.74081	0.138801	SAMD5	4.05938	7.15414	5.23342	4.08436
NM_001031681	-0.725309	4.81666	0.414648	CTNS	4.36476	5.6279	4.43843	4.37109
NM_001031721	-0.902693	2.60581	0.499296	ZNF613	3.10512	2.81789	2.14287	1.98649
NM_001031733	-0.947092	3.54791	0.394475	CALML4	3.03403	4.48372	3.26863	2.6324
NM_001031855	-0.628902	4.57225	0.494196	LONRF3	5.18696	4.41441	3.53688	4.68977
NM_001032296	-0.853989	7.26656	0.341256	STK24	7.25441	7.92962	6.3125	7.12865
NM_001033057	-1.13186	10.1035	0.260006	MAGI1	10.1839	10.8601	8.0232	10.1279
NM_001033519	-0.810796	4.63845	0.357058	WIPI2	4.55451	5.31451	4.14922	4.19762
NM_001033521	-0.893175	3.43564	0.430577	CSTF1	4.17128	3.33553	2.2716	3.37247
NM_001033561	-0.66243	4.55218	0.462661	PHF12	4.79387	4.89335	3.60362	4.59752
NM_001035534	-0.958029	6.48853	0.293414	FAM129B	5.94153	7.45526	6.05368	5.79545
NM_001037131	-0.725018	7.97889	0.445354	AGAP1	7.21779	8.90577	7.82417	7.26283
NM_001037174	-1.07621	6.21451	0.27741	ARL5A	7.09328	6.0243	4.0289	6.31125
NM_001037582	-0.736158	7.31492	0.408332	SCD5	7.29108	7.91464	6.53115	7.19415
NM_001038618	-0.648761	4.50321	0.48191	NARF	4.11211	5.24833	3.73844	4.4576
NM_001039349	-0.750356	10.8205	0.455256	EFEMP1	11.4973	10.6848	8.98245	11.0976
NM_001039355	-0.780835	3.8075	0.4535	SLC25A29	3.67151	4.49719	2.98131	3.66687
NM_001039467	-1.21511	2.72355	0.360384	RGS19	2.28721	3.74986	2.01793	1.94716
NM_001039469	-0.646123	5.30349	0.458111	MARK2	4.78307	6.09909	5.25607	4.53258
NM_001039690	-0.750456	4.03415	0.451938	CHTF8	4.39344	4.32659	2.93022	4.07527
NM_001039697	-1.03512	5.21717	0.237193	SNAPC3	5.65509	5.63401	3.73348	5.1543
NM_001039841	-0.739286	3.74815	0.492096	ARHGAP11B	4.31315	3.78324	2.31208	3.93154
NM_001040285	-0.745395	4.891	0.383256	PAPD5	4.76672	5.55247	4.50396	4.42933
NM_001040427	-0.842774	3.44718	0.450353	HAGH	3.41593	4.08927	3.36156	2.36034
NM_001040440	-0.796254	4.85313	0.39128	CCDC112	5.661	4.51054	3.47286	4.96547
NM_001040613	-1.2649	1.71264	0.460424	TMEM70	2.63824	1.61509	-0.324826	1.637
NM_001042368	-0.81673	5.14953	0.358218	RALGDS	4.43543	6.1035	4.7149	4.64745
NM_001042414	-0.642285	7.09029	0.498916	PSPC1	7.35628	7.39626	5.39445	7.41742
NM_001042422	-1.01511	3.63328	0.358949	SLC16A3	3.12235	4.60066	3.33561	2.6324
NM_001042424	-0.61975	6.74854	0.484804	WHSC1	6.83813	7.19087	5.75407	6.85352
NM_001042473	-0.756146	4.33631	0.424565	ACBD5	4.83627	4.47012	3.23394	4.37109
NM_001042681	-0.79584	9.21149	0.410039	RERE	9.3509	9.73432	7.59732	9.39486
NM_001043318	-0.902744	6.09385	0.309211	ELMSAN1	5.85395	6.90784	5.36268	5.75616
NM_001047	-0.730148	4.36043	0.425393	SRD5A1	4.47623	4.85201	3.7285	4.13774
NM_001067	-0.761069	4.28583	0.445697	TOP2A	4.98032	4.13307	2.80345	4.46458
NM_001071775	-1.11258	3.52257	0.320264	MZT1	4.42852	3.30522	2.31208	3.26463
NM_001076785	-0.819104	5.50462	0.341141	SLC7A6	5.09827	6.34985	4.77646	5.25838
NM_001077183	-0.68216	4.76833	0.438715	TSC2	4.40053	5.51985	4.28421	4.47844
NM_001077195	-0.962095	2.82635	0.450196	ZNF436	3.45727	2.94129	1.89896	2.55603
NM_001077269	-0.947162	6.87051	0.290962	WIPF1	7.04438	7.46128	5.6421	6.78128
NM_001077395	-0.768997	4.87698	0.368423	DPH5	5.25497	5.16216	4.05299	4.74814
NM_001077397	-1.61324	2.39891	0.296596	IRF2BP2	3.31459	2.61041	-0.500627	2.20229
NM_001077427	-1.38878	5.64833	0.122255	LYPD1	6.55201	5.68493	3.90206	5.34414
NM_001079514	-0.79963	5.68378	0.34895	UBN1	5.8591	6.18067	4.56106	5.68623
NM_001079669	-0.857486	5.9875	0.325705	TMTC4	6.17423	6.51292	4.83319	5.95016
NM_001079685	-0.719708	4.55521	0.420357	KIAA1191	4.68206	5.03401	3.73844	4.47152
NM_001080383	-0.846653	3.76963	0.424794	GJC1	3.48419	4.57548	2.72567	3.69087
NM_001080432	-0.640365	8.24771	0.489314	FTO	8.48171	8.58188	7.11243	8.39604
NM_001080437	-0.954951	6.28699	0.294293	SNED1	5.71881	7.25967	5.77715	5.68324
NM_001080454	-1.89047	3.17411	0.163533	ACSM4	1.59424	4.66175	2.45148	1.10509
NM_001080826	-1.26139	7.17145	0.173412	SGK223	7.44373	7.86355	5.49016	6.96478
NM_001081492	-0.902019	4.67422	0.319575	KRT80	4.3575	5.51654	4.4656	3.73772
NM_001082538	-0.826993	3.61167	0.4493	TCTN1	3.08767	4.49719	3.18393	3.07697
NM_001083335	-0.944662	4.7506	0.312083	ZNF112	5.5977	4.49047	3.28228	4.7652
NM_001083914	-1.41518	8.60506	0.150314	CTBP2	8.1046	9.74424	7.11815	8.15952
NM_001085471	-0.740957	7.98762	0.41009	FOXN3	7.85164	8.65845	7.47602	7.65792
NM_001097600	-0.744438	4.49692	0.418707	SLC35G2	4.69364	4.93849	3.38704	4.54581
NM_001098426	-0.829652	3.78038	0.417007	SMARCD2	3.71761	4.44948	3.28906	3.31184
NM_001098525	-0.814412	4.18042	0.427437	CKAP2	4.92245	3.99745	2.56748	4.35615
NM_001098625	-0.869518	4.35261	0.373545	JKAMP	5.11559	4.18394	2.93886	4.41499
NM_001098801	-0.833172	5.39365	0.318569	FAM210A	5.60078	5.88521	4.55264	5.20936
NM_001098811	-0.735233	4.45847	0.427046	2008-09-01	4.08598	5.23633	4.28421	3.73772
NM_001098832	-0.906057	3.98586	0.365147	FAM104A	4.29045	4.44254	2.84082	3.90099
NM_001099220	-0.662834	4.72691	0.444373	ZNF862	5.12417	4.90351	4.049	4.61017
NM_001099270	-0.918667	3.66317	0.384962	ZBTB34	3.98594	4.10695	2.75533	3.43066
NM_001099289	-1.23491	8.66456	0.226563	SH3RF3	7.41166	9.92003	8.01607	7.81431
NM_001099650	-0.888018	5.36887	0.314655	GXYLT1	5.90215	5.5717	3.84803	5.44993
NM_001100594	-1.20785	8.59413	0.22056	SNRK	8.8301	9.285	6.53614	8.54836
NM_001100603	-0.622732	4.65168	0.492518	KDELR2	4.44916	5.28762	3.75321	4.70753
NM_001100626	-0.936069	3.98058	0.342378	ERLIN1	4.50936	4.21688	3.21272	3.63009
NM_001101802	-0.725445	7.89375	0.456411	PHF21A	8.1573	8.26402	6.0477	8.19248
NM_001102396	-0.850776	3.05871	0.493087	SIKE1	3.76228	2.98018	1.6268	3.14806
NM_001105570	-0.91217	4.102	0.349851	NUDT19	4.19591	4.72609	3.20557	3.86978
NM_001106	-0.915636	3.7178	0.387791	ACVR2B	3.48419	4.53033	2.97292	3.37247
NM_001110556	-0.671225	6.67757	0.451291	FLNA	6.36914	7.39895	5.93451	6.59664
NM_001111101	-0.734198	5.49871	0.395534	CNRIP1	6.01721	5.59068	4.28421	5.60011
NM_001112	-0.763148	7.68902	0.41975	ADARB1	7.90117	8.13154	6.11407	7.88821
NM_001113407	-1.07244	4.194	0.258179	LDB1	4.30562	4.89335	3.54822	3.56663
NM_001114093	-0.715916	6.27712	0.423406	LSM14A	6.42057	6.74377	5.09722	6.37932
NM_001114176	-0.639279	6.05269	0.464311	AEBP2	6.28553	6.38651	5.07583	6.13214
NM_001114617	-0.964366	4.63468	0.275238	MGAT1	5.09827	4.97265	3.64117	4.40777
NM_001114634	-0.81934	5.50774	0.327485	PLAG1	5.82528	5.89287	4.54417	5.41071
NM_001114753	-1.14135	6.19471	0.204691	ENG	5.87952	7.15626	5.48132	5.54519
NM_001115016	-0.747844	5.73139	0.382471	KANSL3	5.88962	6.20755	4.60787	5.78154
NM_001122779	-1.06177	6.5584	0.27091	FAM124B	7.31938	6.57458	4.53279	6.63117
NM_001122823	-0.849548	4.57395	0.337517	GTF3C5	4.56716	5.22423	4.15294	4.00997
NM_001122835	-0.893709	5.72157	0.303918	TTC13	5.77712	6.36463	4.44755	5.70403
NM_001122898	-0.651502	5.45675	0.445662	CD99	5.2073	6.13616	4.61058	5.45694
NM_001122962	-0.738144	4.11409	0.487766	SIRPB2	4.67039	4.16718	2.01793	4.46458
NM_001124	-1.11378	3.00239	0.410458	ADM	3.83727	2.96087	0.380916	3.1653
NM_001127208	-0.926283	5.33718	0.348919	TET2	6.03325	5.34463	2.81288	5.61273
NM_001127266	-1.10336	2.8178	0.388227	TMEM129	2.53903	3.72718	2.32532	1.94716
NM_001127603	-0.714363	5.45423	0.457103	NMRK1	6.15341	5.24434	3.38072	5.81196
NM_001127662	-0.636733	6.12307	0.467379	GSN	6.1927	6.59195	5.26984	6.14089
NM_001128224	-0.732256	8.10581	0.44957	TMCC1	8.33139	8.51517	6.37513	8.37165
NM_001128592	-0.945447	2.94377	0.462973	PSMG4	1.98194	4.0069	2.61139	2.09842
NM_001128919	-0.726304	6.78369	0.418721	MARK3	6.48695	7.53089	5.92475	6.71843
NM_001129778	-1.55757	5.514	0.0848787	GRAPL	4.95167	6.72098	4.50396	4.56542
NM_001129995	-1.33115	4.40834	0.170163	KCTD15	3.84768	5.53299	3.66741	3.51377
NM_001130007	-0.689106	5.80825	0.415305	GSPT1	5.80941	6.36095	4.97018	5.7675
NM_001130060	-0.778335	6.41855	0.37926	ATF7	6.42925	7.02175	5.41318	6.383
NM_001130081	-0.763602	8.68047	0.423565	PLD1	8.66529	9.29202	7.25724	8.83123
NM_001130158	-1.39626	7.39129	0.150374	MYO1B	6.71428	8.57634	6.05865	6.88638
NM_001130410	-1.03177	3.3832	0.356745	ACAA1	3.54937	4.01629	2.74551	2.79629
NM_001130519	-0.622915	5.13948	0.487738	ZNF195	5.51201	5.31831	3.65173	5.42867
NM_001130524	-0.743344	5.39098	0.390798	AP1M1	4.86728	6.24197	5.0719	4.85824
NM_001130720	-0.658367	6.16364	0.451314	AHCYL2	5.93179	6.83677	5.77955	5.81196
NM_001130725	-0.676014	3.98422	0.491747	PSMB5	3.94777	4.54338	3.57064	3.63009
NM_001130841	-0.771791	5.28704	0.374044	RTCA	5.79604	5.42436	4.00852	5.3815
NM_001130912	-1.04338	5.50503	0.224453	SUGT1	5.94638	5.92313	4.14175	5.38519
NM_001130929	-0.932825	2.97801	0.44307	C7orf73	2.93993	3.6807	2.48727	2.36034
NM_001130976	-0.9103	8.4531	0.329832	DYSF	8.03519	9.35001	7.76708	8.0714
NM_001131026	-0.67639	4.05001	0.489787	PEX5	4.36476	4.32659	3.26176	3.99076
NM_001134225	-0.830225	6.85994	0.359057	INPP4A	6.34181	7.75559	6.41284	6.35698
NM_001134232	-1.06852	4.22496	0.277648	TMEM106B	5.05404	4.12441	2.92152	4.05692
NM_001134296	-0.687676	4.83772	0.466893	AP3M2	5.49225	4.67959	3.18393	5.12376
NM_001134335	-0.676846	4.02552	0.494737	EIF2AK1	4.02313	4.56912	3.21272	3.98106
NM_001134479	-0.728763	7.15596	0.41946	LRRC8D	7.38155	7.56247	5.9917	7.23962
NM_001134647	-0.916216	8.02093	0.322562	AFAP1	7.65393	8.89976	7.27227	7.68132
NM_001135055	-1.02992	5.80235	0.222274	TKT	5.74409	6.58723	5.09722	5.29016
NM_001135247	-1.94939	2.95366	0.13685	MFAP2	2.63824	4.20871	1.17882	2.06206
NM_001135564	-0.651018	4.99932	0.477504	HSF2	5.71313	4.68548	3.61445	5.23408
NM_001135570	-1.14113	3.16571	0.335984	C12orf73	3.40188	3.81586	2.12783	2.77398
NM_001135610	-0.798725	6.82608	0.374321	PRDM2	7.09873	7.23978	5.5813	6.88117
NM_001135629	-0.704262	5.87412	0.414326	PPP1R21	6.19678	6.1702	4.79086	5.94518
NM_001135637	-0.73617	5.83728	0.389837	PIP5K1A	5.56655	6.57617	5.15213	5.64995
NM_001135733	-1.3635	5.6111	0.139246	TP53INP1	6.48529	5.68198	3.54822	5.43223
NM_001135812	-0.963953	5.71186	0.256813	FAM60A	5.968	6.24796	4.57221	5.56481
NM_001135865	-1.16091	5.07742	0.201894	NPIPB5	4.70512	6.07234	3.69318	4.85293
NM_001136053	-0.676222	4.13619	0.483132	TPRA1	4.02313	4.7488	3.4906	3.98106
NM_001136131	-0.726922	9.23629	0.434732	APP	9.22863	9.82006	8.1754	9.27515
NM_001136140	-0.653465	4.79319	0.458639	CMPK1	4.77764	5.33341	3.88427	4.82608
NM_001136156	-1.05097	5.00678	0.225484	ZNF507	5.60692	5.24833	3.76298	4.82608
NM_001136199	-0.72363	5.11196	0.418048	GRAMD1A	4.43543	6.00557	4.98695	4.34106
NM_001136217	-0.940265	4.9951	0.305705	TMEM51	4.27512	6.00557	4.80511	3.96146
NM_001136537	-0.911023	3.66751	0.416607	BTBD19	2.61407	4.7488	3.20557	3.05863
NM_001137550	-0.82641	8.10495	0.380734	LRRFIP1	8.26551	8.63121	6.65302	8.21231
NM_001137668	-0.75928	4.24585	0.423712	CASP8AP2	4.23606	4.84676	3.47286	4.0934
NM_001139468	-0.71441	7.25363	0.430489	TBL1X	6.7904	8.06808	6.94182	6.7559
NM_001142300	-0.605009	5.58682	0.491673	CCNYL1	5.81206	5.90303	4.22537	5.84977
NM_001142364	-0.701312	5.14415	0.403551	ALG5	5.57284	5.31831	4.35694	5.06067
NM_001142528	-0.975641	4.40287	0.293148	BHLHB9	4.84149	4.77668	3.26176	4.24703
NM_001142579	-0.856716	3.83889	0.411529	ZNF780A	4.42157	3.94926	2.5896	3.8486
NM_001142595	-0.825925	5.24673	0.331694	P4HA1	4.95167	6.04508	4.64268	4.89488
NM_001142761	-0.81085	3.65815	0.443885	KNSTRN	4.0683	3.93942	2.654	3.59235
NM_001143835	-0.633694	4.86428	0.453725	NFRKB	5.11128	5.17479	4.36659	4.6413
NM_001143965	-0.854073	4.69206	0.361802	TBC1D7	5.26277	4.82021	3.03066	4.8476
NM_001144769	-0.741987	7.74713	0.415904	DST	7.83409	8.27432	6.66609	7.78185
NM_001145206	-0.641098	6.70599	0.472342	KIAA1671	6.23095	7.48514	6.305	6.39219
NM_001145394	-0.921909	4.50133	0.321949	TSEN2	4.0504	5.41018	4.15665	3.73772
NM_001145418	-0.707451	9.47738	0.491284	TTC28	9.87462	9.6965	7.21783	9.86769
NM_001145427	-1.62988	4.27876	0.091016	SNX18	5.03596	4.6972	2.73563	3.63009
NM_001145514	-1.06476	6.84137	0.272076	SCRN1	7.1448	7.40075	4.68695	6.93995
NM_001145526	-0.837409	3.84089	0.431995	AFMID	2.95925	4.84676	3.4669	3.23227
NM_001145548	-0.774445	4.90883	0.386328	ZDHHC7	4.29045	5.80894	4.57499	4.34863
NM_001145666	-0.604757	6.28152	0.49079	GLG1	6.09785	6.89645	5.5964	6.22961
NM_001145713	-0.602069	5.74564	0.47063	SAE1	5.5634	6.35541	5.46794	5.35169
NM_001145853	-1.13027	4.27006	0.266241	WFS1	3.41593	5.39587	3.89763	3.19918
NM_001146068	-0.631296	7.36203	0.479626	CAPN2	7.06903	8.05219	6.96633	7.05541
NM_001146191	-0.960776	5.96999	0.261481	MPZL1	5.88458	6.73384	5.35463	5.46393
NM_001152	-1.39534	1.32352	0.423547	SLC25A5	2.09103	1.51268	0.27569	0.596202
NM_001153	-0.723967	5.76478	0.38121	ANXA4	5.94153	6.20755	5.09722	5.57775
NM_001155	-0.894033	6.66051	0.308262	ANXA6	6.66367	7.33662	5.82339	6.40857
NM_001159491	-1.03027	5.31205	0.262057	BRI3	4.89262	6.26774	3.78232	5.27038
NM_001159508	-0.737874	4.0812	0.455245	IVD	3.75124	4.84149	3.68806	3.63009
NM_001160183	-0.850292	4.38181	0.369259	ZNF138	4.92245	4.54338	3.13963	4.39321
NM_001160408	-0.700736	4.86265	0.418615	TULP3	4.75571	5.48984	4.14175	4.73665
NM_001161841	-0.822376	6.1072	0.379835	SULF2	5.25497	7.10549	5.90173	5.30967
NM_001162894	-0.767543	5.33071	0.361709	KIAA0040	5.55072	5.76785	4.38568	5.27436
NM_001162916	-0.855545	5.29847	0.317212	TYW3	5.94396	5.31451	4.24641	5.21351
NM_001163148	-1.26564	4.76277	0.188188	ETV1	3.8268	5.96251	4.25682	3.66687
NM_001163636	-0.683481	5.34374	0.419184	GTF2I	5.22736	5.96736	4.54982	5.28228
NM_001163735	-0.611483	5.45753	0.467416	MYO19	5.23133	6.09909	4.85162	5.34414
NM_001164104	-0.898732	7.40396	0.338658	MOV10L1	7.11282	8.24118	6.09196	7.39567
NM_001164319	-0.786895	9.77903	0.421745	FLNB	9.70942	10.4385	8.15445	9.97256
NM_001164473	-0.691849	8.10399	0.482224	FNBP1L	8.46111	8.35515	6.20912	8.43876
NM_001164766	-0.949984	7.76953	0.306984	ZFHX3	7.29868	8.70599	7.00748	7.40114
NM_001164815	-0.702707	6.57979	0.4222	ACIN1	6.70287	7.05287	5.70805	6.54489
NM_001165962	-0.815835	4.74264	0.343536	ELAC2	4.81523	5.3221	4.15665	4.38587
NM_001166167	-0.938061	7.12678	0.309765	NEK6	6.5328	8.10098	6.69316	6.46186
NM_001166418	-0.709124	7.46525	0.42541	HDAC8	7.49261	8.01346	6.72286	7.34551
NM_001167582	-0.83079	6.74205	0.355975	RBM6	6.53441	7.50278	5.7393	6.65425
NM_001167672	-0.690593	10.4399	0.479185	LPP	10.662	10.8221	8.81093	10.7113
NM_001167740	-0.758213	9.34244	0.413093	SMYD3	9.49972	9.82642	8.27068	9.35761
NM_001168243	-1.45341	0.980898	0.421026	C4orf48	1.43779	1.51268	0.220052	-0.197025
NM_001168278	-0.935934	9.59549	0.355655	WWTR1	9.88822	10.0831	7.39629	9.80411
NM_001168344	-0.961763	7.41023	0.294388	RREB1	7.43686	8.11033	6.13772	7.32648
NM_001168398	-0.660393	5.79693	0.453852	SLC35A1	6.18862	5.9842	4.43233	6.01579
NM_001170715	-0.816012	6.79392	0.390516	BCAR1	5.74965	7.83995	6.29913	6.35698
NM_001170765	-0.741047	7.04636	0.427222	LCOR	7.13103	7.57523	5.51927	7.24976
NM_001171080	-0.636471	5.77594	0.471034	RBM41	6.33997	5.71118	4.48343	5.98941
NM_001171083	-0.607152	5.16833	0.471356	SMPD4	4.96129	5.79537	4.65322	4.98986
NM_001171617	-0.657894	4.80995	0.459632	PREPL	5.22736	4.96297	3.73348	4.92048
NM_001172087	-1.00156	4.29846	0.332809	PEX2	5.26277	3.82657	2.499	4.37109
NM_001172650	-1.0777	2.13096	0.476567	ZNF559-ZNF177	1.98194	2.96087	1.42013	1.53459
NM_001172735	-1.00104	7.40542	0.304774	PPP1R16B	7.04325	8.32383	5.68383	7.44856
NM_001173128	-0.809598	5.20834	0.34352	YTHDF2	5.07189	5.91813	4.34073	5.06527
NM_001173487	-0.931684	2.70575	0.473419	NKRF	2.92036	3.22653	2.20151	2.09842
NM_001173533	-0.803127	5.52455	0.346503	DGCR2	5.12417	6.35726	5.15028	4.97527
NM_001174092	-0.828575	4.39894	0.368374	TMEM185A	4.67623	4.82556	3.51393	4.24703
NM_001175	-1.21436	5.50291	0.15715	ARHGDIB	6.39242	5.41729	4.39826	5.06985
NM_001178008	-0.886864	4.67613	0.335706	CBS	4.00465	5.64917	4.11912	4.20597
NM_001178032	-0.836412	5.79232	0.318472	ZC4H2	5.99632	6.2892	4.90331	5.63455
NM_001178035	-0.705225	7.32722	0.427947	CEP85L	7.42909	7.81865	6.46613	7.2837
NM_001178099	-0.933978	3.45659	0.396341	ZNF182	3.65975	4.0069	2.72567	3.07697
NM_001178101	-0.683668	4.60567	0.443093	ZNF37A	4.85702	4.95323	3.70843	4.60386
NM_001182	-0.771588	4.95398	0.387283	ALDH7A1	5.17462	5.39587	3.55947	5.09256
NM_001184721	-0.845138	4.94672	0.331536	GYG1	5.54754	5.02008	3.87079	4.8845
NM_001184722	-0.812033	4.31967	0.444204	GPI	3.13939	5.38141	4.45057	2.77398
NM_001184748	-0.633741	5.40839	0.464551	PAFAH1B2	5.65805	5.72269	4.23242	5.58096
NM_001184763	-0.785328	3.98804	0.43162	UHMK1	4.5028	4.12441	3.03066	3.92143
NM_001184902	-0.872393	6.71288	0.341443	CARD8	6.09349	7.6645	6.39489	5.99906
NM_001184945	-0.994917	6.17637	0.275216	FAM219A	5.63121	7.15944	5.56883	5.619
NM_001184970	-0.868199	6.63174	0.35638	PACSIN2	5.71029	7.67046	6.27203	5.97726
NM_001184977	-0.768361	5.89217	0.367151	UQCC1	5.71598	6.59978	5.33185	5.57129
NM_001185010	-0.842629	5.69574	0.328407	RNF4	5.3568	6.52448	4.88554	5.48124
NM_001185024	-0.633494	4.64211	0.483029	ZDHHC8	4.15462	5.41729	4.27058	4.30262
NM_001185076	-0.738029	5.24942	0.437326	FMR1	6.00564	4.95323	3.34864	5.55504
NM_001190326	-0.929776	5.35203	0.284233	DGCR8	4.92736	6.25986	4.58052	5.01385
NM_001190826	-1.5011	2.47739	0.312403	FAM217B	3.72891	1.7107	0.478986	2.16849
NM_001190836	-0.697188	4.47366	0.439392	DCTN1	4.40053	5.07051	4.25682	3.86978
NM_001190946	-1.1028	5.44088	0.193468	FAM193B	5.28972	6.31034	4.66889	4.89488
NM_001190992	-0.87919	4.40941	0.352171	SLC33A1	4.64078	4.91359	3.10165	4.42218
NM_001191061	-1.13001	2.11968	0.474585	SLC25A22	1.68984	3.05496	2.12783	-0.197025
NM_001193465	-0.719196	8.25667	0.461019	KANSL1	8.57466	8.56958	6.4869	8.54218
NM_001193511	-0.727405	3.6098	0.495288	MAP3K12	3.56206	4.2005	3.36797	2.98287
NM_001193538	-0.752274	4.16006	0.491394	TMEM126B	5.06299	3.53157	2.06606	4.49898
NM_001195131	-0.973594	3.6366	0.380506	TSTD3	4.44916	3.47822	2.22995	3.60504
NM_001195203	-0.838656	5.15182	0.388008	EEF1D	3.70622	6.28338	4.99733	4.23891
NM_001195602	-0.690657	4.61706	0.432983	SEPHS1	4.72783	5.08842	3.84803	4.53258
NM_001195677	-0.867865	5.70191	0.303343	VAPB	5.84619	6.26577	4.71741	5.56806
NM_001197027	-0.679608	5.99572	0.439834	PLEKHA8	6.30831	6.28338	4.82622	6.12555
NM_001197181	-0.918262	4.15875	0.354232	TUBB3	4.3575	4.71461	2.78439	4.16371
NM_001197293	-0.76861	7.16834	0.391957	DPYSL2	7.0878	7.82334	6.20912	7.11762
NM_001198802	-0.787286	8.39661	0.398292	EIF4G3	8.26406	9.09291	7.33213	8.38136
NM_001198844	-0.671033	5.00028	0.443462	RBM4	4.92736	5.59068	3.92834	5.09706
NM_001198846	-1.10505	3.24179	0.360575	RBM14-RBM4	2.61407	4.29608	2.33845	2.79629
NM_001198850	-0.744797	7.23904	0.408399	FOXJ3	7.33055	7.76467	6.1656	7.26783
NM_001198863	-0.988859	5.71227	0.246811	CPNE1	5.50545	6.55378	4.94037	5.30579
NM_001199692	-0.758542	3.92348	0.456397	SLC4A2	3.52365	4.72609	3.4906	3.48659
NM_001199817	-0.82063	3.28901	0.475586	GGCT	3.54937	3.7157	2.57858	3.02125
NM_001199818	-0.922092	5.73686	0.271784	ARMCX5-GPRASP2	5.89465	6.32363	4.79562	5.52196
NM_001199853	-0.778344	5.24919	0.357809	AK3	5.21134	5.88264	4.35372	5.1543
NM_001199868	-0.798162	5.97622	0.360945	GLRX3	6.01721	6.5714	4.87432	5.96992
NM_001201329	-0.923859	4.89914	0.336311	PPP1R3B	5.51201	5.02938	2.79395	5.10601
NM_001201340	-0.610501	5.69609	0.469288	SAFB	5.661	6.22182	4.87882	5.7187
NM_001201370	-0.86494	4.7067	0.41375	RNF7	5.74687	3.79419	2.43935	4.98986
NM_001201429	-0.754784	7.012	0.398772	CABIN1	6.6444	7.80721	6.53115	6.63736
NM_001202423	-0.957582	4.35804	0.328243	TRMT1L	5.17462	4.17558	2.88621	4.36364
NM_001202438	-0.66482	5.51259	0.442299	EDRF1	6.09349	5.44883	4.37934	5.64073
NM_001202550	-0.818959	7.03189	0.372684	WDR27	6.39951	7.96277	6.6385	6.48607
NM_001204	-0.730431	7.85221	0.436475	BMPR2	7.82688	8.44999	6.49718	8.00771
NM_001204255	-1.26709	5.80829	0.148485	SCARB2	6.39597	6.21369	4.2076	5.56806
NM_001204367	-1.2118	5.59674	0.148939	MGST2	5.72164	6.36463	4.62672	5.07442
NM_001204478	-1.04843	5.2867	0.235499	TVP23C-CDRT4	4.77764	6.28143	4.36659	4.92048
NM_001204813	-0.867817	6.41513	0.354922	NT5E	7.19862	6.20345	4.86755	6.51997
NM_001204814	-0.836375	2.99993	0.499487	ZNF586	2.51313	3.86863	2.56748	2.44747
NM_001204831	-0.791158	7.49071	0.382163	ANO10	7.26512	8.23868	6.71722	7.30622
NM_001204878	-0.894328	3.1352	0.453202	BAG4	3.13939	3.78324	2.91277	2.20229
NM_001206480	-1.01927	8.72936	0.281298	ELMO1	8.25285	9.69996	7.94224	8.29883
NM_001206541	-0.68027	7.1745	0.448769	CAPZB	6.77822	7.94199	6.61981	6.94993
NM_001206559	-0.907172	5.70341	0.288249	POLR1D	6.32143	5.80624	4.57499	5.60643
NM_001206739	-0.624454	5.13515	0.479353	ITGB3BP	5.61607	5.17898	3.8753	5.34792
NM_001206844	-0.913261	2.6272	0.49934	TGOLN2	2.73106	3.24261	1.49236	2.52964
NM_001206938	-0.809774	5.85404	0.367662	TCAF1	6.57097	5.70828	4.48048	5.95016
NM_001207066	-0.764445	4.41008	0.412196	CXADR	4.03228	5.20794	4.07668	3.85923
NM_001226	-0.800971	4.49431	0.398003	CASP6	4.88759	4.79316	3.00619	4.6413
NM_001237	-0.988315	3.39142	0.412904	CCNA2	4.36476	2.88091	1.70994	3.44485
NM_001242318	-0.672264	6.62161	0.456376	PDE7A	6.75906	7.0631	5.38024	6.78547
NM_001242416	-0.782011	5.57139	0.362224	WDR20	5.10696	6.42049	5.06205	5.18843
NM_001242786	-1.15619	5.65493	0.21929	BRF1	4.62273	6.83677	5.25607	4.59116
NM_001242799	-0.710731	4.47498	0.45931	ZNF322	5.17875	4.24908	3.13211	4.64745
NM_001242820	-0.859975	4.01494	0.392207	DEF8	3.67151	4.84676	3.57064	3.4589
NM_001242825	-0.90758	3.62309	0.418839	FDPS	2.77533	4.65576	2.88621	3.28054
NM_001242837	-0.729742	5.60408	0.398333	AP2A2	5.04954	6.46059	5.23166	5.14998
NM_001242882	-0.856756	4.64045	0.331654	CARKD	4.59212	5.3221	4.11149	4.18076
NM_001242918	-0.690015	7.3954	0.482871	ZFAND6	7.72688	7.67269	5.36909	7.75861
NM_001242933	-0.825782	5.86684	0.353923	SNX1	5.98929	6.42226	4.43538	5.96992
NM_001243532	-1.36782	1.53434	0.424473	PDIK1L	2.31746	1.66368	0.815694	0.490742
NM_001243704	-0.908834	3.32419	0.458963	ZBTB14	4.13776	3.10861	1.44461	3.50024
NM_001243779	-1.01606	6.42425	0.252342	FAM213A	6.54244	7.09446	5.26984	6.23165
NM_001243799	-0.71045	8.02658	0.452871	TSC22D1	8.32953	8.34773	6.54254	8.24105
NM_001244766	-0.656415	5.48213	0.43099	MOB1B	5.60692	5.92063	4.68952	5.44641
NM_001244974	-0.729613	4.70487	0.410397	PPP1CC	5.05404	4.99181	3.68293	4.72507
NM_001252406	-0.921759	4.33859	0.349375	ZBTB7B	3.56206	5.35576	4.00852	3.55359
NM_001253676	-0.766037	5.17287	0.366106	TBPL1	5.661	5.32965	4.22537	5.11934
NM_001254757	-0.78832	4.54879	0.420315	ST3GAL4	3.80561	5.48984	4.64268	3.18234
NM_001256047	-1.11559	3.7701	0.285248	C19orf12	3.59947	4.64974	3.09393	3.11295
NM_001256121	-0.712528	4.86324	0.4154	S100PBP	5.06299	5.27985	3.79665	4.92048
NM_001256124	-1.2837	3.01526	0.336298	TRIM65	1.68984	4.28059	2.74551	1.3659
NM_001256438	-1.32383	7.31695	0.160373	CABLES1	6.75492	8.44174	6.43744	6.57584
NM_001256447	-1.02294	4.66194	0.265709	BCAP31	4.21211	5.61868	4.29434	3.77189
NM_001256798	-0.693644	7.06394	0.464839	NOL4L	6.10003	8.03267	6.92832	6.36633
NM_001256909	-0.727345	4.42752	0.434347	CYBRD1	4.99443	4.44254	3.41828	4.44353
NM_001257370	-0.953772	2.66446	0.486844	EME2	2.01923	3.65689	1.66897	2.44747
NM_001258322	-0.810024	4.44476	0.378275	TP53I11	4.29045	5.16216	3.7185	4.20597
NM_001258379	-0.735913	8.4088	0.428662	SLC4A7	8.12399	9.15585	7.52814	8.34636
NM_001258452	-0.882459	6.20138	0.320515	FBXO18	6.06925	6.95009	5.28347	6.01341
NM_001260	-0.66661	7.15411	0.477179	CDK8	7.31001	7.57681	5.60729	7.4228
NM_001261	-0.824841	3.70845	0.435052	CDK9	3.96698	4.15023	2.63285	3.66687
NM_001261411	-0.70829	6.19101	0.41982	SFSWAP	6.11948	6.80327	5.42091	6.08988
NM_001261826	-0.615671	5.98397	0.480592	AP3D1	5.58532	6.71523	5.36108	5.8788
NM_001261843	-0.712444	3.69932	0.49551	ZNF623	3.49747	4.37847	3.24095	3.34247
NM_001267056	-1.00509	5.79136	0.254178	CASP7	5.66689	6.60134	4.47751	5.68623
NM_001267598	-0.973809	4.87234	0.285574	MGST1	5.80941	4.42854	3.73844	4.7134
NM_001267607	-0.739499	4.17235	0.433412	ZNF248	4.44916	4.53033	3.63587	3.85923
NM_001267610	-0.819285	5.55676	0.335806	GPR161	5.23133	6.36647	4.89223	5.26239
NM_001267782	-0.619503	6.86444	0.481667	AMBRA1	6.60509	7.53007	6.3559	6.66943
NM_001270379	-1.01895	4.57277	0.246086	ANKRD46	4.90263	5.07501	3.91526	4.02893
NM_001270380	-0.763536	7.01557	0.398613	XRRA1	7.06903	7.58077	5.83847	7.07379
NM_001270483	-0.801491	3.7536	0.441185	TST	3.54937	4.48372	3.37436	3.19918
NM_001270764	-1.34365	5.70008	0.132102	CHST15	5.19513	6.81408	4.72742	5.01385
NM_001270782	-0.892412	3.19358	0.454433	TFAM	3.88855	3.16033	2.06606	3.11295
NM_001270837	-1.24874	2.53123	0.359435	CRIP2	2.75336	3.22653	1.91657	1.58671
NM_001271015	-0.805372	6.58397	0.379736	UBE2W	6.66072	7.15944	5.15585	6.70228
NM_001271069	-0.832475	5.94291	0.352597	MAX	6.4719	6.1057	4.48638	6.04867
NM_001271594	-0.867579	3.93927	0.406184	SESN3	3.13939	4.93849	3.4549	3.41633
NM_001271606	-1.06957	6.56275	0.234646	BASP1	6.20287	7.51027	6.01844	5.83638
NM_001271681	-1.25488	1.66572	0.445425	PYCR2	2.12564	2.14653	0.815694	0.954559
NM_001271783	-1.10017	8.17615	0.246207	FAR2	8.26017	8.91427	6.62852	8.07254
NM_001271824	-0.810805	4.76067	0.36632	SERPINB6	4.91257	5.28374	3.52545	4.80424
NM_001271848	-1.09609	5.01109	0.225513	ZNF700	5.2073	5.67311	3.32246	4.96547
NM_001271853	-0.777086	5.00279	0.362773	CEP57L1	5.20326	5.46263	4.06093	4.93563
NM_001271906	-0.695125	4.73047	0.434247	GSKIP	5.2073	4.84149	3.6622	4.80424
NM_001271922	-0.953482	5.28198	0.263439	SEC11A	5.32365	5.96736	4.21829	5.10601
NM_001276274	-1.11291	2.43602	0.424342	TMEM80	2.66201	3.05496	1.78854	1.73263
NM_001276727	-0.772825	4.52792	0.401829	C11orf74	5.09827	4.58182	3.34214	4.58477
NM_001277200	-0.726523	4.97105	0.401458	CNIH4	5.29733	5.27985	3.89763	5.0186
NM_001278074	-0.856031	7.1308	0.372873	COL5A1	6.10003	8.19129	6.82196	6.43012
NM_001278186	-0.682582	8.15339	0.471029	HERC4	8.25627	8.6293	6.72911	8.37165
NM_001278196	-1.46397	3.47719	0.187031	ZBTB18	3.91846	4.13307	2.38978	2.72831
NM_001278285	-0.829545	5.80061	0.360352	RPE	6.44988	5.78991	4.17505	5.96254
NM_001278346	-0.814938	4.95737	0.35611	PHYKPL	4.50936	5.81702	4.2076	4.73087
NM_001278407	-0.696863	5.97662	0.414203	ANXA11	5.86423	6.60601	5.37069	5.77313
NM_001278513	-0.678082	6.39538	0.436375	CUL4A	6.39242	6.94395	5.64342	6.31318
NM_001278589	-0.699308	5.22512	0.435452	ST13	5.77984	5.23633	3.7483	5.44993
NM_001278597	-1.90087	9.5317	0.0725053	ANO2	8.44107	10.957	7.81217	8.64638
NM_001278623	-1.04206	3.23136	0.37097	NFXL1	3.77324	3.53157	2.20151	2.94344
NM_001278636	-1.09557	4.78768	0.215886	EBPL	4.61056	5.66418	4.18598	4.08436
NM_001278677	-0.804815	7.4938	0.407098	ZNF254	7.75617	7.92153	5.58819	7.74506
NM_001280539	-0.762842	7.66972	0.435345	RNF19A	7.88674	8.10814	5.73435	7.95973
NM_001280788	-0.757304	5.01598	0.385918	SURF4	4.80459	5.73695	4.06093	4.97527
NM_001281429	-0.880205	6.78358	0.321073	PCED1B	6.89566	7.37908	5.72439	6.67696
NM_001281501	-0.807587	6.26269	0.355277	FADS2	6.46347	6.74377	5.31701	6.1668
NM_001281731	-0.741781	5.35689	0.376854	CERS5	5.33848	5.95521	4.56106	5.23816
NM_001281773	-0.614325	7.98468	0.499274	ZMYND8	7.77332	8.62202	7.26413	7.94608
NM_001281789	-1.17546	3.3437	0.327955	CNEP1R1	4.11211	3.45079	1.56115	3.26463
NM_001282113	-0.670008	4.94194	0.436028	TOP3B	4.69364	5.6279	4.51267	4.61645
NM_001282129	-0.74063	8.37675	0.443259	SSH2	8.05441	9.14466	7.00491	8.52934
NM_001282136	-0.642396	6.74309	0.47041	MEI4	6.48195	7.42386	5.96444	6.71258
NM_001282168	-0.643719	5.34301	0.460112	VPS36	5.8591	5.35576	4.13801	5.51861
NM_001282180	-0.65022	6.83772	0.458918	PPP2R5E	6.77822	7.40611	6.11788	6.76299
NM_001282290	-0.6287	4.84788	0.474074	ARHGAP27	4.47623	5.5717	4.28421	4.6838
NM_001282305	-1.07953	3.38271	0.354609	STK25	2.77533	4.41441	2.81288	2.65698
NM_001282310	-0.96927	2.6434	0.472623	CATSPER2	2.28721	3.53157	1.80754	2.29918
NM_001282412	-0.779698	4.08913	0.420412	PPP1R7	4.12071	4.66772	3.73348	3.54044
NM_001282427	-1.02329	2.90164	0.429778	PIK3CG	2.90051	3.60806	2.90397	1.10509
NM_001282451	-0.747849	3.95792	0.472248	ESRRA	3.17287	4.89335	3.66741	3.37247
NM_001282500	-0.790449	5.31283	0.351731	TTC1	5.5697	5.73411	4.25336	5.29408
NM_001282531	-0.658232	7.04234	0.483854	ADNP	7.25148	7.41324	5.43625	7.33412
NM_001282539	-0.748983	7.29928	0.417585	GNB1	6.83291	8.13424	6.39489	7.23759
NM_001282552	-0.651255	5.77681	0.486321	BTBD3	6.3853	5.65819	3.94987	6.12995
NM_001282632	-1.11298	3.50557	0.328244	GBGT1	2.92036	4.54986	2.66446	3.00219
NM_001282652	-0.670209	4.28934	0.477886	STIP1	4.20403	4.88313	3.53688	4.21428
NM_001282663	-0.971644	7.88043	0.291074	MICAL2	7.62776	8.73613	6.9951	7.57569
NM_001282682	-0.810412	5.20113	0.338854	SH3YL1	5.37489	5.70538	4.21829	5.12376
NM_001282695	-0.776294	8.04738	0.407792	FAM107B	7.43772	8.94991	7.73643	7.46518
NM_001282705	-1.09039	4.47849	0.225508	PDIA6	4.68786	5.11924	3.91526	3.73772
NM_001282951	-0.615342	4.41878	0.497263	COPS7B	4.65862	4.72036	3.87079	4.25511
NM_001282963	-0.606257	4.88175	0.484959	HJURP	5.38207	4.87799	3.99615	4.94565
NM_001282974	-1.13501	8.49298	0.244254	MTSS1	8.28908	9.4042	6.85487	8.38918
NM_001283026	-1.11411	5.11956	0.190354	NAPB	5.25497	5.83039	4.12292	4.73087
NM_001283034	-0.619788	5.55779	0.490914	FAM92A1	6.04233	5.59382	4.00029	5.86831
NM_001284206	-0.906029	6.41718	0.308632	DCAF5	6.77686	6.82346	5.17426	6.37376
NM_001284281	-0.62249	6.43009	0.496307	PPP4R3A	6.70144	6.71523	5.03409	6.68893
NM_001284315	-0.763027	4.17735	0.436952	DBNL	3.63594	5.04322	3.60362	3.86978
NM_001284342	-0.862048	5.07324	0.314988	VKORC1L1	4.79924	5.88008	4.50978	4.6413
NM_001284390	-0.954435	7.87408	0.316582	VGLL4	7.81235	8.62317	6.31582	7.90626
NM_001284401	-0.739935	5.36766	0.377406	TAMM41	5.5697	5.80081	4.48048	5.30579
NM_001285387	-0.817519	3.66244	0.440235	THOC7	3.88855	4.12441	2.74551	3.54044
NM_001286051	-0.611752	6.34782	0.492675	FAM168A	5.85395	7.11754	6.1045	5.9047
NM_001286277	-0.628139	6.61503	0.488132	TUBGCP3	7.07347	6.69199	5.36268	6.81989
NM_001286366	-0.807772	5.61812	0.329976	MAP7D1	5.6432	6.2279	4.94895	5.34035
NM_001286479	-0.748541	4.16416	0.454481	ARHGAP11A	4.73905	4.19224	2.76509	4.32581
NM_001286491	-0.922144	9.77569	0.365815	FRMD5	10.0405	10.2785	7.52312	10.0048
NM_001286505	-0.652936	5.16603	0.447346	HSPH1	5.45191	5.45919	4.07668	5.28623
NM_001286638	-0.74898	5.74647	0.399562	ZDHHC20	6.15551	5.98659	4.23593	5.94018
NM_001286661	-1.0285	3.64421	0.334884	TMEM68	3.61173	4.40729	2.95599	3.11295
NM_001286745	-0.733258	4.91083	0.456704	OTUD6B	5.72729	4.47694	2.93022	5.23816
NM_001286751	-0.803847	6.32362	0.358065	MRPS27	6.62639	6.71235	5.36268	6.23981
NM_001286807	-0.785136	3.87026	0.461864	SLC25A30	4.45597	3.91955	2.24397	4.07527
NM_001286808	-0.837982	5.4822	0.36305	PRRC1	6.15132	5.44883	3.66741	5.68921
NM_001286839	-0.647736	7.25833	0.468639	FARP1	6.93033	7.97546	6.81553	6.97581
NM_001287002	-0.808438	3.63001	0.456436	ST6GALNAC6	3.25331	4.44254	3.37436	2.90291
NM_001287349	-0.997284	2.64712	0.450465	ZNF852	3.03403	3.07307	1.72999	2.33008
NM_001287744	-0.657263	6.71823	0.488852	FDFT1	7.34714	6.56981	5.08169	7.01913
NM_001287811	-0.675557	4.6258	0.446184	DNAJC16	4.93713	4.90856	3.73348	4.62893
NM_001288564	-0.795637	3.71366	0.447523	TMEM9	3.70622	4.31902	3.56506	2.83988
NM_001288660	-0.998064	5.61637	0.250885	METTL9	5.83054	6.20755	4.18961	5.56481
NM_001288731	-0.90364	8.36025	0.337936	DAPK1	8.32675	9.06492	7.03947	8.35061
NM_001288736	-0.647981	7.17379	0.470997	ATE1	7.24165	7.65251	6.12453	7.27876
NM_001288981	-0.812261	4.1787	0.480449	C18orf54	5.14541	3.45079	1.53858	4.55891
NM_001289152	-0.752828	5.10494	0.372514	MICA	5.01304	5.75389	4.54699	4.79873
NM_001289405	-0.70879	5.89882	0.416362	MMS19	6.08032	6.32929	4.72243	6.00625
NM_001290	-0.898813	10.7672	0.400164	LDB2	11.1988	11.095	8.01582	11.0869
NM_001290048	-0.958018	5.22449	0.265765	ATL3	5.52827	5.71694	3.94559	5.14998
NM_001290229	-0.635462	6.38878	0.474307	SCAMP1	6.79578	6.53594	5.31369	6.51662
NM_001290259	-0.695629	7.02954	0.487008	PHF3	7.71344	6.8248	4.90772	7.40659
NM_001290326	-0.965847	5.14654	0.316211	USP38	6.0648	4.7488	3.15455	5.29408
NM_001291958	-0.689599	6.60797	0.445945	MAP3K4	7.02617	6.78828	5.31701	6.77568
NM_001291963	-1.08219	7.30131	0.237716	DAP	6.97015	8.24368	6.41594	6.8707
NM_001293092	-1.0111	6.31689	0.262942	GNA12	5.88962	7.2646	5.5964	5.84175
NM_001293187	-0.929887	3.73272	0.373288	METTL5	4.3575	3.8372	2.86822	3.4589
NM_001293286	-0.753659	7.62854	0.412218	SPATS2	7.32312	8.39528	6.74767	7.54884
NM_001293643	-3.03857	6.86808	0.00453257	PGF	6.39774	8.37763	3.58722	5.27832
NM_001297549	-0.685883	5.1661	0.419408	UPF1	4.86728	5.88777	4.72742	4.83149
NM_001297560	-0.666926	5.10678	0.442715	ZNF708	5.31618	5.48308	3.92399	5.25436
NM_001297595	-0.670283	5.64069	0.450534	SIN3B	4.85702	6.54408	5.47984	5.00909
NM_001297650	-0.845224	6.51381	0.352891	CD163L1	6.37994	7.24378	5.27837	6.52332
NM_001297734	-0.855956	2.91076	0.486739	ZNF417	3.15622	3.36522	2.31208	2.50277
NM_001297776	-0.796674	6.17578	0.389175	RIMKLB	6.41533	6.61839	4.59972	6.34946
NM_001300865	-0.875095	5.57716	0.313532	RANBP3	5.08953	6.48107	5.26125	4.85293
NM_001301063	-0.901134	6.53434	0.336159	NDST1	5.65213	7.57761	6.07442	5.95016
NM_001301083	-0.609547	5.34793	0.497435	CNOT8	5.66395	5.57805	3.79665	5.66517
NM_001301099	-0.698161	5.48923	0.416391	ZBTB44	5.87189	5.71694	4.29771	5.61273
NM_001301132	-0.749218	3.94068	0.451821	BAHD1	3.81624	4.60066	3.44279	3.57954
NM_001301203	-1.07968	6.2721	0.216662	TMED3	6.25655	7.05856	5.57161	5.69219
NM_001301698	-0.827378	6.31454	0.357585	ERI3	5.82528	7.19708	5.93126	5.74474
NM_001302461	-0.761681	5.18316	0.382548	KLF13	4.68206	6.03357	4.95109	4.51251
NM_001302508	-1.46188	5.9487	0.110379	MMP2	6.40656	6.59352	3.93699	5.66214
NM_001302617	-0.817496	4.15829	0.39183	ACYP1	4.37917	4.62541	3.31584	3.99076
NM_001303100	-0.80693	5.79024	0.358184	ERICH1	5.17048	6.70946	5.41473	5.23816
NM_001303241	-0.718636	5.69935	0.398278	CNOT6	5.79335	6.2055	4.67407	5.73033
NM_001303256	-0.733046	5.45566	0.384972	MORC2	5.2073	6.18067	4.84243	5.21765
NM_001303275	-0.603329	6.51193	0.486227	ACLY	6.43444	7.06083	5.99377	6.3419
NM_001303426	-0.72252	3.77205	0.48725	ZNF639	4.14622	4.02562	2.71565	3.81622
NM_001303447	-0.826362	5.74419	0.335611	TXNDC11	5.69884	6.41163	4.69972	5.68324
NM_001304263	-0.76183	7.48968	0.404404	LDLRAD3	7.02274	8.3309	7.13658	6.97581
NM_001304466	-0.623664	4.53796	0.485555	SLC29A1	4.30562	5.18315	4.32763	4.02893
NM_001304468	-0.706823	4.74632	0.430011	METTL10	4.58592	5.41018	3.7581	4.77084
NM_001304481	-0.708305	7.77686	0.443477	FGD4	7.87216	8.27579	6.5482	7.90434
NM_001304514	-0.737147	6.77184	0.425732	GALNT11	7.04325	7.14347	5.2299	6.98312
NM_001304521	-0.708372	3.93197	0.477397	IMPDH1	3.83727	4.54338	3.74338	3.26463
NM_001304564	-0.994561	2.83456	0.4309	MIEF1	2.95925	3.45079	2.62216	1.68561
NM_001304799	-1.24648	1.5831	0.468334	NARFL	1.06244	2.63499	0.657141	0.954559
NM_001304808	-1.11969	6.11134	0.219531	BRD1	5.66982	7.11317	5.19965	5.65606
NM_001304958	-0.641177	6.28779	0.492777	CCDC92	6.55519	6.59195	4.65846	6.59981
NM_001305040	-0.754857	5.40565	0.396399	ZNF33B	5.71313	5.75669	3.87979	5.60011
NM_001305049	-1.00907	3.90925	0.358804	TMEM59	4.68786	3.85823	1.78854	4.05692
NM_001306079	-0.668228	4.57813	0.444851	CAD	4.84668	4.89335	4.041	4.34863
NM_001306082	-1.14401	7.40215	0.245358	STK32B	6.33813	8.5878	6.95093	6.44255
NM_001306084	-0.996086	9.18739	0.292514	CFAP54	8.76984	10.1251	8.3089	8.85067
NM_001306140	-0.992492	3.17847	0.399402	QDPR	3.52365	3.62043	3.01439	1.94716
NM_001306154	-0.651511	5.05638	0.43901	CCT5	5.22736	5.45229	4.26715	5.02334
NM_001307922	-0.807412	3.44524	0.467175	RWDD4	3.84768	3.72718	2.61139	3.28054
NM_001307975	-1.0362	5.40699	0.261795	TMPO	5.85136	5.8197	3.40587	5.49835
NM_001308109	-0.90851	6.86455	0.342498	SNCAIP	6.9594	7.4902	4.96807	7.03211
NM_001308110	-0.854459	4.93962	0.382716	MBIP	5.92934	4.18394	3.23394	5.10601
NM_001308153	-0.623567	6.93687	0.483893	ARHGEF10	6.54404	7.67046	6.46538	6.7067
NM_001308173	-0.930833	5.32758	0.285531	CCNJL	4.82052	6.26577	4.86074	4.70753
NM_001308175	-0.929097	7.31837	0.303126	SH3PXD2B	7.17609	8.09767	6.42442	7.06578
NM_001308237	-0.665751	7.80457	0.485589	ZZZ3	8.1975	7.99459	6.20196	8.08901
NM_001308258	-0.707659	5.08534	0.448614	HPS3	5.90215	4.61309	3.57619	5.31354
NM_001310137	-0.774264	3.4744	0.494417	NPIPB11	2.73106	4.40729	3.08617	2.96329
NM_001310148	-1.18082	4.90839	0.188432	NPIPB4	4.75018	5.8197	3.59818	4.62893
NM_001312686	-0.828355	5.52477	0.33777	LRIG2	5.7607	5.99136	4.2076	5.58417
NM_001336	-0.689617	4.67778	0.428337	CTSZ	4.67039	5.23231	4.1267	4.43645
NM_001347	-0.944351	4.13281	0.354671	DGKQ	3.32951	5.16638	3.8014	3.31184
NM_001359	-0.650436	6.32023	0.48263	DECR1	6.68558	6.5294	4.78847	6.59822
NM_001380	-0.704697	8.79386	0.448638	DOCK1	8.56681	9.49387	7.90936	8.76386
NM_001394	-1.88933	4.76549	0.05034	DUSP4	4.58592	5.95032	2.654	4.08436
NM_001498	-0.719068	5.16862	0.397963	GCLC	5.65509	5.28762	4.2076	5.16719
NM_001552	-1.5335	4.00178	0.131981	IGFBP4	3.83727	5.05693	3.09393	2.98287
NM_001567	-0.781776	5.34818	0.355769	INPPL1	5.44165	5.89542	4.34399	5.30967
NM_001605	-0.623601	4.72609	0.474896	AARS	4.54176	5.34835	4.27741	4.47152
NM_001619	-0.959963	4.05427	0.322334	ADRBK1	4.29806	4.58813	3.54822	3.43066
NM_001659	-0.753491	4.27776	0.417856	ARF3	4.29806	4.85201	3.73844	3.95155
NM_001664	-0.646374	5.36996	0.446222	RHOA	5.08074	6.06557	4.74478	5.23408
NM_001681	-0.808448	6.30356	0.362312	ATP2A2	6.20691	6.99113	5.34654	6.21312
NM_001711	-1.1563	4.48644	0.231212	BGN	4.32808	5.38866	2.86822	4.36364
NM_001714	-0.914873	7.29499	0.308092	BICD1	7.09764	8.09491	6.59406	6.91978
NM_001718	-1.0194	10.6229	0.31721	BMP6	11.0263	11.0623	8.3516	10.7791
NM_001752	-0.662717	4.30867	0.484383	CAT	4.83104	4.32659	3.35512	4.35615
NM_001755	-0.810787	6.33116	0.364304	CBFB	6.17629	7.05287	5.35302	6.24995
NM_001797	-0.615542	7.2421	0.491068	CDH11	6.94373	7.92589	6.66088	7.10762
NM_001802	-0.81356	5.37248	0.359559	CDR2	5.73291	5.71406	3.8249	5.5253
NM_001814	-0.689238	6.48609	0.436242	CTSC	7.00309	6.5392	5.50188	6.52332
NM_001908	-1.06238	5.24875	0.216672	CTSB	5.25888	6.01262	4.06093	5.02806
NM_001909	-1.38534	3.08575	0.247656	CTSD	3.26888	3.88922	2.28522	2.16849
NM_001931	-0.893218	4.05463	0.355346	DLAT	4.48291	4.37117	3.4906	3.57954
NM_001947	-1.39534	1.48797	0.413003	DUSP7	1.54395	2.33836	0.614622	0.596202
NM_001973	-0.75044	5.27861	0.441568	ELK4	5.83577	5.33716	2.93886	5.65606
NM_001984	-0.832612	5.20293	0.37653	ESD	6.13866	4.58182	3.67778	5.33275
NM_001992	-1.03593	6.15783	0.298021	F2R	6.7877	6.35171	3.73844	6.33048
NM_002013	-0.841925	5.12607	0.342966	FKBP3	5.55072	5.42083	3.65697	5.22999
NM_002014	-0.944194	3.72189	0.361947	FKBP4	3.75124	4.40014	3.15455	3.18234
NM_002015	-0.912022	8.64922	0.352288	FOXO1	8.66933	9.32568	6.84801	8.78875
NM_002018	-0.605917	4.50459	0.498115	FLII	4.61056	4.9186	3.87079	4.41499
NM_002037	-0.888992	8.84723	0.348525	FYN	8.84478	9.52462	7.48711	8.86624
NM_002039	-0.868984	7.94273	0.401835	GAB1	8.32349	8.30289	5.35625	8.26424
NM_002046	-0.994753	4.63126	0.259405	GAPDH	4.64078	5.35576	3.96264	4.12898
NM_002056	-0.855606	5.52962	0.320578	GFPT1	5.50874	6.19933	4.36017	5.50174
NM_002069	-0.671894	6.09845	0.470387	GNAI1	6.56625	6.20345	4.54417	6.36633
NM_002072	-0.889456	9.42764	0.3655	GNAQ	9.71244	9.89194	7.57913	9.59737
NM_002076	-0.769607	5.09077	0.362996	GNS	5.2432	5.58438	4.20402	4.99951
NM_002092	-0.903749	4.07383	0.358083	GRSF1	4.22812	4.64974	3.14711	3.86978
NM_002095	-0.629637	5.52592	0.455183	GTF2E2	5.49225	6.06331	4.67666	5.54848
NM_002097	-1.28273	2.61085	0.348581	GTF3A	3.54937	2.48079	1.34409	2.20229
NM_002109	-0.720327	3.88441	0.474746	HARS	3.76228	4.52376	3.47286	3.47281
NM_002133	-0.934932	3.44936	0.397041	HMOX1	3.858	3.81586	2.68516	3.09507
NM_002146	-1.29446	5.47709	0.14517	HOXB3	4.99443	6.56502	4.4656	4.8845
NM_002158	-0.904619	5.8703	0.327043	FOXN2	6.30265	6.20345	4.01671	6.03232
NM_002168	-0.761665	3.9716	0.444568	IDH2	3.91846	4.60066	3.19839	3.81622
NM_002221	-1.33134	6.8984	0.162426	ITPKB	6.39065	8.00935	5.46046	6.51997
NM_002226	-0.840085	4.93316	0.339874	JAG2	5.20326	5.37778	3.6726	4.96054
NM_002230	-1.02151	5.4622	0.246496	JUP	4.91752	6.45714	4.64003	5.05606
NM_002254	-0.772963	4.36195	0.424253	KIF3C	3.88855	5.19972	4.34399	3.29627
NM_002265	-0.647519	6.04928	0.46745	KPNB1	6.2546	6.41518	4.84243	6.22139
NM_002267	-0.784321	6.45127	0.383311	KPNA3	6.65629	6.91413	5.17609	6.53165
NM_002300	-1.31994	5.14096	0.129811	LDHB	5.98223	5.23231	3.76298	4.74814
NM_002337	-1.0998	4.5965	0.25758	LRPAP1	3.59947	5.74827	3.96264	3.92143
NM_002358	-1.2362	2.37151	0.395047	MAD2L1	3.26888	2.27721	1.14934	1.98649
NM_002375	-0.80925	7.54618	0.374709	MAP4	7.21377	8.35515	6.86738	7.2748
NM_002405	-0.919243	5.03225	0.290299	MFNG	4.76672	5.86197	4.79324	4.12017
NM_002437	-0.645031	4.70409	0.462579	MPV17	4.61666	5.28374	4.0289	4.60386
NM_002489	-0.833018	4.09755	0.422672	NDUFA4	5.02683	3.49175	2.88621	4.1113
NM_002492	-0.73376	3.88099	0.475028	NDUFB5	4.44916	3.8994	2.83157	3.91125
NM_002518	-1.27489	7.956	0.177436	NPAS2	7.70202	8.95022	6.64182	7.57488
NM_002553	-0.691352	6.19034	0.444475	ORC5	6.68122	6.28143	4.94466	6.34
NM_002610	-0.97784	4.53405	0.283442	PDK1	5.08074	4.78769	3.32905	4.40777
NM_002618	-0.676553	4.56911	0.440161	PEX13	4.90761	4.82021	4.00029	4.35615
NM_002627	-0.724942	6.9761	0.420866	PFKP	6.52796	7.79021	6.41671	6.70523
NM_002688	-1.26675	1.91103	0.420776	2005-09-01	1.94366	2.75199	0.614622	1.53459
NM_002703	-0.869806	4.37007	0.342346	PPAT	4.78848	4.68548	3.59271	4.10238
NM_002708	-0.805869	3.39687	0.471885	PPP1CA	3.75124	3.72718	2.5896	3.21582
NM_002717	-0.80342	8.33806	0.427745	PPP2R2A	8.74258	8.62471	6.12358	8.65098
NM_002737	-0.936415	8.41955	0.323647	PRKCA	7.80369	9.40084	7.946	7.80334
NM_002752	-0.876763	5.28467	0.297508	MAPK9	5.41041	5.86716	4.34724	5.11491
NM_002755	-0.752713	6.0509	0.41758	MAP2K1	5.2073	7.01357	5.9193	5.25032
NM_002775	-0.753895	6.9746	0.386971	HTRA1	7.17092	7.42297	6.24963	6.79657
NM_002819	-0.863436	5.4071	0.316343	PTBP1	5.19513	6.18692	4.47751	5.24628
NM_002830	-0.70639	7.4088	0.435512	PTPN4	7.57317	7.8518	6.28987	7.49276
NM_002833	-0.680615	5.42492	0.42589	PTPN9	4.9991	6.20345	4.92305	5.1543
NM_002845	-0.744984	9.61955	0.43931	PTPRM	9.74324	10.1212	8.10539	9.81473
NM_002859	-0.998591	6.43568	0.276329	PXN	5.82528	7.44226	5.93451	5.76184
NM_002862	-0.753786	5.18796	0.37307	PYGB	5.03596	5.86976	4.98695	4.48532
NM_002874	-0.619608	6.12364	0.495825	RAD23B	6.57254	6.2055	4.82855	6.35134
NM_002881	-0.886309	6.21916	0.323681	RALB	6.24085	6.87983	5.02397	6.1732
NM_002892	-0.704902	6.06411	0.455036	ARID4A	6.52796	6.20345	4.28759	6.36446
NM_002973	-0.675596	6.8925	0.452805	ATXN2	6.7242	7.54311	5.91274	6.93995
NM_003022	-0.717113	6.80435	0.4613	SH3BGRL	7.32591	6.87855	4.80511	7.14286
NM_003025	-0.779238	4.95417	0.379169	SH3GL1	4.40053	5.83304	4.68182	4.31039
NM_003033	-0.734211	7.58293	0.418059	ST3GAL1	7.62474	8.13747	6.59679	7.57891
NM_003036	-1.71976	6.5523	0.0848971	SKI	5.45532	7.93149	5.51927	5.37781
NM_003082	-0.690366	5.70986	0.454639	SNAPC1	6.27786	5.69373	3.94987	6.01816
NM_003086	-0.676677	4.44837	0.47107	SNAPC4	3.87844	5.27595	4.30441	3.77189
NM_003088	-0.980419	4.52617	0.315539	FSCN1	3.64789	5.60319	3.52545	4.28696
NM_003100	-0.69093	5.36303	0.452081	SNX2	6.02181	5.19972	3.71347	5.64381
NM_003144	-1.02751	4.27439	0.276161	SSR1	4.75018	4.6437	3.18393	4.03832
NM_003174	-1.03126	8.4159	0.273535	SVIL	8.03974	9.35349	7.46671	8.08731
NM_003189	-0.738734	4.63578	0.406691	TAL1	4.62273	5.22828	3.74338	4.57835
NM_003205	-0.711923	9.93746	0.484455	TCF12	10.3221	10.1742	7.80125	10.3038
NM_003252	-0.635703	5.66467	0.469829	TIAL1	6.14078	5.72555	4.35048	5.88662
NM_003255	-0.670646	5.57027	0.426654	TIMP2	5.27052	6.28532	5.00558	5.36295
NM_003286	-0.653242	7.02247	0.47816	TOP1	7.1448	7.463	5.6487	7.24875
NM_003298	-0.691117	6.52995	0.444285	NR2C2	6.5631	7.0631	5.31036	6.66943
NM_003325	-0.68137	6.16605	0.437064	HIRA	5.90713	6.86692	5.77835	5.7899
NM_003335	-0.964501	3.49543	0.385922	UBA7	4.18775	3.53157	2.42711	3.31184
NM_003339	-0.717229	5.77814	0.410194	UBE2D2	5.62215	6.44677	4.67407	5.84711
NM_003342	-0.963412	5.94834	0.27742	UBE2G1	5.49557	6.88368	5.15585	5.58737
NM_003350	-0.63024	4.56819	0.474714	UBE2V2	4.55451	5.08842	3.9584	4.43645
NM_003374	-0.878402	5.43301	0.297527	VDAC1	5.33848	6.15752	4.65322	5.15861
NM_003395	-1.3485	4.79174	0.145135	WNT9A	4.41459	5.86457	3.5197	4.31039
NM_003400	-0.665379	6.76419	0.487192	XPO1	7.03871	7.07998	4.90552	7.11207
NM_003403	-0.748799	4.93639	0.38694	YY1	4.91257	5.54276	4.01671	4.8845
NM_003434	-0.606817	5.90508	0.498437	ZNF133	6.34181	5.99136	4.52133	6.1732
NM_003467	-1.84756	2.32318	0.250493	CXCR4	1.73537	3.64484	-0.500627	1.90673
NM_003472	-0.694085	5.98834	0.443944	DEK	6.35281	6.23394	4.48638	6.22345
NM_003483	-1.11601	8.52678	0.242736	HMGA2	7.9913	9.56015	8.08874	7.59569
NM_003569	-0.900862	6.69429	0.343456	STX7	7.49012	6.49288	5.00763	6.81307
NM_003581	-0.847613	7.0924	0.346656	NCK2	7.0878	7.74716	6.01334	7.0274
NM_003584	-0.787206	4.23774	0.407435	DUSP11	4.73905	4.39295	3.33561	4.13774
NM_003588	-0.634804	5.63884	0.451205	CUL4B	6.14921	5.64917	4.79562	5.653
NM_003620	-0.699503	5.70795	0.424204	PPM1D	5.85395	6.16176	4.38883	5.8788
NM_003633	-0.716468	5.71964	0.394271	ENC1	6.05136	6.01496	4.80037	5.69812
NM_003654	-2.23522	5.54217	0.0308421	CHST1	4.02313	7.10439	4.14922	3.90099
NM_003677	-1.09579	4.37538	0.240488	DENR	4.22812	5.23633	3.74338	3.70273
NM_003718	-0.732822	7.01054	0.422449	CDK13	7.07458	7.54879	5.71812	7.14177
NM_003754	-0.879918	5.02128	0.382995	EIF3F	6.04911	4.17558	2.98965	5.24628
NM_003762	-0.758313	4.14391	0.448001	VAMP4	4.88254	3.8994	3.01439	4.18921
NM_003810	-0.80171	3.43924	0.478591	TNFSF10	4.28281	2.99924	2.67485	3.23227
NM_003812	-0.601047	6.7451	0.489839	ADAM23	6.68992	7.27832	6.1302	6.64966
NM_003818	-0.662709	5.33115	0.42901	CDS2	5.21134	5.94296	4.7149	5.17147
NM_003825	-0.650895	5.74771	0.448931	SNAP23	5.5697	6.38832	4.81922	5.79268
NM_003841	-0.885454	4.79743	0.342487	TNFRSF10C	4.52241	5.62176	3.36156	4.85293
NM_003852	-0.66894	6.33964	0.453249	TRIM24	6.36734	6.86172	5.27837	6.4319
NM_003864	-1.41264	2.17438	0.356604	SAP30	3.05213	2.27721	0.525629	1.8223
NM_003873	-0.915234	9.17164	0.344075	NRP1	9.47959	9.63232	7.46335	9.28307
NM_003875	-0.830191	5.54053	0.335212	GMPS	5.79604	5.99136	4.24293	5.59057
NM_003887	-0.778556	8.74294	0.399571	ASAP2	8.59139	9.44474	7.87403	8.63134
NM_003903	-0.657297	5.63439	0.446766	CDC16	6.13654	5.67903	4.47751	5.77874
NM_003909	-0.628844	4.74451	0.483299	CPNE3	5.17048	4.86246	3.59818	4.9103
NM_003927	-0.873183	6.56076	0.332341	MBD2	6.79712	7.05629	5.2299	6.58387
NM_003930	-0.817784	7.6397	0.400884	SKAP2	7.94543	8.03671	5.72688	7.88235
NM_003934	-0.826173	5.95308	0.344345	FUBP3	5.82001	6.67134	4.96384	5.86304
NM_003941	-0.803979	6.73194	0.406382	WASL	7.23869	6.90026	4.70986	7.00961
NM_003959	-1.07395	5.70622	0.210397	HIP1R	5.70458	6.48276	4.58052	5.43934
NM_003968	-0.896538	5.13435	0.304638	UBA3	5.71313	5.28374	3.82956	5.12816
NM_004052	-1.21578	4.42481	0.186748	BNIP3	4.40053	5.27985	3.66741	3.71449
NM_004064	-0.964938	4.6873	0.367362	CDKN1B	5.73851	3.8994	2.20151	4.9306
NM_004095	-0.977083	3.35399	0.43875	EIF4EBP1	2.12564	4.48372	3.41209	1.53459
NM_004096	-0.841131	3.45628	0.443289	EIF4EBP2	3.81624	3.80506	2.72567	3.18234
NM_004109	-0.986938	4.20684	0.305895	FDX1	4.68786	4.54338	3.01439	4.06612
NM_004121	-1.18887	4.38198	0.251063	GGT5	3.40188	5.55891	4.17871	2.83988
NM_004126	-2.06592	6.28179	0.0666659	GNG11	7.64128	5.69665	2.66446	5.75046
NM_004178	-0.88859	3.1032	0.454679	TARBP2	3.22167	3.6807	2.55629	2.60739
NM_004193	-0.649405	6.59994	0.464588	GBF1	6.34181	7.28319	5.83963	6.55146
NM_004204	-0.973872	2.84807	0.45419	PIGQ	2.53903	3.69246	2.79395	1.3659
NM_004232	-0.943369	4.86881	0.287169	SOCS6	5.29733	5.23231	3.53688	4.83149
NM_004234	-0.8971	3.35248	0.457916	ZNF235	4.02313	3.37984	1.51566	3.52716
NM_004242	-0.949395	4.59187	0.306704	HMGN3	5.34216	4.52376	3.26863	4.54581
NM_004257	-0.915679	6.00679	0.296133	TGFBRAP1	6.23294	6.53757	4.80747	5.93517
NM_004260	-1.23006	2.01595	0.429005	RECQL4	1.68984	2.98018	1.53858	0.872966
NM_004261	-0.676414	5.68168	0.438403	2015-09-01	6.13866	5.80353	4.40139	5.85775
NM_004281	-0.791818	5.28969	0.35378	BAG3	5.30867	5.89542	4.2289	5.27038
NM_004300	-0.617491	5.05027	0.481726	ACP1	5.661	4.88825	3.9711	5.19684
NM_004302	-0.852479	5.59929	0.304157	ACVR1B	5.67859	6.19933	4.89	5.3019
NM_004331	-0.739278	4.87923	0.424918	BNIP3L	5.50545	4.82021	3.32246	5.09706
NM_004365	-0.99055	3.42756	0.409312	CETN3	4.46275	2.72933	1.80754	3.4589
NM_004375	-1.80997	1.61113	0.280956	COX11	2.58949	1.75623	0.478986	0.376961
NM_004380	-0.621422	7.08551	0.485193	CREBBP	7.12783	7.56487	6.17386	7.14829
NM_004383	-0.688935	4.43825	0.457162	CSK	3.96698	5.23633	4.049	4.04765
NM_004395	-0.841226	4.85939	0.341651	DBN1	4.43543	5.71982	4.45057	4.29481
NM_004423	-0.857245	3.91192	0.397547	DVL3	3.61173	4.72036	3.55947	3.24854
NM_004454	-1.1209	5.24073	0.242174	ETV5	4.3502	6.37379	5.11449	3.67892
NM_004468	-1.01512	4.68066	0.261622	FHL3	4.62273	5.45919	3.52545	4.49216
NM_004520	-0.861682	6.47688	0.352026	KIF2A	6.81711	6.8721	4.85162	6.61086
NM_004528	-0.986276	4.65005	0.275056	MGST3	5.28207	4.79861	3.4367	4.51923
NM_004544	-0.74391	6.18183	0.39463	NDUFA10	6.23888	6.731	5.37229	6.06943
NM_004553	-1.03828	4.48433	0.245628	NDUFS6	4.74462	5.05693	3.82023	3.92143
NM_004578	-1.04812	4.78325	0.229446	RAB4A	5.2353	5.19146	3.7483	4.49216
NM_004596	-0.701026	3.88253	0.491601	SNRPA	3.51062	4.63763	3.63054	3.31184
NM_004598	-1.3046	10.3232	0.175876	SPOCK1	9.86936	11.4054	9.41883	9.62995
NM_004619	-0.768152	4.96325	0.373326	TRAF5	4.81523	5.65519	4.14549	4.83149
NM_004622	-0.811239	3.41946	0.46902	TSN	4.01392	3.46457	2.48727	3.31184
NM_004642	-1.21365	3.71535	0.260578	CDK2AP1	3.4708	4.66772	3.32905	2.50277
NM_004663	-0.778353	4.25858	0.41704	RAB11A	4.70512	4.47694	3.10933	4.29481
NM_004689	-0.736593	6.2759	0.429018	MTA1	5.38207	7.24577	6.03264	5.66214
NM_004696	-0.979923	3.93813	0.328555	SLC16A4	3.95741	4.64974	2.98965	3.66687
NM_004712	-0.628534	5.43046	0.457746	HGS	5.09827	6.13616	4.96384	5.18843
NM_004715	-0.687019	5.45352	0.413515	CTDP1	5.18286	6.16176	5.13531	4.99469
NM_004739	-0.617142	4.72805	0.491317	MTA2	4.84668	5.14515	3.60362	4.89488
NM_004760	-0.783642	6.00346	0.384647	STK17A	6.18452	6.48614	4.56943	6.14306
NM_004775	-0.731846	5.57477	0.38826	B4GALT6	5.96561	5.8197	4.50978	5.61273
NM_004808	-0.760759	6.79346	0.421928	NMT2	7.34439	6.86562	5.05809	7.03914
NM_004824	-0.808476	7.73939	0.374353	CDYL	7.74855	8.36207	6.71911	7.68207
NM_004838	-0.721909	3.80493	0.483012	HOMER3	3.53657	4.52376	3.42445	3.35755
NM_004863	-0.777282	6.23972	0.372038	SPTLC2	6.53119	6.61993	5.34816	6.14306
NM_004882	-0.710382	5.10881	0.419215	CIR1	5.64618	5.15368	3.85717	5.24628
NM_004897	-0.983285	4.65445	0.261273	MINPP1	4.84149	5.25231	3.9795	4.17226
NM_004911	-0.943281	4.23717	0.35912	PDIA4	3.53657	5.23633	4.20402	2.83988
NM_004939	-0.772732	6.36623	0.400011	DDX1	6.88181	6.49624	4.89	6.52833
NM_005003	-0.763733	3.76124	0.458998	NDUFAB1	3.69474	4.39295	3.30251	3.34247
NM_005006	-0.657666	5.24704	0.447267	NDUFS1	5.30112	5.74262	4.08838	5.39253
NM_005011	-0.693867	6.41358	0.42799	NRF1	6.23888	7.07774	5.78914	6.22756
NM_005012	-0.799352	8.73508	0.399424	ROR1	8.97888	9.17483	7.28716	8.86393
NM_005015	-0.74151	4.58018	0.437	OXA1L	5.27438	4.40729	3.05471	4.78764
NM_005028	-0.688424	7.77108	0.468569	PIP4K2A	8.0877	8.06186	6.20196	8.02847
NM_005050	-1.00555	4.37631	0.280451	ABCD4	4.29045	5.16216	3.57619	3.97129
NM_005063	-0.830877	5.16305	0.335126	SCD	5.71313	5.29536	4.01262	5.14998
NM_005077	-0.978474	6.94046	0.279841	TLE1	6.74938	7.77023	5.88729	6.73151
NM_005107	-0.754833	4.99076	0.392906	EXOG	5.49557	5.11924	3.69828	5.10601
NM_005127	-1.19814	4.07989	0.323115	CLEC2B	5.33108	2.81789	1.23604	4.19762
NM_005188	-0.722262	6.12881	0.422023	CBL	6.11948	6.7109	4.96384	6.21933
NM_005189	-1.22295	2.22153	0.411179	CBX2	2.19245	3.07307	1.17882	1.73263
NM_005206	-0.834052	5.05496	0.354088	CRK	4.28281	6.03588	4.42003	4.71925
NM_005216	-0.837416	3.6603	0.422903	DDOST	3.76228	4.225	3.11696	3.23227
NM_005230	-1.14515	8.53764	0.23113	ELK3	8.64046	9.28694	6.90701	8.42182
NM_005234	-1.02117	3.12012	0.421764	NR2F6	2.45988	4.12441	3.10165	1.42435
NM_005271	-0.729017	4.60924	0.402028	GLUD1	4.96129	4.88825	3.9711	4.39321
NM_005308	-1.09791	7.7519	0.273891	GRK5	6.62186	8.9336	7.45018	6.63736
NM_005313	-0.909395	4.27034	0.341516	PDIA3	4.24396	4.97265	3.2269	4.12898
NM_005336	-0.819162	7.22597	0.364236	HDLBP	7.07569	7.94997	6.28141	7.11762
NM_005339	-1.02917	6.54267	0.253715	UBE2K	6.37095	7.38815	5.4393	6.30931
NM_005349	-0.637311	6.44465	0.476626	RBPJ	6.50185	6.92414	5.33185	6.58707
NM_005385	-1.28034	4.2498	0.194452	NKTR	4.42157	5.02474	2.654	4.0004
NM_005388	-0.965973	4.35609	0.343525	PDCL	5.19105	4.15023	2.42711	4.49216
NM_005389	-0.774028	4.91344	0.372583	PCMT1	4.87747	5.54276	4.01262	4.82608
NM_005400	-0.638576	9.00927	0.483097	PRKCE	8.96042	9.56375	8.34754	8.90812
NM_005401	-0.658766	8.65143	0.480134	PTPN14	8.68464	9.163	7.50249	8.78945
NM_005402	-0.731809	9.27335	0.484729	RALA	9.41351	9.75357	6.7835	9.6801
NM_005415	-0.905673	6.69781	0.331731	SLC20A1	7.21679	6.9316	4.99526	6.81717
NM_005424	-0.737809	6.78946	0.411499	TIE1	6.37095	7.59807	6.11216	6.59505
NM_005434	-0.798362	5.51319	0.335083	MALL	5.82528	5.88777	4.7048	5.34414
NM_005445	-0.993546	5.43036	0.294239	SMC3	6.32702	5.11488	3.4906	5.5419
NM_005447	-1.51949	5.13225	0.151457	RASSF9	6.32516	4.58813	2.12783	5.0043
NM_005475	-1.62433	6.95391	0.103288	SH2B3	5.87698	8.30241	5.91384	5.93517
NM_005513	-0.604508	4.85492	0.489488	GTF2E1	5.32365	4.89335	3.94987	4.9306
NM_005523	-1.52834	1.03561	0.404282	HOXA11	1.54395	1.61509	-0.324826	0.376961
NM_005529	-0.762136	9.83038	0.440574	HSPG2	9.81904	10.4385	8.08095	10.077
NM_005556	-1.80961	5.52603	0.0645104	KRT7	4.40758	6.93284	4.61867	4.02893
NM_005573	-0.783249	5.32182	0.356508	LMNB1	5.51853	5.78991	4.27058	5.30579
NM_005574	-0.643203	5.09558	0.49223	LMO2	5.96561	4.38573	3.77751	5.31354
NM_005583	-2.36826	1.56921	0.175986	LYL1	2.12564	2.45341	0.430784	-0.855549
NM_005607	-0.778709	10.0652	0.420834	PTK2	10.223	10.5624	8.5026	10.2473
NM_005611	-0.645579	5.36083	0.447852	RBL2	5.6873	5.6063	4.33092	5.46044
NM_005612	-0.694202	4.21145	0.473318	REST	4.08598	4.84676	3.24095	4.23891
NM_005632	-0.741025	4.42405	0.439944	CAPN15	3.65975	5.35206	4.20402	3.76059
NM_005657	-0.636159	5.96328	0.45512	TP53BP1	5.90464	6.52118	5.2953	5.86831
NM_005662	-0.692772	4.44943	0.468888	VDAC3	5.17048	4.16718	3.27547	4.5719
NM_005669	-1.04545	4.67648	0.235592	REEP5	5.18286	5.02474	3.60905	4.40777
NM_005723	-1.10965	8.50077	0.230165	TSPAN5	8.40279	9.34792	7.55579	8.08051
NM_005730	-1.06656	5.45824	0.214765	CTDSP2	5.81737	5.96978	4.09225	5.3174
NM_005733	-1.12807	3.09231	0.3637	KIF20A	3.97649	2.94129	1.66897	2.92332
NM_005779	-1.20048	7.7075	0.197443	LHFPL2	7.42649	8.68149	6.60767	7.28568
NM_005786	-1.1001	5.95146	0.203301	TSHZ1	6.40832	6.39013	4.7149	5.71578
NM_005792	-0.724445	5.2955	0.383661	MPHOSPH6	5.57909	5.64312	4.51556	5.18421
NM_005796	-0.626458	4.54073	0.48731	NUTF2	4.17128	5.26023	4.06882	4.30262
NM_005808	-0.805156	7.24279	0.382181	CTDSPL	7.44287	7.72372	5.84193	7.35117
NM_005828	-1.16592	4.74858	0.182914	DCAF7	4.84149	5.51323	3.78232	4.27906
NM_005845	-0.828605	7.1928	0.371409	ABCC4	6.4969	8.14925	6.81024	6.62183
NM_005858	-0.675362	4.36732	0.473836	AKAP8	3.88855	5.16216	3.86173	4.10238
NM_005868	-0.998628	4.24687	0.316693	BET1	5.14119	3.93942	2.90397	4.16371
NM_005895	-0.87329	6.13905	0.338769	GOLGA3	5.51201	7.09335	5.70678	5.56156
NM_005896	-1.10753	4.81996	0.263268	IDH1	5.84619	4.30377	2.90397	4.83149
NM_005898	-0.838994	6.87299	0.365671	CAPRIN1	7.23374	7.23174	5.27667	7.01675
NM_005900	-0.94163	8.31364	0.380785	SMAD1	8.68247	8.73577	5.36589	8.62473
NM_005909	-0.638802	8.60271	0.49763	MAP1B	8.78277	8.9844	7.288	8.82004
NM_005911	-0.664404	4.38028	0.493773	MAT2A	5.04954	4.16718	3.10933	4.56542
NM_005917	-0.779456	4.81622	0.434881	MDH1	5.57284	4.56912	2.69539	5.13693
NM_005927	-0.756213	4.97709	0.426233	MFAP3	5.75794	4.64974	3.2269	5.23408
NM_005983	-1.06729	4.9126	0.22901	SKP2	5.67567	4.92858	3.6252	4.73665
NM_005993	-1.36377	7.46922	0.179316	TBCD	6.25068	8.76217	6.9125	6.28191
NM_006010	-1.10579	2.62152	0.414287	MANF	2.45988	3.49175	1.58337	2.2676
NM_006015	-0.791794	7.17675	0.393566	ARID1A	7.11605	7.83399	5.78196	7.29452
NM_006019	-0.952858	4.22888	0.322854	TCIRG1	4.13776	4.99181	3.2269	4.01949
NM_006023	-0.619377	5.40568	0.468206	CDC123	5.65213	5.71118	4.38251	5.5253
NM_006033	-1.19823	5.45858	0.192017	LIPG	4.59212	6.61839	4.94037	4.49898
NM_006035	-0.803158	6.74778	0.370343	CDC42BPB	6.35098	7.58156	6.06951	6.48264
NM_006052	-0.725354	5.50045	0.390882	DSCR3	5.75242	5.88008	4.46859	5.52864
NM_006054	-0.892138	5.31963	0.296597	RTN3	5.48561	5.88264	4.18235	5.24222
NM_006117	-1.09878	2.0089	0.476475	ECI2	2.22473	2.61041	1.42013	1.24138
NM_006148	-0.78975	5.85041	0.366095	LASP1	5.4209	6.69052	5.1202	5.63765
NM_006153	-0.722488	6.51875	0.418672	NCK1	6.57567	7.05515	5.40384	6.58707
NM_006166	-0.817027	4.48727	0.368046	NFYB	5.06745	4.56273	3.58722	4.35615
NM_006185	-0.700327	6.3542	0.420894	NUMA1	6.51822	6.79239	5.53075	6.29372
NM_006221	-0.900082	2.95326	0.470388	PIN1	2.51313	3.8372	2.42711	2.41901
NM_006243	-1.02904	6.04248	0.257551	PPP2R5A	6.37095	6.55861	4.42619	6.02997
NM_006249	-1.30436	1.29375	0.476762	PRB3	1.94366	1.61509	-0.168139	0.954559
NM_006253	-1.08919	3.74599	0.301078	PRKAB1	4.0504	4.31902	2.42711	3.56663
NM_006255	-0.772406	8.96591	0.415511	PRKCH	9.22515	9.37326	7.52706	9.11442
NM_006260	-0.731792	6.23981	0.405782	DNAJC3	6.17216	6.86432	5.39602	6.16036
NM_006305	-1.12436	5.85313	0.198118	ANP32A	5.79872	6.68465	4.64532	5.57775
NM_006307	-0.735251	5.64538	0.38464	SRPX	5.39631	6.37013	5.43625	4.98502
NM_006320	-1.32668	4.45339	0.158742	PGRMC2	5.06745	4.86765	2.84082	4.16371
NM_006330	-1.04168	5.79032	0.221844	LYPLA1	5.80674	6.5392	4.7497	5.50851
NM_006342	-0.821609	4.66062	0.353805	TACC3	4.64078	5.30688	3.86626	4.4576
NM_006343	-0.942517	7.36847	0.313324	MERTK	7.17403	8.18194	6.03567	7.32839
NM_006355	-0.6586	4.94388	0.482959	TRIM38	5.5315	4.86765	3.23394	5.26639
NM_006392	-1.09865	3.62722	0.301972	NOP56	4.01392	4.12441	2.84082	3.09507
NM_006401	-0.791357	5.1633	0.347256	ANP32B	5.48227	5.52643	4.24293	5.06985
NM_006407	-1.00575	4.81455	0.25392	ARL6IP5	5.3049	5.15368	3.68293	4.6227
NM_006432	-0.779111	3.85576	0.490761	NPC2	4.71652	3.37984	1.8263	4.16371
NM_006440	-0.857093	6.56541	0.341303	TXNRD2	6.67831	7.14668	5.29024	6.58066
NM_006445	-0.633036	4.42933	0.484893	PRPF8	4.34287	4.99656	4.01671	4.12898
NM_006454	-1.04224	5.37258	0.229843	MXD4	4.96129	6.32741	4.68182	4.83149
NM_006467	-0.877815	4.24522	0.35122	POLR3G	4.24396	4.90856	3.67778	3.79422
NM_006504	-0.825023	8.73016	0.399314	PTPRE	8.44622	9.52564	7.17641	8.8715
NM_006506	-0.642914	8.43021	0.494594	RASA2	8.65682	8.77328	7.11148	8.64561
NM_006527	-1.09922	3.94044	0.272969	SLBP	4.25962	4.50388	2.86822	3.61762
NM_006540	-0.656487	7.07153	0.462705	NCOA2	7.15635	7.54311	6.07148	7.14612
NM_006544	-0.805698	6.70685	0.405481	EXOC5	7.26124	6.81408	4.69718	6.98069
NM_006547	-0.820764	8.25185	0.3763	IGF2BP3	8.22818	8.90293	7.152	8.22213
NM_006554	-0.737719	7.52806	0.46402	MTX2	8.05441	7.61361	5.3087	7.8908
NM_006560	-0.83831	6.95694	0.363147	CELF1	6.93521	7.61747	5.56604	7.03328
NM_006567	-0.689549	7.84642	0.441328	FARS2	7.7423	8.46763	7.26241	7.6349
NM_006577	-0.709474	4.16125	0.452915	B3GNT2	4.42852	4.50388	3.74338	3.77189
NM_006613	-1.61177	5.75127	0.0790185	GRAP	5.15382	6.98636	4.50978	4.92555
NM_006617	-1.29525	3.86016	0.224049	NES	3.54937	4.88825	2.45148	3.51377
NM_006618	-0.635032	6.61964	0.490781	KDM5B	6.73824	7.05059	5.17426	6.88378
NM_006634	-1.00891	3.61851	0.347272	VAMP5	3.98594	4.08034	2.67485	3.31184
NM_006642	-0.842342	7.79646	0.353432	SDCCAG8	7.53747	8.58859	7.20982	7.41201
NM_006646	-0.656964	7.63044	0.49791	WASF3	8.04766	7.78472	5.85683	7.96466
NM_006654	-0.702218	6.71921	0.440043	FRS2	6.82897	7.20325	5.40384	6.88508
NM_006660	-0.8071	4.62849	0.368735	CLPX	5.09391	4.84676	3.57619	4.59116
NM_006698	-1.75721	4.55202	0.0570904	BLCAP	4.68786	5.54601	3.04674	3.72615
NM_006708	-0.836127	4.59475	0.345528	GLO1	5.04954	4.84676	3.6726	4.4576
NM_006716	-0.655346	4.73547	0.468253	DBF4	5.29353	4.6972	3.58722	4.87929
NM_006717	-0.743348	6.56709	0.414455	SPIN1	6.69569	7.06423	5.19965	6.71697
NM_006733	-0.735013	4.88031	0.392968	CENPI	5.09391	5.29921	4.01671	4.80973
NM_006751	-1.1399	8.17517	0.307867	SSFA2	9.26716	7.48683	5.2104	8.34021
NM_006761	-0.741032	5.73464	0.389562	YWHAE	5.31618	6.54408	5.06797	5.52864
NM_006767	-0.78412	3.84281	0.45686	LZTR1	3.29951	4.70883	3.77751	2.83988
NM_006769	-1.13117	4.36382	0.244615	LMO4	5.21134	4.28836	2.87724	4.21428
NM_006784	-0.874793	3.82746	0.392938	WDR3	4.4962	3.81586	3.03066	3.56663
NM_006810	-0.983441	7.1013	0.284186	PDIA5	6.60049	8.06412	6.40428	6.64044
NM_006817	-0.917254	3.27512	0.425712	ERP29	3.72891	3.57032	2.76509	2.70493
NM_006826	-0.638936	6.80048	0.485556	YWHAQ	6.82897	7.3025	5.4739	7.02268
NM_006867	-0.622814	7.06281	0.482899	RBPMS	7.04776	7.58393	6.22069	7.08742
NM_006927	-0.689677	5.3892	0.42227	ST3GAL2	4.90761	6.19521	5.04013	4.96054
NM_006982	-1.14504	4.43081	0.317113	ALX1	5.45872	3.96873	1.14934	4.63513
NM_006999	-0.957728	6.51528	0.288545	PAPD7	6.59432	7.17943	5.20325	6.45311
NM_007006	-0.839135	4.22189	0.397161	NUDT21	4.74462	4.40014	2.74551	4.33346
NM_007013	-0.648572	7.22351	0.472837	WWP1	7.34439	7.66151	6.12358	7.35023
NM_007026	-1.21442	3.89961	0.225722	DUSP14	4.22014	4.52376	3.06264	3.26463
NM_007045	-0.991835	5.41261	0.259002	FGFR1OP	5.55708	6.05195	3.9584	5.37781
NM_007062	-0.679496	5.37539	0.419572	PWP1	5.62517	5.72269	4.4566	5.38886
NM_007080	-0.809135	4.58238	0.393874	LSM6	5.45532	4.09813	3.38704	4.61017
NM_007107	-1.10274	7.16379	0.275367	SSR3	8.12238	6.81811	4.94681	7.24369
NM_007111	-0.673821	5.59588	0.434868	TFDP1	5.14541	6.37925	5.49896	4.86353
NM_007118	-0.685345	10.7413	0.479269	TRIO	10.7742	11.2706	9.25904	10.975
NM_007131	-0.631327	5.92045	0.475779	ZNF75D	6.20893	6.19521	4.63206	6.13652
NM_007144	-0.886332	3.89709	0.394775	PCGF2	3.38769	4.80404	3.7185	2.92332
NM_007172	-0.620212	4.85505	0.482668	NUP50	5.25497	4.99656	3.78711	4.99469
NM_007176	-1.06423	3.49258	0.363093	C14orf1	4.55451	2.79625	2.25785	3.29627
NM_007184	-1.06436	6.45221	0.241018	NISCH	6.33813	7.28611	5.18701	6.26602
NM_007212	-0.749892	5.17935	0.371309	RNF2	5.41741	5.58753	4.34073	5.07898
NM_007235	-0.89313	5.35465	0.286343	XPOT	5.65805	5.80353	4.38251	5.18843
NM_007254	-0.859214	3.06753	0.477115	PNKP	2.75336	3.87896	2.52219	2.60739
NM_007257	-1.21414	1.89239	0.446006	PNMA2	1.59424	2.81789	1.64804	0.253432
NM_007271	-0.621163	5.74746	0.474387	STK38	5.74687	6.25788	4.59699	5.92001
NM_007276	-0.755352	5.35022	0.392719	CBX3	5.968	5.31831	3.98368	5.49153
NM_007284	-1.04815	3.45563	0.352124	TWF2	3.08767	4.38573	2.96448	2.68115
NM_007313	-1.03065	7.02156	0.278232	ABL1	6.1323	8.12233	6.4511	6.37932
NM_007315	-0.937103	6.19102	0.341674	STAT1	7.17506	5.5717	4.43538	6.29959
NM_007342	-0.617396	4.73352	0.476324	NUPL2	4.9991	5.0154	3.99615	4.70163
NM_007346	-1.10514	2.6972	0.395838	OGFR	2.77533	3.42283	2.00152	2.06206
NM_007357	-0.69213	4.66354	0.44008	COG2	5.21937	4.66175	3.69828	4.68977
NM_007371	-0.847007	4.71309	0.340162	BRD3	4.42157	5.51985	4.08449	4.35615
NM_012089	-0.874311	4.56505	0.321743	ABCB10	4.71652	5.12359	3.87979	4.22254
NM_012096	-0.732572	4.73401	0.416721	APPL1	5.19513	4.89844	3.49647	4.8476
NM_012157	-0.741025	7.21416	0.428812	FBXL2	7.34989	7.70425	5.66312	7.4246
NM_012179	-0.796441	4.90953	0.399874	FBXO7	5.5315	4.91359	3.04674	5.16291
NM_012214	-1.09852	7.28718	0.235768	MGAT4A	7.33703	8.0459	5.81754	7.15586
NM_012232	-0.769357	5.30043	0.362063	PTRF	5.06299	6.03819	4.97229	4.74241
NM_012287	-0.616261	6.49906	0.48761	ACAP2	6.55994	6.96107	5.47984	6.61871
NM_012288	-1.36254	7.42043	0.135999	TRAM2	7.52861	8.27041	6.07148	6.96231
NM_012293	-0.635402	6.77987	0.480445	PXDN	6.32702	7.54717	6.07834	6.70818
NM_012300	-0.673758	7.34521	0.461562	FBXW11	7.40815	7.84523	6.14801	7.4902
NM_012304	-0.878897	10.818	0.392613	FBXL7	11.0948	11.2822	8.52465	11.0871
NM_012311	-0.721822	4.63102	0.421325	KIN	5.08514	4.79316	3.58171	4.67178
NM_012321	-0.842642	3.86643	0.408802	LSM4	3.71761	4.58813	3.61984	3.07697
NM_012334	-0.777748	8.74005	0.41565	MYO10	8.3337	9.56535	7.61698	8.76103
NM_012338	-0.659143	4.82107	0.451761	TSPAN12	4.53534	5.51985	4.35048	4.54581
NM_012339	-2.03964	6.24511	0.0580622	TSPAN15	4.55451	7.78541	5.10492	4.6413
NM_012383	-0.906601	5.87587	0.302983	OSTF1	6.35098	6.16176	4.4952	5.88922
NM_012401	-0.898579	4.52019	0.325857	PLXNB2	4.17954	5.37413	3.98785	4.00997
NM_012419	-0.842438	5.4355	0.324656	RGS17	5.06299	6.27753	4.85162	5.04678
NM_012425	-0.865886	7.2591	0.335453	RSU1	7.03189	8.04819	6.53115	6.96108
NM_012426	-0.613001	6.30374	0.492237	SF3B3	6.51822	6.63524	5.17426	6.47402
NM_012453	-0.830806	3.40546	0.455209	TBL2	3.4708	3.98794	2.92152	2.92332
NM_012474	-0.713142	6.36128	0.425243	UCK2	5.89715	7.17524	5.80459	6.10113
NM_012479	-0.789004	5.79448	0.354053	YWHAG	5.79872	6.40807	4.83551	5.72453
NM_013236	-0.780224	7.48656	0.388814	ATXN10	7.45738	8.11689	6.49864	7.43973
NM_013253	-0.787721	6.50934	0.381027	DKK3	6.50185	7.13056	5.33512	6.54489
NM_013262	-0.710353	5.57014	0.473544	MYLIP	6.44988	4.93849	3.44279	5.94018
NM_013275	-1.35838	7.64914	0.171716	ANKRD11	6.66808	8.89436	7.03947	6.54982
NM_013291	-0.744138	4.10525	0.452111	CPSF1	3.67151	4.91359	3.8249	3.51377
NM_013432	-0.858108	3.14787	0.465655	TONSL	3.15622	3.78324	2.61139	2.68115
NM_013446	-0.775526	3.82851	0.449181	MKRN1	3.95741	4.3416	2.93022	3.73772
NM_013449	-0.745716	5.41475	0.37361	BAZ2A	5.37489	6.02894	4.69972	5.23816
NM_014011	-0.770395	6.0403	0.401905	SOCS5	6.33443	6.41518	4.42926	6.2459
NM_014030	-0.64345	5.50748	0.468256	GIT1	5.4069	6.09909	4.15665	5.73611
NM_014049	-0.604774	4.75895	0.485624	ACAD9	4.60444	5.35206	4.31772	4.51923
NM_014078	-0.683916	5.33438	0.465134	MRPL13	6.15969	4.80945	3.7483	5.60327
NM_014106	-0.914667	3.47116	0.417292	ZNF770	4.29806	3.21026	2.47543	3.29627
NM_014160	-0.707711	4.63662	0.425769	MKRN2	4.77764	5.0973	3.70843	4.62893
NM_014174	-2.27785	2.36905	0.130376	THYN1	3.72891	1.96454	0.698442	0.954559
NM_014175	-1.13931	3.2729	0.324291	MRPL15	3.76228	3.69246	2.43935	2.72831
NM_014177	-0.870234	3.26424	0.460294	TIMM21	3.95741	3.21026	2.24397	3.14806
NM_014180	-1.15163	5.05757	0.189602	MRPL22	5.53793	5.50659	3.53688	4.90003
NM_014222	-0.99647	3.57926	0.350229	NDUFA8	4.10345	3.85823	2.99795	2.98287
NM_014238	-0.768995	6.88516	0.403774	KSR1	6.18247	7.81462	6.59542	6.28586
NM_014239	-1.48672	4.3932	0.114239	EIF2B2	5.00376	4.90351	2.85915	3.90099
NM_014240	-0.816998	5.70162	0.32854	LIMD1	5.59153	6.39912	5.29024	5.17573
NM_014272	-0.837046	5.68298	0.355853	ADAMTS7	4.77764	6.7022	5.33512	5.05606
NM_014292	-1.02401	2.63198	0.452416	CBX6	2.40459	3.46457	2.41477	1.42435
NM_014294	-0.799698	6.01688	0.395009	TRAM1	6.51659	6.19107	4.16404	6.26202
NM_014305	-0.677721	4.15533	0.479167	TGDS	4.62273	4.25703	3.41209	4.06612
NM_014322	-0.678791	4.99308	0.426115	OPN3	5.39985	5.17479	4.11531	4.98502
NM_014339	-0.692721	3.96748	0.482069	IL17RA	4.21211	4.31142	3.78711	3.31184
NM_014346	-0.760904	7.98818	0.421681	TBC1D22A	7.27093	8.91897	7.78756	7.2837
NM_014369	-0.76437	3.3736	0.497091	PTPN18	3.67151	3.72718	2.64347	3.18234
NM_014371	-0.850207	5.25683	0.314928	AKAP8L	4.9991	6.04966	4.75949	4.77646
NM_014384	-1.10745	2.38589	0.439184	ACAD8	2.40459	3.16033	1.23604	2.09842
NM_014390	-0.782587	9.22833	0.398635	SND1	9.10428	9.91706	8.30201	9.1457
NM_014399	-1.36083	4.09329	0.182276	TSPAN13	5.14541	3.78324	2.74551	3.64245
NM_014456	-0.924292	5.69099	0.353719	PDCD4	6.5694	5.3409	3.27547	5.95016
NM_014462	-0.856383	3.577	0.422481	LSM1	4.07717	3.78324	2.81288	3.31184
NM_014467	-0.66263	6.23421	0.456033	SRPX2	5.79335	7.01005	5.88282	5.84443
NM_014480	-0.717233	5.43706	0.389119	ZNF544	5.37489	6.04737	4.81687	5.22177
NM_014494	-0.923413	7.67391	0.329049	TNRC6A	7.93388	8.18194	6.02353	7.76215
NM_014502	-0.872456	4.63403	0.323722	PRPF19	5.17048	4.81484	3.78232	4.41499
NM_014521	-1.2214	7.6149	0.185147	SH3BP4	7.7416	8.38716	6.24789	7.31687
NM_014547	-0.67834	6.21105	0.444642	TMOD3	6.51659	6.5046	5.13531	6.30154
NM_014550	-0.631781	4.3565	0.499435	CARD10	3.99533	5.07051	4.16035	3.81622
NM_014563	-0.827212	3.42837	0.455678	TRAPPC2	3.91846	3.62043	2.72567	3.14806
NM_014585	-1.36473	4.27116	0.263153	SLC40A1	5.71598	1.66368	2.42711	4.02893
NM_014612	-0.899715	7.04734	0.315877	FAM120A	7.03303	7.73797	6.00307	6.91341
NM_014630	-0.626116	5.22381	0.460656	ZNF592	4.87747	5.93308	4.94466	4.79873
NM_014637	-0.611449	4.73113	0.478334	MTFR1	4.79387	5.18315	4.16772	4.58477
NM_014643	-0.889929	6.66685	0.320268	ZNF516	6.37635	7.4986	5.84309	6.41037
NM_014661	-1.18006	6.18256	0.221338	FAM53B	5.26665	7.34782	5.79392	5.06067
NM_014671	-0.838216	7.26241	0.353055	UBE3C	7.15216	7.97486	6.30583	7.14177
NM_014674	-0.829659	5.57698	0.344897	EDEM1	5.39276	6.32552	4.33092	5.60643
NM_014680	-0.702421	4.91021	0.41395	KIAA0100	4.92736	5.45919	4.09612	4.84225
NM_014686	-0.911452	6.61937	0.316114	KIAA0355	6.38351	7.43702	5.47539	6.52499
NM_014688	-0.833734	7.70848	0.382183	USP6NL	7.86706	8.24118	6.03668	7.87779
NM_014698	-0.733937	4.50675	0.419479	TMEM63A	4.24396	5.23633	3.9753	4.19762
NM_014704	-0.899808	4.34859	0.339954	CEP104	4.01392	5.19972	3.8249	3.82709
NM_014705	-0.810129	11.6821	0.4215	DOCK4	11.9847	12.0759	9.63784	11.9575
NM_014713	-1.36164	4.49159	0.147393	LAPTM4A	5.32737	4.62541	2.96448	4.12898
NM_014723	-0.72905	4.65637	0.439527	SNPH	4.0504	5.52314	4.7324	3.47281
NM_014730	-1.24359	3.68739	0.249053	MLEC	3.70622	4.53687	2.32532	3.37247
NM_014734	-0.60287	6.48355	0.493459	SUSD6	6.18247	7.1605	5.95169	6.32474
NM_014737	-0.949105	5.0078	0.295796	RASSF2	4.34287	6.01027	4.05696	4.77084
NM_014746	-1.03479	5.45547	0.258007	RNF144A	4.57969	6.55217	5.10492	4.52592
NM_014752	-0.645213	5.02548	0.455226	SPCS2	5.55708	5.0154	4.03698	5.10601
NM_014763	-1.12649	3.11694	0.348375	MRPL19	3.95741	3.03663	2.09728	2.72831
NM_014772	-0.775058	8.19517	0.407803	CTIF	7.63678	9.0787	7.90881	7.58452
NM_014774	-0.883648	5.48362	0.340109	EFCAB14	6.22498	5.37048	3.63587	5.66214
NM_014776	-0.974711	5.73536	0.266035	GIT2	5.86423	6.37561	4.31108	5.70403
NM_014786	-0.826688	6.23187	0.349931	ARHGEF17	6.1576	6.91664	5.32527	6.09439
NM_014806	-0.860384	6.71342	0.335764	RUSC2	6.934	7.21349	5.50333	6.69785
NM_014838	-1.07015	4.45675	0.266779	ZBED4	3.75124	5.51985	3.94987	3.67892
NM_014840	-0.843502	7.78628	0.410731	NUAK1	8.2217	8.06977	5.31701	8.1103
NM_014873	-0.874558	5.98933	0.332915	LPGAT1	6.15341	6.54408	4.47455	6.07856
NM_014897	-1.016	5.19034	0.231654	ZNF652	5.11559	5.97701	4.37934	4.78206
NM_014898	-1.33811	3.25631	0.258585	ZFP30	3.81624	3.73856	1.72999	2.92332
NM_014909	-1.445	5.57666	0.108179	VASH1	5.2353	6.67283	4.1267	5.08352
NM_014911	-0.824585	7.69328	0.364055	AAK1	7.73251	8.30577	6.65236	7.63102
NM_014918	-1.2696	6.53181	0.16175	CHSY1	6.54404	7.39536	5.13155	6.20063
NM_014930	-1.53212	3.40145	0.185688	ZNF510	4.17128	3.74986	1.78854	2.90291
NM_014937	-0.981858	5.9394	0.259812	INPP5F	5.69597	6.79511	5.14094	5.56156
NM_014950	-0.819657	4.75832	0.390405	ZBTB1	5.11559	5.11051	2.83157	5.00909
NM_014997	-0.784246	5.03584	0.359295	KLHDC10	4.89262	5.73411	4.27058	4.85293
NM_015002	-0.808449	4.80941	0.349518	FBXO21	5.13695	5.17479	4.02079	4.61645
NM_015021	-0.822609	7.57286	0.415017	ZNF292	8.05047	7.79157	5.28177	7.88496
NM_015024	-0.889726	6.66068	0.335921	XPO7	7.01699	7.0597	5.03812	6.77005
NM_015042	-0.867082	7.24674	0.346366	ZNF609	6.89941	8.09269	6.23128	7.12975
NM_015044	-0.816102	5.06406	0.332525	GGA2	5.14962	5.63705	4.26715	4.8688
NM_015056	-0.773918	4.74248	0.37208	RRP1B	4.65862	5.39587	4.39513	4.19762
NM_015072	-0.658699	7.71801	0.46329	TTLL5	7.79565	8.19646	6.87809	7.7073
NM_015111	-0.883661	4.95047	0.353719	N4BP3	4.19591	5.95277	3.54822	4.99469
NM_015133	-0.820209	5.3333	0.3379	MAPK8IP3	4.96129	6.16176	5.026	4.6778
NM_015136	-0.937887	6.80068	0.32129	STAB1	5.91704	7.8603	6.46313	6.01341
NM_015151	-0.836632	6.49562	0.354166	DIP2A	6.26045	7.27344	5.4393	6.43012
NM_015155	-0.887086	7.46691	0.330717	LARP4B	7.41254	8.17462	6.38069	7.36709
NM_015156	-0.652314	6.01957	0.453669	RCOR1	5.71881	6.72528	5.42553	5.8551
NM_015175	-0.693202	5.12941	0.444338	NBEAL2	4.26739	6.06557	5.01787	4.38587
NM_015196	-0.605205	6.61743	0.486668	KIAA0922	6.58503	7.13811	5.95808	6.54818
NM_015207	-0.959177	4.55306	0.288465	OTUD3	5.07632	4.82021	3.4367	4.4005
NM_015221	-1.03646	7.1113	0.259477	DNMBP	6.62034	8.09435	6.52686	6.47575
NM_015234	-1.08879	6.04875	0.249257	ADGRF5	5.20326	7.16262	5.02194	5.70698
NM_015245	-0.886824	7.01845	0.328575	ANKS1A	6.56783	7.91652	6.36153	6.64044
NM_015261	-0.664737	5.4235	0.428744	NCAPD3	5.84099	5.58122	4.57776	5.41071
NM_015270	-1.1836	4.31459	0.231258	ADCY6	3.63594	5.41729	3.6252	3.57954
NM_015278	-1.02624	8.62655	0.277878	SASH1	8.17548	9.59091	7.7423	8.25973
NM_015305	-0.704276	4.00285	0.473105	ANGEL1	4.3575	4.25703	3.32905	3.83788
NM_015315	-1.03091	6.42364	0.243544	LARP1	6.23888	7.27539	5.75652	5.87619
NM_015316	-0.763101	5.36924	0.370036	PPP1R13B	5.00841	6.16387	4.86981	4.99951
NM_015329	-0.638684	4.9678	0.45394	MAU2	4.73345	5.6279	4.52707	4.68977
NM_015332	-1.28059	7.02465	0.158161	NUDCD3	6.89441	7.96581	5.91054	6.51997
NM_015361	-0.785964	6.91696	0.381041	R3HDM1	7.09982	7.39895	5.74301	6.95366
NM_015364	-0.880057	4.27903	0.346909	LY96	4.78848	4.49719	3.51393	3.99076
NM_015373	-1.07571	3.40504	0.343208	CBY1	3.23758	4.26492	2.56748	2.94344
NM_015401	-1.1723	6.37539	0.198908	HDAC7	6.19066	7.29481	5.09335	6.08763
NM_015409	-0.670088	6.39136	0.448274	EP400	6.01721	7.1424	5.89952	6.12555
NM_015423	-0.835387	5.2695	0.388339	AASDHPPT	6.19474	4.68548	3.37436	5.49835
NM_015436	-0.807616	5.69246	0.398991	RCHY1	6.39065	5.58122	3.58171	5.98699
NM_015470	-0.655602	5.78206	0.466989	RAB11FIP5	5.10696	6.64132	5.85797	4.7652
NM_015471	-0.913255	4.60035	0.304927	NSL1	4.78848	5.15793	3.61445	4.42218
NM_015508	-0.76924	7.5189	0.461456	TIPARP	8.5968	6.23394	5.92366	7.71903
NM_015523	-0.674719	4.99552	0.454644	REXO2	5.54434	4.99181	3.60362	5.21351
NM_015543	-0.830261	5.86093	0.349135	RAB1A	5.72447	6.58408	4.62136	5.88662
NM_015544	-0.916632	4.23773	0.339328	TMEM98	4.62273	4.62541	3.10165	4.13774
NM_015550	-0.641726	7.77914	0.487193	OSBPL3	7.56216	8.4365	6.76964	7.87123
NM_015577	-1.06554	9.78414	0.268761	RAI14	9.53313	10.6845	8.45368	9.62528
NM_015622	-0.651981	4.35512	0.492493	CCZ1	4.0683	5.05238	3.5197	4.34863
NM_015627	-1.09984	4.33498	0.287111	LDLRAP1	3.40188	5.46606	4.16404	2.92332
NM_015638	-0.602643	6.84047	0.499198	TRPC4AP	6.92543	7.27442	5.82339	6.97092
NM_015658	-0.920629	3.02629	0.464021	NOC2L	2.37613	3.98794	2.79395	2.06206
NM_015660	-1.07323	1.93274	0.498235	GIMAP2	2.61407	2.04011	0.99214	1.53459
NM_015691	-0.774535	7.09736	0.388074	WWC3	6.93155	7.8045	6.22776	6.9904
NM_015711	-0.628355	5.61429	0.48593	GLTSCR1	4.78848	6.50794	5.65133	4.72507
NM_015852	-0.805037	4.5627	0.413941	ZNF117	4.96129	4.86246	2.53365	4.8476
NM_015891	-0.783036	5.50431	0.375463	CDC40	6.14921	5.45574	4.11912	5.62835
NM_015898	-0.684967	4.55065	0.465719	ZBTB7A	3.76228	5.45919	4.31441	3.99076
NM_015907	-0.750938	5.31492	0.41688	LAP3	5.78796	5.48308	3.46091	5.60011
NM_015909	-0.700542	8.8872	0.472598	NBAS	9.09121	9.29274	7.18415	9.17045
NM_016014	-1.01435	5.22934	0.240368	ABHD17B	5.59153	5.70538	3.88874	5.12816
NM_016030	-0.787381	6.33751	0.36982	TRAPPC12	6.15132	7.06196	5.72688	6.03702
NM_016032	-0.637868	4.47356	0.477484	ZDHHC9	4.4962	4.97265	3.88427	4.31812
NM_016042	-0.78853	3.48655	0.479835	EXOSC3	4.16297	3.37984	2.57858	3.38724
NM_016070	-0.894037	2.67993	0.494759	MRPS23	2.97831	3.10861	2.06606	2.23531
NM_016094	-0.938708	4.19196	0.346556	COMMD2	5.01765	3.96873	2.91277	4.13774
NM_016097	-0.967062	3.90848	0.341078	IER3IP1	4.32064	4.30377	2.72567	3.7831
NM_016121	-0.652745	6.16118	0.490137	KCTD3	6.68268	6.17649	4.47455	6.4792
NM_016131	-0.664791	6.55373	0.451681	RAB10	6.35645	7.21349	5.79153	6.49121
NM_016133	-1.00933	4.87743	0.237605	INSIG2	5.2859	5.30305	3.9711	4.54581
NM_016172	-0.94364	2.89275	0.469466	UBAC1	2.53903	3.73856	2.93886	1.17484
NM_016173	-0.975083	3.25815	0.403397	HEMK1	3.10512	4.05324	2.70556	2.65698
NM_016206	-0.932967	4.84312	0.392058	VGLL3	6.01028	3.46457	2.54501	5.07898
NM_016219	-0.915005	2.80181	0.472999	MAN1B1	2.73106	3.50514	2.45148	2.02477
NM_016238	-0.753408	4.83934	0.392381	ANAPC7	4.43543	5.64615	4.36338	4.4576
NM_016248	-0.753442	5.54119	0.384137	AKAP11	6.04233	5.67311	4.24989	5.65606
NM_016264	-0.898564	3.66771	0.403491	ZNF44	3.90856	4.17558	2.43935	3.63009
NM_016271	-0.769407	4.52838	0.388738	RNF138	4.76123	4.95323	3.71347	4.39321
NM_016272	-0.951751	4.06016	0.331982	TOB2	4.0504	4.77115	3.36797	3.63009
NM_016275	-0.637466	4.89807	0.456883	SELT	5.2432	5.11488	4.045	4.9154
NM_016395	-1.09716	4.56436	0.226352	HACD3	4.32064	5.47289	3.86173	3.96146
NM_016401	-0.637135	4.64306	0.463411	C11orf73	4.90263	4.94342	4.11149	4.44353
NM_016485	-0.635867	6.32476	0.4946	VTA1	6.93033	6.19314	4.87882	6.58867
NM_016530	-0.72747	5.86992	0.392034	RAB8B	5.90464	6.42402	5.06205	5.77313
NM_016551	-0.972637	4.75872	0.260386	TM7SF3	4.81523	5.44188	4.09612	4.27906
NM_016580	-0.86894	3.63207	0.42098	PCDH12	3.53657	4.34905	2.73563	3.44485
NM_016589	-0.745091	4.55022	0.417287	TIMMDC1	4.86728	4.88313	3.34214	4.6413
NM_016614	-0.68833	5.06386	0.45666	TDP2	5.63721	5.03862	3.35512	5.36295
NM_016626	-0.83199	5.4629	0.372849	MEX3C	6.14921	5.39587	3.53688	5.70108
NM_016640	-1.17916	2.93067	0.374171	MRPS30	3.99533	2.39703	1.17882	2.83988
NM_016642	-0.798392	5.82745	0.374457	SPTBN5	5.00841	6.80598	5.31036	5.43223
NM_016930	-0.739591	7.04436	0.410683	STX18	7.28535	7.44486	5.88729	7.1154
NM_017413	-2.85189	6.72587	0.00743625	APLN	5.80674	8.30481	4.08449	5.11491
NM_017423	-0.83871	7.48761	0.368821	GALNT7	7.61716	8.04533	6.02455	7.58852
NM_017425	-0.960302	2.77246	0.453547	SPA17	2.77533	3.46457	2.20151	2.20229
NM_017454	-0.609814	5.81378	0.474969	STAU1	5.77439	6.34241	4.91431	5.88141
NM_017455	-0.826972	7.1268	0.377982	NPTN	7.53908	7.42297	5.47835	7.2955
NM_017495	-0.819294	4.11962	0.428879	RBM38	3.03403	5.17059	3.68806	3.60504
NM_017512	-0.728258	5.1882	0.388546	ENOSF1	4.97083	5.89287	4.72493	4.82608
NM_017514	-1.05938	3.88917	0.306966	PLXNA3	3.49747	4.8362	3.47286	3.00219
NM_017519	-0.828175	9.39556	0.391337	ARID1B	9.62236	9.8693	7.76981	9.55569
NM_017575	-0.804811	7.10227	0.385866	SMG6	6.39951	8.04934	6.79247	6.47747
NM_017582	-0.995922	3.69469	0.341695	UBE2Q1	4.29806	3.87896	2.95599	3.24854
NM_017617	-0.840437	6.88979	0.362643	NOTCH1	6.89315	7.53579	5.45294	6.98069
NM_017620	-0.643544	5.16654	0.442604	ILF3	5.12417	5.71694	4.53564	5.03745
NM_017645	-0.683284	4.42492	0.458289	HAUS6	4.58592	4.85201	3.4906	4.44353
NM_017660	-1.12965	6.76374	0.229217	GATAD2A	6.00564	7.87004	6.20375	5.96747
NM_017693	-0.904951	4.0553	0.367649	BIVM	4.01392	4.76559	2.85001	4.0004
NM_017696	-0.81449	4.88756	0.370126	MCM9	5.661	4.63763	3.61984	4.94065
NM_017734	-0.781676	8.24535	0.493115	PALMD	9.29783	7.11098	5.46645	8.65251
NM_017742	-0.919175	5.73499	0.2962	ZCCHC2	6.00332	6.23394	4.22537	5.78433
NM_017750	-1.00613	3.51467	0.35661	RETSAT	3.52365	4.2411	2.79395	3.04006
NM_017758	-1.05633	3.13239	0.387853	ALKBH5	2.73106	4.07136	2.80345	2.09842
NM_017769	-0.711496	6.408	0.446592	G2E3	6.84982	6.57934	4.75705	6.67094
NM_017784	-1.0032	7.54842	0.283662	OSBPL10	6.96896	8.5475	7.01414	6.90574
NM_017798	-0.812945	4.72916	0.348863	YTHDF1	4.84149	5.27985	3.9584	4.51923
NM_017802	-0.676665	4.8088	0.45008	DNAAF5	4.3355	5.60007	4.68182	4.1113
NM_017810	-0.738369	3.56706	0.492494	ZSCAN32	3.49747	4.18394	3.08617	3.19918
NM_017811	-0.731001	6.22566	0.414	UBE2R2	6.10437	6.8824	5.2104	6.23981
NM_017813	-0.94835	5.79257	0.27888	IMPAD1	6.4969	5.80081	4.46261	5.74761
NM_017841	-0.787782	4.40002	0.414649	SDHAF2	4.59212	4.87799	2.93022	4.55237
NM_017849	-0.720964	3.87373	0.477159	TMEM127	3.98594	4.36383	2.97292	3.83788
NM_017864	-0.611594	5.59184	0.464355	INTS8	5.84619	5.88264	4.78128	5.60958
NM_017867	-1.04719	3.86299	0.318761	C4orf27	4.61666	3.87896	2.48727	3.7492
NM_017918	-0.6488	6.25461	0.457309	CCDC109B	6.43271	6.64435	5.38499	6.27001
NM_017929	-0.950272	3.16762	0.419879	PEX26	3.37337	3.72718	2.28522	2.8822
NM_017943	-0.747406	5.99988	0.397459	FBXO34	5.97513	6.60756	4.87432	6.051
NM_017946	-0.893095	3.12117	0.451001	FKBP14	3.49747	3.49175	2.22995	2.90291
NM_017969	-0.718695	6.02673	0.420434	IWS1	6.47861	6.19107	4.73984	6.16893
NM_017987	-0.693699	5.18561	0.420478	RUFY2	5.26665	5.68493	4.10383	5.26639
NM_018006	-1.00281	3.95634	0.312739	TRMU	4.00465	4.65576	3.44279	3.28054
NM_018026	-0.616894	6.36906	0.486287	PACS1	5.93667	7.11535	6.12073	5.92508
NM_018028	-0.602229	4.77121	0.499225	SAMD4B	4.30562	5.51654	4.72243	4.06612
NM_018032	-0.691538	5.46793	0.421633	LUC7L	5.17048	6.19521	4.58603	5.44993
NM_018064	-0.806264	5.23391	0.341777	AKIRIN2	5.67859	5.4763	4.18961	5.19264
NM_018092	-1.07481	4.83983	0.227737	NETO2	4.46951	5.79264	4.11531	4.28696
NM_018109	-0.747018	3.93708	0.45155	MTPAP	4.14622	4.36383	3.18393	3.7831
NM_018121	-0.844505	5.27349	0.360149	SLF2	5.94153	5.24833	3.4788	5.47088
NM_018130	-0.604109	5.39137	0.465395	SHQ1	5.38207	5.89287	4.86981	5.22177
NM_018133	-0.840148	4.68995	0.335593	MSL2	4.64078	5.36314	4.12292	4.28696
NM_018142	-0.904714	4.79588	0.301826	INTS10	5.02683	5.31451	3.77268	4.64745
NM_018169	-0.898979	6.72843	0.349381	KIAA1551	6.94977	7.25373	4.73489	6.92611
NM_018174	-0.828348	4.13395	0.395084	MAP1S	3.98594	4.85725	3.39962	3.88026
NM_018180	-0.706099	5.05574	0.422994	DHX32	5.21937	5.49991	3.73844	5.22177
NM_018182	-0.828192	5.73125	0.334133	FAM222B	5.41741	6.54083	4.99939	5.47779
NM_018196	-0.713443	5.452	0.389014	TMLHE	5.63121	5.88521	4.72493	5.3174
NM_018198	-0.659091	5.43732	0.44462	DNAJC11	4.88759	6.25392	5.12399	5.00909
NM_018202	-0.617282	6.40142	0.497506	TMEM57	6.60509	6.74659	5.06007	6.6466
NM_018206	-1.07528	4.98788	0.259813	VPS35	5.84359	4.84676	2.97292	5.05143
NM_018223	-0.678287	5.15889	0.429423	CHFR	4.77219	5.91813	4.66368	4.8845
NM_018224	-0.667051	5.84228	0.431672	COA1	5.63121	6.5096	5.28347	5.63455
NM_018252	-0.682703	4.64499	0.452509	TMEM206	4.17954	5.4349	4.54699	3.89066
NM_018263	-0.655639	6.69772	0.466616	ASXL2	6.84723	7.11754	5.4931	6.86147
NM_018279	-1.05953	2.22303	0.472728	TMEM19	3.08767	1.96454	1.70994	1.42435
NM_018326	-1.27429	3.70264	0.252559	GIMAP4	4.57344	3.7157	1.80754	3.56663
NM_018328	-0.703096	9.02234	0.467725	MBD5	9.29807	9.36433	7.39943	9.28258
NM_018339	-1.04649	2.22358	0.483954	RFK	2.66201	2.63499	1.02498	2.02477
NM_018356	-0.82189	4.47428	0.39063	C5orf22	5.13695	4.43556	3.02255	4.59116
NM_018361	-1.12712	6.00168	0.218671	AGPAT5	6.31395	6.59038	4.22537	5.95265
NM_018364	-0.736776	4.95342	0.390203	RSBN1	5.37849	5.16216	3.99201	4.93563
NM_018371	-0.884001	5.94721	0.446756	CSGALNACT1	3.59947	7.20428	6.21625	3.59235
NM_018413	-1.27858	8.13893	0.217305	CHST11	6.87292	9.41156	7.76708	6.79657
NM_018433	-0.774655	6.37386	0.414676	KDM3A	6.97253	6.39013	4.59426	6.62027
NM_018475	-0.847449	6.60663	0.359768	TMEM165	6.84853	7.0811	5.00763	6.74447
NM_018622	-0.888051	5.12751	0.2942	PARL	5.158	5.78168	4.26371	4.90003
NM_018659	-1.84757	2.93456	0.159916	CYTL1	2.40459	4.225	1.39523	2.02477
NM_018676	-1.00028	5.35759	0.23917	THSD1	5.9391	5.58438	4.2076	5.17997
NM_018710	-0.985942	4.52739	0.304838	TMEM55A	5.4209	4.20871	3.09393	4.49216
NM_018714	-0.856223	4.4614	0.350648	COG1	4.70512	4.93849	3.34864	4.40777
NM_018715	-0.644494	6.07448	0.47112	RCC2	5.87952	6.72098	5.12777	6.13433
NM_018717	-1.09164	10.1231	0.265419	MAML3	10.2215	10.8473	8.3345	10.1059
NM_018719	-0.97369	5.03824	0.241913	CDCA7L	5.37129	5.50991	4.43843	4.49898
NM_018941	-0.712809	4.43193	0.44955	CLN8	4.59212	4.88313	3.20557	4.55891
NM_018959	-1.01798	5.76275	0.244557	DAZAP1	5.26277	6.73952	5.23692	5.08805
NM_018969	-0.964494	4.90092	0.294287	GPR173	4.17954	5.92313	4.59972	4.00997
NM_018988	-1.10889	7.38169	0.230689	GFOD1	7.53506	8.07876	5.88058	7.25279
NM_018994	-0.706142	5.39271	0.410245	FBXO42	4.94684	6.19314	4.98486	5.0043
NM_019020	-0.856113	5.99082	0.363343	TBC1D16	4.96607	7.0483	5.78316	5.14129
NM_019030	-0.653546	5.3416	0.442659	DHX29	5.83838	5.38866	4.38251	5.39983
NM_019095	-0.908272	5.36876	0.293986	CRLS1	5.57597	5.9106	4.045	5.3592
NM_019116	-0.766097	4.00459	0.438014	UBFD1	4.37917	4.28836	3.17664	3.88026
NM_019589	-0.756834	6.16252	0.401237	YLPM1	6.41708	6.56342	4.86981	6.27399
NM_019592	-0.976132	3.83534	0.357396	RNF20	4.58592	3.79419	2.38978	3.81622
NM_019594	-0.648792	5.47522	0.446261	LRRC8A	5.05852	6.23193	5.00969	5.20936
NM_019605	-1.25218	2.26784	0.418899	SERTAD4	3.23758	2.07646	0.101893	2.23531
NM_020133	-0.636105	6.86075	0.475133	AGPAT4	6.77686	7.43615	5.93775	6.91596
NM_020135	-0.8199	6.52586	0.379949	WRNIP1	7.20874	6.45023	4.96384	6.67546
NM_020151	-1.21974	4.58233	0.169091	STARD7	5.12844	5.00129	3.55386	4.0934
NM_020154	-0.857647	2.95663	0.488652	EMC7	3.44362	3.17716	2.06606	2.77398
NM_020251	-1.01763	6.8892	0.283119	ARRB1	6.00099	7.98446	6.20375	6.37562
NM_020319	-0.622011	4.94547	0.489328	ANKMY2	5.51853	4.85201	3.66741	5.16719
NM_020338	-0.650491	7.66202	0.483032	ZMIZ1	7.04325	8.5027	7.51591	7.04497
NM_020375	-0.678488	5.27292	0.411573	TIGAR	5.37489	5.74262	4.73737	5.03276
NM_020382	-1.32367	4.67944	0.134577	SETD8	4.78848	5.50991	3.7185	4.00997
NM_020414	-0.659798	4.76203	0.444666	DDX24	5.1992	4.88825	4.07668	4.65357
NM_020452	-0.608168	4.65149	0.493229	ATP8B2	4.5028	5.24434	4.06488	4.52592
NM_020464	-0.828624	8.00909	0.371811	NHSL1	8.13252	8.56479	6.74582	8.04428
NM_020524	-0.934104	3.26769	0.432398	PBXIP1	2.77533	4.18394	3.04674	2.2676
NM_020531	-0.659841	4.68103	0.447443	APMAP	4.62273	5.24833	4.30106	4.31812
NM_020662	-1.13471	3.78214	0.267723	MRS2	4.31315	4.15873	2.88621	3.29627
NM_020698	-1.30414	6.25011	0.14712	TMCC3	6.08252	7.21858	5.19064	5.68024
NM_020699	-0.762899	6.35076	0.39615	GATAD2B	6.06925	7.11098	5.39602	6.30348
NM_020710	-0.838895	3.923	0.404536	LRRC47	3.78411	4.63763	3.68293	3.13062
NM_020728	-0.776752	6.75289	0.384775	ESYT2	6.89816	7.25868	5.59504	6.79103
NM_020762	-0.615902	7.60776	0.494033	SRGAP1	7.44373	8.219	6.91415	7.55049
NM_020772	-0.852078	5.39555	0.337235	NUFIP2	5.51201	5.97219	3.90206	5.49835
NM_020787	-0.723856	3.78851	0.488661	ZNF624	4.30562	3.86863	2.78439	3.80526
NM_020798	-0.602348	4.70013	0.49188	USP35	4.44916	5.34463	4.39198	4.33346
NM_020808	-0.630452	6.29572	0.477028	SIPA1L2	5.85652	7.05287	5.96444	5.92508
NM_020814	-0.814515	6.5848	0.364089	2004-03-01	6.17629	7.42826	6.31582	5.89181
NM_020823	-0.759782	6.67629	0.389412	TMEM181	6.41008	7.4265	6.11788	6.36446
NM_020825	-0.769986	5.57016	0.371692	CRAMP1	5.07189	6.42579	5.19605	5.06527
NM_020831	-0.606387	6.89153	0.498194	MKL1	6.45669	7.63434	6.32656	6.75448
NM_020848	-1.23099	6.37811	0.18443	KIAA1462	6.93643	6.79375	4.54417	6.25197
NM_020856	-0.7697	4.57378	0.383193	TSHZ3	4.59212	5.15793	4.27741	3.97129
NM_020870	-0.632167	8.14131	0.48776	SH3RF1	8.38281	8.46206	7.17229	8.22264
NM_020894	-0.782953	3.75245	0.474846	UVSSA	2.79696	4.7488	3.55386	2.98287
NM_020899	-0.943229	3.62853	0.391148	ZBTB4	3.13939	4.5563	3.25486	2.8612
NM_020901	-0.797198	5.14322	0.356655	PHRF1	4.86728	5.91813	4.32763	4.98015
NM_020918	-1.1097	3.40397	0.342481	GPAM	4.41459	2.92144	2.25785	3.11295
NM_020919	-0.636986	6.64556	0.487192	ALS2	7.04664	6.80192	5.25261	6.89157
NM_020923	-0.895282	4.71898	0.319324	ZDBF2	4.96607	5.22018	3.41828	4.7134
NM_020928	-0.818958	10.006	0.402132	ZSWIM6	10.1299	10.5552	8.32134	10.1902
NM_020936	-0.751135	4.24403	0.426045	DDX55	4.22812	4.84149	3.65697	3.96146
NM_020944	-0.977707	5.43814	0.277456	GBA2	4.63479	6.49288	4.81687	4.9154
NM_021033	-0.903099	5.81787	0.341168	RAP2A	6.69713	5.43839	3.9795	5.97726
NM_021194	-1.28706	2.52191	0.368424	SLC30A1	3.59947	2.07646	0.777659	2.33008
NM_021214	-0.980642	4.28986	0.334287	ABHD17C	3.76228	5.24833	4.29771	2.68115
NM_021215	-0.671451	5.78035	0.422786	RPRD1B	6.0378	6.11447	4.93821	5.75901
NM_021224	-0.639019	7.37922	0.498628	ZNF462	7.77536	7.54311	5.81637	7.67381
NM_021227	-0.633319	5.41166	0.455144	OSTC	5.51201	5.85414	4.48048	5.47434
NM_021243	-0.698051	3.86512	0.492107	ABRACL	4.14622	4.19224	3.00619	3.82709
NM_021574	-0.960269	7.35532	0.294033	BCR	6.97964	8.25908	6.57616	6.98798
NM_021629	-1.16722	6.9446	0.224063	GNB4	7.39314	7.4344	4.85162	6.9437
NM_021639	-0.787506	6.5383	0.379189	GPBP1L1	6.66661	7.06423	5.34491	6.58227
NM_021821	-0.764328	4.5574	0.38365	MRPS35	4.79387	4.97265	3.99615	4.23891
NM_021943	-0.886301	9.24975	0.355477	ZFAND3	9.27634	9.90716	7.74938	9.32155
NM_021999	-1.06255	5.48473	0.252835	ITM2B	6.32329	5.36314	3.57064	5.53196
NM_022039	-0.774643	6.19563	0.374845	FBXW4	6.29507	6.73384	5.36909	6.06254
NM_022041	-0.607825	5.42609	0.46782	GAN	5.40338	5.94049	4.74724	5.36668
NM_022048	-0.779035	6.59403	0.380728	CSNK1G1	6.37635	7.33099	5.77835	6.4496
NM_022066	-0.689449	5.06091	0.424382	UBE2O	4.70512	5.80894	4.9274	4.35615
NM_022145	-0.628403	5.36069	0.466542	CENPK	5.74965	5.52314	4.2076	5.52864
NM_022454	-1.32229	3.65673	0.306132	SOX17	4.72218	3.30522	-0.0957471	3.77189
NM_022458	-0.857774	7.91692	0.366816	LMBR1	8.03576	8.49433	6.32409	8.04311
NM_022574	-1.13018	2.78312	0.382561	GIGYF1	2.66201	3.63268	2.20151	1.98649
NM_022726	-0.886309	2.90645	0.471249	ELOVL4	3.3589	3.16033	2.63285	2.06206
NM_022731	-0.750838	6.16563	0.418347	NUCKS1	6.58968	6.39013	4.58052	6.37932
NM_022733	-0.732289	3.62158	0.499104	SMAP2	3.34428	4.3416	3.53117	2.75133
NM_022750	-0.760004	5.87575	0.37151	PARP12	5.84359	6.49456	5.11449	5.71578
NM_022754	-0.815125	4.91518	0.338807	SFXN1	5.10262	5.41018	4.07668	4.74814
NM_022766	-0.978929	6.16843	0.290494	CERK	5.45191	7.19914	5.68512	5.50174
NM_022769	-0.612897	5.41911	0.462014	CRTC3	5.25106	6.02662	5.11639	5.03745
NM_022780	-1.08773	5.03281	0.200239	RMND5A	5.44165	5.50991	3.95414	4.72507
NM_022786	-0.988431	3.07771	0.410424	ARV1	3.34428	3.60806	2.28522	2.68115
NM_022831	-0.829553	5.21063	0.374275	AIDA	5.87698	5.17479	3.32246	5.44288
NM_022841	-0.806444	7.64018	0.396769	RFX7	8.00937	7.96641	5.97499	7.82994
NM_022894	-0.615989	4.73262	0.479499	PAPOLG	5.14962	4.84676	3.92834	4.74241
NM_022908	-0.910325	5.39802	0.295168	NT5DC2	5.46211	6.04508	4.13048	5.36295
NM_023085	-0.770757	4.07635	0.428216	CAPN10	4.08598	4.66772	3.51393	3.7492
NM_023110	-0.939315	5.11633	0.286684	FGFR1	4.64675	6.04279	4.82389	4.25511
NM_023924	-0.63846	5.42195	0.454146	BRD9	5.22337	6.06557	4.64796	5.39253
NM_023925	-0.98425	5.62495	0.287186	CAPRIN2	6.27978	5.74262	3.65697	5.75046
NM_024015	-1.854	1.33491	0.296828	HOXB4	1.64283	2.24563	-0.324826	0.490742
NM_024057	-0.783695	4.57924	0.411295	NUP37	5.33479	4.33411	3.10165	4.73665
NM_024071	-1.52661	3.27961	0.210966	ZFYVE21	2.63824	4.49047	2.63285	1.90673
NM_024091	-1.10007	2.89126	0.388411	FASTKD3	3.80561	2.63499	1.74978	2.60739
NM_024092	-1.25731	2.66853	0.34156	TMEM109	3.40188	2.8602	1.76929	2.02477
NM_024093	-0.979551	2.95085	0.441684	C2orf49	3.80561	2.70632	1.66897	2.8612
NM_024095	-1.07005	2.40583	0.45447	ASB8	2.81827	2.8602	1.23604	2.16849
NM_024097	-1.00865	2.55841	0.455836	C1orf50	3.05213	2.88091	1.58337	2.2676
NM_024293	-1.18429	2.53726	0.396941	FAM134A	3.13939	2.88091	0.777659	2.44747
NM_024315	-0.877427	5.73622	0.31113	TMEM243	6.2369	5.96978	4.41385	5.75332
NM_024419	-0.976768	5.60547	0.269448	PGS1	4.96129	6.61221	5.12209	4.94065
NM_024546	-0.857119	5.53902	0.343908	RNF219	6.28936	5.38141	3.92834	5.67424
NM_024561	-0.817194	5.87531	0.35476	NAA16	6.26045	6.19314	4.4952	5.96747
NM_024613	-0.988059	3.82657	0.356426	PLEKHF2	4.69364	3.57032	2.41477	3.7831
NM_024641	-1.03525	3.61567	0.354841	MANEA	4.44231	3.49175	2.14287	3.55359
NM_024650	-0.649421	6.66689	0.471402	C11orf80	6.5788	7.25373	5.55905	6.79657
NM_024667	-0.684481	5.23701	0.424333	VPS37B	5.30112	5.74262	4.18235	5.31354
NM_024684	-0.860695	4.8072	0.318767	AAMDC	4.92245	5.38504	4.10767	4.49216
NM_024713	-0.64556	5.98317	0.452377	KATNBL1	6.03097	6.47427	5.13155	5.99183
NM_024715	-0.705519	4.16269	0.459973	TXNDC15	4.11211	4.75442	3.53688	3.96146
NM_024756	-0.685934	5.42685	0.43115	MMRN2	5.46211	5.95521	4.19323	5.57775
NM_024757	-0.794133	6.99983	0.406861	EHMT1	6.00332	8.02397	6.83765	6.18381
NM_024776	-0.755559	9.3306	0.442927	PEAK1	9.29285	9.95172	7.60141	9.57739
NM_024817	-0.813843	8.40285	0.406119	THSD4	7.50498	9.41156	8.29023	7.47299
NM_024830	-0.812641	5.36368	0.376152	LPCAT1	4.46951	6.36647	5.26812	4.39321
NM_024869	-1.58426	1.71106	0.3426	FAM110D	2.56448	1.92521	0.614622	0.786479
NM_024896	-0.697247	4.65857	0.424433	ERMP1	4.90263	5.02008	4.03698	4.46458
NM_024945	-0.833813	3.47179	0.462259	RMI1	4.04137	3.58301	2.09728	3.55359
NM_024954	-1.45531	6.00708	0.12772	UBTD1	5.2073	7.24278	5.42553	4.6838
NM_024997	-1.0039	5.17906	0.250332	ATF7IP2	4.75018	6.12318	4.42926	4.73665
NM_025076	-0.648217	5.51857	0.43899	UXS1	5.25888	6.19933	5.08364	5.22588
NM_025081	-0.779113	3.69135	0.45413	NYNRIN	4.11211	3.92952	2.99795	3.4589
NM_025106	-2.04743	7.10904	0.0518345	SPSB1	5.7301	8.61354	5.68768	5.80922
NM_025154	-0.765195	5.38329	0.3647	SUN1	5.3049	6.03357	4.57221	5.25032
NM_025161	-0.710884	3.68242	0.496708	FAAP100	3.69474	4.23307	3.03872	3.48659
NM_025176	-0.71194	6.80536	0.427579	NINL	6.44304	7.57523	6.06261	6.68296
NM_025179	-0.937388	9.70406	0.32492	PLXNA2	9.22689	10.6372	8.84868	9.41684
NM_025204	-1.33621	2.4428	0.361625	TRABD	1.59424	3.62043	2.11264	0.786479
NM_025219	-1.49516	5.15021	0.113546	DNAJC5	4.19591	6.43456	4.26027	4.17226
NM_025250	-0.91635	6.03817	0.322342	TTYH3	5.28972	7.05173	5.13343	5.80648
NM_030571	-0.600306	5.60303	0.497225	NDFIP1	5.97038	5.76785	4.19683	5.88402
NM_030579	-0.644844	5.35004	0.454823	CYB5B	5.47893	5.77892	4.18598	5.50851
NM_030649	-0.984621	2.92177	0.439575	ACAP3	2.19245	3.93942	2.55629	2.06206
NM_030665	-1.02335	6.81508	0.299571	RAI1	5.66395	7.97125	6.58857	5.70403
NM_030755	-0.984723	4.15359	0.334353	TMX1	4.85702	4.2005	2.47543	4.20597
NM_030756	-0.922173	7.74201	0.315782	TCF7L2	7.41866	8.60501	6.92669	7.44415
NM_030796	-1.48449	7.35301	0.109645	VOPP1	7.29868	8.34168	5.91274	6.8076
NM_030797	-0.737787	7.51542	0.440993	FAM49A	7.69627	7.96702	5.80814	7.77133
NM_030803	-0.918337	5.17873	0.26981	ATG16L1	5.33848	5.75949	4.5242	4.75953
NM_030805	-0.793079	3.97227	0.421835	LMAN2L	3.96698	4.58813	3.30919	3.70273
NM_030809	-0.764814	4.72235	0.38396	CSRNP2	4.71652	5.32588	3.88874	4.60386
NM_030819	-0.753602	5.09134	0.391031	GFOD2	4.5159	5.96736	4.59972	4.72507
NM_030821	-0.992112	3.48919	0.368702	PLA2G12A	3.91846	3.87896	2.52219	3.21582
NM_030912	-0.916163	5.39185	0.310041	TRIM8	4.70512	6.38651	4.43538	5.19264
NM_030918	-0.679304	4.86915	0.428046	SNX27	5.00841	5.3107	4.09612	4.79873
NM_030919	-1.06717	3.81701	0.304682	FAM83D	3.77324	4.61309	2.72567	3.54044
NM_030937	-0.879267	4.60017	0.326852	CCNL2	4.73905	5.17479	3.53688	4.49898
NM_030940	-1.11377	3.67535	0.294983	ISCA1	4.42852	3.73856	2.75533	3.23227
NM_030971	-0.845468	3.82666	0.41996	SFXN3	4.3355	4.02562	2.52219	3.86978
NM_030973	-0.815557	3.66434	0.455134	MED25	3.05213	4.57548	3.2958	3.07697
NM_031283	-1.01667	6.5608	0.317001	TCF7L1	5.11559	7.76676	6.39254	5.34792
NM_031296	-0.712541	4.36627	0.463401	RAB33B	4.76123	4.59441	2.90397	4.57835
NM_031301	-0.623126	5.0327	0.488416	APH1B	5.57909	4.98226	3.68293	5.27832
NM_031443	-0.81055	5.68168	0.340714	CCM2	5.61607	6.35171	4.75705	5.57129
NM_031454	-0.635482	4.99052	0.458516	SELO	4.69939	5.67903	4.48048	4.77646
NM_031459	-0.675367	4.04775	0.492913	SESN2	3.72891	4.76559	3.75321	3.56663
NM_031885	-0.786698	4.42572	0.408617	BBS2	5.04954	4.41441	3.08617	4.53258
NM_031902	-0.638937	4.74632	0.458234	MRPS5	4.98032	5.07501	4.03295	4.6778
NM_031918	-1.23309	2.43159	0.382199	KLF16	2.34709	3.28982	2.12783	0.954559
NM_032116	-0.849661	6.87491	0.36209	KATNAL1	7.19862	7.27735	5.22284	7.02622
NM_032122	-0.62772	6.37439	0.48342	DTNBP1	6.71428	6.59195	5.20504	6.54818
NM_032141	-0.694369	6.46957	0.44898	NSRP1	6.56783	6.95742	5.06205	6.67395
NM_032171	-0.667626	4.09044	0.498313	CEP78	4.58592	4.15023	3.09393	4.1551
NM_032181	-1.76253	7.24927	0.071063	EVA1A	6.76456	8.49768	5.53075	6.52999
NM_032189	-0.63205	6.83258	0.47717	ATP11A	6.42925	7.57523	6.56155	6.39584
NM_032233	-1.05833	6.68269	0.235284	SETD3	6.74938	7.40968	5.52932	6.44608
NM_032259	-1.17198	2.39388	0.423288	WDR24	1.49184	3.53157	1.84481	1.48052
NM_032268	-1.05766	5.96255	0.240846	ZNRF1	5.3495	6.99588	5.26641	5.40709
NM_032310	-1.41705	3.02055	0.245806	C9orf89	3.3589	3.72718	2.24397	2.02477
NM_032341	-0.832362	5.07548	0.332314	DDI2	5.31243	5.54276	3.9753	5.03745
NM_032374	-0.869694	4.26285	0.358825	APOPT1	4.09474	5.02008	3.53117	3.96146
NM_032389	-0.648597	4.84432	0.458529	ARFGAP2	4.94684	5.29536	3.87979	4.9103
NM_032408	-0.600984	5.71018	0.479565	BAZ1B	5.55072	6.30843	4.92305	5.72453
NM_032420	-0.781352	4.95345	0.384506	PCDH1	4.27512	5.88008	4.25682	4.72507
NM_032458	-0.722283	4.93777	0.405902	PHF6	5.2353	5.27204	3.85261	4.99469
NM_032476	-0.803139	4.44102	0.377001	MRPS6	4.43543	5.066	3.70843	4.21428
NM_032515	-0.867588	4.54011	0.345577	BOK	4.11211	5.41729	3.8014	4.24703
NM_032520	-0.813408	3.34111	0.487232	GNPTG	2.88039	4.18394	3.21272	2.38997
NM_032558	-0.624787	6.00021	0.472585	HIATL1	6.12804	6.41518	5.0199	6.09439
NM_032601	-1.12379	3.46076	0.312745	MCEE	3.48419	4.2411	2.64347	2.92332
NM_032718	-0.831711	3.36318	0.478963	MFSD9	3.99533	3.37984	2.06606	3.41633
NM_032773	-0.660444	6.57365	0.468082	LRCH3	6.69136	7.02291	5.25087	6.77708
NM_032783	-0.684991	5.5072	0.448055	CBR4	6.00796	5.58122	3.89763	5.78154
NM_032788	-1.20138	3.75718	0.263637	ZNF514	4.16297	4.31142	2.11264	3.60504
NM_032801	-0.936327	7.48326	0.352685	JAM3	8.06782	7.65777	5.14841	7.71683
NM_032826	-0.718058	3.7236	0.49813	SLC35B4	4.17128	3.88922	2.64347	3.7831
NM_032852	-0.721162	4.98702	0.397339	ATG4C	5.33108	5.27204	4.09612	4.94565
NM_032853	-1.10426	4.29573	0.261499	MUM1	3.67151	5.34835	3.73844	3.52716
NM_032859	-0.689479	4.95829	0.465706	ABHD13	5.72164	4.58813	3.33561	5.23408
NM_032860	-0.700777	4.33173	0.454317	LTV1	4.76123	4.50388	3.41209	4.32581
NM_032866	-0.652335	7.02659	0.46006	CGNL1	6.80382	7.69258	6.49645	6.81307
NM_032875	-0.650912	5.67633	0.438096	FBXL20	5.56655	6.27558	5.00558	5.56806
NM_032905	-1.03716	5.00908	0.235666	RBM17	5.37489	5.49656	3.6252	4.90517
NM_032983	-0.698032	4.85195	0.44637	CASP2	5.46211	4.77668	3.47286	5.04678
NM_033081	-0.783442	6.75269	0.387933	DIDO1	6.59895	7.4587	5.5964	6.78407
NM_033102	-1.1491	4.23027	0.239111	SLC45A3	3.98594	5.15793	3.84343	3.14806
NM_033111	-0.65676	7.08276	0.484828	N4BP2L2	7.31001	7.43615	5.48427	7.37359
NM_033117	-1.03577	4.33569	0.263062	RBM18	4.74462	4.77668	3.46091	3.95155
NM_033222	-0.642584	5.8217	0.470689	PSIP1	6.29697	5.89032	4.42003	6.06714
NM_033228	-0.660769	5.07377	0.472069	TRIM23	5.77712	4.79316	3.58722	5.33275
NM_033238	-0.625121	5.1326	0.459686	PML	4.97558	5.74262	4.52707	5.0043
NM_033274	-1.04883	5.99678	0.242393	ADAM19	5.49557	6.98875	5.25261	5.49494
NM_033360	-0.645037	5.43871	0.487059	KRAS	6.04006	5.32588	3.65697	5.78712
NM_033387	-1.41319	3.00906	0.25747	FAM78A	3.01569	3.91955	2.51064	1.58671
NM_033395	-0.672049	5.81863	0.456899	CEP295	6.46009	5.66418	4.37616	6.05331
NM_033426	-0.870409	3.24513	0.456571	CIPC	4.00465	3.03663	2.96448	2.44747
NM_033481	-1.03506	4.89315	0.247483	FBXO9	5.6432	4.90351	3.53117	4.78206
NM_033515	-1.04255	9.5791	0.337699	ARHGAP18	10.0631	9.95142	6.51463	9.82765
NM_033517	-0.947915	8.13316	0.305018	SHANK3	7.85808	8.98739	7.30774	7.81363
NM_033631	-0.846347	6.84767	0.353177	LUZP1	6.59123	7.64118	5.74301	6.79657
NM_052817	-1.03603	5.29772	0.223723	MID2	5.06745	6.1723	4.66107	4.7134
NM_052875	-1.42062	4.81564	0.108795	VPS26B	5.05404	5.60941	3.53688	4.25511
NM_052876	-0.96234	4.2107	0.341932	NACC1	3.52365	5.21611	4.045	3.07697
NM_052905	-1.03151	8.98774	0.27243	FMNL2	8.90236	9.78977	7.78127	8.80466
NM_052911	-0.665731	5.3336	0.441721	ESCO1	5.3495	5.86197	4.18598	5.46741
NM_052927	-0.930458	4.82439	0.296711	PWWP2A	4.47623	5.69957	4.14922	4.40777
NM_052932	-0.663234	6.90751	0.473318	TMEM123	7.44116	6.91413	5.50479	7.13523
NM_052940	-0.68797	3.80616	0.499447	LRRC42	4.25181	3.93942	3.16931	3.63009
NM_053024	-1.00551	4.81039	0.261476	PFN2	5.54434	4.82021	3.59818	4.65967
NM_053043	-0.715125	7.70285	0.444641	RBM33	8.0833	7.94691	6.26861	7.89791
NM_053056	-0.881717	6.07154	0.323198	CCND1	5.8591	6.86172	5.12399	5.90213
NM_058230	-0.801405	4.08376	0.412223	ZNF354B	4.4962	4.35646	3.09393	4.01949
NM_080491	-0.789059	8.00916	0.402648	GAB2	8.04653	8.60151	6.60564	8.13184
NM_080592	-1.10876	2.52772	0.421688	ATRAID	3.31459	2.53404	1.20772	2.33008
NM_080660	-0.889472	3.96669	0.376609	ZC3HAV1L	4.21211	4.46328	2.87724	3.86978
NM_080677	-0.864621	3.16062	0.467546	DYNLL2	3.78411	3.21026	2.15776	3.04006
NM_080821	-1.27552	2.25111	0.385218	FAM210B	2.66201	2.79625	1.6896	1.17484
NM_080836	-0.676346	5.03532	0.416586	STK35	5.1327	5.50659	4.47751	4.8152
NM_130445	-1.15775	7.02585	0.22777	COL18A1	6.10654	8.18454	6.37592	6.28979
NM_130464	-1.31692	5.01375	0.146605	NPIPB3	4.82052	6.00085	3.47286	4.70163
NM_130783	-0.975297	6.80521	0.278511	TSPAN18	6.49028	7.69039	5.99895	6.44078
NM_130850	-1.05835	5.09103	0.2249	BMP4	5.75242	5.25628	3.77751	4.93563
NM_133367	-1.09112	4.78928	0.217963	PAQR8	4.59829	5.67014	4.21117	4.06612
NM_134261	-0.729427	8.46286	0.423285	RORA	8.26794	9.15982	7.93659	8.15952
NM_138288	-0.788737	4.55873	0.379824	SPTSSA	4.77764	5.01072	3.57064	4.50576
NM_138330	-0.728964	3.79781	0.48969	ZNF675	4.26739	3.94926	2.52219	3.93154
NM_138348	-0.634845	5.37391	0.473991	OTULIN	5.76619	5.53951	3.93699	5.63765
NM_138353	-0.819195	3.02447	0.496244	DCAF15	2.95925	3.6807	2.51064	2.58193
NM_138367	-0.957503	4.3385	0.301284	ZNF251	4.34287	5.04322	3.80613	3.7492
NM_138376	-1.07325	2.27756	0.462804	TTC5	2.95925	2.368	1.74978	1.48052
NM_138383	-0.953451	3.57392	0.383403	MTSS1L	3.26888	4.42854	3.28906	2.65698
NM_138384	-0.890594	5.04188	0.312321	MTG1	5.01304	5.73695	3.7581	5.03276
NM_138400	-0.959587	4.34469	0.301681	NOM1	4.40758	5.0154	3.64646	3.91125
NM_138410	-1.05694	6.0453	0.236195	CMTM7	5.89214	6.89518	4.92522	5.79268
NM_138420	-1.06219	4.26873	0.269127	AHNAK2	3.99533	5.17059	3.80613	3.44485
NM_138443	-0.860692	3.87971	0.401747	HAUS1	4.17954	4.31142	2.64347	3.88026
NM_138446	-0.739859	3.98421	0.467187	MALSU1	4.53534	4.03488	2.83157	4.05692
NM_138459	-0.628672	5.42298	0.475726	NUS1	5.86679	5.51985	4.07668	5.66214
NM_138465	-1.01898	2.16494	0.494467	GLI4	2.19245	2.8602	1.56115	1.53459
NM_138492	-0.60328	5.39134	0.481742	PRELID2	5.61607	5.70538	4.30775	5.55176
NM_138496	-1.21093	3.95814	0.236376	CYHR1	3.62389	4.95323	3.26863	3.18234
NM_138565	-0.788479	6.63403	0.375219	CTTN	6.46178	7.35246	5.7614	6.51494
NM_138578	-0.700645	6.67255	0.447903	BCL2L1	6.21095	7.48006	5.58681	6.74734
NM_138638	-1.42261	1.8066	0.382306	CFL2	2.6854	1.88479	0.525629	1.24138
NM_138714	-0.827747	7.81662	0.379305	NFAT5	7.73251	8.50853	6.43592	7.89791
NM_138769	-1.22354	1.6135	0.467501	RHOT2	1.13218	2.61041	1.23604	0.253432
NM_138775	-0.645124	5.22559	0.455169	ALKBH8	5.81206	5.13225	4.19683	5.3251
NM_138959	-1.16749	5.57776	0.166039	VANGL1	6.11948	5.96978	4.38251	5.25032
NM_138961	-0.68639	4.18311	0.483102	ESAM	4.57969	4.38573	2.95599	4.33346
NM_138962	-0.656247	7.86632	0.474915	MSI2	7.39492	8.65282	7.68598	7.28765
NM_139015	-0.700335	6.37029	0.42961	SPPL3	6.2817	6.98875	5.4393	6.37005
NM_139169	-0.98398	5.15334	0.268963	TRUB1	5.83054	5.23633	3.64646	5.14564
NM_139178	-0.624258	5.17978	0.491399	ALKBH3	5.8871	4.84676	3.84803	5.41792
NM_139215	-0.77137	6.17467	0.40491	TAF15	6.36372	6.64284	4.60787	6.36633
NM_144570	-0.73866	4.05924	0.458359	HN1L	3.77324	4.80404	3.2958	3.92143
NM_144572	-0.747889	6.04067	0.387732	TBC1D2B	5.94638	6.69052	5.32032	5.86568
NM_144653	-1.18659	5.37056	0.236148	NACC2	3.94777	6.63372	5.14655	3.90099
NM_144703	-0.942416	3.56177	0.377962	LSM14B	3.74012	4.13307	3.01439	3.00219
NM_144716	-0.618899	5.60991	0.462579	CCDC12	5.28972	6.30268	5.44234	5.06067
NM_144732	-0.665671	5.91642	0.431822	HNRNPUL1	5.91457	6.45542	5.24217	5.79545
NM_144976	-0.977991	3.17882	0.406047	ZNF564	2.97831	3.99745	2.66446	2.52964
NM_144999	-1.36304	1.99382	0.395322	LRRC45	1.49184	3.07307	1.56115	0.490742
NM_145037	-0.607677	4.59307	0.495938	NXPE3	5.19105	4.43556	3.92399	4.52592
NM_145206	-0.728554	8.34561	0.437472	VTI1A	8.4813	8.82695	7.04749	8.48197
NM_145246	-0.798493	5.16406	0.394815	FRA10AC1	5.77712	5.18315	3.24095	5.42867
NM_145251	-0.665618	4.82122	0.459888	STYX	5.32365	4.87283	3.6622	4.96054
NM_145254	-0.708501	4.05213	0.480791	TMEM170A	3.74012	4.79316	3.24792	3.97129
NM_145686	-0.751824	9.6238	0.436159	MAP4K4	9.63386	10.2114	8.12848	9.80754
NM_145701	-0.824403	3.31326	0.475912	CDCA4	3.10512	4.06233	2.55629	3.07697
NM_147163	-0.780235	4.19112	0.409815	PSMG2	4.52241	4.53033	3.39962	4.02893
NM_147188	-0.84837	5.41	0.318956	FBXO22	5.57597	5.94541	4.3342	5.34414
NM_148921	-0.884262	6.08636	0.341725	EPN2	5.30867	7.09224	5.76383	5.3592
NM_148970	-1.16959	3.07458	0.353968	TNFRSF25	2.12564	4.23307	2.51064	2.20229
NM_148977	-0.660578	4.31136	0.472837	PANK1	4.54815	4.64974	3.7581	4.10238
NM_152240	-0.924226	6.55908	0.314502	ZMAT3	6.64887	7.19708	5.04814	6.60298
NM_152287	-1.05142	4.19394	0.277937	ZNF276	4.11211	5.00129	3.31584	3.79422
NM_152288	-1.82944	2.89458	0.153979	ORAI3	3.45727	3.62043	1.20772	2.09842
NM_152342	-1.12506	8.21726	0.241656	CDYL2	8.26503	8.99067	6.54254	8.13512
NM_152384	-0.98783	2.94149	0.424172	BBS5	3.52365	3.14329	2.06606	2.60739
NM_152406	-0.756738	6.86095	0.417262	AFAP1L1	6.79175	7.50278	5.35947	7.04381
NM_152411	-1.22888	2.62113	0.361288	ZNF786	2.77533	3.35045	2.12783	1.53459
NM_152416	-0.905783	4.15595	0.341737	NDUFAF6	4.57969	4.49047	3.40587	3.82709
NM_152420	-0.94553	4.10066	0.324043	CARNMT1	4.43543	4.54986	3.39335	3.69087
NM_152421	-1.0395	6.01449	0.242688	FAM69B	6.08032	6.73242	4.69972	5.87619
NM_152433	-1.12964	2.48372	0.410079	KBTBD3	3.22167	2.55995	1.6896	1.90673
NM_152490	-0.751677	5.20605	0.365333	B3GALNT2	5.37489	5.67311	4.54982	4.98015
NM_152493	-0.778145	5.005	0.355432	ZNF362	5.01304	5.60319	4.7546	4.33346
NM_152531	-0.770736	7.85729	0.412122	XXYLT1	7.1374	8.7939	7.43728	7.40387
NM_152534	-1.58121	7.17254	0.193209	NEK10	4.61056	8.67187	6.90038	4.6413
NM_152536	-0.935208	7.33142	0.302695	FGD5	7.09764	8.15987	6.46313	7.05541
NM_152551	-0.888972	4.07044	0.393749	SNRNP48	4.80992	3.96873	2.41477	4.19762
NM_152557	-0.785203	4.34699	0.391259	ZNF746	4.52889	4.82021	3.89319	3.90099
NM_152617	-0.7203	3.99796	0.466791	RNF168	4.05938	4.52376	3.24792	3.86978
NM_152622	-0.650806	4.99753	0.466243	MIER3	5.50545	5.02938	3.65697	5.21765
NM_152626	-0.706174	4.93764	0.420915	ZNF92	4.96129	5.48646	3.85261	5.00909
NM_152640	-0.856427	5.48359	0.316042	DCP1B	5.9775	5.70828	4.29434	5.46393
NM_152663	-0.786647	7.29798	0.393825	RALGPS2	7.42475	7.82467	5.93343	7.4093
NM_152707	-0.735111	4.09208	0.449001	SLC25A16	3.88855	4.78769	3.67778	3.66687
NM_152727	-0.617941	5.08822	0.482236	CPNE2	4.60444	5.85152	5.09722	4.26314
NM_152783	-0.801054	3.96827	0.441024	D2HGDH	3.45727	4.83089	3.9584	2.81825
NM_152791	-1.03655	2.32264	0.465299	ZNF555	2.83928	2.61041	1.74978	1.637
NM_152827	-1.2982	4.53582	0.15084	SNX3	4.76123	5.27985	3.35512	4.05692
NM_152896	-0.638893	7.51163	0.49471	UHRF2	7.77059	7.82133	6.08419	7.7664
NM_152945	-1.08732	3.77354	0.31584	RBM45	4.73905	3.39431	2.37711	3.63009
NM_152996	-0.9054	9.34577	0.333789	ST6GALNAC3	9.30469	10.0558	8.20458	9.25491
NM_153026	-1.27959	9.12561	0.211149	PRICKLE1	9.53575	9.71499	6.61914	9.11303
NM_153051	-0.612196	6.50502	0.496971	MTMR3	6.59895	6.93903	5.3087	6.70228
NM_153236	-1.74249	4.03352	0.149363	GIMAP7	5.31243	3.45079	0.657141	3.77189
NM_153348	-0.798106	6.72233	0.371441	FBXW8	6.77549	7.3092	5.61405	6.71843
NM_153365	-0.625884	5.70146	0.479373	TAPT1	6.25655	5.64009	4.37616	5.93517
NM_153631	-0.839515	4.03669	0.393204	HOXA3	4.09474	4.63153	3.77268	3.28054
NM_153689	-1.36998	3.59625	0.209861	C2orf69	4.18775	4.06233	2.09728	3.21582
NM_170600	-1.01566	6.59645	0.274802	SH2D3C	6.08472	7.5784	5.45444	6.39767
NM_170784	-0.769623	5.15936	0.395655	MKKS	5.95121	4.82021	3.81085	5.28228
NM_171982	-1.00822	3.87629	0.316726	TRIM35	4.09474	4.46328	3.08617	3.4589
NM_173075	-0.864953	9.95466	0.366855	APBB2	9.74932	10.7328	8.69056	9.95686
NM_173165	-0.810417	5.47508	0.337747	NFATC3	5.1992	6.2559	4.97649	5.04678
NM_173217	-1.20415	7.22107	0.197235	ST6GAL1	6.67685	8.29375	6.35267	6.62806
NM_173521	-1.46806	5.04762	0.102941	C9orf84	4.60444	6.18692	3.96688	4.28696
NM_173546	-1.19638	2.42346	0.390075	KLHDC8B	2.99712	2.77429	1.56115	1.8223
NM_173552	-1.11142	5.56832	0.268983	C3orf58	6.58503	5.08397	3.09393	5.69219
NM_173557	-1.45568	6.57762	0.105921	RNF152	6.64739	7.4902	5.22284	6.01816
NM_173566	-0.679449	5.623	0.420027	PRR14L	5.4209	6.29306	4.93821	5.49494
NM_173567	-1.0239	3.04427	0.394924	EPHX4	3.51062	3.39431	2.60054	2.23531
NM_173647	-0.929854	6.72227	0.296142	RNF149	6.52472	7.53007	5.89175	6.42655
NM_173674	-0.787763	7.48489	0.389917	DCBLD1	7.8295	7.822	6.20644	7.56273
NM_173683	-0.722461	7.56845	0.429619	XKR6	7.1085	8.38625	7.12148	7.20148
NM_173810	-1.25072	2.53989	0.358696	TTC9C	2.6854	3.30522	1.49236	2.02477
NM_174921	-0.772303	3.81653	0.449113	SMIM14	3.9283	4.33411	3.26863	3.47281
NM_175061	-0.689606	8.38862	0.453801	JAZF1	8.52894	8.83956	7.34723	8.45243
NM_175066	-1.72459	1.42334	0.342888	DDX51	1.06244	2.55995	0.888882	-0.855549
NM_175571	-1.11752	5.82416	0.223792	GIMAP8	6.42752	6.11228	3.87079	5.83369
NM_175609	-0.928005	4.77274	0.300419	ARFGAP1	4.32064	5.68787	4.24293	4.22254
NM_175872	-2.0699	3.31204	0.0762659	ZNF792	4.07717	3.92952	1.96814	1.90673
NM_175907	-0.842047	4.48911	0.381781	ZADH2	4.91257	4.78769	2.81288	4.65967
NM_176792	-1.568	1.09066	0.387708	MRPL43	1.49184	1.75623	0.162182	-0.0307499
NM_176795	-1.22135	2.35873	0.394206	HRAS	2.31746	3.21026	1.53858	1.68561
NM_176801	-1.02604	6.22326	0.250705	ADD1	6.11733	7.03335	5.18701	5.95513
NM_176819	-1.23878	7.01841	0.197052	CXorf36	6.15132	8.19543	6.11693	6.40857
NM_177560	-0.797141	6.31085	0.370825	CSNK2A1	6.39951	6.8721	5.18338	6.31705
NM_178031	-0.920835	4.26009	0.375501	TMEM132A	3.15622	5.35576	4.14175	3.11295
NM_178126	-1.00938	4.31417	0.284455	FAM134C	4.44916	4.96782	3.26176	4.07527
NM_178169	-1.05351	6.79191	0.245395	RASSF3	6.55994	7.67787	5.71435	6.5183
NM_178326	-0.693292	5.08142	0.415563	ATG4B	4.80459	5.79537	4.73737	4.6413
NM_178439	-0.630163	4.72433	0.478427	GMCL1	5.0314	4.97746	3.6622	4.85293
NM_178450	-0.723793	8.40685	0.429941	2003-03-01	8.49128	8.92397	7.42887	8.40831
NM_178558	-0.970049	4.85908	0.290651	ZNF680	5.2432	5.28762	3.18393	4.92048
NM_178812	-0.707851	6.04302	0.416431	MTDH	6.15132	6.53104	5.08753	6.04867
NM_178841	-0.811271	3.37686	0.484995	RNF166	2.83928	4.24908	3.25486	2.41901
NM_180989	-0.679186	4.8048	0.45299	GPR180	5.31992	4.85201	3.57619	4.96054
NM_181336	-0.754676	6.26797	0.423097	LEMD2	6.8691	6.26183	4.57499	6.5082
NM_181698	-1.03569	8.94149	0.266817	CCNY	8.8851	9.72969	7.84587	8.69616
NM_181786	-0.83399	5.01005	0.345635	HKR1	4.96129	5.68493	3.7285	5.05143
NM_181869	-0.673657	6.19087	0.459388	APAF1	6.37095	6.59822	4.84933	6.39035
NM_182490	-0.831105	3.37242	0.461063	ZNF227	3.7949	3.64484	2.70556	3.05863
NM_182505	-1.01494	4.98147	0.235789	C9orf85	5.44508	5.35576	3.89763	4.75385
NM_182614	-0.835327	6.54685	0.347707	TMEM255B	6.18862	7.37999	6.08614	6.051
NM_182666	-0.790264	7.26228	0.390274	UBE2E1	7.33055	7.83399	5.94741	7.35211
NM_182688	-0.792398	5.62579	0.340932	UBE2G2	5.6815	6.2055	4.90992	5.39983
NM_182692	-0.904256	8.0535	0.330027	SRPK2	7.87153	8.84055	7.00234	7.91839
NM_182697	-0.780429	7.54217	0.412841	UBE2H	7.39934	8.24068	6.03062	7.70804
NM_182757	-0.939026	7.66421	0.318428	RNF144B	8.1447	7.96762	6.0507	7.72776
NM_182811	-1.08614	6.35232	0.2216	PLCG1	6.35463	7.13272	5.26297	6.051
NM_182922	-0.736294	4.11943	0.445119	HEATR3	4.07717	4.72036	3.76298	3.63009
NM_183078	-0.794764	4.93193	0.343875	RNF8	5.16634	5.37048	4.48343	4.47152
NM_183374	-1.10689	2.96931	0.387731	CYP26C1	2.31746	4.03488	1.8263	2.68115
NM_183381	-0.699108	7.19977	0.461011	RNF13	7.7534	7.21145	5.56604	7.46692
NM_194071	-0.669586	7.15681	0.474809	CREB3L2	6.63843	7.97064	6.05766	7.26483
NM_194260	-0.780237	4.34585	0.422982	UBE2I	3.61173	5.28762	3.73844	4.04765
NM_194291	-0.988303	7.05979	0.335023	TMEM65	7.62247	7.30346	4.40763	7.30233
NM_194442	-0.72127	5.39492	0.416454	LBR	5.98459	5.37413	4.00029	5.57452
NM_194458	-0.737528	4.46644	0.431348	UBE2J2	3.858	5.34463	3.93267	4.1551
NM_197968	-0.662276	7.76106	0.497032	ZMYM2	8.11325	7.99399	5.9204	8.1064
NM_198097	-0.732072	4.21316	0.446303	CCZ1B	3.98594	4.9236	3.56506	4.0004
NM_198120	-0.787647	3.80383	0.486948	EBAG9	4.78307	2.98018	2.22995	3.99076
NM_198229	-0.73517	7.3024	0.42035	RGS12	6.78093	8.15138	6.82605	6.94744
NM_198243	-0.89446	5.27495	0.296997	ASB7	5.80941	5.47969	4.07275	5.22588
NM_198268	-0.687516	5.53074	0.421018	HIPK1	5.72164	5.93802	4.37934	5.64688
NM_198281	-1.16838	3.3845	0.366351	GPRIN3	2.48675	4.51717	3.46091	0.694475
NM_198321	-0.919331	7.57436	0.310545	GALNT10	7.48096	8.32194	6.68933	7.32648
NM_198390	-0.979923	8.42324	0.31522	CMIP	7.53426	9.50308	8.00583	7.67832
NM_198467	-0.647856	5.26065	0.432818	RSBN1L	5.56024	5.53299	4.61598	5.13693
NM_198526	-0.736519	5.81693	0.388606	ZNF710	5.46549	6.59352	5.36108	5.43934
NM_198552	-1.56722	3.94746	0.121666	FAM89A	4.15462	4.82556	2.68516	3.19918
NM_198969	-0.704477	4.04893	0.46999	AES	3.98594	4.6437	3.64117	3.65471
NM_199054	-0.954243	4.42375	0.307579	MKNK2	4.37199	5.16638	3.30251	4.27906
NM_199171	-1.18956	6.65587	0.209731	PMEPA1	5.82528	7.80518	5.82105	6.05331
NM_199361	-0.919023	4.35316	0.347911	TPD52L2	3.59947	5.36314	3.9711	3.64245
NM_201274	-0.644431	7.55016	0.481847	MPRIP	7.03303	8.34913	7.07911	7.29647
NM_201557	-1.18994	7.32408	0.180686	FHL2	7.45908	8.07483	6.44201	6.76016
NM_201999	-0.691966	5.99527	0.442195	ELF2	6.45499	6.12752	4.60516	6.19645
NM_203288	-0.782627	4.03751	0.427909	RP9	4.68206	3.97837	3.2958	3.83788
NM_203301	-0.824957	4.82096	0.385402	FBXO33	5.38564	4.93355	2.98131	5.04678
NM_203351	-0.812629	6.56849	0.368084	MAP3K3	6.55042	7.21145	5.3514	6.59981
NM_203370	-2.12144	1.43581	0.236773	FAM212A	2.75336	1.00994	-0.244357	0.253432
NM_203506	-0.839557	5.61552	0.315458	GRB2	5.54114	6.30652	4.9011	5.33656
NM_206963	-0.864295	5.00506	0.321696	RARRES1	4.76123	5.80081	4.06882	4.8476
NM_207116	-0.743973	6.87697	0.402306	RNF216	6.66219	7.59259	6.14521	6.71405
NM_207309	-1.64191	1.3891	0.343623	UAP1L1	2.01923	1.92521	0.0389738	0.596202
NM_207318	-0.829685	4.44055	0.373943	FAM199X	4.72783	4.86246	3.21272	4.46458
NM_207327	-1.12025	2.06008	0.465007	CDPF1	1.82232	2.94129	1.53858	1.17484
NM_207354	-1.05601	3.67875	0.315878	ANKRD13D	3.78411	4.37117	2.98965	3.11295
NM_207356	-1.03328	2.23249	0.483321	C1orf174	2.4325	2.81789	1.6268	1.58671
NM_207380	-1.32985	3.42994	0.260797	C15orf52	2.88039	4.5563	2.00152	3.05863
NM_207381	-0.976782	6.0747	0.263368	TNFAIP8L3	6.44817	6.51457	5.05809	5.84711
NM_207446	-1.80661	4.67821	0.0482231	FAM174B	4.77219	5.70828	3.81555	3.11295
NM_207660	-0.633306	5.22935	0.446896	ZC3H14	5.4209	5.59382	4.51556	5.16719
NM_213566	-0.990599	2.41957	0.489458	DFFA	2.22473	3.21026	2.24397	1.17484
NM_213601	-0.745405	3.71127	0.473793	TMED8	3.68317	4.31142	3.03872	3.50024
NM_214461	-1.00368	2.46363	0.48599	C2orf27B	1.7795	3.49175	1.34409	2.2676

## Sheet: 0_vs_60_min_TNFa_upregulated
RefSeq	Log2_FC	logCPM	Pval	Symbol	0.rep1	0.rep2	60.rep2	60.rep1
NM_000021	0.748813	6.19756	0.201297	PSEN1	5.73796	5.80858	6.54716	6.49701
NM_000031	0.917845	2.4494	0.18301	ALAD	1.72141	2.06991	2.49558	3.09756
NM_000100	0.79381	3.46154	0.309025	CSTB	3.62752	1.93336	2.87244	4.38018
NM_000127	1.10068	11.1211	0.0855037	EXT1	10.0323	10.8025	11.8322	11.2463
NM_000138	0.912337	9.5855	0.282017	FBN1	9.83301	7.27087	8.87876	10.5856
NM_000140	0.637319	4.46246	0.284069	FECH	4.06608	4.13452	4.9066	4.54303
NM_000201	6.76051	7.32386	4.13767e-18	ICAM1	1.45264	1.65807	8.48447	8.1172
NM_000214	2.47167	7.55629	0.000139643	JAG1	6.08229	5.56748	7.92154	8.63081
NM_000228	2.15415	5.41329	0.0522721	LAMB3	0.417707	4.89682	6.89202	4.2913
NM_000304	1.03134	5.90301	0.0815107	PMP22	5.02404	5.52356	6.55062	6.05923
NM_000358	0.797095	2.17986	0.301387	TGFBI	1.24087	2.00325	2.916	1.76769
NM_000393	0.628102	8.29653	0.306895	COL5A2	8.07286	7.8123	8.24504	8.84615
NM_000395	1.19928	4.2088	0.0628011	CSF2RB	3.90448	2.91	4.38565	4.94382
NM_000416	1.97195	6.4699	0.008172	IFNGR1	5.63866	4.49138	5.98475	7.78419
NM_000447	1.33702	3.74561	0.0321058	PSEN2	2.87078	2.981	4.27291	4.25146
NM_000450	9.58738	10.9992	5.39862e-14	SELE	2.87078	1.74222	9.50617	12.8636
NM_000494	0.828962	1.85493	0.245681	COL17A1	1.40254	1.26161	2.21085	2.10226
NM_000575	3.28461	4.454	7.66468e-06	IL1A	2.20335	1.89711	4.35433	5.92217
NM_000584	7.29985	7.66212	1.48625e-10	CXCL8	0.200335	2.00325	6.59485	9.4748
NM_000593	1.8865	1.35854	0.0183981	TAP1	-0.0556994	0.220815	2.17544	1.69035
NM_000600	1.73335	3.89445	0.0157961	IL6	2.9773	2.60747	3.47754	5.14564
NM_000602	1.202	8.26827	0.0479224	SERPINE1	7.47338	7.61437	8.75642	8.73859
NM_000610	1.52449	8.01872	0.0402403	CD44	5.98137	7.67451	9.08155	7.82998
NM_000629	1.32882	5.8926	0.0312339	IFNAR1	5.31896	4.80196	5.88142	6.80056
NM_000758	6.61275	4.06585	3.31895e-13	CSF2	-5.16151	-0.532296	4.91199	5.2232
NM_000825	0.697905	2.10367	0.344499	GNRH1	2.01612	1.26161	1.8998	2.76176
NM_000837	1.70177	1.85277	0.0195483	GRINA	0.69248	0.794202	2.57924	2.27114
NM_000891	1.11013	4.32141	0.317571	KCNJ2	4.45206	1.93336	1.0343	5.74225
NM_000935	0.65766	9.06708	0.286135	PLOD2	8.53234	8.85152	9.60033	9.06733
NM_000941	0.609492	4.67967	0.317518	POR	3.89545	4.67388	5.05035	4.83122
NM_000958	0.754105	5.58329	0.267816	PTGER4	5.52617	4.66852	4.88484	6.51114
NM_000959	2.55809	4.46906	0.00162748	PTGFR	3.37815	1.42331	4.23901	5.86172
NM_001001436	1.0327	4.69204	0.0905089	C16orf87	4.23305	3.92543	4.7226	5.43362
NM_001001578	0.990738	1.63062	0.19115	PDE9A	0.51523	1.37139	1.94255	2.04127
NM_001001974	1.30721	8.1441	0.0417437	PLEKHA1	7.50563	7.17098	8.10092	9.05485
NM_001002926	0.738873	4.04343	0.331021	TWISTNB	4.2041	2.67326	3.27499	4.99296
NM_001003794	0.912223	7.56093	0.29126	MGLL	5.43566	7.77095	8.67517	6.38488
NM_001003943	0.626433	4.71773	0.302826	BMF	4.69516	3.9344	5.10312	4.86681
NM_001005207	0.685834	7.01944	0.249364	TRIM37	6.75016	6.51118	7.17799	7.45209
NM_001005376	0.771427	3.96416	0.381154	PLAUR	2.31589	4.14229	5.06493	2.32331
NM_001005404	0.814242	7.49724	0.220612	YPEL2	6.40051	7.46989	8.27984	7.22239
NM_001005474	2.10278	8.24773	0.00928546	NFKBIZ	7.45045	5.78148	7.7004	9.60662
NM_001005567	0.665948	1.61606	0.385572	OR51B5	0.923199	1.42331	1.50271	2.16078
NM_001006600	1.11992	8.97696	0.100547	ERBB2IP	8.61682	7.9235	8.58613	9.96093
NM_001006641	0.789638	5.00963	0.181046	SLC25A25	4.5005	4.61929	5.01072	5.62764
NM_001006932	0.956952	9.66793	0.126454	RPS6KA2	8.87428	9.31494	10.3245	9.75645
NM_001007024	0.604656	6.15929	0.310264	GOSR1	5.98988	5.63783	6.17603	6.64527
NM_001007068	1.7885	8.77949	0.0154617	SDCBP	8.03636	7.04823	8.30565	10.0332
NM_001007237	1.42982	0.7714	0.0805958	IGSF3	0.200335	-0.745004	1.11127	1.33134
NM_001007245	0.811255	7.18262	0.229587	IFRD1	7.15094	6.10724	6.77714	8.02669
NM_001007538	1.05109	0.981544	0.187179	SHISA2	0.200335	0.333629	1.38365	1.22566
NM_001007595	2.41886	2.50722	0.00216315	C2CD4B	0.992576	0.794202	2.31213	3.90289
NM_001008213	1.67293	6.57366	0.00715619	OPTN	5.80699	5.13337	6.969	7.36766
NM_001008391	0.624938	2.51439	0.461187	CCDC73	2.81442	0.943878	1.76337	3.39436
NM_001008393	0.78527	1.84824	0.296469	C4orf46	1.76172	0.794202	2.06369	2.21701
NM_001008539	4.14323	8.53223	1.69104e-07	SLC7A2	5.76547	4.64685	8.57088	9.99902
NM_001008564	0.727426	6.70579	0.257119	NUP58	6.63011	5.86363	6.42811	7.44622
NM_001009565	0.659657	2.33829	0.357107	CDKL4	1.63727	2.16445	2.89439	2.16078
NM_001010905	4.0413	2.12294	4.0509e-05	C6orf58	-0.552428	-1.29658	1.76337	3.83264
NM_001010911	1.73503	1.10181	0.0306378	CASC10	-0.0556994	-0.0353182	1.50271	1.8411
NM_001010942	0.763088	7.74267	0.205453	RAP1B	7.14143	7.46216	8.17785	7.96131
NM_001012302	1.52419	1.60857	0.0586328	ANO9	0.417707	0.87098	1.44441	2.68409
NM_001012393	0.61569	2.42651	0.467775	OPCML	2.58658	1.31755	1.18434	3.44233
NM_001012631	2.97119	3.37457	1.46742e-05	IL32	1.12206	1.37139	4.24756	4.18253
NM_001012762	0.683336	2.27177	0.392219	CTU2	0.923199	2.38991	2.95828	1.8411
NM_001017403	1.34916	1.13629	0.088903	LGR6	0.417707	0.0984251	1.25388	1.91096
NM_001017420	1.4249	3.14298	0.0344751	ESCO2	2.51765	1.96873	3.3563	3.96989
NM_001017536	1.87648	1.52685	0.0154902	VDR	0.313111	0.220815	2.40677	1.76769
NM_001017927	1.50694	5.07193	0.0115632	C2orf76	4.28928	3.96099	5.3573	5.87925
NM_001017975	6.11637	13.2481	0.000576848	HFM1	8.93667	5.97869	6.7352	15.2236
NM_001018020	1.28421	8.53686	0.0388761	TPM1	7.95451	7.52736	8.76687	9.27116
NM_001018058	1.35398	8.17953	0.03907	TFEC	7.60935	7.03369	8.08132	9.13776
NM_001024071	1.28317	3.55563	0.057918	GCH1	3.13903	2.30944	3.62918	4.4046
NM_001024381	0.712057	4.02189	0.292417	TM2D2	3.99178	3.12902	3.58938	4.83122
NM_001024383	1.23189	9.88093	0.077359	NAV3	9.59672	8.4601	9.65297	10.8461
NM_001024465	2.46511	6.60373	9.89697e-05	SOD2	4.86664	4.93755	7.02726	7.64251
NM_001024688	0.971363	6.65306	0.176524	NBN	6.61781	5.24576	6.1166	7.62702
NM_001024844	1.11644	4.63078	0.258389	CD82	1.94789	4.75715	5.91669	2.68409
NM_001025091	1.17892	4.14442	0.057649	ABCF1	3.1081	3.70198	4.67902	4.54303
NM_001025300	0.961055	6.71698	0.107045	RAB12	6.30658	5.99164	7.03469	7.19815
NM_001025603	0.746439	3.02724	0.257459	RFX5	2.69462	2.49068	3.0393	3.59867
NM_001029882	1.08519	5.74108	0.193741	AHDC1	3.59442	5.81101	6.89202	4.68935
NM_001030287	0.883867	4.21302	0.249406	ATF3	4.32334	2.62974	3.5205	5.20941
NM_001031685	0.92339	7.06683	0.128159	TP53BP2	6.69529	6.34953	7.15886	7.70283
NM_001031713	0.982974	4.20497	0.132718	MCUR1	3.95749	3.21989	4.02694	5.04049
NM_001033088	0.963239	1.73586	0.18297	NGRN	0.992576	1.26161	2.02443	2.16078
NM_001033602	0.92818	1.26061	0.25022	MTUS2	0.992576	0.220815	1.38365	1.76769
NM_001034852	0.898775	2.07627	0.213953	SMOC1	1.63727	1.42331	2.13914	2.68409
NM_001035	2.11206	2.2811	0.014407	RYR2	1.12206	0.713106	1.50271	3.77761
NM_001037165	0.743929	5.89157	0.27202	FOXK1	4.41464	6.07108	6.55407	5.76129
NM_001037666	1.38184	1.76642	0.0713154	GATSL3	0.417707	1.26161	2.06369	2.46937
NM_001038707	0.643394	4.47189	0.285851	CDC42SE1	3.85876	4.31711	4.9596	4.49835
NM_001039112	0.603364	2.15568	0.406169	FER1L6	2.11277	1.37139	2.10191	2.64363
NM_001039569	0.631025	3.58453	0.39307	AP1S3	2.04906	3.85156	4.16873	3.41854
NM_001039711	0.841285	3.75357	0.177186	DEDD	3.18421	3.33277	4.32231	3.83264
NM_001040272	0.630415	9.31094	0.299195	ADAMTSL1	8.8335	9.07893	9.49365	9.68379
NM_001040445	0.601692	4.25737	0.319743	ASB1	3.73264	4.07896	4.64059	4.38018
NM_001040697	0.8123	5.62232	0.159897	UEVLD	5.28133	5.02415	5.88963	6.04765
NM_001042353	1.41408	3.55598	0.0319923	FAM110A	2.28857	2.981	4.33841	3.77761
NM_001042481	0.733	9.93493	0.227467	FRMD6	9.62276	9.41428	10.2252	10.2848
NM_001044385	0.93056	5.86718	0.143291	TMEM237	5.65212	4.91506	5.56992	6.72743
NM_001045	2.48696	1.13525	0.00720421	SLC6A4	0.0779903	-1.67898	1.18434	2.42231
NM_001046	1.23487	10.144	0.15908	SLC12A2	10.1537	7.71997	9.17246	11.3444
NM_001065	0.643249	4.64769	0.383119	TNFRSF1A	3.4783	4.78718	5.54932	3.75879
NM_001077197	0.872048	2.61633	0.267578	PDE11A	2.56397	1.47341	2.02443	3.57735
NM_001077418	0.83735	2.88364	0.203384	TMEM231	2.20335	2.56188	3.01946	3.41854
NM_001077442	1.25179	9.03217	0.0438527	HNRNPC	7.95723	8.53464	9.50951	9.54308
NM_001077526	1.03464	6.1227	0.0805653	MTMR14	5.41053	5.6101	6.63124	6.45962
NM_001079519	0.661953	4.47952	0.266275	FAM177A1	4.14438	4.07085	4.47573	5.01692
NM_001079522	0.941649	8.05607	0.178215	KTN1	7.9143	6.94768	7.52777	9.01129
NM_001079691	0.731252	2.18141	0.292998	N4BP2L1	1.76172	1.70076	2.49558	2.42231
NM_001079862	1.80894	4.55507	0.00375249	DBI	3.59442	3.15995	4.82326	5.50312
NM_001080395	1.20035	1.02592	0.229094	AATK	-1.69808	1.01327	1.55875	1.22566
NM_001080412	0.627542	8.29217	0.301852	ZBTB38	8.06734	7.80987	8.36186	8.75531
NM_001080424	1.17087	3.85783	0.0719475	KDM6B	2.541	3.58149	4.40106	4.23794
NM_001080427	0.828679	1.712	0.329072	THSD7B	1.72141	0.438258	1.18434	2.602
NM_001080452	1.00813	3.83531	0.104598	GPR108	3.06043	3.39908	4.28126	4.2105
NM_001080470	1.00399	6.78661	0.092412	ZNF697	6.34854	6.03191	7.12909	7.27301
NM_001080493	0.690091	3.20706	0.301207	ZNF823	2.60885	2.96357	3.80165	3.06728
NM_001080504	0.91212	3.02231	0.162281	RBM44	2.58658	2.36358	3.47754	3.29336
NM_001080976	0.90092	7.06901	0.145004	DSE	6.7651	6.29658	7.03469	7.77368
NM_001083	1.09684	6.65561	0.106039	PDE5A	6.27386	5.68111	6.13745	7.67925
NM_001085399	2.04142	7.94318	0.00184972	RELL1	6.0399	6.98486	8.84676	8.37373
NM_001094	0.62295	2.82182	0.430678	ASIC2	2.96008	1.74222	2.02443	3.72039
NM_001098213	0.671016	8.92583	0.270426	HRH1	8.35888	8.72118	9.32718	9.10926
NM_001098500	0.738222	3.67831	0.290294	KIAA1217	2.65237	3.65932	4.44632	3.26696
NM_001098672	1.13628	3.81789	0.128223	HEPHL1	3.71222	2.2242	3.37202	4.84913
NM_001098817	0.786121	5.46022	0.172831	INO80C	4.88956	5.12556	5.77011	5.826
NM_001099455	0.783619	6.68764	0.189612	CPPED1	6.10987	6.36288	7.19688	6.83016
NM_001099855	1.01025	1.33898	0.228109	MCF2	-0.0556994	1.14278	1.98407	1.22566
NM_001100393	0.839759	1.6697	0.2792	RALYL	0.992576	1.31755	1.25388	2.51495
NM_001100873	1.14133	2.28932	0.138957	C16orf46	1.18269	1.85992	3.24115	1.76769
NM_001102608	0.71693	3.35133	0.258119	COL6A6	2.92502	2.94593	3.64221	3.66082
NM_001102653	0.894692	6.92787	0.139109	OTUD4	6.65841	6.11515	7.12562	7.46811
NM_001104558	2.95464	1.69417	0.000757223	ELOVL7	-0.203055	-0.532296	1.71487	3.12721
NM_001104595	0.766706	5.3428	0.181462	FAM118A	4.94311	4.86901	5.69709	5.64823
NM_001105568	0.631048	8.53881	0.30504	KIF13A	8.37195	7.9793	8.52151	9.06733
NM_001109763	1.73559	1.55904	0.026531	GSG1L	0.923199	-0.346956	2.13914	2.16078
NM_001111018	0.867888	10.4526	0.156408	NAV2	10.077	9.82006	10.9643	10.6643
NM_001111283	0.991307	2.73611	0.199513	IGF1	2.65237	1.42331	2.2454	3.72039
NM_001113348	0.965471	8.2277	0.162967	ECE1	6.90662	8.1594	9.08393	7.96439
NM_001113546	0.785106	5.2332	0.172846	LIMA1	4.85271	4.71612	5.47846	5.65842
NM_001115	0.942156	4.16088	0.329822	ADCY8	4.43347	1.65807	2.46658	5.39758
NM_001122679	0.812014	2.35981	0.317069	TENM2	2.26072	1.42331	1.44441	3.39436
NM_001123377	0.790098	4.04203	0.200041	PARK7	3.40385	3.74341	4.58095	4.1249
NM_001124758	1.3844	5.92336	0.0499198	SPNS2	4.26144	5.58182	7.01354	5.51439
NM_001126050	1.4549	5.52519	0.0150203	HDGF	4.28237	4.89682	6.18719	5.95561
NM_001126114	1.06595	3.62725	0.118831	TP53	2.49392	3.34628	4.47573	3.41854
NM_001127323	0.751917	2.29713	0.333259	GRM8	2.17378	1.47341	1.71487	3.18474
NM_001127401	0.65152	6.25759	0.322583	YPEL5	6.2929	5.34667	5.82541	7.02782
NM_001127713	1.50891	5.39668	0.0334516	ATL1	4.96916	3.6701	5.00569	6.54448
NM_001127716	0.601997	6.44742	0.308826	ETFA	5.93807	6.27025	6.7352	6.69562
NM_001128161	0.910211	6.8995	0.124945	UBP1	6.4037	6.34281	7.18246	7.37849
NM_001128226	0.747137	5.92914	0.261605	DIS3	5.95988	4.85017	5.46019	6.76799
NM_001128303	1.21206	3.68087	0.120078	LACC1	3.59442	1.82174	3.25817	4.73821
NM_001128306	1.1071	9.51786	0.0993339	PLSCR4	9.14289	8.5101	9.21259	10.4614
NM_001128922	1.90479	4.83232	0.00161973	LRRC32	3.33873	3.8034	5.57672	5.40365
NM_001130017	1.09844	1.58661	0.146624	ART3	0.923199	0.87098	1.8103	2.16078
NM_001130046	5.61523	4.38841	1.56824e-08	CCL20	-0.552428	0.0984251	3.492	6.19843
NM_001131027	1.00933	5.66521	0.114161	PDLIM4	4.68994	5.37	6.55923	5.34807
NM_001134338	0.915237	5.03581	0.168865	RNF24	3.6915	5.01572	5.82255	4.8402
NM_001134369	0.893334	8.5103	0.173679	LRRFIP2	8.35229	7.52141	8.29538	9.30884
NM_001134418	1.90107	5.91916	0.00741408	P3H2	5.23556	3.77372	5.80818	7.0856
NM_001134437	1.40195	9.26608	0.0230952	PHLDB2	8.46605	8.33356	9.62104	9.96504
NM_001134445	0.927753	10.6128	0.143817	DDAH1	10.2778	9.84034	10.5545	11.3452
NM_001134745	0.67084	1.78323	0.410864	LRRTM4	1.72141	0.943878	1.11127	2.64363
NM_001135	1.35315	0.941194	0.0980431	ACAN	0.200335	-0.182739	1.55875	1.11162
NM_001135186	0.84624	4.25303	0.170967	ABI3	3.50228	3.97844	4.86831	4.27814
NM_001135748	1.15823	3.27131	0.116067	NEIL2	1.94789	2.981	4.25606	2.79908
NM_001135823	1.75305	0.668297	0.03866	SSPN	-0.203055	-0.99459	1.25388	1.11162
NM_001136541	0.714186	2.45215	0.324167	APOL1	2.28857	1.65807	3.07816	2.21701
NM_001142298	1.251	7.29179	0.0379794	SQSTM1	6.70178	6.34617	7.78506	7.78651
NM_001142308	0.735867	1.65575	0.326474	MALRD1	1.24087	1.14278	1.66469	2.16078
NM_001142395	0.962029	8.87226	0.137308	PRRG1	8.61304	7.93304	8.74212	9.66306
NM_001142446	1.0404	2.64819	0.155694	ANK1	2.28857	1.74222	2.34437	3.57735
NM_001142601	1.06983	2.5748	0.157297	SPHK1	1.12206	2.41577	3.38758	2.37366
NM_001142699	2.95267	11.6762	0.0183271	DLG2	10.3358	7.68252	8.18733	13.4646
NM_001142772	0.722188	2.56094	0.401307	PCDH15	2.63077	1.47341	1.18434	3.66082
NM_001142807	1.2711	3.16268	0.0527964	ACOXL	2.63077	2.10211	3.53454	3.77761
NM_001142864	0.918444	5.85094	0.182108	PIEZO1	4.46433	5.8471	6.7458	5.42768
NM_001143820	2.03372	10.1303	0.0025871	ETS1	9.18726	8.21523	10.3973	11.1391
NM_001143890	0.682514	4.84328	0.24051	BSDC1	4.43347	4.47917	5.27605	4.98489
NM_001144823	0.788711	7.40684	0.189159	DENND4A	6.74388	7.14609	7.63999	7.8479
NM_001144832	1.22907	3.55226	0.0591193	TTC39A	2.3949	3.12902	4.03684	4.0339
NM_001144884	1.59652	8.45571	0.0201094	SLC30A7	7.69704	7.14706	8.14848	9.5934
NM_001144924	1.20936	5.35024	0.067526	LOC81691	5.09279	3.9344	5.16761	6.29303
NM_001145020	0.634378	2.62107	0.381472	C6orf52	2.69462	1.61407	2.43699	3.24007
NM_001145099	2.08527	3.97807	0.00104463	SLC2A6	2.36904	2.79648	4.58095	4.77614
NM_001145152	0.785609	6.7231	0.209764	VPS37A	6.40688	6.13669	6.46707	7.48538
NM_001145305	0.814071	0.84403	0.337547	KIAA1683	0.773556	-0.532296	1.0343	1.11162
NM_001145306	1.16903	9.52866	0.0856014	CDK6	9.21972	8.29184	9.3107	10.4619
NM_001145312	1.13866	4.82925	0.0789429	ETV3	4.56455	3.58149	4.68533	5.72296
NM_001145357	0.995936	5.95531	0.0860141	SIN3A	5.30879	5.43466	6.2288	6.49701
NM_001145398	1.45097	1.76159	0.0534112	TEF	0.69248	0.943878	2.49558	1.97758
NM_001145443	1.37975	7.27084	0.0521526	PFKFB3	5.32905	7.03578	8.15588	7.32831
NM_001145657	0.688342	1.05759	0.378678	RAP1GAP	0.417707	0.713106	1.18434	1.33134
NM_001145716	1.45337	1.77471	0.0571117	PNPLA1	0.417707	1.20342	2.02443	2.55913
NM_001145909	0.670364	10.118	0.27089	TANC1	9.61057	9.86635	10.5141	10.3074
NM_001146020	0.749138	3.8508	0.269829	TJAP1	2.88909	3.79358	4.5877	3.53373
NM_001146216	0.601196	8.67821	0.329464	TACC1	8.50106	8.17321	8.60912	9.22176
NM_001146319	1.55292	5.38183	0.0537289	GRAMD3	5.07691	3.15995	4.62755	6.65294
NM_001154	1.01699	7.58585	0.127463	ANXA5	7.37938	6.45617	7.30834	8.47666
NM_001159322	0.872155	5.78978	0.17284	PLA2G4C	4.69516	5.70228	6.5712	5.56942
NM_001159575	1.6907	0.61984	0.0450336	SCNN1A	-0.552428	-0.532296	1.0343	1.22566
NM_001161354	0.914158	1.2296	0.26465	PLEKHA4	-0.0556994	1.07948	1.61269	1.42981
NM_001161404	0.663649	4.33208	0.3919	LIMS2	4.61492	2.75657	3.57586	5.23687
NM_001161574	0.795739	5.46318	0.272586	MAFF	4.08208	5.5617	6.40154	4.73821
NM_001161661	2.64641	0.424449	0.00440463	WWC1	-1.0144	-2.20081	1.11127	1.11162
NM_001164440	2.57163	6.62418	0.000220138	ANKRD33B	4.33005	5.19813	7.88159	6.66815
NM_001164615	1.42648	7.07227	0.0354766	FZD6	6.66506	5.48133	7.00852	8.04525
NM_001164749	0.777799	4.95886	0.232943	NPAS3	4.69516	4.32396	4.36222	5.86612
NM_001166116	0.89288	2.36279	0.199743	TMOD1	1.72141	1.89711	2.95828	2.37366
NM_001166208	1.01357	5.53804	0.0806127	SYNPO	5.0323	4.85017	5.80818	6.09343
NM_001166246	0.716127	1.93028	0.360379	HPSE2	1.67995	1.31755	1.32023	2.79908
NM_001167576	2.01479	0.951786	0.0178764	TRPC7	-0.203055	-0.745004	1.85574	1.11162
NM_001167675	1.1488	2.12133	0.213992	CADM2	2.1436	0.0984251	1.18434	3.31928
NM_001167989	0.728186	1.8842	0.341968	PQBP1	0.850317	1.82174	2.37591	1.8411
NM_001170414	0.838387	7.72546	0.163526	TJP2	7.37289	7.10695	7.97142	8.18926
NM_001170553	1.32038	1.95864	0.090178	VSIG1	1.05877	1.26161	1.61269	3.03636
NM_001170726	0.623907	2.10889	0.379931	GPR137	1.45264	1.93336	2.52401	2.10226
NM_001171251	0.629425	2.2662	0.386096	C17orf53	1.59328	2.10211	2.75742	2.16078
NM_001171654	1.0119	7.08025	0.110749	KLHL5	6.83051	6.03817	7.05675	7.83897
NM_001171747	1.47186	3.95262	0.0388823	C3orf52	3.53753	2.30944	3.78999	5.00898
NM_001172743	0.848202	0.961694	0.300463	RAI2	-0.0556994	0.713106	1.11127	1.33134
NM_001173498	1.41689	3.07752	0.047223	MAN2B1	1.50106	2.65167	3.93466	3.15626
NM_001174080	1.02578	1.32447	0.196288	CACNA1A	1.05877	0.0984251	1.66469	1.69035
NM_001178055	1.29649	2.2688	0.0958583	PARP8	2.01612	0.627179	2.27915	3.15626
NM_001178074	0.676465	2.11912	0.351811	GRIP1	2.04906	1.26161	2.13914	2.602
NM_001178081	0.956866	5.12926	0.113514	STAT6	4.12906	4.90597	5.76416	5.23687
NM_001178096	6.00059	6.77492	1.18813e-07	F3	2.26072	1.01327	4.98026	8.65455
NM_001190945	5.48058	6.44134	3.43564e-13	TRAF1	1.87628	2.00325	6.89339	7.80038
NM_001191058	0.825964	5.1731	0.152781	PDE1C	4.52997	4.85017	5.59359	5.45131
NM_001193321	1.12512	4.89285	0.0783187	IKBKE	3.71222	4.5912	5.74919	4.76675
NM_001193509	0.718868	6.35653	0.222168	TTC27	5.86364	6.034	6.72605	6.61158
NM_001193570	0.865417	5.5688	0.137646	CSRP1	4.82445	5.28136	5.89509	5.97612
NM_001193583	0.783451	9.44085	0.254247	NRCAM	9.37575	8.4813	8.95675	10.3013
NM_001194997	0.837173	6.13652	0.19017	CARS	5.01156	6.09928	6.78304	6.12684
NM_001195156	0.823487	3.67501	0.190605	ZMYM6NB	3.24233	3.15995	3.74239	4.26486
NM_001195685	1.98548	6.0889	0.00505533	LYPD6	5.25687	4.07896	5.94061	7.29441
NM_001197238	1.31691	3.52376	0.0383665	BTN2A2	2.60885	2.81603	4.13226	3.91994
NM_001197319	1.85623	5.43319	0.00725986	CLEC2D	4.32334	4.14229	4.93334	6.72743
NM_001198617	0.621041	2.31161	0.410459	MAP7	2.4203	1.20342	2.37591	2.72345
NM_001198807	1.34838	4.92775	0.0213171	MSANTD3	3.97474	4.21772	5.54239	5.34807
NM_001198812	0.827167	5.81852	0.148969	MSANTD3-TMEFF1	5.29513	5.39296	6.20486	6.13781
NM_001199380	1.5985	8.06377	0.0230306	RNF145	7.37938	6.63605	7.69103	9.22605
NM_001199975	0.736423	3.3426	0.333818	UQCRB	3.50228	1.96873	2.80454	4.2105
NM_001200	2.90046	5.54281	5.5517e-06	BMP2	3.35199	3.58149	5.94325	6.70056
NM_001202439	1.12503	4.27339	0.10492	NCR3LG1	3.90448	3.24894	3.75444	5.32267
NM_001202517	0.905141	7.765	0.136354	CFLAR	7.21766	7.26733	7.87471	8.37759
NM_001204144	0.95056	9.52875	0.386785	HDAC9	9.85544	6.34953	7.1452	10.8189
NM_001204204	0.662564	4.36899	0.274815	SEC14L2	3.71222	4.23235	4.4974	4.80394
NM_001204240	1.32173	4.28904	0.0582589	TBC1D10A	2.51765	4.04623	5.15857	4.30434
NM_001204299	0.742178	3.33141	0.262873	ZNF664-FAM101A	2.79513	3.01523	3.17097	4.01816
NM_001204403	0.619717	6.11154	0.296274	ANK3	5.55799	5.95022	6.2417	6.51955
NM_001206	1.36062	5.11673	0.0214161	KLF9	4.38914	4.17293	5.34937	5.89226
NM_001206745	1.48935	0.887843	0.0629232	TPO	-0.367191	0.0984251	1.38365	1.33134
NM_001206747	1.10475	6.48255	0.111435	CAV2	6.24039	5.25295	5.98219	7.50387
NM_001206850	0.810961	9.17035	0.180373	NLGN4Y	8.64705	8.76741	9.53636	9.50229
NM_001206901	0.806186	8.07086	0.245609	TAX1BP1	8.08631	6.90268	7.65533	8.91576
NM_001207039	2.61847	2.29439	0.00144915	ETV7	0.69248	0.333629	2.10191	3.73972
NM_001242581	0.932062	9.39194	0.144708	RIN2	8.27652	9.26202	9.83258	9.73343
NM_001243042	1.07951	2.90596	0.176151	HLA-C	2.85224	1.31755	2.40677	3.93678
NM_001243093	0.622081	1.65553	0.406576	FYB	1.24087	1.26161	1.76337	1.97758
NM_001243116	1.93731	2.64387	0.00552632	NFKBIB	1.12206	1.61407	3.07816	3.53373
NM_001243439	1.12073	5.90948	0.0641337	SPECC1	4.781	5.59036	6.54716	6.14869
NM_001243766	1.04069	3.02994	0.109712	POMGNT1	2.28857	2.5148	3.492	3.39436
NM_001243985	0.610926	5.01622	0.289352	RELA	4.70552	4.64138	5.36124	5.20246
NM_001244752	1.04954	4.36365	0.0857927	ANKRD18B	3.84944	3.63751	4.4611	5.07132
NM_001244764	4.38984	4.18757	3.71693e-06	TNIP3	1.59328	-1.29658	4.1597	5.74225
NM_001248003	1.38129	6.2561	0.0214914	ARNTL2	5.30879	5.49655	6.99335	6.54448
NM_001251901	5.20088	3.15279	4.61397e-09	CD83	-2.21908	-0.346956	3.70563	4.50965
NM_001252102	0.677682	3.07335	0.304021	KIF21B	2.87078	2.44117	3.53454	3.12721
NM_001252226	1.01699	7.65031	0.141251	PLK2	7.43574	6.53644	7.15091	8.63016
NM_001252290	0.636663	2.70225	0.471083	TNFSF8	0.417707	3.09741	3.38758	2.27114
NM_001252390	2.84131	7.98914	9.99709e-06	TNIP1	5.81659	6.09128	8.91945	8.67288
NM_001253884	0.735524	5.73486	0.241096	ALPK1	5.6734	4.8549	5.47118	6.47412
NM_001254736	0.858437	6.48776	0.201327	NABP1	6.38447	5.46594	6.03747	7.3754
NM_001256011	0.804984	6.19291	0.245511	PNPLA8	6.20428	5.04086	5.63653	7.09501
NM_001256166	2.08778	6.88525	0.000970597	BIRC2	5.62233	5.35671	7.15886	7.91106
NM_001256295	1.2683	6.0314	0.0405604	ETS2	4.68994	5.67041	6.64586	6.40317
NM_001256379	1.0616	6.41086	0.0860326	MCMBP	5.93146	5.62403	6.3568	7.21378
NM_001256676	0.766872	2.06286	0.289187	STOML1	1.76172	1.42331	1.98407	2.68409
NM_001256802	0.824383	6.35741	0.161693	RPS3	5.93146	5.83995	6.641	6.77737
NM_001257963	0.852329	3.11936	0.324687	PDLIM3	3.29821	1.42331	1.94255	4.23794
NM_001258282	0.9691	2.8449	0.172134	LINGO2	2.28857	2.28158	2.49558	3.75879
NM_001258343	1.42167	3.88568	0.024229	SLC44A3	2.9773	3.04867	4.11368	4.69926
NM_001260	0.672402	7.67864	0.265935	CDK8	7.16322	7.43001	8.17394	7.74408
NM_001261397	1.63374	5.0546	0.00620218	P2RX4	3.98329	4.06269	5.3334	5.92217
NM_001265588	0.940454	7.13873	0.127128	ZNF267	6.75391	6.41349	7.10577	7.8645
NM_001267709	1.06133	4.16443	0.15458	ZNF706	4.01698	2.85435	3.40296	5.26382
NM_001267713	1.54356	3.00845	0.0283486	IL3RA	2.28857	1.78253	2.95828	4.04947
NM_001270	0.927277	8.1077	0.176554	CHD1	7.95125	7.05442	7.66334	9.02464
NM_001270383	2.3128	3.33203	0.00247491	ENKUR	2.34271	0.87098	3.43326	4.55399
NM_001270407	1.62808	2.03425	0.0337577	JAM2	1.24087	0.627179	2.99936	1.97758
NM_001270520	1.39449	8.76721	0.0286316	DAAM1	7.90814	7.90821	8.7846	9.68317
NM_001270616	1.41825	5.17232	0.018898	PROX1	4.19677	4.39717	5.26767	6.06307
NM_001270679	0.62252	7.92726	0.321587	MCU	7.81904	7.2998	7.74637	8.55306
NM_001270943	2.42553	10.4122	0.000239105	KLF7	8.81177	8.66602	10.6756	11.5317
NM_001271012	0.668703	10.249	0.269143	FLI1	9.89236	9.85975	10.5867	10.5017
NM_001271187	1.6301	4.71328	0.0239645	RAP2C	4.15198	3.01523	4.27291	5.92639
NM_001271213	1.54797	3.63092	0.0145407	SQRDL	2.71529	2.60747	4.15061	4.26486
NM_001271634	0.713903	6.27401	0.264871	RQCD1	6.15974	5.5176	5.90863	7.04928
NM_001271754	0.639673	7.8248	0.30251	ITGBL1	7.77664	7.0789	7.8809	8.30648
NM_001271828	0.831705	1.95656	0.234985	PRELID1	1.40254	1.47341	2.31213	2.21701
NM_001271833	0.954966	1.65309	0.213466	DENND2D	0.923199	1.20342	1.50271	2.42231
NM_001271854	0.808734	7.67858	0.182101	GPR176	7.32073	7.10794	7.76881	8.2461
NM_001273	1.23137	5.81955	0.038544	CHD4	4.80047	5.30577	6.52974	6.03987
NM_001277145	1.39822	5.92278	0.0232351	ZBTB10	5.21394	4.89682	5.8978	6.86797
NM_001277378	0.797064	2.16208	0.324568	C19orf67	1.94789	1.42331	1.25388	3.18474
NM_001278460	0.67197	8.67512	0.458555	COBLL1	9.04983	6.65517	7.07127	9.7659
NM_001278530	1.34261	1.74774	0.0648343	ARHGEF40	1.18269	0.535809	2.2454	2.21701
NM_001280542	0.73188	6.82825	0.378316	DPF3	4.96485	7.12077	7.84685	5.7181
NM_001280560	1.10186	2.84574	0.10322	ANP32E	1.83909	2.46614	3.116	3.44233
NM_001281535	1.21098	8.27521	0.0509659	EPB41L3	7.20584	7.8214	8.8344	8.6754
NM_001282174	0.705458	5.28703	0.26887	MSL3	5.203	4.49745	4.86275	6.0859
NM_001282211	2.79171	0.974998	0.00136499	NDRG2	-1.0144	-0.99459	1.66469	1.8411
NM_001282357	0.624384	1.62497	0.420943	SLC26A7	0.69248	1.61407	1.55875	2.10226
NM_001282445	1.77271	6.10681	0.0113186	EHD1	4.22587	5.44726	7.23607	5.95561
NM_001282597	1.07471	2.07569	0.224198	CTNNA2	1.98241	0.627179	1.0343	3.26696
NM_001282749	0.638263	8.22807	0.289706	TLE4	7.81126	7.93304	8.60621	8.41037
NM_001282762	1.8665	6.72527	0.00362855	CDV3	5.83559	5.09388	6.98187	7.68923
NM_001282868	0.938692	3.87938	0.292982	RHD	1.98241	3.98709	5.03561	2.32331
NM_001282979	0.995389	6.99558	0.105375	TLE3	6.16913	6.62084	7.7004	7.03957
NM_001283050	2.7898	4.5901	0.000839566	ICOSLG	1.12206	3.31913	5.97191	4.39244
NM_001284352	0.845429	2.04216	0.311481	KIAA1324	2.11277	0.627179	1.38365	3.00476
NM_001284357	2.31641	7.08343	0.0003712	LRRC49	5.85435	5.04501	7.50656	8.08073
NM_001286055	1.1538	7.39659	0.0593843	CNN3	6.84933	6.5511	7.54174	8.12365
NM_001286210	0.785187	7.01759	0.188967	STX6	6.41638	6.71106	7.49852	7.19815
NM_001286401	2.02807	6.16238	0.00160643	TMEM217	4.27543	5.21295	7.07848	6.569
NM_001286556	1.14295	7.16855	0.0612199	EVA1C	6.14458	6.7636	7.50745	7.74288
NM_001286761	1.13747	2.7856	0.136224	KIAA0226L	0.923199	2.73619	3.22392	3.24007
NM_001286817	2.62973	7.3217	5.98922e-05	TNFAIP8	5.00737	5.83277	7.89458	8.29346
NM_001286818	0.728673	2.31136	0.390134	KLF5	2.51765	0.794202	1.50271	3.26696
NM_001287012	0.760402	4.02066	0.226673	GLIPR2	3.42909	3.71245	4.68533	3.86819
NM_001287053	1.11273	1.77205	0.130263	C5orf67	0.850317	1.26161	2.2454	2.10226
NM_001287426	2.46321	6.6487	0.000169095	UPP1	5.18459	4.66852	6.91098	7.78419
NM_001287592	0.903068	1.17628	0.246609	SLC50A1	0.606575	0.535809	1.50271	1.42981
NM_001288706	2.50189	3.62261	0.000841579	IL1R1	2.36904	1.26161	3.65512	4.9186
NM_001288724	3.31755	4.5855	8.54317e-07	NFKB2	1.59328	2.53853	5.60694	5.2837
NM_001288963	1.04815	4.30121	0.0926024	TRIP10	3.27054	3.99569	4.9439	4.4639
NM_001289750	0.741804	5.92095	0.223453	DLD	5.82849	5.08181	5.83679	6.56359
NM_001290143	1.69544	5.49831	0.0199678	ADGRG1	3.42909	4.99013	6.66034	5.18846
NM_001291324	0.757384	3.47128	0.282477	BAHCC1	2.17378	3.55846	4.03684	3.46573
NM_001292016	1.06951	3.93891	0.139997	TNIP2	2.3949	3.84206	4.85158	3.59867
NM_001292035	1.59489	8.39653	0.0136573	TAB2	7.53281	7.23138	8.40501	9.39744
NM_001293085	0.695694	6.29235	0.305753	BPGM	6.25986	5.4315	5.64303	7.17172
NM_001293180	0.618385	6.51016	0.297987	PRSS23	5.94683	6.35789	6.70758	6.85917
NM_001294282	1.11143	3.68366	0.09149	MYBL1	3.32535	2.65167	3.70563	4.47548
NM_001297649	0.820623	5.36897	0.167502	CD81	4.70035	5.06965	6.0126	5.34176
NM_001300	0.64326	6.04432	0.270363	KLF6	5.75802	5.6101	6.15801	6.48274
NM_001300787	0.942311	2.64767	0.290247	BEST1	2.77558	0.87098	1.61269	3.77761
NM_001300881	1.68138	1.5591	0.0250073	PEX11G	0.51523	0.438258	1.8998	2.37366
NM_001301065	0.645735	3.46562	0.356892	TREH	2.17378	3.64845	3.82469	3.6404
NM_001301668	0.698422	5.94195	0.23092	AZIN1	5.72273	5.35337	6.07157	6.4062
NM_001302753	0.820159	3.49006	0.260907	CD40	3.52587	2.25318	3.09721	4.34276
NM_001303133	0.797623	2.73748	0.287709	TEX29	1.63727	2.67326	3.50632	2.32331
NM_001303235	1.45861	3.79187	0.0212126	ISG20	2.75576	3.01523	4.14147	4.53199
NM_001303420	0.932142	2.04873	0.198354	COLGALT2	1.59328	1.31755	2.65831	2.04127
NM_001303451	0.841704	3.4013	0.20648	KLHL36	2.541	3.19023	4.04667	3.34474
NM_001303525	0.621989	7.77844	0.305618	TUBB6	7.17072	7.65565	8.17674	7.92273
NM_001303619	1.2606	1.43128	0.0996723	CD226	0.200335	0.943878	1.8998	1.8411
NM_001306070	0.868974	10.0529	0.167861	MBNL2	9.5785	9.52923	9.93851	10.7852
NM_001306147	0.95515	9.64997	0.120126	2011-09-01	9.26773	8.89813	9.96791	10.1274
NM_001306210	0.840622	6.61917	0.171091	TGFBR1	6.38124	5.8471	6.61646	7.26969
NM_001307936	1.29597	10.4682	0.145716	SLC38A2	10.3202	8.4988	8.92712	11.7898
NM_001307952	1.40554	3.25208	0.0313778	HAPLN3	2.56397	2.16445	3.95568	3.57735
NM_001308143	0.787015	5.48149	0.224718	JADE2	4.21865	5.54715	6.12591	5.42171
NM_001308185	0.917294	7.9969	0.310044	CCNL1	8.18871	5.96124	6.40154	9.1905
NM_001308445	0.764245	7.1049	0.231531	NAA50	6.95956	6.31559	6.84068	7.85899
NM_001312910	0.606176	4.58539	0.446756	FAM111A	4.87585	3.14457	3.43326	5.56942
NM_001313903	0.663773	7.77558	0.286048	NFE2L2	7.6224	7.15091	7.65533	8.39141
NM_001321	1.0753	3.11641	0.107752	CSRP2	2.81442	2.03696	3.3404	3.73972
NM_001349	0.628056	5.99873	0.297707	DARS	5.82612	5.45039	5.84244	6.6142
NM_001356	0.622911	6.65991	0.337776	DDX3X	6.60679	5.95022	6.20705	7.4225
NM_001357	0.744181	8.11823	0.260718	DHX9	8.02554	7.27618	7.75314	8.90831
NM_001389	0.716178	1.71174	0.364317	DSCAM	1.63727	0.794202	1.32023	2.46937
NM_001400	0.976229	2.93484	0.155379	S1PR1	2.58658	2.10211	2.87244	3.70081
NM_001402	0.914268	6.20609	0.212589	EEF1A1	6.21339	4.82627	5.4857	7.21551
NM_001412	0.851388	4.76143	0.181574	EIF1AX	4.60388	3.85156	4.48299	5.57481
NM_001425	1.71488	3.31061	0.0105391	EMP3	2.51765	1.85992	3.58938	4.22428
NM_001428	0.877917	5.94046	0.131322	ENO1	5.22839	5.61569	6.24384	6.37873
NM_001433	1.03579	6.17053	0.086722	ERN1	5.19567	5.85184	6.70603	6.477
NM_001439	1.47892	7.07003	0.0324525	EXTL2	6.47664	5.73088	6.66991	8.20237
NM_001442	1.00994	4.67173	0.361565	FABP4	4.98201	1.37139	2.2454	6.00436
NM_001486	2.41667	1.73052	0.00219934	GCKR	-0.203055	0.333629	2.27915	2.68409
NM_001497	2.30724	6.65866	0.00022897	B4GALT1	4.85271	5.29187	7.22529	7.54838
NM_001510	1.48865	2.83745	0.0324865	GRID2	1.91253	1.93336	2.89439	3.79619
NM_001511	4.76316	3.68868	1.0414e-06	CXCL1	-2.21908	0.713106	5.24223	3.53373
NM_001522	2.1746	1.96496	0.0158374	GUCY2F	0.923199	0.0984251	1.25388	3.46573
NM_001539	1.34863	6.57113	0.0301443	DNAJA1	5.80217	5.68909	6.58981	7.46956
NM_001561	5.95266	2.22944	3.3531e-09	TNFRSF9	-3.04265	-2.20081	2.85016	3.59867
NM_001570	2.46948	6.59301	0.00091969	IRAK2	3.58322	5.5588	7.58202	7.08372
NM_001609	0.797665	3.96876	0.197831	ACADSB	3.74274	3.23449	4.15061	4.45224
NM_001627	2.74159	11.4182	0.00393937	ALCAM	10.1968	7.96896	10.2988	13.0129
NM_001665	0.808924	4.07694	0.181561	RHOG	3.49034	3.72284	4.36222	4.47548
NM_001677	2.26751	5.80889	0.000428565	ATP1B1	4.60941	3.84206	6.03005	6.92184
NM_001690	0.987915	6.55595	0.146566	ATP6V1A	6.38447	5.41877	6.11894	7.50104
NM_001706	1.94252	4.70399	0.00249096	BCL6	3.32535	3.54681	4.77085	5.81238
NM_001753	1.60852	9.92999	0.0164016	CAV1	9.25632	8.46049	9.93471	10.9369
NM_001754	0.989985	7.7458	0.173869	RUNX1	6.4211	7.65497	8.75792	7.1025
NM_001777	2.11075	6.7743	0.00626039	CD47	5.859	4.61929	6.19384	8.14827
NM_001779	1.64041	5.94556	0.00726096	CD58	5.09279	4.69516	6.11894	6.87891
NM_001781	5.54028	5.47233	9.59217e-10	CD69	1.18269	0.627179	4.87935	7.1999
NM_001795	1.0653	9.25653	0.0940932	CDH5	8.78727	8.4488	9.19059	10.0654
NM_001797	1.17964	8.07792	0.0843287	CDH11	6.79696	7.77907	9.03353	7.81526
NM_001799	0.897006	5.32456	0.122632	CDK7	4.54159	5.02834	5.75819	5.64311
NM_001845	1.04055	10.1991	0.0923143	COL4A1	9.29631	9.8288	10.6609	10.5934
NM_001846	0.734376	9.99995	0.239477	COL4A2	9.26555	9.84867	10.5381	10.0647
NM_001860	2.07929	3.8446	0.0019498	SLC31A2	2.56397	2.38991	3.98666	4.9686
NM_001861	0.907469	3.76435	0.151885	COX4I1	3.50228	2.91	3.99683	4.27814
NM_001914	2.16502	4.33583	0.00186629	CYB5A	1.87628	3.47484	5.16761	4.9186
NM_001938	0.600601	4.90655	0.381843	DR1	5.12017	3.69143	4.43139	5.66854
NM_001945	1.5784	6.14807	0.00902871	HBEGF	5.36547	4.90597	6.78597	6.67569
NM_001951	1.09786	4.00776	0.0798918	E2F5	2.96008	3.65932	4.5877	4.2913
NM_001987	0.661147	9.90589	0.297641	ETV6	9.09735	9.87439	10.453	9.88973
NM_002015	0.708669	9.28542	0.267192	FOXO1	8.52248	9.17881	9.93967	9.14457
NM_002025	0.611059	2.89408	0.352217	AFF2	2.36904	2.67326	3.30807	2.93941
NM_002032	1.13416	6.67443	0.178076	FTH1	6.72617	4.47917	5.72796	7.83561
NM_002053	1.40423	2.4643	0.0859054	GBP1	2.1436	0.794202	2.02443	3.61969
NM_002084	2.47971	4.37587	0.000106617	GPX3	2.4203	2.87314	5.3573	4.88428
NM_002114	1.61326	9.38983	0.0117922	HIVEP1	8.47327	8.2565	9.51947	10.3321
NM_002116	1.63673	2.83337	0.018964	HLA-A	2.04906	1.52184	3.01946	3.77761
NM_002184	0.835935	8.40225	0.250452	IL6ST	8.49173	6.97837	7.90745	9.2938
NM_002185	3.3308	3.34448	3.12531e-05	IL7R	0.69248	1.14278	3.17097	4.87557
NM_002197	0.983303	7.21881	0.100744	ACO1	6.81623	6.44993	7.64161	7.61399
NM_002198	4.2796	5.76734	1.22995e-09	IRF1	2.541	2.30944	6.05218	7.15562
NM_002210	2.40652	9.97921	0.000648102	ITGAV	8.67601	7.85722	9.98719	11.2186
NM_002214	1.96816	7.92418	0.00645922	ITGB8	7.03241	6.06905	7.61873	9.17595
NM_002227	1.07373	9.39695	0.0852246	JAK1	9.00095	8.4767	9.61404	10.0288
NM_002271	0.769331	5.53063	0.182038	IPO5	5.05275	5.13337	5.79657	5.92639
NM_002285	2.47657	4.92829	0.000174228	AFF3	2.71529	3.60416	5.18106	6.0859
NM_002293	1.14181	8.78498	0.0662136	LAMC1	7.82737	8.33568	9.43848	9.02267
NM_002305	1.17186	5.77035	0.050357	LGALS1	4.61492	5.41236	6.33089	6.14144
NM_002317	2.22846	5.28914	0.00206721	LOX	4.02528	3.52322	4.75295	6.69066
NM_002318	1.37826	7.7512	0.0376322	LOXL2	6.36171	7.29546	8.68229	7.72239
NM_002338	1.19356	1.75149	0.139243	LSAMP	1.12206	0.943878	1.32023	2.79908
NM_002356	1.03058	4.84721	0.0764518	MARCKS	4.15198	4.32396	5.25076	5.29027
NM_002395	0.609788	7.62998	0.358693	ME1	7.6367	6.84199	7.13371	8.40282
NM_002419	1.00381	4.41354	0.106966	MAP3K11	3.42909	4.12671	5.08415	4.49835
NM_002425	2.94303	3.73184	4.26063e-05	MMP10	2.01612	1.14278	4.04667	4.97676
NM_002444	1.23862	8.96053	0.0434908	MSN	8.04149	8.36501	9.37771	9.52056
NM_002448	2.43669	2.47475	0.00521407	MSX1	1.40254	-0.0353182	2.10191	3.93678
NM_002473	0.610541	9.42924	0.332275	MYH9	8.69825	9.40039	9.94362	9.41182
NM_002546	2.66614	2.69754	0.000299663	TNFRSF11B	0.850317	0.87098	3.09721	3.85053
NM_002568	0.604131	6.46363	0.314349	PABPC1	6.33858	5.88461	6.49785	6.93657
NM_002575	2.97964	2.15427	0.000828069	SERPINB2	0.51523	-0.532296	1.94255	3.68095
NM_002607	0.693128	4.79916	0.315022	PDGFA	3.75277	4.84542	5.65272	4.154
NM_002608	0.732658	7.52197	0.248159	PDGFB	6.89534	7.29371	8.27671	7.21205
NM_002622	0.716406	6.65548	0.231128	PFDN1	6.3319	6.16936	6.71992	7.18235
NM_002640	1.16062	5.28108	0.0568765	SERPINB8	4.8941	4.20295	5.37691	6.04765
NM_002698	1.06943	2.89411	0.148077	POU2F2	2.1436	2.30944	3.85857	2.32331
NM_002729	0.890575	6.42528	0.227048	HHEX	6.49319	4.93308	5.79657	7.39381
NM_002748	1.37836	6.56188	0.0216547	MAPK6	5.56939	5.8471	6.99208	7.18764
NM_002818	1.39651	1.94423	0.0542545	PSME2	0.923199	1.20342	2.31213	2.602
NM_002826	0.9595	6.08462	0.162313	QSOX1	4.8941	5.95904	7.0173	5.61722
NM_002835	0.773048	8.59798	0.204187	PTPN12	8.13651	8.18359	8.69758	9.13594
NM_002844	1.97151	12.1075	0.00310981	PTPRK	11.0118	10.5716	12.1548	13.2147
NM_002872	0.74637	3.36589	0.298231	RAC2	2.17378	3.41199	4.06614	3.09756
NM_002883	1.40685	6.59034	0.0374482	RANGAP1	5.05275	6.17505	7.57524	6.47123
NM_002894	1.00666	4.7541	0.110719	RBBP8	4.28928	4.03793	4.47573	5.64823
NM_002908	1.78862	5.74769	0.00462649	REL	4.92548	4.17293	5.87591	6.76328
NM_002941	1.06451	8.53879	0.105082	ROBO1	8.01828	7.79517	8.20719	9.47444
NM_002970	1.48117	6.54743	0.0562549	SAT1	6.21339	4.63038	5.86484	7.76898
NM_002982	3.60931	2.78503	9.95815e-06	CCL2	-1.0144	0.713106	3.86969	3.46573
NM_002987	5.09538	0.200072	0.000121281	CCL17	-5.16151	-3.02646	1.0343	1.11162
NM_002996	5.33317	3.00449	2.01825e-09	CX3CL1	-2.21908	-0.745004	4.31419	3.53373
NM_002999	3.76831	7.41764	2.55156e-08	SDC4	4.72094	4.3577	7.99954	8.57945
NM_003026	0.610828	1.87597	0.439541	SH3GL2	1.35064	1.65807	1.25388	2.68409
NM_003028	1.95045	8.62281	0.0055057	SHB	6.52134	7.85958	9.66539	8.78293
NM_003045	0.617381	6.91867	0.334605	SLC7A1	5.89568	7.03578	7.43818	6.89623
NM_003061	1.24744	1.02593	0.108151	SLIT1	0.200335	0.220815	1.18434	1.69035
NM_003080	0.742386	1.89077	0.308688	SMPD2	1.59328	1.20342	2.43699	1.76769
NM_003090	1.93259	5.68888	0.00183794	SNRPA1	4.64217	4.17293	5.90323	6.70548
NM_003124	1.10385	1.82913	0.121822	SPR	0.992576	1.26161	2.34437	2.10226
NM_003131	0.784374	2.58082	0.374269	SRF	2.73567	1.14278	1.25388	3.70081
NM_003137	0.9904	6.95585	0.108851	SRPK1	5.96636	6.69531	7.58539	7.10808
NM_003142	0.650529	4.24447	0.338231	SSB	4.303	3.29147	3.74239	5.04826
NM_003152	2.41736	4.40574	0.000127579	STAT5A	2.65237	2.83532	5.36124	4.92706
NM_003190	1.47451	4.81327	0.0155898	TAPBP	3.52587	4.18802	5.56992	5.13108
NM_003238	2.17287	8.23549	0.00142788	TGFB2	7.05488	6.42786	8.25885	9.41257
NM_003242	0.927384	10.8167	0.143247	TGFBR2	10.4747	10.0544	10.7675	11.5437
NM_003300	1.26371	6.81931	0.082252	TRAF3	5.08089	6.62639	7.84966	6.45378
NM_003331	0.800238	4.27594	0.213324	TYK2	3.35199	4.15769	4.9596	4.13952
NM_003358	0.935975	6.75447	0.122168	UGCG	5.859	6.49459	7.12446	7.16994
NM_003373	0.858202	8.45835	0.153458	VCL	7.98409	7.94807	8.79594	8.85226
NM_003380	0.796206	8.19764	0.269096	VIM	8.19884	7.08193	7.50478	9.13958
NM_003388	0.793982	5.44251	0.306253	CLIP2	3.86802	5.60449	6.45604	4.44047
NM_003407	1.69844	2.32071	0.0573079	ZFP36	1.98241	-0.182739	1.85574	3.59867
NM_003430	0.892438	5.78835	0.149453	ZNF91	5.53783	4.95529	5.56651	6.5931
NM_003440	1.20655	6.2419	0.0467725	ZNF140	5.74802	5.24215	6.47437	6.93657
NM_003443	0.806686	4.71943	0.204519	ZBTB17	3.56056	4.72131	5.26346	4.82219
NM_003485	1.36372	2.05251	0.0763873	GPR68	0.313111	1.74222	2.55189	2.55913
NM_003489	1.0697	8.76892	0.11896	NRIP1	7.68268	8.4813	9.73772	8.35506
NM_003498	1.41963	3.59791	0.0723245	SNN	1.91253	3.20513	4.77677	2.83547
NM_003564	0.875455	5.00439	0.143301	TAGLN2	4.55885	4.42926	5.70642	4.92706
NM_003612	2.08498	1.7695	0.00852564	SEMA7A	-0.367191	0.87098	2.43699	2.46937
NM_003670	1.05397	3.21073	0.153374	BHLHE40	3.18421	1.56869	3.20649	3.98616
NM_003672	1.32631	8.25778	0.0316162	CDC14A	7.55663	7.32986	8.53903	8.97607
NM_003711	1.21409	5.65715	0.0404057	PPAP2A	5.14324	4.67388	5.8978	6.35072
NM_003713	1.7926	7.70582	0.00478481	PPAP2B	6.61094	6.48394	7.86293	8.70027
NM_003722	2.36835	2.26309	0.00472703	TP63	1.12206	0.0984251	1.98407	3.68095
NM_003742	1.93341	3.87767	0.0399519	ABCB11	3.27054	1.52184	2.27915	5.42768
NM_003764	2.41201	4.67292	0.00025403	STX11	2.4203	3.45003	5.15857	5.66854
NM_003773	0.70342	2.4908	0.323796	HYAL2	1.63727	2.41577	2.43699	3.06728
NM_003792	0.660872	2.3355	0.347881	EDF1	1.76172	2.06991	2.82753	2.27114
NM_003816	0.973755	9.31265	0.145269	ADAM9	9.0195	8.40671	8.96033	10.214
NM_003821	3.91572	8.53685	3.77916e-05	RIPK2	6.10596	4.56255	7.47414	10.2504
NM_003828	0.60271	6.13047	0.304477	MTMR1	5.89342	5.69173	6.36665	6.43019
NM_003853	2.35556	0.516038	0.0171941	IL18RAP	-0.367191	-3.02646	1.11127	1.22566
NM_003855	4.94001	7.87937	5.62058e-10	IL18R1	4.38914	3.14457	8.23594	9.25865
NM_003862	1.41697	2.0778	0.0579601	FGF18	1.12206	1.20342	2.97896	1.97758
NM_003870	0.782218	8.34045	0.229153	IQGAP1	8.20342	7.50795	8.08012	9.10181
NM_003878	2.22404	5.77623	0.00667688	GGH	4.96916	2.92808	5.25924	7.16637
NM_003897	0.976537	0.925644	0.22669	IER3	0.417707	0.0984251	1.0343	1.42981
NM_003898	1.04088	8.06222	0.119012	SYNJ2	6.89648	7.84776	8.92079	7.87219
NM_003901	1.20013	6.67884	0.0443518	SGPL1	6.02549	5.88693	7.05432	7.25466
NM_003937	2.44062	4.21699	0.00803215	KYNU	3.21356	1.37139	2.97896	5.82147
NM_003971	0.653199	7.2907	0.321064	SPAG9	7.25255	6.50818	6.83218	8.07218
NM_003994	1.73289	8.57505	0.0395061	KITLG	8.04047	6.49003	7.48774	9.95784
NM_003998	3.44495	10.166	1.04134e-05	NFKB1	7.94361	7.13446	9.93389	11.6586
NM_004034	1.22216	5.54231	0.038798	ANXA7	4.96053	4.63589	5.77011	6.24988
NM_004048	1.33495	3.77681	0.0796736	B2M	3.59442	1.85992	3.53454	4.81309
NM_004079	2.84927	2.72985	0.000234439	CTSS	0.313111	1.07948	2.916	4.04947
NM_004080	0.776298	2.5771	0.359059	DGKB	2.49392	1.70076	1.11127	3.72039
NM_004090	1.15366	4.31021	0.0552834	DUSP3	3.65986	3.58149	4.66633	4.87557
NM_004148	1.97198	5.07277	0.0119797	NINJ1	2.31589	4.47917	6.27553	4.87557
NM_004180	1.97755	10.3977	0.00235308	TANK	9.17868	9.00393	10.578	11.4385
NM_004181	0.770653	4.54111	0.224611	UCHL1	4.41464	3.71245	4.31419	5.2837
NM_004185	0.603568	4.49191	0.324101	WNT2B	3.80192	4.42926	5.00569	4.44047
NM_004289	0.996142	5.78238	0.0840286	NFE2L3	5.11629	5.27784	6.18496	6.20539
NM_004334	0.683916	3.67444	0.376776	BST1	3.87722	2.30944	2.93729	4.58637
NM_004337	0.614606	5.64641	0.411133	OSGIN2	5.86826	4.38413	4.63409	6.59576
NM_004379	0.857279	6.96596	0.158271	CREB1	6.5887	6.35121	6.96382	7.62573
NM_004414	1.19582	5.41051	0.0727945	RCAN1	4.28237	5.01994	4.95438	6.45962
NM_004419	1.09866	5.0017	0.066609	DUSP5	4.63133	4.00424	5.19439	5.66854
NM_004420	1.54411	4.73787	0.00982445	DUSP8	3.75277	3.78368	5.49291	5.10151
NM_004429	1.89272	3.27126	0.0204422	EFNB1	1.05877	2.58486	4.54673	2.68409
NM_004431	0.801349	7.18812	0.25297	EPHA2	5.80217	7.2911	7.99446	6.84585
NM_004464	4.11317	6.13788	0.00192912	FGF5	3.85876	0.0984251	3.43326	8.01385
NM_004537	0.894658	8.37025	0.145898	NAP1L1	7.9518	7.75078	8.41832	9.01872
NM_004556	1.98313	3.97217	0.00223738	NFKBIE	2.56397	2.75657	4.96479	4.22428
NM_004570	1.13876	2.21247	0.161887	PIK3C2G	0.313111	2.13362	2.99936	2.10226
NM_004660	0.876415	5.79335	0.215509	DDX3Y	5.76299	4.5912	5.05035	6.79364
NM_004670	1.06223	7.16538	0.0790682	PAPSS2	6.53449	6.54379	7.30425	7.8479
NM_004686	1.13948	4.97117	0.0778726	MTMR7	4.68471	3.76368	4.78853	5.8836
NM_004717	0.642857	5.71026	0.297001	DGKI	4.98201	5.64057	6.3842	5.44544
NM_004728	0.797245	5.34348	0.172139	DDX21	4.71068	5.04914	5.44911	5.89226
NM_004746	0.845844	5.53279	0.150109	DLGAP1	4.75128	5.29187	5.95112	5.83052
NM_004753	0.980368	4.66649	0.158828	DHRS3	3.44155	4.5274	5.61357	4.154
NM_004762	0.912006	7.5645	0.130226	CYTH1	6.7799	7.25574	7.94341	7.95512
NM_004770	1.035	1.77556	0.214452	KCNB2	1.72141	0.220815	1.38365	2.72345
NM_004776	1.28723	7.55869	0.0427853	B4GALT5	6.20794	7.18232	8.24397	7.85567
NM_004787	0.826507	8.9179	0.171723	SLIT2	8.46414	8.42791	9.22482	9.31892
NM_004822	0.693294	1.54527	0.386693	NTN1	1.18269	0.943878	2.17544	1.11162
NM_004850	0.688113	8.21747	0.278568	ROCK2	8.00942	7.63171	7.97529	8.91629
NM_004906	0.968761	6.75383	0.134935	WTAP	6.52866	5.7488	6.53325	7.59555
NM_004998	0.841814	9.00622	0.170946	MYO1E	8.6051	8.43977	9.07915	9.60629
NM_005038	1.11853	4.37719	0.0986406	PPID	4.10576	3.19023	4.06614	5.34176
NM_005040	1.57275	8.26787	0.0209105	PRCP	7.68661	6.70583	8.21102	9.29258
NM_005045	0.905172	4.05423	0.169209	RELN	2.85224	3.97844	4.67269	4.1249
NM_005092	1.87559	6.73832	0.00811481	TNFSF18	5.41685	5.61569	6.23096	8.03159
NM_005099	0.915806	2.80834	0.254649	ADAMTS4	0.923199	2.92808	3.53454	2.64363
NM_005100	0.804411	7.56593	0.204776	AKAP12	6.60956	7.47682	8.21865	7.52072
NM_005110	2.56271	5.33906	5.25314e-05	GFPT2	3.01113	3.95218	6.13515	6.10092
NM_005118	1.65146	7.04649	0.0488171	TNFSF15	4.06608	6.79227	8.1399	6.88976
NM_005178	2.65052	4.60623	3.79355e-05	BCL3	2.60885	2.87314	5.70642	4.99296
NM_005187	1.32544	1.07031	0.101603	CBFA2T3	0.606575	-0.346956	1.25388	1.76769
NM_005204	2.59885	4.63854	4.84228e-05	MAP3K8	3.12365	2.46614	5.22068	5.61199
NM_005215	0.824724	2.62053	0.282708	DCC	2.65237	1.37139	2.13914	3.51142
NM_005242	1.6444	4.60134	0.0242277	F2RL1	2.28857	4.21772	5.54239	4.73821
NM_005253	1.23524	6.96122	0.0417936	FOSL2	6.41005	5.99164	7.23929	7.63608
NM_005257	1.98813	6.7096	0.00196101	GATA6	5.55799	5.22397	6.84491	7.78302
NM_005261	2.07196	1.24982	0.012365	GEM	0.200335	-0.532296	1.44441	2.32331
NM_005418	1.00065	5.47119	0.0839866	ST5	4.8941	4.87368	6.0126	5.74225
NM_005429	1.13891	10.2529	0.208676	VEGFC	10.3835	7.56033	9.29119	11.4152
NM_005502	0.886457	6.32982	0.148293	ABCA1	6.1254	5.4315	6.41489	6.94907
NM_005516	0.837183	4.9604	0.162466	HLA-E	4.70035	4.22505	4.93863	5.62244
NM_005534	2.18582	6.17389	0.00125054	IFNGR2	4.02528	5.16039	7.27423	6.35386
NM_005562	2.94687	4.61245	1.78986e-05	LAMC2	1.83909	2.94593	5.74013	5.05599
NM_005602	1.52389	5.44524	0.0102094	CLDN11	4.2041	4.73164	6.0907	5.9348
NM_005620	0.878718	4.67445	0.206023	S100A11	4.71068	3.30537	4.32231	5.53665
NM_005640	1.73532	4.5333	0.00915276	TAF4B	2.65237	3.9164	5.43046	4.80394
NM_005655	0.765243	3.23709	0.247334	KLF10	3.16931	2.28158	3.44817	3.66082
NM_005708	1.45311	2.51766	0.069566	GPC6	2.04906	1.07948	1.94255	3.73972
NM_005715	0.656701	4.28524	0.276066	UST	3.63838	4.14229	4.63409	4.49835
NM_005717	0.627124	4.63433	0.4112	ARPC5	4.88043	3.27743	3.69317	5.57481
NM_005721	0.963082	8.2801	0.139533	ACTR3	8.04557	7.29893	8.11733	9.08868
NM_005746	1.27218	8.00871	0.049236	NAMPT	7.29436	7.17855	7.84191	8.96483
NM_005748	0.626166	6.59433	0.288507	YAF2	6.22965	6.26315	6.78744	6.95322
NM_005754	0.601092	5.86013	0.297564	G3BP1	5.62507	5.42196	5.92204	6.30929
NM_005755	6.02175	1.00448	1.43212e-07	EBI3	-3.04265	-5.16151	1.94255	2.04127
NM_005801	0.629926	4.42411	0.413467	EIF1	4.68994	2.99821	3.54845	5.34807
NM_005860	2.21542	3.77873	0.00465571	FSTL3	1.12206	2.91	4.99049	3.70081
NM_005902	1.53789	9.71152	0.0700911	SMAD3	7.2935	9.45538	10.9682	8.93789
NM_005921	1.50122	7.56726	0.0141166	MAP3K1	6.79939	6.43893	7.94407	8.29754
NM_005933	0.673395	7.01951	0.268999	KMT2A	6.85516	6.39574	6.99462	7.58089
NM_005953	2.93484	3.6569	5.70346e-05	MT2A	1.35064	1.78253	3.77824	5.00099
NM_006080	1.67299	5.38139	0.00443201	SEMA3A	4.21865	4.41009	5.95895	6.02025
NM_006154	0.706026	7.81971	0.262294	NEDD4	7.64884	7.15763	7.64566	8.49241
NM_006169	2.07936	7.61077	0.018201	NNMT	6.81024	5.23854	6.31267	9.11482
NM_006187	0.931028	2.37952	0.175628	OAS3	1.63727	1.96873	2.82753	2.64363
NM_006214	0.738774	2.15698	0.30061	PHYH	2.01612	1.31755	2.27915	2.602
NM_006254	1.02188	3.99622	0.128203	PRKCD	2.75576	3.82286	4.76491	3.91994
NM_006277	0.916224	7.92151	0.137223	ITSN2	7.57866	7.17761	7.99954	8.56259
NM_006290	5.91313	8.11489	1.36245e-10	TNFAIP3	3.63838	2.5148	7.79603	9.76679
NM_006291	5.00224	5.98239	1.70473e-11	TNFAIP2	1.50106	2.28158	7.32661	6.40922
NM_006303	0.691449	5.30914	0.365099	AIMP2	5.50556	3.94332	4.26451	6.30605
NM_006339	0.620958	1.58121	0.436978	HMG20B	1.40254	0.943878	1.18434	2.27114
NM_006368	0.883555	2.99273	0.196036	CREB3	2.17378	2.73619	2.87244	3.73972
NM_006379	2.70247	1.79046	0.00180666	SEMA3C	0.313111	-0.532296	1.71487	3.21267
NM_006500	0.738453	6.44723	0.283854	MCAM	5.13942	6.57425	7.20897	6.12317
NM_006505	0.847979	5.92004	0.167361	PVR	5.01989	5.75134	6.62469	5.82147
NM_006509	3.80073	5.63654	2.8717e-07	RELB	1.80092	3.30537	6.91367	6.02813
NM_006520	0.929949	2.93644	0.20581	DYNLT3	2.83345	1.78253	2.57924	3.83264
NM_006526	0.822287	4.13579	0.23983	ZNF217	4.06608	3.12902	3.53454	5.07132
NM_006583	0.8709	1.51933	0.241738	RRH	0.992576	0.943878	1.61269	2.04127
NM_006598	2.34405	5.95221	0.0012794	SLC12A7	3.13903	4.99871	7.03839	6.23633
NM_006606	0.883714	2.00276	0.218781	RBBP9	1.63727	1.26161	2.21085	2.46937
NM_006635	0.623279	3.26839	0.341432	ZNF460	2.58658	3.15995	3.75444	3.24007
NM_006645	1.70954	3.97479	0.0327791	STARD10	1.59328	3.53506	5.1631	3.5557
NM_006713	1.11552	4.78105	0.0597607	SUB1	4.35002	3.84206	5.11718	5.34176
NM_006734	4.3915	10.6321	6.19958e-08	HIVEP2	7.36474	6.95431	10.3795	12.2075
NM_006806	0.988706	6.49498	0.165034	BTG3	6.41638	5.15656	5.93533	7.48538
NM_006825	0.741552	4.02129	0.222202	CKAP4	3.61657	3.58149	4.123	4.53199
NM_006832	0.874393	7.67928	0.168439	FERMT2	7.37614	6.94657	7.47505	8.46292
NM_006834	1.14007	4.74159	0.185829	RAB32	4.8053	2.5148	3.61604	5.95561
NM_006851	0.691716	5.8546	0.323701	GLIPR1	5.9512	4.7419	5.10782	6.76564
NM_006870	1.1418	6.78829	0.0591593	DSTN	6.171	6.04232	6.94817	7.49962
NM_006887	0.720355	3.04573	0.27629	ZFP36L2	2.60885	2.65167	3.05886	3.59867
NM_006910	0.832856	6.75882	0.240277	RBBP6	6.75391	5.58468	6.11894	7.70283
NM_006981	3.68624	3.48574	1.62108e-06	NR4A3	0.850317	0.627179	3.6806	4.9101
NM_006990	0.673329	7.26397	0.273802	WASF2	6.48268	7.20289	7.75539	7.33468
NM_006992	0.630601	1.38537	0.410357	LRRC23	1.2968	0.535809	1.32023	1.8411
NM_007036	0.601316	8.79507	0.484527	ESM1	9.20677	6.84793	7.59296	9.77851
NM_007043	0.836758	5.79817	0.282668	KRR1	5.91814	4.29638	4.70409	6.87236
NM_007085	0.970965	8.61707	0.112264	FSTL1	8.14748	7.94863	8.80501	9.21142
NM_007097	0.700704	3.64829	0.31806	CLTB	2.67365	3.63751	4.39337	3.24007
NM_007146	0.680679	6.03297	0.300908	VEZF1	6.0703	5.06557	5.61357	6.8143
NM_007203	0.671155	2.54374	0.332982	PALM2-AKAP2	2.36904	1.89711	2.40677	3.15626
NM_007207	1.12382	4.21084	0.0627148	DUSP10	3.63838	3.43746	4.5877	4.73821
NM_007210	0.883659	4.90024	0.273022	GALNT6	3.04418	5.06148	5.94325	3.91994
NM_007269	0.7029	7.11786	0.277142	STXBP3	7.04675	6.30871	6.7845	7.87109
NM_007285	1.08174	4.68581	0.0722761	GABARAPL2	4.26845	3.78368	4.95438	5.2837
NM_012068	1.28506	1.82755	0.0885323	ATF5	0.606575	1.31755	2.52401	1.97758
NM_012081	1.63042	7.83348	0.0175202	ELL2	7.23923	6.16746	7.77917	8.87865
NM_012082	1.0246	11.4486	0.197103	ZFPM2	11.4381	9.82971	10.5154	12.5586
NM_012106	1.0539	4.13871	0.106204	ARL2BP	3.89545	3.01523	4.08534	4.94382
NM_012110	0.815505	7.94864	0.179112	CHIC2	7.61967	7.33411	8.11149	8.46582
NM_012118	2.64197	6.76577	4.38838e-05	NOCT	4.45206	5.26011	7.59966	7.50528
NM_012204	0.881768	3.87119	0.159914	GTF3C4	3.62752	3.03204	4.07577	4.39244
NM_012293	0.641934	7.27361	0.333145	PXDN	6.18032	7.40036	7.92887	7.05508
NM_012294	1.70995	9.32861	0.00740111	RAPGEF5	8.23373	8.23488	9.50417	10.2811
NM_012329	2.28106	4.0291	0.000524108	MMD	2.11277	2.79648	4.48299	5.01692
NM_012342	2.32946	3.38627	0.00994108	BAMBI	2.541	0.438258	2.63243	4.90155
NM_012388	0.771351	5.07368	0.228119	BLOC1S6	4.98627	4.1805	4.69786	5.88794
NM_012465	1.17613	1.59415	0.132146	TLL2	0.606575	1.01327	2.37591	1.42981
NM_012478	0.73987	3.16978	0.262984	WBP2	3.04418	2.36358	3.20649	3.72039
NM_013248	0.82822	1.87073	0.256282	NXT1	1.35064	1.37139	1.98407	2.37366
NM_013385	3.49861	2.20354	1.76708e-05	CYTH4	-0.765001	-0.0353182	2.82753	3.36976
NM_013437	1.33877	7.31804	0.0281313	LRP12	6.55039	6.44679	7.54695	8.08073
NM_013943	0.855224	7.75824	0.158512	CLIC4	7.00958	7.48676	8.16663	8.07788
NM_013962	0.90976	9.90242	0.138355	NRG1	9.42384	9.32861	10.0499	10.4902
NM_014038	0.685858	6.807	0.254563	BZW2	6.56185	6.27025	6.8179	7.35205
NM_014141	1.17613	2.72124	0.147768	CNTNAP2	2.31589	1.70076	1.76337	3.93678
NM_014143	1.54402	7.05406	0.0606343	CD274	6.68485	5.05327	6.02757	8.37373
NM_014263	0.69625	6.47724	0.249152	YME1L1	6.28946	5.85184	6.48706	7.02979
NM_014306	0.671535	5.2243	0.249891	RTCB	5.07691	4.57408	5.40775	5.62244
NM_014313	0.680672	4.8501	0.246025	TMEM50A	4.54737	4.38413	4.86831	5.38536
NM_014314	1.18509	7.11281	0.047338	DDX58	6.33023	6.47012	7.61378	7.5593
NM_014326	0.721436	5.33082	0.26724	DAPK2	4.56455	5.20185	6.17603	4.76675
NM_014330	0.928999	4.11645	0.188396	PPP1R15A	4.10576	2.75657	3.77824	5.00099
NM_014331	0.773533	11.0268	0.362569	SLC7A11	11.2597	9.2957	9.71208	12.1122
NM_014361	0.864478	2.52026	0.317468	CNTN5	2.3949	1.56869	1.18434	3.68095
NM_014372	0.773306	5.58331	0.180864	RNF11	4.98627	5.28487	5.95634	5.87489
NM_014398	1.53877	2.65688	0.0414957	LAMP3	2.20335	0.943878	2.70872	3.6404
NM_014452	0.868024	7.48578	0.170669	TNFRSF21	6.50363	7.3476	8.17001	7.44916
NM_014470	3.65514	4.69757	3.68748e-07	RND1	2.4203	1.26161	5.14491	5.95561
NM_014584	0.695221	5.83983	0.233353	ERO1A	5.54362	5.35002	5.85927	6.38488
NM_014602	0.832132	5.88517	0.172925	PIK3R4	5.72017	5.01572	5.79948	6.58244
NM_014608	0.80953	6.87916	0.190907	CYFIP1	6.15974	6.63467	7.56843	6.77503
NM_014624	1.04359	5.3673	0.101217	S100A6	5.15085	4.21035	5.22934	6.20886
NM_014689	1.53237	8.81681	0.0143904	DOCK10	7.51081	8.1348	9.38814	9.38905
NM_014728	0.629158	3.52441	0.389655	FRMPD4	3.6915	2.36358	3.01946	4.31726
NM_014755	1.17682	4.82522	0.0656028	SERTAD2	4.38269	3.81317	4.60111	5.7754
NM_014779	0.786168	8.82351	0.258805	TSC22D2	8.75488	7.86604	8.23432	9.72498
NM_014795	0.662845	8.32254	0.285744	ZEB2	8.2252	7.61786	8.34801	8.84224
NM_014830	0.927176	1.8416	0.269069	ZBTB39	1.98241	-0.182739	1.94255	2.42231
NM_014832	0.76567	9.35402	0.321966	TBC1D4	9.48999	7.96896	8.43947	10.3459
NM_014851	0.760346	3.30507	0.226632	KLHL21	2.99431	2.71552	3.64221	3.59867
NM_014855	1.02266	5.59229	0.0778933	AP5Z1	5.00318	4.9815	5.85927	6.1559
NM_014858	1.56864	2.35118	0.0410904	TMCC2	0.606575	1.82174	3.27499	2.37366
NM_014872	0.896577	4.78291	0.124856	ZBTB5	4.29615	4.23235	5.03561	5.2771
NM_014878	0.655495	6.63895	0.287181	KIAA0020	6.44141	6.08525	6.45973	7.28457
NM_014943	0.738759	6.7506	0.248614	ZHX2	5.66811	6.78608	7.32459	6.76328
NM_014957	0.914875	6.86672	0.133937	DENND3	6.02756	6.59136	7.4796	6.97987
NM_014971	0.623254	1.40582	0.423722	EFR3B	0.992576	0.943878	1.85574	1.22566
NM_015001	1.19472	5.63344	0.0414143	SPEN	4.74627	5.06965	5.93003	6.27327
NM_015033	0.685384	6.78206	0.269668	FNBP1	6.69269	6.02982	6.681	7.3999
NM_015039	2.39855	2.34893	0.00157671	NMNAT2	0.923199	0.535809	2.55189	3.5557
NM_015054	0.823529	5.50098	0.1625	UHRF1BP1L	5.27786	4.73164	5.6719	6.0163
NM_015114	0.73668	6.52227	0.225022	ANKLE2	5.81897	6.34449	7.07848	6.55816
NM_015130	0.864534	8.22807	0.160657	TBC1D9	7.88495	7.56106	8.29899	8.84336
NM_015172	0.698296	8.03097	0.250859	PRRC2C	7.75434	7.51545	8.10445	8.53934
NM_015191	1.82566	8.30334	0.0173321	SIK2	7.59757	6.40383	7.69338	9.60695
NM_015247	2.1167	6.88204	0.00169112	CYLD	5.79004	5.05738	6.88656	8.05589
NM_015258	0.666264	5.82728	0.258208	FKBP15	5.6813	5.18691	5.83679	6.36012
NM_015266	1.00172	6.46032	0.0921167	SLC9A8	6.03168	5.69702	6.81214	6.93657
NM_015306	1.15457	8.02619	0.086183	USP24	7.62855	6.97185	7.68789	9.00531
NM_015368	1.31749	5.961	0.0239067	PANX1	5.15085	5.16421	6.43748	6.51114
NM_015420	0.694693	5.21776	0.272631	DCAF13	5.13559	4.4419	4.83466	5.99233
NM_015469	0.633687	4.53576	0.437279	NIPSNAP3A	4.87125	2.85435	3.41819	5.52556
NM_015483	0.622752	6.19299	0.306595	KBTBD2	6.06024	5.59885	6.05948	6.79133
NM_015492	0.802748	3.52603	0.212701	C15orf39	2.75576	3.30537	3.99683	3.70081
NM_015500	0.778182	6.75966	0.19227	C2CD2	6.27038	6.36288	7.28153	6.88109
NM_015550	0.638602	8.27262	0.309757	OSBPL3	7.41535	8.28966	8.70108	8.39522
NM_015551	1.18418	4.7395	0.0444482	SUSD5	3.94879	4.10304	5.28023	5.13838
NM_015585	0.949239	1.14852	0.236856	CFAP61	0.923199	-0.0353182	1.32023	1.60862
NM_015589	1.71771	11.3872	0.00613453	SAMD4A	10.5142	10.0161	11.9743	12.0336
NM_015621	1.06884	3.26875	0.11165	CCDC69	2.17378	2.96357	3.97641	3.31928
NM_015641	0.620007	8.75156	0.339396	TES	8.83024	7.80987	8.65764	9.32332
NM_015656	1.17177	3.59143	0.0657587	KIF26A	2.67365	3.0651	4.21306	3.86819
NM_015659	0.668043	3.70222	0.300925	RSL1D1	2.77558	3.71245	4.01698	3.95343
NM_015695	0.632199	5.99428	0.280329	BRPF3	5.79247	5.47519	6.10489	6.42721
NM_015717	3.34599	0.923828	0.000430997	CD207	-2.21908	-0.99459	1.18434	2.27114
NM_015993	2.01702	4.1506	0.00176417	PLLP	3.16931	2.36358	4.85158	4.82219
NM_016231	0.826071	9.43534	0.189251	NLK	9.17751	8.71338	9.40089	10.0964
NM_016232	1.25328	4.56504	0.0370593	IL1RL1	3.65986	3.9344	5.25501	4.82219
NM_016277	0.719845	5.18938	0.232638	RAB23	4.96053	4.58552	5.01072	5.87489
NM_016289	1.65918	8.45672	0.00731659	CAB39	7.43496	7.36679	8.83511	9.2553
NM_016341	0.867335	2.00736	0.235427	PLCE1	1.63727	1.31755	1.94255	2.68409
NM_016354	0.715889	2.5821	0.342343	SLCO4A1	1.24087	2.69455	3.15288	2.46937
NM_016441	1.07138	12.6176	0.124239	CRIM1	12.4491	11.2955	12.3161	13.5427
NM_016463	0.668952	3.00679	0.413706	CXXC5	1.87628	3.0651	3.94521	1.8411
NM_016498	1.34176	1.65635	0.0760097	MTFP1	0.773556	0.87098	1.71487	2.51495
NM_016511	1.45104	6.10353	0.0167401	CLEC1A	5.3622	5.02834	6.40154	6.87236
NM_016531	1.35179	8.04041	0.0572131	KLF3	7.61692	6.64973	7.59128	9.14095
NM_016612	1.21361	5.90023	0.0810847	SLC25A37	4.41464	5.65692	6.935	5.45716
NM_016654	0.751426	6.64367	0.205406	GABPB1	6.08824	6.33774	7.05675	6.87673
NM_016952	1.55976	4.0141	0.0166369	CDON	3.27054	2.77666	4.07577	4.99296
NM_016955	0.734227	5.14436	0.309619	SEPSECS	5.35892	3.60416	4.64059	5.99233
NM_017436	1.22681	3.22904	0.0805003	A4GALT	1.87628	2.89169	4.09485	3.12721
NM_017495	0.933581	4.87411	0.269576	RBM38	2.88909	5.02415	5.9924	3.6404
NM_017515	0.750914	5.84558	0.231691	SLC35F2	4.85737	5.82072	6.53499	5.67358
NM_017542	1.02325	6.17119	0.116597	POGK	5.90471	5.14114	5.87867	7.07423
NM_017551	0.638298	2.61392	0.350854	GRID1	2.20335	2.28158	2.46658	3.21267
NM_017554	1.38672	6.78881	0.0309226	PARP14	6.30658	5.43782	6.87695	7.66416
NM_017590	2.07859	6.69108	0.00448202	ZC3H7B	4.45821	5.83517	7.91686	6.52512
NM_017684	1.37072	9.47993	0.0676755	VPS13C	9.05516	8.04911	8.75717	10.6689
NM_017705	0.84221	1.5312	0.312263	PAQR5	1.59328	-0.0353182	1.61269	2.04127
NM_017772	0.801482	6.41484	0.18011	TBC1D22B	5.67604	6.19385	6.80202	6.71528
NM_017816	0.636508	4.01202	0.294592	LYAR	3.49034	3.79358	4.30603	4.26486
NM_017851	0.845147	3.90256	0.336509	PARP16	3.91345	2.71552	1.98407	5.13108
NM_017860	0.644668	1.39753	0.400331	C1orf56	1.18269	0.713106	1.44441	1.76769
NM_017892	0.849675	7.87377	0.192217	PRPF40A	7.70288	6.98378	7.62037	8.66848
NM_017922	0.752679	5.71211	0.202704	PRPF39	5.46341	5.08585	5.70952	6.30929
NM_017926	1.0323	6.86134	0.101777	GPATCH2L	6.52574	5.92343	6.76974	7.66921
NM_017988	0.772617	7.15532	0.225602	SCYL2	7.00224	6.36454	6.90559	7.90679
NM_018010	0.870013	5.07412	0.181757	IFT57	5.00318	3.96974	4.75894	5.91369
NM_018039	0.748887	2.4759	0.395534	KDM4D	2.79513	0.438258	1.8103	3.39436
NM_018058	0.678994	3.96297	0.287778	CRTAC1	3.96614	3.03204	4.35433	4.13952
NM_018107	0.728348	4.01812	0.237627	RBM23	3.80192	3.37292	4.1597	4.48696
NM_018178	0.944685	5.12214	0.105658	GOLPH3L	4.35661	4.75715	5.67824	5.32906
NM_018186	1.6321	6.42523	0.0269917	C1orf112	5.84968	4.72649	5.85088	7.66669
NM_018214	1.04198	6.93929	0.0810489	LRRC1	6.30829	6.34449	7.17911	7.536
NM_018235	0.643377	4.86341	0.273866	CNDP2	4.26845	4.70043	5.27187	5.00099
NM_018290	0.824283	5.22332	0.162101	PGM2	4.97774	4.48529	5.34141	5.78008
NM_018294	0.820444	7.48547	0.38548	CWF19L1	7.7748	5.33993	5.55622	8.68415
NM_018357	1.00423	3.89654	0.136421	LARP6	3.74274	2.69455	3.83607	4.67938
NM_018370	0.941319	5.74465	0.108221	DRAM1	4.89862	5.44412	6.23956	6.02813
NM_018398	0.820698	2.28339	0.271975	CACNA2D3	1.94789	1.65807	1.76337	3.18474
NM_018431	1.42176	5.92021	0.0508699	DOK5	5.52325	4.33077	5.27605	7.11365
NM_018464	1.09603	5.48787	0.0708809	CISD1	5.0446	4.6025	5.49291	6.27658
NM_018569	0.730726	6.17279	0.24807	AP1AR	6.07231	5.36669	5.91669	6.90482
NM_018682	1.57099	8.89111	0.0149265	KMT2E	8.02244	7.77095	8.92646	9.86877
NM_018723	1.00635	2.33285	0.2928	RBFOX1	2.51765	0.0984251	1.11127	3.53373
NM_018890	0.876627	5.29806	0.138582	RAC1	4.4397	5.07372	5.81394	5.50312
NM_018984	1.30251	8.27847	0.0347211	SSH1	7.69639	7.23773	8.67002	8.89652
NM_018986	0.740496	7.41133	0.257436	SH3TC1	6.29118	7.46293	8.05356	7.32031
NM_019063	0.614627	6.75727	0.356839	EML4	6.71081	6.0506	6.14434	7.57955
NM_019613	0.619889	5.27053	0.322624	WDR45B	4.46433	5.26723	5.93797	4.98489
NM_020131	0.710557	4.36155	0.258408	UBQLN4	3.49034	4.30333	4.93863	4.31726
NM_020311	4.08821	5.69428	5.68937e-09	ACKR3	2.92502	2.00325	6.19605	6.95115
NM_020336	0.619315	7.86309	0.315998	RALGAPB	7.73802	7.26377	7.80184	8.41338
NM_020343	0.657476	9.47537	0.338007	RALGAPA2	9.52316	8.52762	8.99312	10.2682
NM_020424	1.37946	5.86202	0.025801	LYRM1	5.09673	4.93308	5.76714	6.83466
NM_020440	1.59351	5.76916	0.00755487	PTGFRN	4.8053	4.72649	6.0126	6.64014
NM_020529	3.333	6.06845	1.33708e-06	NFKBIA	3.89545	3.24894	6.35285	7.35675
NM_020650	1.42359	3.81598	0.0549435	RCN3	2.04906	3.46248	4.86275	3.51142
NM_020666	1.17629	5.74034	0.0745043	CLK4	5.46036	4.4419	5.47118	6.70548
NM_020724	0.622287	2.30106	0.409384	RNF150	2.34271	1.37139	1.94255	3.00476
NM_020727	1.34472	4.31231	0.0286747	ZBTB21	3.62752	3.34628	4.51874	5.10151
NM_020752	0.605861	1.76251	0.439391	GPR158	1.59328	1.14278	1.50271	2.37366
NM_020754	0.771996	8.54343	0.202262	ARHGAP31	8.26167	7.93192	8.84183	8.91364
NM_020760	0.961462	11.3137	0.235574	HECW2	11.4493	9.36329	10.5593	12.3495
NM_020762	0.74706	8.15822	0.254084	SRGAP1	7.29693	8.07216	8.90568	7.882
NM_020792	0.813642	5.45742	0.195804	NCEH1	4.56455	5.3161	6.2288	5.18846
NM_020828	0.606121	2.57298	0.404387	ZFP28	2.60885	1.70076	2.17544	3.29336
NM_020830	1.15482	7.29462	0.0559659	WDFY1	6.64904	6.55982	7.52602	7.96131
NM_020839	1.13015	6.24157	0.0860255	WDR48	5.95772	5.04086	6.02011	7.1628
NM_020868	1.27362	2.50774	0.145801	DPP10	2.26072	1.01327	1.32023	3.81453
NM_020921	1.07025	7.9482	0.0766559	NIN	7.42715	7.19544	8.40597	8.36598
NM_020947	0.846586	4.75141	0.172195	TLDC1	3.77263	4.62484	5.37301	4.77614
NM_020992	1.57381	6.42341	0.0135939	PDLIM1	5.22479	5.61847	6.41868	7.42698
NM_021071	0.672537	5.45837	0.49797	ART4	5.96636	2.46614	3.85857	6.55543
NM_021072	0.616051	1.01677	0.436171	HCN1	0.69248	0.438258	1.0343	1.33134
NM_021101	4.99812	2.90817	4.68481e-06	CLDN1	-0.203055	-3.02646	2.27915	4.70909
NM_021127	1.38617	4.70118	0.0403556	PMAIP1	4.13674	3.51127	4.33841	5.79862
NM_021129	0.752519	4.57859	0.20149	PPA1	4.17455	4.12671	4.75295	5.04049
NM_021137	2.06304	6.08384	0.000774332	TNFAIP1	4.87585	4.53332	6.63775	6.90482
NM_021138	0.665436	4.33103	0.401209	TRAF2	2.49392	4.65229	5.18552	3.61969
NM_021149	2.12844	5.76176	0.0087437	COTL1	2.77558	5.06557	7.04085	5.47457
NM_021170	1.61169	0.807045	0.057013	HES4	-0.0556994	-0.532296	1.11127	1.52198
NM_021202	0.643878	3.7193	0.336611	TP53INP2	3.74274	2.83532	3.43326	4.41666
NM_021216	1.44431	5.68338	0.0146954	ZNF71	4.60941	4.95087	5.9924	6.44203
NM_021614	4.25285	5.93101	5.40656e-05	KCNN2	3.33873	1.14278	4.43888	7.73448
NM_021727	1.01184	5.58796	0.113241	FADS3	4.61492	5.28837	6.47437	5.29027
NM_021804	1.08274	1.61949	0.139275	ACE2	0.69248	1.14278	1.98407	2.04127
NM_021814	0.871643	8.4645	0.169985	ELOVL5	8.14795	7.75331	8.28711	9.23246
NM_021818	2.32567	7.53533	0.00420945	SAV1	6.55613	4.88761	6.97931	8.94831
NM_021982	0.903889	5.60067	0.123331	SEC24A	4.79563	5.31266	6.07878	5.87489
NM_022062	0.706721	1.94659	0.390722	PKNOX2	2.11277	0.535809	1.44441	2.76176
NM_022121	1.6709	4.47638	0.00690013	PERP	3.56056	3.26326	4.75894	5.36061
NM_022124	0.604013	1.65873	0.425528	CDH23	1.45264	1.07948	1.38365	2.27114
NM_022130	0.653088	6.54807	0.268227	GOLPH3	6.11377	6.25063	6.77271	6.89839
NM_022131	0.805598	2.168	0.317748	CLSTN2	2.11277	1.14278	1.38365	3.15626
NM_022168	2.78763	5.37031	0.000285689	IFIH1	3.94879	2.5148	5.0984	6.80516
NM_022451	0.937013	4.97077	0.110271	NOC3L	4.49453	4.3577	5.0984	5.59086
NM_022474	0.648986	6.36522	0.280579	MPP5	6.23324	5.73088	6.41868	6.85474
NM_022489	0.979273	6.31236	0.125574	INF2	5.17343	6.14444	7.05675	6.27327
NM_022739	1.05932	9.99387	0.102967	SMURF2	8.7297	9.81049	10.5776	10.2618
NM_022755	0.750644	6.05554	0.228135	IPPK	5.15464	5.98518	6.70758	5.95147
NM_022763	0.767705	11.8259	0.212001	FNDC3B	11.1196	11.6202	12.2803	12.027
NM_022823	1.52046	1.30612	0.0533778	FNDC4	-0.0556994	0.627179	1.61269	2.04127
NM_022835	0.690866	4.42326	0.259575	PLEKHG2	3.63838	4.33755	4.82326	4.60757
NM_022913	0.650731	6.66874	0.271862	GPBP1	6.17474	6.42627	6.90559	7.00604
NM_023070	0.86733	0.965236	0.296902	ZFP69B	0.606575	0.0984251	1.0343	1.42981
NM_023072	1.35329	5.04975	0.0708692	ZSWIM4	3.16931	4.81173	6.17603	4.47548
NM_023079	0.622931	4.71766	0.299662	UBE2Z	4.12906	4.56833	5.21197	4.71886
NM_024329	0.824972	3.9108	0.232558	EFHD2	2.75576	3.87971	4.67902	3.61969
NM_024408	1.31316	7.58165	0.0296147	NOTCH2	6.63554	6.91293	8.03268	8.15278
NM_024430	0.978635	4.51841	0.102543	PSTPIP2	3.82112	4.05448	5.11718	4.68935
NM_024524	1.0836	6.76251	0.0774067	ATP13A3	6.25634	5.97435	6.80782	7.51793
NM_024540	0.94001	3.04345	0.157679	MRPL24	2.08127	2.79648	3.53454	3.29336
NM_024576	0.814288	6.09247	0.18147	OGFRL1	5.75802	5.48744	6.01761	6.77269
NM_024590	1.15154	8.74407	0.0597189	ARSJ	7.99153	8.11866	9.02486	9.37058
NM_024599	0.967967	5.21462	0.259141	RHBDF2	3.04418	5.37989	6.34689	4.00225
NM_024656	1.09825	5.55153	0.0710926	COLGALT1	4.58716	5.15272	6.31877	5.57481
NM_024677	0.72086	2.0304	0.401224	NSUN7	0.417707	2.19464	2.68374	1.69035
NM_024697	0.661376	1.07921	0.427362	ZNF385D	0.923199	0.220815	1.11127	1.42981
NM_024717	0.7693	12.2817	0.405038	MCTP1	12.626	10.027	10.7386	13.4047
NM_024725	0.691366	7.22215	0.391958	CCDC82	7.48847	5.61569	6.10959	8.22997
NM_024786	0.848658	1.39671	0.290342	ZDHHC11	0.417707	1.14278	1.98407	1.22566
NM_024787	1.13942	5.16031	0.0668596	RNF122	4.83865	4.01273	5.15857	5.97612
NM_024870	1.11179	9.91596	0.0775927	PREX2	9.32265	9.1854	9.92825	10.7037
NM_025009	1.35011	6.49516	0.0407755	CEP135	6.02549	5.19813	6.33491	7.48395
NM_025079	2.5433	6.06432	3.70068e-05	ZC3H12A	4.1894	4.39717	6.77122	6.90482
NM_025145	0.65905	1.75135	0.372553	CFAP43	1.40254	1.26161	1.8103	2.16078
NM_025153	1.03699	2.32382	0.177337	ATP10B	1.05877	2.10211	3.116	2.10226
NM_025195	1.46645	4.51025	0.0165933	TRIB1	3.60554	3.60416	4.69161	5.37304
NM_025239	0.848351	6.2253	0.166002	PDCD1LG2	5.99623	5.42833	6.20486	6.89192
NM_030632	0.602369	4.28073	0.456967	ASXL3	2.3949	4.65772	5.11251	3.53373
NM_030640	1.00541	5.86811	0.0810321	DUSP16	5.33574	5.22031	6.2288	6.3381
NM_030780	1.12454	5.88533	0.0697335	SLC25A32	5.49364	4.87834	5.7878	6.74427
NM_030818	0.784789	4.15897	0.205617	CCDC130	3.64916	3.77372	4.11368	4.80394
NM_030938	0.870754	7.24705	0.155269	VMP1	6.67036	6.82037	7.19577	7.94475
NM_030952	4.26881	5.38943	1.07667e-10	NUAK2	2.04906	2.06991	6.37837	6.26663
NM_030958	5.80091	11.9619	0.00147705	SLCO5A1	8.02451	4.38413	5.14032	13.9333
NM_030964	0.849068	6.28766	0.164082	SPRY4	5.89794	5.69965	6.18496	7.00405
NM_031371	0.760302	7.9256	0.206166	ARID4B	7.42087	7.56684	8.15418	8.35114
NM_031414	0.928646	1.22314	0.228982	STK31	0.773556	0.438258	1.38365	1.69035
NM_031439	1.29872	5.35231	0.0258854	SOX7	4.73112	4.37098	5.82826	5.89226
NM_031461	2.02681	5.18821	0.0103763	CRISPLD1	4.34339	3.12902	4.30603	6.62463
NM_031468	0.797919	1.79578	0.35974	CALN1	1.87628	0.438258	1.0343	2.76176
NM_031469	0.959839	6.20198	0.110347	SH3BGRL2	5.3978	5.8542	6.37643	6.80056
NM_031844	0.60531	6.13257	0.34981	HNRNPU	6.16162	5.31266	5.74316	6.85695
NM_031903	0.839847	1.54238	0.309746	MRPL32	1.40254	0.535809	1.0343	2.42231
NM_031914	0.633351	1.44803	0.457774	SYT16	1.59328	0.0984251	1.38365	1.91096
NM_031925	1.15791	2.0535	0.11058	TMEM120A	0.850317	1.70076	2.46658	2.51495
NM_032016	0.602287	7.50564	0.350549	STARD3NL	7.55377	6.65517	7.23069	8.17069
NM_032017	0.722109	5.64658	0.270686	STK40	4.51825	5.71275	6.39193	5.32906
NM_032111	0.622925	4.54768	0.287437	MRPL14	4.12906	4.26116	4.85158	4.78547
NM_032148	0.884904	5.90402	0.127135	SLC41A2	5.5291	5.24576	6.12591	6.41824
NM_032160	0.874629	1.66272	0.258494	DSEL	1.50106	0.627179	1.44441	2.42231
NM_032168	0.768182	6.5563	0.229173	WDR75	6.49767	5.61289	6.39386	7.25969
NM_032515	0.620528	5.11268	0.354665	BOK	3.96614	5.27077	5.83962	4.69926
NM_032547	0.832479	5.25379	0.175189	SCOC	5.15841	4.26116	5.26346	5.89226
NM_032682	0.996725	10.1102	0.148302	FOXP1	9.78844	9.20893	9.57742	11.0912
NM_032784	0.877061	4.06026	0.337133	RSPO3	4.36318	1.65807	2.78117	5.20246
NM_032785	0.90948	2.78926	0.219524	AGBL4	2.51765	1.96873	2.27915	3.73972
NM_032802	1.26987	5.63903	0.0288987	SPPL2A	4.99897	4.72649	6.12126	6.1559
NM_032833	1.20382	4.35488	0.116222	PPP1R15B	4.13674	2.89169	3.47754	5.54217
NM_032844	0.67143	4.20682	0.281097	MASTL	4.02528	3.60416	4.09485	4.82219
NM_032857	1.01539	5.41103	0.125151	LACTB	5.31219	4.06269	5.20321	6.27327
NM_032888	0.891279	8.09545	0.276171	COL27A1	6.00465	8.31607	9.07765	7.40747
NM_033027	1.40859	4.77477	0.0310404	CSRNP1	3.49034	4.21772	5.78193	4.58637
NM_033120	4.42522	1.7336	3.90455e-06	NKD2	-3.04265	-0.99459	2.85016	2.46937
NM_033157	1.42892	11.2867	0.0285689	CALD1	10.7778	9.89306	11.4763	12.1157
NM_033211	0.800579	4.98071	0.268986	C5orf30	4.93872	3.96099	3.99683	6.0163
NM_033212	0.653396	3.33747	0.351203	CCDC102A	2.46979	3.30537	4.05644	2.90559
NM_033225	1.07785	3.01225	0.221601	CSMD1	2.9773	1.42331	1.66469	4.26486
NM_033262	3.89965	2.46463	3.69847e-06	SLC8A3	-0.0556994	-0.99459	2.87244	3.83264
NM_033364	1.71954	1.34736	0.0568843	MAATS1	0.850317	-0.745004	1.0343	2.55913
NM_033390	1.22249	8.81794	0.101371	ZC3H12C	8.69857	6.98054	8.50823	9.81399
NM_033396	0.633976	5.77193	0.33283	TNKS1BP1	4.77116	5.85892	6.51389	5.35435
NM_033452	1.22821	2.81567	0.0705494	TRIM47	2.34271	1.74222	3.05886	3.51142
NM_033547	2.09285	7.3508	0.0173989	INTS4	6.05417	5.85657	5.59359	8.91417
NM_033550	0.807552	2.48902	0.272315	TP53RK	2.23232	1.78253	2.06369	3.34474
NM_033637	1.58424	11.5972	0.22157	BTRC	11.5038	7.61367	7.73045	13.1489
NM_033647	1.52367	4.68285	0.0155218	HELB	3.92237	3.52322	4.74089	5.64311
NM_052864	3.76261	5.66343	1.9051e-07	TIFA	3.04418	2.53853	5.68455	7.12104
NM_052867	0.873786	6.47751	0.253392	NALCN	6.57887	4.9286	5.65272	7.49821
NM_052961	1.68403	2.66364	0.0283907	SLC26A8	1.12206	1.89711	3.80165	2.27114
NM_052966	3.62931	3.6525	6.37363e-07	FAM129A	0.313111	1.37139	4.62099	4.48696
NM_058164	1.49912	1.31585	0.0639706	OLFM2	-0.367191	0.794202	1.98407	1.60862
NM_058195	0.734126	4.31924	0.265381	CDKN2A	4.23305	3.48708	3.92403	5.12375
NM_058246	0.78891	7.3872	0.225721	DNAJB6	6.25634	7.39955	8.03885	7.32831
NM_080423	0.822474	5.44543	0.154133	PTPN2	4.92104	5.02415	5.93268	5.64311
NM_080430	1.9278	1.27306	0.0215186	SELM	0.0779903	-0.0353182	1.25388	2.42231
NM_080645	0.817694	7.59039	0.170987	COL12A1	7.24812	6.9881	7.95194	7.93116
NM_080682	9.11191	8.04399	8.46331e-15	VCAM1	-0.0556994	-0.0353182	6.94555	9.86685
NM_080927	0.790568	9.37384	0.219431	DCBLD2	9.24415	8.51496	9.2601	10.0615
NM_130773	0.801175	2.10439	0.332933	CNTNAP5	2.08127	1.01327	1.38365	3.06728
NM_138295	1.12027	6.03756	0.0616333	PKD1L1	5.34572	5.39946	6.11427	6.79364
NM_138356	0.769907	5.98923	0.45635	SHF	6.38124	3.45003	3.50632	7.22411
NM_138441	1.18702	2.66182	0.0910932	MB21D1	1.72141	2.10211	3.44817	2.64363
NM_138455	2.95221	6.9445	0.000467412	CTHRC1	5.28133	4.15001	6.06675	8.53658
NM_138571	1.26068	3.87209	0.0843992	HINT3	3.56056	2.49068	3.37202	4.97676
NM_138573	0.665095	1.30488	0.401563	NRG4	0.773556	0.943878	1.25388	1.76769
NM_138618	0.747507	2.60366	0.366674	RHCE	1.5479	2.53853	3.56222	1.42981
NM_138627	0.694078	7.34772	0.269754	BCL2L11	7.35324	6.4151	7.39073	7.87547
NM_138694	1.12525	1.39629	0.165599	PKHD1	0.69248	0.713106	1.11127	2.32331
NM_138811	0.901555	2.04265	0.233502	C7orf31	1.76172	1.20342	1.76337	2.87095
NM_139072	2.12348	2.1421	0.0161219	DNER	1.2968	-0.0353182	1.61269	3.57735
NM_139239	1.1679	2.0569	0.129769	NFKBID	0.773556	1.70076	2.89439	1.8411
NM_139265	0.635804	8.13611	0.291947	EHD4	7.66553	7.89161	8.46673	8.36909
NM_139283	1.04543	5.42386	0.0810768	PPTC7	4.55885	5.01572	6.15347	5.46299
NM_144633	0.703237	2.0115	0.326496	KCNH8	1.2968	1.82174	2.02443	2.51495
NM_144657	1.14631	7.24893	0.0660387	HDX	6.77252	6.32415	7.26689	8.05203
NM_144725	1.20959	2.47766	0.19329	TTC23L	0.200335	2.41577	3.60277	1.42981
NM_144972	0.857646	2.23186	0.243507	LDHAL6A	1.83909	1.61407	1.8998	3.06728
NM_144975	1.2618	5.37179	0.0357312	SLFN5	4.8292	4.35101	5.53543	6.14507
NM_145004	0.636677	6.12517	0.306449	ADAM32	5.27786	6.13475	6.681	6.06307
NM_145018	0.916986	4.09997	0.170665	DDIAS	3.94004	3.08135	3.83607	4.94382
NM_145109	2.16294	5.56485	0.00357631	MAP2K3	2.92502	4.75209	6.74127	5.56942
NM_145648	0.845898	5.58609	0.143671	SLC15A4	5.02818	5.16802	6.04729	5.83501
NM_145803	0.641993	5.58323	0.366574	TRAF6	5.76795	4.3577	4.87384	6.4567
NM_145804	0.713777	3.15252	0.295035	ABTB2	2.11277	3.15995	3.69317	3.12721
NM_147129	1.50994	4.37445	0.0156149	ALS2CL	3.06043	3.72284	5.14032	4.69926
NM_147187	1.20303	8.32568	0.0653013	TNFRSF10B	6.96064	8.04446	9.04032	8.5234
NM_148674	1.21578	2.44309	0.080415	SMC1B	1.2968	2.00325	2.99936	2.79908
NM_152222	0.998065	5.13117	0.166	RELT	3.67049	5.07777	6.13515	4.48696
NM_152230	0.890283	6.69631	0.147059	IPMK	6.48569	5.80124	6.81646	7.29277
NM_152270	0.715012	6.57008	0.269545	SLFN11	6.50214	5.73603	6.21797	7.33943
NM_152271	0.651668	4.90417	0.32189	LONRF1	5.03641	3.78368	4.60777	5.61199
NM_152281	1.41827	5.88583	0.0545008	GORAB	5.61685	3.96099	5.45281	7.01202
NM_152305	0.915801	4.08116	0.146754	POGLUT1	3.0765	3.89817	4.5877	4.31726
NM_152313	0.771482	6.31771	0.294979	SLC36A4	6.43519	4.97716	5.55278	7.27301
NM_152316	0.9534	5.61319	0.174678	ARL14EP	5.57223	4.26827	5.04545	6.5931
NM_152336	1.15563	2.16026	0.151479	AGBL1	1.5479	1.42331	1.38365	3.31928
NM_152409	0.743311	4.78975	0.230839	C5orf24	3.94879	4.68456	5.44911	4.64904
NM_152525	0.976307	2.01393	0.239118	ALS2CR11	0.313111	2.00325	2.73328	1.8411
NM_152542	1.28397	4.93515	0.0307963	PPM1K	4.1894	4.12671	5.10312	5.7181
NM_152546	1.38742	6.62044	0.0454328	SRFBP1	6.1254	5.29536	6.18719	7.73207
NM_152586	0.755111	4.33703	0.212204	USP54	3.77263	4.02118	4.86831	4.4046
NM_152667	0.919377	2.28908	0.210783	NANP	1.94789	1.52184	2.02443	3.12721
NM_152701	0.614193	2.05459	0.408397	ABCA13	1.87628	1.47341	1.66469	2.76176
NM_152716	1.34444	6.19092	0.0608265	PATL1	5.85435	4.64138	5.7002	7.30741
NM_152862	0.915049	7.75908	0.13435	ARPC2	7.28834	7.17003	7.81987	8.41113
NM_152879	1.03461	5.90821	0.0812375	DGKD	4.98627	5.5588	6.10253	6.53622
NM_153228	1.54859	2.48454	0.0781818	ANKFN1	2.08127	0.713106	1.50271	3.85053
NM_153341	1.54913	5.26071	0.00961302	RNF19B	4.12133	4.4356	6.08117	5.53665
NM_153372	2.27955	1.1259	0.00777111	C1QTNF1	-1.31611	0.0984251	1.85574	1.76769
NM_153377	0.804807	7.9852	0.232818	LRIG3	7.97716	6.87148	7.69728	8.77241
NM_153499	0.907857	5.75845	0.164427	CAMKK2	4.51236	5.70752	6.55923	5.53665
NM_172211	3.21182	5.93478	3.10826e-07	CSF1	3.74274	3.39908	6.78009	6.80286
NM_172232	0.911465	6.76666	0.161579	ABCA5	6.53594	5.87066	6.43748	7.62962
NM_172374	2.22047	1.56294	0.00601676	IL4I1	0.313111	-0.182739	1.85574	2.64363
NM_172388	1.28994	6.50304	0.0300363	NFATC1	5.743	5.69438	6.98315	7.03371
NM_173354	2.19588	3.07426	0.00119514	SIK1	1.45264	1.74222	3.84736	3.73972
NM_173464	0.760724	1.53318	0.361994	L3MBTL4	1.50106	0.438258	1.11127	2.32331
NM_173475	1.30929	7.89972	0.0314615	DCUN1D3	6.93774	7.24857	8.44598	8.37451
NM_173515	2.77131	8.07927	6.23747e-05	CNKSR3	6.59847	5.3733	8.70108	9.04517
NM_173545	1.81658	6.35415	0.00319058	APLF	5.16594	5.1944	6.64748	7.27798
NM_173556	1.19923	1.27759	0.122496	CCDC83	0.417707	0.535809	1.98407	1.22566
NM_173701	0.622902	6.31509	0.300552	WARS	6.22425	5.65963	6.37448	6.78204
NM_173829	0.98351	6.50667	0.139858	SREK1IP1	6.29633	5.45039	6.13054	7.42549
NM_173854	0.640028	4.0571	0.313241	SLC41A1	3.4783	3.87039	4.67902	3.85053
NM_174887	1.05062	2.53611	0.128764	IFT20	1.63727	2.10211	3.22392	2.55913
NM_174908	1.37586	9.56499	0.0648357	CCDC50	9.20083	7.99171	9.00072	10.7105
NM_174920	1.9815	3.16793	0.00572093	SAMD14	1.59328	2.06991	4.28957	3.12721
NM_175075	0.741296	5.18356	0.306636	TDRP	3.75277	5.3433	6.08356	4.48696
NM_175617	0.61476	1.96955	0.424775	MT1E	1.91253	1.20342	1.55875	2.68409
NM_175624	0.900293	5.90447	0.136285	RAB3IP	5.49961	5.26367	5.7552	6.67569
NM_175733	0.621561	2.72658	0.384248	SYT9	2.81442	1.70076	2.75742	3.18474
NM_175736	1.15692	8.18524	0.0820672	FMNL3	6.69789	8.00348	8.83262	8.44169
NM_175842	0.963064	4.34996	0.213894	SMOX	2.87078	4.32396	5.41915	3.36976
NM_175888	1.70223	1.85267	0.019518	ZNF620	0.773556	0.713106	2.57924	2.27114
NM_176812	0.927538	6.91269	0.149843	CHMP4B	5.69957	6.83242	7.56843	6.97377
NM_176822	0.850631	1.77426	0.305241	NLRP14	1.67995	0.713106	1.0343	2.76176
NM_177424	0.763701	6.67153	0.198527	STX12	6.11377	6.35455	6.88519	7.1118
NM_177454	1.23017	6.54696	0.0519265	FAM171B	6.18032	5.29883	6.6873	7.3171
NM_178123	0.747375	8.28531	0.275579	SESTD1	8.23194	7.36927	7.74938	9.14774
NM_178140	1.40353	5.19588	0.0286846	PDZD2	3.61657	4.80196	6.04239	5.32906
NM_178170	0.64145	1.5102	0.410321	NEK8	1.05877	1.07948	1.98407	1.33134
NM_178496	1.11934	6.59883	0.0721769	MB21D2	5.57506	6.21793	7.34963	6.67318
NM_178819	0.610465	6.38381	0.299343	GPAT4	5.95337	6.13085	6.69982	6.60895
NM_178824	1.01902	1.23829	0.188659	WDR49	0.773556	0.333629	1.55875	1.60862
NM_178857	0.794846	1.5237	0.302956	RP1L1	1.2968	0.627179	1.94255	1.60862
NM_181093	0.610056	6.00599	0.35654	SCYL3	6.104	5.04501	5.52843	6.77269
NM_181349	0.754821	7.29561	0.224061	SMURF1	6.43519	7.20103	7.84966	7.35362
NM_181509	0.920756	1.28953	0.250288	MAP1LC3A	0.417707	0.943878	1.18434	1.97758
NM_181673	0.814181	6.66838	0.178092	OGT	6.31676	6.08324	6.68887	7.28786
NM_181700	1.06441	6.28719	0.0805215	PPP2R1B	5.7949	5.51162	6.31267	7.0454
NM_181844	0.627103	6.11343	0.285519	BCL6B	5.66014	5.86128	6.40346	6.37873
NM_182488	1.01578	7.11034	0.0891855	USP12	6.60264	6.42149	7.40799	7.64379
NM_182540	0.712242	5.40248	0.241214	DDX26B	5.30539	4.61929	5.27187	6.05538
NM_182557	1.27392	4.13555	0.0368818	BCL9L	3.33873	3.38606	4.60111	4.66934
NM_182648	0.98592	7.3086	0.102115	BAZ1A	6.66772	6.79596	7.47232	7.93011
NM_182676	1.14937	4.366	0.0583896	PLTP	3.56056	3.79358	4.5877	5.04049
NM_182685	2.53732	6.57129	9.33401e-05	EFNA1	4.38914	5.12947	7.59296	7.03957
NM_182763	0.62357	4.32616	0.319998	MCL1	4.19677	3.72284	4.10429	4.97676
NM_182899	2.34536	8.677	0.0022755	CREB5	7.6448	6.11515	8.49213	9.97909
NM_182919	1.10848	3.04949	0.130762	TICAM1	1.50106	2.91	3.82469	3.00476
NM_182920	2.06397	8.52672	0.00226169	ADAMTS9	6.41164	7.64202	8.99025	9.41483
NM_182962	6.02204	4.4407	2.76924e-12	BIRC3	-0.203055	-0.99459	4.62755	5.97205
NM_182978	0.69108	2.88057	0.293313	GNAL	2.49392	2.44117	3.3404	2.93941
NM_183235	1.42495	6.52569	0.0205932	RAB27A	5.68916	5.60167	6.66034	7.39076
NM_183241	1.08777	2.02245	0.207477	C9orf142	1.98241	0.333629	1.55875	3.03636
NM_198152	1.22492	1.73008	0.159308	UTS2B	1.5479	0.0984251	1.18434	2.83547
NM_198182	0.648696	2.15621	0.380843	GRHL1	2.20335	1.14278	1.98407	2.76176
NM_198576	1.22463	4.77908	0.139886	AGRN	2.34271	4.78718	5.88142	4.11013
NM_198584	2.14131	3.17064	0.00332861	CA13	0.923199	2.25318	4.14147	3.53373
NM_198721	0.733258	7.24619	0.492536	COL25A1	7.71832	4.15769	5.03067	8.43947
NM_198965	2.30293	1.47715	0.00720512	PTHLH	-0.367191	0.220815	1.38365	2.79908
NM_199000	0.797589	2.21745	0.253868	LHFPL3	1.72141	1.74222	2.49558	2.55913
NM_199044	0.880846	3.59186	0.19972	NSUN4	2.63077	3.39908	4.4087	3.24007
NM_199355	1.09581	7.93986	0.114399	ADAMTS18	6.23144	7.89391	8.60455	8.12733
NM_201224	0.667556	4.1112	0.283193	DDX47	3.94879	3.48708	4.00694	4.71886
NM_201403	1.46478	1.74513	0.0577361	MOB3C	0.850317	0.713106	2.65831	1.60862
NM_201559	0.833477	7.52177	0.163681	FOXO3	7.17072	6.90838	7.73273	8.01186
NM_203281	1.22244	8.67272	0.100239	BMX	8.34858	7.35764	7.90542	9.81967
NM_203394	0.79962	6.31224	0.207064	E2F7	6.02962	5.66503	5.97191	7.12288
NM_203403	1.00159	1.69502	0.224016	LURAP1L	1.63727	0.220815	1.25388	2.64363
NM_207317	0.63101	1.31033	0.467275	ZNF474	1.35064	0.220815	1.0343	1.91096
NM_207322	3.4087	2.52907	0.000243112	C2CD4A	0.51523	-0.532296	2.02443	4.19658
NM_207345	1.13579	3.47433	0.0915827	CLEC9A	3.1081	2.41577	3.43326	4.31726
NM_207359	1.10793	2.77769	0.153617	GADL1	2.65237	1.14278	3.6806	2.42231
NM_207372	1.15896	1.90095	0.115486	SH2D4B	0.992576	1.31755	2.57924	1.97758
NM_207585	1.25321	6.48543	0.0392108	IFNAR2	5.6734	5.7765	7.26056	6.62723
NM_207627	1.41215	5.30086	0.0209064	ABCG1	3.92237	4.80196	6.00758	5.64823
NM_212481	0.88817	5.48435	0.127499	ARID5A	5.03641	4.90597	5.66234	6.03597
NM_213569	0.840546	3.93122	0.174059	NEBL	3.41653	3.46248	4.51874	3.98616
NM_213589	1.60244	7.41956	0.0087311	RAPH1	6.16726	6.61248	8.04009	7.97768

## Sheet: 0_vs_60_min_TNFa_downegulated
RefSeq	Log2_FC	logCPM	Pval	Symbol	0.rep1	0.rep2	60.rep2	60.rep1
NM_000033	-1.09044	2.84849	0.205805	ABCD1	2.73567	3.57002	2.93729	-0.125535
NM_000051	-0.715049	6.29625	0.223653	ATM	6.69008	6.51268	5.87315	5.90516
NM_000121	-1.33325	1.3993	0.126804	EPOR	1.45264	1.96873	1.11127	-1.38297
NM_000124	-0.672817	6.01009	0.245695	ERCC6	6.29976	6.30179	5.58687	5.66854
NM_000137	-0.732778	2.84764	0.292011	FAH	2.541	3.51127	2.63243	2.04127
NM_000222	-1.78648	6.11682	0.0790311	KIT	4.67946	7.5538	5.81394	2.46937
NM_000245	-0.825403	6.33748	0.164445	MET	6.87597	6.46703	5.85088	5.87051
NM_000251	-0.768487	4.07136	0.208125	MSH2	4.28928	4.46066	3.71799	3.48875
NM_000252	-0.903575	5.79464	0.116826	MTM1	6.25104	6.0792	5.32938	5.19548
NM_000268	-0.845003	6.07509	0.263512	NF2	5.35233	7.03682	6.20266	4.4639
NM_000270	-0.849177	4.41027	0.154495	PNP	4.86664	4.62484	3.93466	3.86819
NM_000313	-0.988771	3.36908	0.139895	PROS1	4.09791	3.24894	2.57924	2.90559
NM_000341	-0.625155	2.14593	0.396691	SLC3A1	2.58658	2.03696	1.66469	1.76769
NM_000382	-0.893278	3.53494	0.159453	ALDH3A2	3.99178	3.74341	3.01946	2.93941
NM_000428	-0.668955	7.92616	0.419665	LTBP2	6.64365	8.9549	8.20225	6.32856
NM_000538	-1.15928	2.93559	0.0787429	RFXAP	3.35199	3.31913	2.34437	1.97758
NM_000603	-0.934856	4.24124	0.119228	NOS3	4.65292	4.56255	3.66791	3.68095
NM_000671	-0.649013	4.03018	0.348312	ADH5	4.82445	3.45003	3.24115	3.96989
NM_000689	-1.02264	6.9631	0.331467	ALDH1A1	8.27521	4.58552	4.15061	7.1964
NM_000723	-0.641625	2.79454	0.355809	CACNB1	2.71529	3.26326	2.78117	1.76769
NM_000789	-1.35413	4.76907	0.0285857	ACE	5.52617	4.96408	3.5205	4.23794
NM_000904	-0.736818	3.11294	0.265055	NQO2	3.60554	3.12902	2.49558	2.79908
NM_000913	-0.634856	2.08463	0.44239	OPRL1	1.45264	2.77666	2.21085	0.535952
NM_000932	-0.891366	3.90432	0.192561	PLCB3	3.58322	4.70043	3.76639	2.76176
NM_000943	-0.600785	2.44547	0.381225	PPIC	2.44526	2.81603	2.10191	1.97758
NM_001001557	-1.07447	2.21377	0.192176	GDF6	1.59328	3.1133	2.06369	0.347273
NM_001001669	-1.00111	4.67947	0.0979421	ARHGEF37	5.31896	4.78222	3.94521	4.19658
NM_001001925	-1.01221	7.9195	0.0938974	MTUS1	8.43289	8.23306	7.23285	7.41049
NM_001002026	-0.737306	2.38602	0.312513	CLDN18	2.20335	2.94593	2.31213	1.22566
NM_001005918	-1.20306	3.39723	0.083387	ATP7B	3.63838	3.98709	3.13456	1.76769
NM_001006944	-0.655388	2.71872	0.348736	RPS6KA4	2.56397	3.24894	2.40677	2.16078
NM_001008707	-0.670812	5.86931	0.253514	EML1	5.81897	6.43262	5.61357	5.34807
NM_001008737	-0.973284	1.38689	0.229302	LOC401052	1.50106	1.74222	1.11127	-0.125535
NM_001008744	-0.699682	6.02295	0.244068	TDP1	6.03168	6.56561	5.89236	5.29027
NM_001008910	-0.672298	2.07312	0.423929	STK16	2.94266	1.01327	1.44441	1.76769
NM_001009933	-0.726576	2.27428	0.298451	DNASE1L1	2.3949	2.60747	1.98407	1.52198
NM_001010844	-1.50501	3.56992	0.0211862	IRAK1BP1	4.37621	3.72284	2.52401	2.64363
NM_001010846	-1.03748	4.9692	0.0899058	SHE	5.51737	5.23127	3.81321	4.73821
NM_001010883	-1.34092	3.99869	0.0342159	FAM102B	4.2041	4.71612	3.38758	2.83547
NM_001010971	-1.26868	3.70634	0.102396	SAMD13	4.81969	2.94593	2.17544	3.39436
NM_001011699	-0.71309	2.50193	0.310196	HAUS8	2.63077	2.83532	2.37591	1.52198
NM_001012329	-1.06815	4.68133	0.200425	CTNNBIP1	3.71222	5.78645	4.74089	2.51495
NM_001012418	-0.602537	3.13758	0.353948	MYLK4	3.57193	3.1133	2.82753	2.68409
NM_001012716	-0.861304	2.03693	0.235752	TYMSOS	2.23232	2.36358	1.61269	1.22566
NM_001012727	-0.691667	3.97004	0.305685	AGPAT2	3.62752	4.67388	3.95568	2.97246
NM_001012994	-1.07468	3.70907	0.111694	SNX30	3.87722	4.30333	3.53454	2.21701
NM_001013627	-0.720023	6.45335	0.23674	NHSL2	6.45837	7.01478	6.29422	5.73745
NM_001017961	-0.852765	1.64632	0.30796	FAM78B	1.12206	2.36358	1.44441	0.347273
NM_001024611	-0.958597	2.50939	0.170201	LRRC66	2.67365	2.981	1.55875	2.16078
NM_001029875	-1.6192	4.07029	0.0170652	RGS7BP	4.00023	5.06148	3.38758	2.46937
NM_001031628	-0.771721	2.62702	0.254289	SMAGP	2.63077	3.1133	2.2454	1.97758
NM_001031701	-1.08263	3.33224	0.178267	NT5DC3	2.541	4.3577	3.24115	1.52198
NM_001031847	-0.992156	5.16353	0.103894	CPT1A	5.23556	5.82556	4.92803	4.08012
NM_001031855	-1.36656	4.20863	0.0309923	LONRF3	5.04051	4.26827	3.15288	3.51142
NM_001032221	-0.823852	4.64986	0.202298	STXBP1	4.31659	5.43782	4.46843	3.75879
NM_001032296	-1.42277	6.94695	0.0260421	STK24	7.10763	7.7828	6.44121	5.54217
NM_001032395	-0.655195	8.72291	0.336767	ADGRG6	9.49448	8.2844	7.73577	8.79106
NM_001032409	-0.846326	0.972893	0.306517	OAS1	1.24087	1.01327	0.572366	-0.125535
NM_001035534	-0.669821	6.45199	0.370555	FAM129B	5.7949	7.30846	6.70758	4.90155
NM_001037174	-0.661985	6.22105	0.293945	ARL5A	6.94651	5.87765	5.57333	6.07833
NM_001037582	-0.655192	7.20201	0.283282	SCD5	7.14429	7.76782	7.03839	6.59576
NM_001037954	-0.786707	4.83006	0.185227	DIXDC1	4.93872	5.33993	4.58095	4.11013
NM_001039349	-1.05222	10.5687	0.101871	EFEMP1	11.3504	10.5379	9.60679	10.2245
NM_001039523	-1.05033	2.54921	0.155267	CHRNA1	3.35199	2.25318	1.50271	2.16078
NM_001039547	-0.941505	3.6844	0.141529	GK5	4.05801	4.02118	3.43326	2.64363
NM_001039661	-0.627038	3.00906	0.350687	TIRAP	3.4783	2.94593	2.73328	2.46937
NM_001040011	-1.14438	1.55327	0.193302	SWI5	1.40254	2.19464	1.38365	-0.833479
NM_001040107	-0.683356	1.77668	0.380999	HVCN1	1.50106	2.30944	1.50271	0.987781
NM_001040177	-0.636314	3.87347	0.359977	AKR1E2	4.6636	3.27743	3.09721	3.81453
NM_001040273	-0.740564	2.00144	0.335831	TYSND1	2.08127	2.33676	1.94255	0.702784
NM_001040285	-0.757119	4.75556	0.230453	PAPD5	4.62041	5.40592	4.71029	3.73972
NM_001042367	-0.646435	4.03099	0.293436	REC114	4.15954	4.41009	3.90254	3.31928
NM_001042473	-1.04822	4.11721	0.0866531	ACBD5	4.68994	4.32396	3.5205	3.41854
NM_001042495	-0.603821	5.46999	0.306484	SLC12A6	5.93366	5.49655	4.86275	5.35435
NM_001042683	-0.602458	6.35865	0.35654	SHPRH	7.10763	5.89154	5.58687	6.35699
NM_001067	-0.673955	4.19511	0.297103	TOP2A	4.83394	3.98709	3.38758	4.1249
NM_001077195	-0.609455	2.85184	0.394585	ZNF436	3.31184	2.79648	1.8103	2.93941
NM_001077427	-1.84705	5.40549	0.00404712	LYPD1	6.40529	5.53835	3.69317	4.56487
NM_001077505	-0.696383	3.28365	0.290589	TAC4	3.60554	3.47484	3.24115	2.27114
NM_001077619	-1.24911	3.79005	0.0524151	UBXN2B	4.59275	3.78368	3.01946	2.97246
NM_001079516	-1.22009	3.1714	0.130755	ASAH2B	4.26845	2.33676	1.61269	2.90559
NM_001080414	-0.7339	5.98984	0.211138	CCDC88C	6.0683	6.50517	5.65272	5.48033
NM_001080437	-0.667966	6.25046	0.338267	SNED1	5.57223	7.11289	6.33089	5.18846
NM_001080480	-1.14087	3.2351	0.080384	MBOAT1	3.60554	3.6808	2.31213	2.68409
NM_001080508	-0.629612	6.9078	0.359599	TBX18	7.63263	6.53497	5.7002	7.09126
NM_001080826	-1.09977	7.07887	0.0768225	SGK223	7.29693	7.71673	6.76379	5.97205
NM_001081492	-0.928709	4.53721	0.173357	KRT80	4.21139	5.37	4.47573	3.18474
NM_001083603	-1.26035	4.21792	0.0372938	PTCH1	4.65292	4.71612	3.47754	3.36976
NM_001097634	-0.744078	4.95934	0.20625	GCNT1	5.34572	5.19066	4.23041	4.77614
NM_001098426	-0.715139	3.70787	0.28822	SMARCD2	3.57193	4.30333	3.73024	2.55913
NM_001098525	-0.87543	4.04155	0.17504	CKAP2	4.77608	3.85156	3.22392	3.75879
NM_001098797	-0.67599	6.14317	0.319377	TOX2	5.6548	6.93768	6.22664	5.05599
NM_001098805	-1.19249	2.67275	0.107202	ANKRD20A4	3.13903	3.01523	1.11127	2.42231
NM_001098831	-1.61622	1.52206	0.0385375	MORN4	1.72141	2.13362	0.775198	-0.436511
NM_001098832	-0.841888	3.89662	0.191749	FAM104A	4.14438	4.29638	3.80165	2.76176
NM_001099438	-1.46071	2.03555	0.0455052	ZNF30	2.60885	2.30944	1.0343	0.987781
NM_001099646	-0.918112	1.33665	0.247037	SLC47A2	1.24087	1.82174	0.866834	0.347273
NM_001099650	-0.833332	5.25513	0.150137	GXYLT1	5.75553	5.42515	4.79438	4.73821
NM_001099691	-0.656288	0.999476	0.41161	TGFA	1.12206	1.07948	0.677344	0.130152
NM_001100389	-0.613495	2.99081	0.36377	TMEM192	3.32535	3.08135	2.97896	2.04127
NM_001100594	-1.07816	8.48944	0.0775877	SNRK	8.68324	9.13813	7.85736	7.84344
NM_001100829	-0.756807	3.22975	0.264883	TMEM170B	3.77263	3.20513	2.34437	3.09756
NM_001102651	-0.665114	2.07175	0.363979	ZNF554	1.87628	2.58486	1.61269	1.60862
NM_001105199	-1.17562	1.34091	0.143469	TMEM177	1.87628	1.37139	0.0538496	0.852309
NM_001105204	-0.730098	1.42044	0.370711	RUSC1	1.35064	1.78253	1.38365	-0.125535
NM_001111125	-0.602022	2.79618	0.38784	IQSEC2	2.56397	3.34628	2.52401	2.27114
NM_001113407	-0.608782	4.23395	0.32132	LDB1	4.15954	4.747	4.05644	3.66082
NM_001114752	-0.683624	7.41672	0.366923	CD55	8.39656	6.38596	6.23526	7.54427
NM_001114753	-0.958131	6.11511	0.146194	ENG	5.7329	7.00948	5.88963	5.10151
NM_001116	-1.07347	3.89346	0.114705	ADCY9	3.49034	4.81173	3.43326	2.97246
NM_001118890	-0.623309	1.39218	0.446397	GLRX	1.50106	1.56869	0.572366	1.22566
NM_001122752	-1.17021	2.64008	0.110644	SERPINI1	3.40385	2.53853	1.44441	2.21701
NM_001122769	-0.780759	4.60201	0.233071	LCA5	5.37849	4.25401	3.6806	4.49835
NM_001122779	-0.612351	6.57772	0.331549	FAM124B	7.17259	6.42786	5.7522	6.59841
NM_001122835	-1.09368	5.52041	0.0671501	TTC13	5.63052	6.21793	5.05035	4.63878
NM_001122962	-1.03853	3.90111	0.098801	SIRPB2	4.52412	4.02118	3.37202	3.12721
NM_001124767	-0.993982	1.99028	0.194028	SMIM4	1.59328	2.75657	1.61269	0.852309
NM_001126181	-0.906689	2.67747	0.182797	NRGN	2.83345	3.12902	2.27915	1.8411
NM_001127217	-0.699938	4.04293	0.292446	SMAD9	4.54159	4.07896	2.89439	4.1249
NM_001127328	-0.614271	4.88376	0.31588	ACADM	5.45729	4.747	4.1597	4.83122
NM_001128165	-0.635452	2.14682	0.405088	FBLN7	1.87628	2.67326	2.2454	0.702784
NM_001128203	-0.7126	2.20384	0.345292	PLA2G16	2.88909	1.74222	1.8103	1.60862
NM_001128615	-0.725349	5.62043	0.206969	ARHGEF3	5.9226	5.93466	5.22502	5.18142
NM_001129765	-0.759604	4.23136	0.207988	NSDHL	4.4083	4.65772	3.66791	3.88565
NM_001129995	-0.73459	4.48205	0.348169	KCTD15	3.7019	5.38644	4.7226	2.68409
NM_001130002	-0.850714	3.32712	0.297632	PQLC2L	4.28928	2.49068	1.76337	3.41854
NM_001130025	-0.649318	4.77702	0.283173	TCAF2	5.31896	4.72131	4.09485	4.65922
NM_001130415	-0.658241	4.60615	0.264274	APOLD1	4.79563	4.95969	4.27291	4.16833
NM_001130924	-0.863618	2.99908	0.292012	TMEM201	2.23232	3.90731	3.09721	1.11162
NM_001131010	-1.01818	3.72206	0.145423	SATB1	4.64217	3.24894	2.75742	3.36976
NM_001134232	-0.87226	4.17025	0.175276	TMEM106B	4.90763	3.97844	3.3404	3.90289
NM_001134296	-0.668013	4.71585	0.281471	AP3M2	5.34572	4.53332	4.06614	4.55399
NM_001134479	-0.607865	7.05928	0.305683	LRRC8D	7.23476	7.41566	6.83218	6.59841
NM_001134878	-0.627959	3.05733	0.358719	KIF9	2.96008	3.54681	3.0393	2.10226
NM_001135047	-0.815655	2.54084	0.232938	JDP2	2.58658	3.01523	2.13914	1.8411
NM_001135733	-0.617283	5.72394	0.304465	TP53INP1	6.33858	5.5354	5.13111	5.58553
NM_001135924	-0.620614	2.24184	0.411961	VWDE	1.83909	2.85435	1.98407	1.60862
NM_001136116	-0.633111	1.91343	0.429245	ZNF879	2.44526	1.65807	0.775198	1.97758
NM_001136126	-0.981491	4.47994	0.133241	CCND3	4.36318	5.23491	4.33038	3.21267
NM_001136191	-0.639203	3.76368	0.308254	KANK2	3.7019	4.27535	3.43326	3.31928
NM_001136199	-0.622673	5.01741	0.409815	GRAMD1A	4.28928	5.85892	5.32535	3.34474
NM_001142287	-0.743021	4.259	0.32462	SEMA4D	3.56056	5.13726	4.4163	2.72345
NM_001142386	-1.17549	2.44968	0.0885108	PDK3	2.85224	2.81603	1.55875	1.76769
NM_001142501	-0.606589	2.19063	0.47275	MON1A	1.45264	2.91	2.46658	0.130152
NM_001142528	-0.721609	4.37025	0.234155	BHLHB9	4.69516	4.63038	4.21306	3.59867
NM_001142545	-0.746583	3.84122	0.241866	ADCK1	3.75277	4.4356	3.60277	3.12721
NM_001142579	-0.822693	3.73886	0.19334	ZNF780A	4.27543	3.8034	3.15288	3.31928
NM_001142640	-0.729637	5.21887	0.206794	TNRC6C	5.46341	5.58468	4.9439	4.62845
NM_001142733	-0.693492	2.58276	0.335023	ASB14	3.19896	2.30944	1.98407	2.27114
NM_001143835	-0.679122	4.71475	0.25216	NFRKB	4.96485	5.02834	4.51874	4.08012
NM_001143917	-1.16301	2.24764	0.109765	LYSMD2	2.51765	2.71552	1.11127	1.76769
NM_001144757	-0.649389	3.55517	0.319975	SCG5	3.51413	4.04623	3.47754	2.72345
NM_001144900	-1.0924	1.30543	0.154442	MIEF2	1.76172	1.37139	0.459146	0.535952
NM_001144958	-0.6395	5.25111	0.304821	CRACR2A	5.24625	5.75387	5.34141	4.19658
NM_001145319	-0.715155	1.92182	0.350215	PLS1	1.76172	2.41577	1.71487	0.987781
NM_001145427	-1.53027	4.19153	0.0135611	SNX18	4.88956	4.55093	3.07816	3.31928
NM_001145526	-0.60783	3.81194	0.452134	AFMID	2.81442	4.70043	4.09485	2.16078
NM_001145642	-0.673374	4.48332	0.26268	KIAA0226	4.51236	4.97281	4.22176	3.93678
NM_001145645	-0.941321	2.52218	0.174659	TNFSF13B	2.56397	3.0651	2.17544	1.52198
NM_001145853	-1.23065	4.12463	0.14743	WFS1	3.27054	5.24936	4.08534	1.69035
NM_001146055	-1.11353	8.81805	0.125836	SNCA	9.81352	8.38355	7.30014	8.68913
NM_001146056	-0.612476	3.76172	0.460565	MBOAT7	2.65237	4.67923	4.05644	2.04127
NM_001146103	-0.672424	2.0488	0.361616	PARP9	1.87628	2.53853	1.8998	1.11162
NM_001146154	-0.75926	2.0649	0.286662	PTGR2	2.46979	2.10211	1.55875	1.52198
NM_001152	-1.26545	1.3618	0.10286	SLC25A5	1.94789	1.37139	0.336278	0.535952
NM_001159587	-0.659641	8.06542	0.340511	CD109	8.88115	7.52365	7.07608	8.13007
NM_001159694	-0.831288	9.47157	0.263631	EMCN	10.3925	8.88633	8.02462	9.572
NM_001159936	-0.605203	2.87594	0.357184	EBNA1BP2	3.19896	2.981	2.37591	2.602
NM_001160167	-0.829427	4.58502	0.232043	PRR5L	4.02528	5.46594	4.56051	3.36976
NM_001160183	-0.702842	4.31243	0.242326	ZNF138	4.77608	4.39717	3.92403	3.86819
NM_001160407	-0.628748	1.25893	0.425419	TLCD1	1.5479	1.20342	0.677344	0.852309
NM_001161407	-0.732196	5.31145	0.237403	NDFIP2	6.05011	5.00724	4.58095	5.14564
NM_001162894	-1.11653	5.0801	0.0543553	KIAA0040	5.40418	5.62125	4.51166	4.27814
NM_001163148	-0.872751	4.76165	0.259603	ETV1	3.68103	5.81588	4.8002	3.29336
NM_001163484	-0.69765	1.88141	0.346723	DCAF11	1.94789	2.19464	1.66469	0.987781
NM_001163677	-0.84811	3.6567	0.183083	KCNMB3	4.16706	3.77372	2.99936	3.26696
NM_001163940	-0.720253	3.19858	0.270487	PYGL	3.25651	3.64845	2.93729	2.51495
NM_001164473	-0.838158	7.90526	0.162739	FNBP1L	8.31427	8.20831	7.41085	7.43737
NM_001164479	-0.82531	2.93737	0.288128	C5orf63	3.84944	2.16445	1.85574	2.83547
NM_001165034	-0.747691	3.12965	0.373313	RNF182	2.34271	3.99569	3.3563	1.11162
NM_001165931	-0.722191	2.67485	0.284771	RRM2	3.06043	2.77666	2.2454	2.16078
NM_001165993	-0.639523	2.56939	0.382496	GDPD1	2.23232	3.17517	2.55189	1.52198
NM_001166061	-0.737039	3.98922	0.269083	GLRB	4.75128	3.59287	3.20649	3.83264
NM_001166167	-0.695861	7.07145	0.354137	NEK6	6.38608	7.95415	7.3022	5.54766
NM_001166294	-1.1211	3.51738	0.105268	SSX2IP	4.40194	3.21989	2.55189	3.03636
NM_001166345	-0.628665	6.07827	0.291142	MDFIC	6.57746	6.08525	5.66553	5.78008
NM_001166415	-0.661103	2.63704	0.42595	EHHADH	3.49034	1.78253	1.38365	2.76176
NM_001167961	-0.659723	2.27774	0.357884	KCTD7	2.541	2.44117	1.61269	2.04127
NM_001168344	-0.994675	7.25621	0.115342	RREB1	7.29006	7.9635	7.02353	6.20191
NM_001168398	-0.65292	5.66237	0.25645	SLC35A1	6.04195	5.83756	5.32938	5.2504
NM_001169117	-0.81805	6.21237	0.201827	STIM2	6.92781	6.06088	5.18106	6.14507
NM_001171137	-0.635725	5.97065	0.271787	STRBP	6.19879	6.2931	5.64626	5.57481
NM_001171162	-1.38006	2.37929	0.0674173	ZMYM3	2.44526	3.09741	1.94255	0.535952
NM_001171617	-0.686987	4.67002	0.24659	PREPL	5.08089	4.81659	4.43139	4.08012
NM_001171690	-1.0606	1.66929	0.186039	GCAT	2.01612	1.89711	1.44441	-0.125535
NM_001172087	-0.712956	4.27671	0.310824	PEX2	5.11629	3.6808	3.22392	4.30434
NM_001172698	-1.09179	2.54112	0.143396	PPARGC1B	2.08127	3.42478	1.98407	1.60862
NM_001173479	-0.816764	5.40347	0.157924	ARHGEF9	5.78516	5.69965	5.0984	4.72857
NM_001175	-0.77384	5.51278	0.214452	ARHGDIB	6.24572	5.27077	4.67902	5.37304
NM_001178061	-0.942751	3.47712	0.179606	SEMA6C	3.28444	4.21772	3.37202	2.10226
NM_001178136	-0.644083	5.32844	0.264188	PUDP	5.43566	5.75387	5.0984	4.80394
NM_001184705	-0.794005	3.98882	0.205819	HADH	4.55885	3.99569	3.27499	3.72039
NM_001184722	-0.844509	4.1826	0.308943	GPI	2.99431	5.23491	4.33038	2.37366
NM_001184726	-1.36649	2.59242	0.055853	TCN2	2.67365	3.31913	1.98407	1.22566
NM_001184772	-0.857014	2.88218	0.283544	BCORL1	2.3949	3.6808	2.97896	0.987781
NM_001184796	-0.931517	3.45945	0.167951	ESYT1	3.46615	4.07896	3.25817	2.32331
NM_001184902	-0.705736	6.63167	0.320044	CARD8	5.94683	7.51769	6.71531	5.49177
NM_001184992	-0.997533	2.35573	0.177203	RNF135	2.11277	3.08135	2.06369	1.11162
NM_001190821	-2.01773	3.37808	0.00233215	SMAD7	4.01698	3.97844	2.21085	1.69035
NM_001190826	-0.777393	2.61923	0.392021	FAM217B	3.58322	1.56869	0.775198	2.83547
NM_001190919	-1.03391	2.71739	0.160762	THRA	2.51765	3.46248	2.52401	1.22566
NM_001193307	-0.818012	1.59239	0.293891	SAMD9	2.17378	1.31755	1.11127	0.852309
NM_001193457	-0.960469	3.25915	0.207454	IFFO1	2.87078	4.08703	3.27499	1.42981
NM_001193511	-0.896019	3.43627	0.174111	MAP3K12	3.41653	4.05448	3.15288	2.51495
NM_001193637	-0.79246	2.51772	0.268056	DHRS4L2	3.13903	2.30944	2.17544	1.76769
NM_001193644	-0.751905	2.82755	0.266869	PEX19	3.32535	2.81603	2.49558	2.16078
NM_001195037	-0.834965	2.93964	0.207585	ECT2L	3.01113	3.43746	2.43699	2.37366
NM_001195104	-0.621593	4.23513	0.31536	GSR	4.30981	4.64685	4.1597	3.48875
NM_001195434	-0.855138	1.84201	0.241659	MLF1	2.04906	2.13362	1.25388	1.22566
NM_001197097	-0.792767	4.2918	0.189198	PRSS3	4.36318	4.82144	3.92403	3.70081
NM_001197293	-1.07069	6.92172	0.0886415	DPYSL2	6.94103	7.67652	6.60984	5.86172
NM_001198633	-1.68846	8.03172	0.0231039	RUNX1T1	9.16981	7.79208	5.9873	7.52491
NM_001199038	-0.6864	2.8946	0.326264	SERINC2	2.56397	3.54681	2.75742	2.04127
NM_001199563	-1.03477	2.562	0.136792	BVES	3.15425	2.60747	2.13914	1.52198
NM_001199818	-0.6823	5.68653	0.24603	ARMCX5-GPRASP2	5.74802	6.17694	5.53891	5.00099
NM_001199859	-0.83272	4.19861	0.199336	ANGPT1	4.63676	4.4229	2.99936	4.18253
NM_001199898	-0.710097	1.74119	0.365117	PDK2	1.67995	2.13362	1.71487	0.347273
NM_001199922	-0.63309	3.83703	0.315421	SIAE	4.26144	3.89817	3.25817	3.6404
NM_001201329	-0.80436	4.81328	0.179138	PPP1R3B	5.36547	4.88298	4.09485	4.55399
NM_001201402	-0.614377	3.96948	0.376573	GALC	4.71582	3.46248	3.07816	4.00225
NM_001201480	-0.678824	4.40234	0.272054	OSBPL6	4.8053	4.55093	3.57586	4.34276
NM_001202549	-0.624602	1.53414	0.425846	SYNJ2BP-COX16	1.5479	1.78253	1.55875	0.130152
NM_001204367	-1.25284	5.4509	0.0370694	MGST2	5.57506	6.21793	4.89031	4.42861
NM_001204447	-0.785543	1.47992	0.342602	AP5S1	1.76172	1.61407	0.201964	1.42981
NM_001204492	-0.658802	4.82138	0.35895	CAMK2G	4.23305	5.62956	5.03561	3.36976
NM_001204813	-1.28389	6.14281	0.0431121	NT5E	7.05184	6.05678	5.06009	5.60147
NM_001205028	-0.734428	4.58848	0.244597	MDM1	5.2498	4.41651	3.74239	4.48696
NM_001206938	-0.647839	5.77616	0.284348	TCAF1	6.42425	5.5617	5.16761	5.61722
NM_001207066	-0.908842	4.23507	0.182792	CXADR	3.88637	5.06148	4.13226	3.00476
NM_001226	-0.788762	4.37543	0.185615	CASP6	4.74124	4.64685	3.82469	3.98616
NM_001242739	-0.767533	1.04296	0.351122	ZNF691	1.18269	1.20342	0.336278	0.535952
NM_001242827	-0.618846	3.87886	0.315216	SIRT5	4.303	3.92543	3.54845	3.46573
NM_001242868	-0.873747	2.6456	0.204096	SLAIN1	2.75576	3.1133	2.21085	1.91096
NM_001243014	-0.729648	3.64906	0.263681	ABCB9	3.58322	4.21035	3.50632	2.79908
NM_001243288	-0.747319	7.32478	0.250352	PVRL3	8.10699	6.97076	6.51566	7.20512
NM_001243727	-0.903056	4.16251	0.185667	TEX264	4.11357	4.82627	4.1597	2.68409
NM_001243731	-0.616004	1.64367	0.420752	RARG	1.91253	1.65807	1.50271	0.702784
NM_001243779	-0.833115	6.34696	0.167551	FAM213A	6.39572	6.94768	6.05218	5.64823
NM_001243795	-0.737202	2.6019	0.318976	CHST12	2.1436	3.31913	2.55189	1.42981
NM_001243799	-0.611898	7.91976	0.309778	TSC22D1	8.18269	8.20089	7.39362	7.74528
NM_001244189	-0.620599	5.71959	0.280738	KIAA0586	5.95988	6.01721	5.25501	5.47457
NM_001244959	-0.747986	5.85566	0.217103	FRMD3	6.45837	5.82072	5.01072	5.7518
NM_001251882	-0.607033	2.49749	0.445454	VIPR1	1.98241	3.15995	2.63243	1.11162
NM_001251934	-0.655616	1.74399	0.397275	NR1H3	1.83909	2.00325	1.11127	1.42981
NM_001252677	-1.31217	3.24817	0.0487973	ACSS1	3.75277	3.64845	2.73328	1.91096
NM_001253901	-1.26369	1.66798	0.116605	MEST	1.63727	2.33676	0.201964	1.22566
NM_001254	-0.96246	2.57756	0.168887	CDC6	3.15425	2.60747	1.71487	2.16078
NM_001256047	-0.629928	3.82729	0.382094	C19orf12	3.4539	4.50349	4.00694	2.46937
NM_001256095	-0.663109	7.6179	0.270753	MYH10	8.10503	7.68319	7.12909	7.35518
NM_001256139	-0.612097	1.95239	0.404852	CAPG	1.83909	2.36358	1.66469	1.33134
NM_001256372	-0.694223	4.043	0.316988	E2F8	4.77608	3.6701	2.93729	4.11013
NM_001256422	-2.08013	2.83917	0.00296537	GPAT3	3.19896	3.65932	1.32023	1.42981
NM_001256438	-1.42199	7.1474	0.0504406	CABLES1	6.60818	8.29489	6.72605	5.57481
NM_001256447	-0.609031	4.68305	0.416078	BCAP31	4.06608	5.47212	4.98026	3.06728
NM_001256644	-1.39306	3.96789	0.0440437	LTA4H	4.99052	3.63751	2.75742	3.34474
NM_001256909	-0.973276	4.21849	0.113175	CYBRD1	4.84804	4.29638	3.50632	3.73972
NM_001257097	-0.611723	2.27128	0.387203	RHNO1	2.51765	2.41577	1.66469	2.04127
NM_001257101	-0.789323	5.94049	0.222763	PCGF5	6.74514	5.57323	4.96479	5.87051
NM_001257159	-0.749353	3.33611	0.243706	CEP41	3.79222	3.42478	2.80454	2.93941
NM_001257291	-0.701087	4.69342	0.303222	SLC9A7	4.09791	5.52653	4.67902	3.72039
NM_001258222	-0.791308	5.05315	0.191939	KCTD1	5.01156	5.67309	4.90119	4.18253
NM_001258241	-0.682187	2.7304	0.379469	TMEM218	3.59442	1.85992	1.98407	2.55913
NM_001258277	-1.26309	5.36965	0.0470448	TMEM200A	6.31168	5.17938	4.25606	4.86681
NM_001258331	-0.718978	3.66469	0.250079	EPB41L1	4.09791	3.77372	3.29163	3.15626
NM_001261418	-0.941926	5.56685	0.137692	EIF2B3	6.40211	5.29536	4.62755	5.31625
NM_001267598	-1.09518	4.70336	0.124997	MGST1	5.6628	4.2824	3.18884	4.57566
NM_001270458	-0.891882	3.0167	0.177371	MAOA	3.32535	3.34628	2.70872	2.10226
NM_001270764	-0.952143	5.68676	0.188136	CHST15	5.04868	6.66733	5.68769	4.16833
NM_001270953	-0.846813	1.83859	0.261897	SLC25A10	1.80092	2.30944	1.66469	0.535952
NM_001271573	-1.33293	1.40749	0.0987808	PEX11A	2.04906	1.37139	0.775198	-0.125535
NM_001271594	-1.36973	3.67614	0.0802196	SESN3	2.99431	4.79212	3.3404	1.8411
NM_001271783	-0.658509	8.18689	0.303873	FAR2	8.11333	8.76741	8.19398	7.30903
NM_001276274	-0.614739	2.52685	0.369875	TMEM80	2.51765	2.91	2.46658	1.60862
NM_001276727	-0.95383	4.34134	0.117598	C11orf74	4.95185	4.4356	3.69317	3.83264
NM_001277233	-0.635176	2.01044	0.383539	TM7SF2	2.08127	2.30944	1.44441	1.69035
NM_001278196	-1.2253	3.45064	0.0850283	ZBTB18	3.77263	3.98709	3.24115	1.60862
NM_001278197	-0.699136	2.73702	0.341437	CDK5RAP3	2.73567	3.17517	2.85016	1.22566
NM_001278594	-1.83091	1.07006	0.0331496	ALDH6A1	1.63727	1.31755	-0.511826	-0.125535
NM_001278636	-1.113	4.65618	0.0926277	EBPL	4.46433	5.5176	4.40106	3.34474
NM_001278710	-1.06031	2.01343	0.172882	NRN1	2.17378	2.46614	1.85574	0.130152
NM_001281432	-0.925553	1.72812	0.204241	ZNHIT3	2.08127	1.89711	1.0343	1.11162
NM_001281773	-0.700633	7.80652	0.27978	ZMYND8	7.6265	8.47517	7.79821	6.88109
NM_001281786	-0.716217	1.99677	0.352749	SHMT1	1.5479	2.65167	1.8998	0.852309
NM_001282224	-0.658955	4.43047	0.283631	ATP7A	4.83394	4.56255	3.64221	4.36781
NM_001282412	-0.832065	3.95059	0.206636	PPP1R7	3.97474	4.52146	3.89167	2.76176
NM_001282427	-1.87238	2.59718	0.0112887	PIK3CG	2.75576	3.46248	1.66469	0.702784
NM_001282456	-1.2017	1.31883	0.123412	LOC100506127	1.76172	1.47341	0.336278	0.535952
NM_001282735	-0.791844	7.18035	0.185335	SPATS2L	7.6642	7.35848	6.59149	6.85252
NM_001282963	-0.606442	4.75014	0.30692	HJURP	5.23556	4.73164	4.47573	4.31726
NM_001284331	-0.613533	2.73431	0.375615	POLM	2.85224	3.04867	1.98407	2.64363
NM_001284404	-0.610839	3.13677	0.349061	PTCD2	3.28444	3.43746	2.85016	2.64363
NM_001286076	-0.641777	2.74042	0.396594	RPA2	2.31589	3.39908	2.80454	1.52198
NM_001286206	-0.928499	5.65604	0.115573	CEP162	6.32855	5.67041	5.15857	5.05599
NM_001286277	-0.715765	6.44009	0.22895	TUBGCP3	6.9267	6.54525	6.13515	5.92217
NM_001286449	-0.682002	3.27349	0.295117	TEX9	3.72246	3.30537	3.01946	2.64363
NM_001286497	-0.716423	2.46535	0.336238	PIF1	2.1436	3.09741	2.40677	1.33134
NM_001286741	-0.669028	2.004	0.368962	UBL7	2.36904	2.00325	1.76337	1.22566
NM_001286819	-0.712573	2.66657	0.301732	LETM2	2.92502	2.89169	2.55189	1.69035
NM_001287046	-0.669276	2.24962	0.421215	SH3GLB2	1.72141	2.92808	2.40677	0.535952
NM_001287144	-0.912175	3.17065	0.176687	TPD52	3.22802	3.74341	2.17544	2.93941
NM_001287390	-0.822153	3.65939	0.301216	CCBL1	2.79513	4.60812	3.75444	2.04127
NM_001287516	-0.735521	3.18922	0.261728	CDC25B	3.6915	3.19023	2.80454	2.64363
NM_001287813	-0.694652	3.79066	0.270628	SNTG1	4.22587	3.88897	3.116	3.59867
NM_001288564	-1.04292	3.51625	0.119815	TMEM9	3.56056	4.17293	3.25817	2.27114
NM_001288743	-1.23251	2.49855	0.120693	C10orf128	3.50228	1.85992	1.32023	1.97758
NM_001288773	-0.702189	4.12234	0.257874	CEACAM21	4.70035	4.03793	3.54845	3.85053
NM_001288953	-0.69865	5.95929	0.304915	TTC7A	5.46341	6.76738	6.06916	4.7573
NM_001288999	-0.976558	2.78896	0.152241	GMIP	3.15425	3.09741	2.43699	1.76769
NM_001289035	-0.821954	2.48235	0.281213	KLC4	2.17378	3.15995	2.46658	0.987781
NM_001289098	-0.603995	4.44632	0.339713	PXK	4.14438	5.09388	4.37007	3.73972
NM_001289936	-1.01315	2.38068	0.168893	ERBB2	2.44526	2.92808	2.13914	0.987781
NM_001290474	-0.767584	1.10356	0.358045	C2CD2L	1.45264	1.01327	0.866834	-0.125535
NM_001291303	-1.03168	8.79596	0.196308	FAT4	9.86443	8.02779	6.94686	8.8467
NM_001291738	-0.678783	1.15721	0.414091	CD24	1.50106	1.01327	1.0343	-0.125535
NM_001291958	-0.612559	6.49615	0.299012	MAP3K4	6.87941	6.64154	6.12822	6.17732
NM_001293643	-1.30445	7.05275	0.141788	PGF	6.25104	8.23079	7.06039	4.23794
NM_001297652	-1.49472	1.13703	0.0754136	DDR1	1.45264	1.52184	0.459146	-0.833479
NM_001300801	-0.725705	5.03996	0.335748	PITPNM2	3.94879	6.03609	5.14491	3.75879
NM_001300804	-1.23675	3.27206	0.17591	MDFI	2.26072	4.40365	3.24115	0.535952
NM_001300927	-0.80002	1.8221	0.310441	PGPEP1	1.5479	2.41577	1.61269	0.702784
NM_001301175	-0.671919	3.14793	0.307089	USP30	3.63838	3.1133	2.57924	2.87095
NM_001302461	-0.604955	5.10942	0.410767	KLF13	4.53579	5.88693	5.41915	3.48875
NM_001302508	-0.946504	5.96818	0.114608	MMP2	6.25986	6.44679	5.74013	4.97676
NM_001303037	-0.724315	6.27617	0.219628	MPP6	6.73505	6.42309	5.80238	5.92217
NM_001304453	-1.26529	1.38362	0.172541	ZNF446	1.18269	2.06991	1.25388	-2.28149
NM_001304466	-0.618863	4.41191	0.367349	SLC29A1	4.15954	5.0367	4.61439	3.06728
NM_001304502	-0.630681	3.3701	0.32237	FOPNL	3.62752	3.59287	3.07816	2.87095
NM_001304725	-1.44577	5.1163	0.0300785	GIPC2	6.17474	4.81173	3.73024	4.56487
NM_001304760	-0.699274	2.129	0.330327	C1orf123	2.31589	2.36358	1.94255	1.22566
NM_001304797	-1.14524	1.64287	0.136715	CCDC134	1.50106	2.30944	1.0343	0.535952
NM_001304813	-0.615036	2.7676	0.362918	TMEM101	2.69462	3.21989	2.57924	2.10226
NM_001305010	-0.62345	5.66893	0.278745	KIAA1715	6.05822	5.80858	5.27605	5.35435
NM_001305049	-0.64966	3.92367	0.312203	TMEM59	4.54159	3.71245	3.30807	3.73972
NM_001306140	-0.65479	3.17735	0.334989	QDPR	3.37815	3.47484	2.27915	3.15626
NM_001308068	-0.674134	3.53107	0.387957	FLYWCH1	3.12365	4.23235	3.81321	1.60862
NM_001308208	-0.839902	4.5606	0.299126	ARHGAP39	3.44155	5.60449	4.71029	2.79908
NM_001308258	-0.95399	4.866	0.161821	HPS3	5.75553	4.46685	3.58938	4.77614
NM_001308348	-0.643767	2.12264	0.383312	ZNF433	2.34271	2.30944	1.25388	2.04127
NM_001308375	-0.734683	4.04707	0.322942	ANKMY1	3.62752	4.80685	4.25606	2.32331
NM_001345	-0.853335	3.52427	0.217047	DGKA	3.41653	4.17293	3.47754	2.21701
NM_001361	-0.969913	2.2956	0.301473	DHODH	2.11277	2.94593	2.49558	-1.38297
NM_001365	-0.65838	3.2423	0.393339	DLG4	2.541	4.04623	3.38758	1.8411
NM_001394	-1.52066	4.73329	0.0340984	DUSP4	4.4397	5.80369	4.30603	2.83547
NM_001398	-0.672683	2.12002	0.372347	ECH1	1.98241	2.58486	2.17544	0.702784
NM_001423	-0.955891	6.93311	0.11889	EMP1	7.13089	7.50269	6.68258	5.97612
NM_001430	-0.828398	8.00654	0.173115	EPAS1	8.36134	8.35877	7.74938	7.27467
NM_001449	-1.0446	4.53662	0.0817861	FHL1	4.83394	5.04501	4.11368	3.6404
NM_001498	-0.688085	5.04679	0.234749	GCLC	5.50852	5.14114	4.69786	4.59701
NM_001512	-1.00252	2.1227	0.185194	GSTA4	2.49392	2.38991	0.952997	1.8411
NM_001545	-0.668517	2.40066	0.381771	ICT1	2.63077	2.58486	2.52401	0.852309
NM_001552	-1.61429	3.87748	0.0281538	IGFBP4	3.6915	4.91052	3.37202	1.8411
NM_001640	-0.992296	2.52663	0.158711	APEH	2.67365	3.01523	2.27915	1.22566
NM_001718	-1.02697	10.4739	0.0943409	BMP6	10.8794	10.9154	9.66539	10.0502
NM_001752	-0.867695	4.11207	0.160268	CAT	4.68471	4.1805	3.53454	3.6404
NM_001784	-1.00478	1.99429	0.217474	ADGRE5	1.87628	2.60747	1.94255	-0.125535
NM_001814	-0.844075	6.28803	0.155876	CTSC	6.85633	6.39249	5.76714	5.83052
NM_001831	-0.794586	3.57098	0.248684	CLU	4.31659	3.24894	2.70872	3.39436
NM_001863	-0.636613	1.38151	0.423793	COX6B1	1.76172	1.20342	1.32023	0.130152
NM_001870	-0.768626	1.37443	0.330147	CPA3	1.83909	1.20342	0.866834	0.702784
NM_001909	-0.600431	3.24744	0.395162	CTSD	3.12365	3.74341	3.37202	2.04127
NM_001931	-0.612755	4.03603	0.32291	DLAT	4.33674	4.22505	3.97641	3.26696
NM_001947	-1.24955	1.52572	0.151188	DUSP7	1.40254	2.19464	1.25388	-0.833479
NM_002039	-0.819971	7.81614	0.173376	GAB1	8.17665	8.15605	7.47778	7.20164
NM_002069	-1.82311	5.62244	0.00216964	GNAI1	6.41953	6.05678	4.48299	4.36781
NM_002133	-1.02858	3.31567	0.107497	HMOX1	3.71222	3.6701	2.68374	2.64363
NM_002203	-1.59501	7.19889	0.0118477	ITGA2	7.71576	7.84479	6.58981	5.62244
NM_002213	-1.23735	5.61995	0.0526271	ITGB5	5.69177	6.41349	5.3213	4.16833
NM_002310	-0.744266	5.49512	0.230988	LIFR	6.2756	5.1177	4.93334	5.18846
NM_002335	-0.767793	6.19422	0.229651	LRP5	5.95772	6.92423	6.11894	5.25713
NM_002350	-1.79299	5.74409	0.00239944	LYN	6.4476	6.27908	4.4611	4.67938
NM_002398	-0.804941	6.37283	0.175866	MEIS1	6.86791	6.54232	5.76714	6.03987
NM_002405	-1.13023	4.83243	0.0814837	MFNG	4.62041	5.71535	4.52579	3.59867
NM_002430	-0.721013	3.93167	0.343907	MN1	3.61657	4.63038	4.18663	2.04127
NM_002508	-0.984243	5.07874	0.0881319	NID1	5.51148	5.43466	4.42387	4.55399
NM_002516	-0.766316	3.41272	0.266222	NOVA2	3.15425	4.09506	3.32432	2.37366
NM_002518	-0.85553	7.9472	0.198497	NPAS2	7.5552	8.80336	7.76807	7.05315
NM_002528	-0.683112	2.15112	0.350937	NTHL1	2.20335	2.5148	1.44441	1.91096
NM_002610	-0.648524	4.5245	0.284735	PDK1	4.93432	4.64138	3.85857	4.39244
NM_002633	-1.54901	3.38756	0.0231437	PGM1	3.90448	3.90731	2.82753	1.60862
NM_002731	-0.735008	8.15351	0.300199	PRKACB	9.00042	7.63447	6.95993	8.24187
NM_002736	-1.49565	5.96276	0.0148547	PRKAR2B	6.84933	6.0792	4.77677	5.23005
NM_002752	-0.629831	5.24174	0.287404	MAPK9	5.2639	5.72055	5.12184	4.58637
NM_002758	-1.67167	4.13081	0.0112913	MAP2K6	4.10576	5.12164	3.22392	2.79908
NM_002775	-1.17827	6.68923	0.050172	HTRA1	7.02415	7.27618	6.14663	5.78473
NM_002862	-0.69201	5.07671	0.290796	PYGB	4.88956	5.72314	5.20321	3.81453
NM_002867	-1.29513	4.21852	0.0387382	RAB3B	4.30981	4.99871	3.56222	3.21267
NM_002892	-0.690959	5.93116	0.231828	ARID4A	6.38124	6.05678	5.59694	5.47457
NM_002902	-0.667032	4.44396	0.289519	RCN2	5.1279	4.15001	3.84736	4.23794
NM_002945	-0.699669	4.05544	0.291972	RPA1	3.82112	4.71091	4.04667	3.03636
NM_002959	-0.948074	2.36281	0.170735	SORT1	2.58658	2.75657	1.76337	1.69035
NM_002977	-1.26028	2.53652	0.0825291	SCN9A	2.31589	3.38606	1.76337	1.60862
NM_002979	-0.74484	4.649	0.21512	SCP2	5.15085	4.73164	4.05644	4.35534
NM_003022	-0.95925	6.5767	0.109894	SH3BGRL	7.17912	6.73179	5.90863	6.11209
NM_003033	-0.609267	7.48698	0.324715	ST3GAL1	7.47793	7.99063	7.47778	6.71772
NM_003071	-1.10795	4.75412	0.0692104	HLTF	5.51737	4.75209	3.93466	4.2105
NM_003078	-0.848687	2.73673	0.261312	SMARCD3	2.60885	3.34628	2.75742	1.11162
NM_003098	-0.743098	2.09177	0.315457	SNTA1	1.87628	2.65167	1.8998	1.11162
NM_003104	-1.3682	3.25737	0.0529856	SORD	3.49034	3.92543	2.89439	1.42981
NM_003132	-0.702792	1.95122	0.403669	SRM	1.18269	2.71552	2.02443	0.347273
NM_003189	-0.661878	4.53852	0.290029	TAL1	4.47649	5.08181	4.53978	3.59867
NM_003196	-0.703397	1.48009	0.375791	TCEA3	1.05877	2.06991	1.0343	0.852309
NM_003255	-0.784258	5.3915	0.210652	TIMP2	5.12404	6.13863	5.25924	4.50965
NM_003291	-0.663924	7.46065	0.35787	TPP2	8.32355	6.79473	6.22014	7.62832
NM_003335	-1.02856	3.3702	0.130992	UBA7	4.04174	3.38606	2.2454	3.09756
NM_003486	-0.668305	4.06024	0.357299	SLC7A5	3.37815	4.89222	4.16873	2.83547
NM_003492	-0.60978	1.75292	0.415487	TMEM187	1.5479	2.19464	1.61269	0.852309
NM_003500	-1.04433	0.865513	0.204775	ACOX2	1.12206	1.01327	0.336278	-0.436511
NM_003583	-0.60235	2.477	0.392762	DYRK2	2.49392	2.83532	2.21085	1.91096
NM_003588	-0.957754	5.38458	0.113569	CUL4B	6.00255	5.5026	4.4087	5.13838
NM_003595	-0.758893	4.66627	0.268732	TPST2	4.12906	5.50561	4.67269	3.53373
NM_003621	-1.39944	3.46344	0.123718	PPFIBP2	4.71582	2.25318	1.18434	3.26696
NM_003627	-1.47445	3.4154	0.0299216	SLC43A1	3.51413	4.23235	2.78117	1.97758
NM_003634	-0.63641	3.63941	0.313838	NIPSNAP1	3.59442	4.13452	3.24115	3.26696
NM_003647	-0.772901	5.06626	0.240307	DGKE	5.89568	4.6025	4.08534	5.00898
NM_003754	-0.925499	4.87676	0.186185	EIF3F	5.90246	4.02958	3.99683	4.59701
NM_003781	-1.28649	3.54497	0.116714	B3GALNT1	4.6689	2.75657	1.66469	3.34474
NM_003814	-0.604033	1.99706	0.410918	ADAM20	1.72141	2.5148	1.61269	1.52198
NM_003822	-0.805027	6.47334	0.1759	NR5A2	7.00013	6.60267	5.97191	6.04765
NM_003851	-0.895352	1.23543	0.275755	CREG1	1.76172	1.01327	0.952997	-0.125535
NM_003872	-0.773748	9.06366	0.208333	NRP2	9.64734	9.09727	8.66084	8.58747
NM_003873	-1.23923	8.92184	0.0423835	NRP1	9.33272	9.48545	8.12257	8.21968
NM_003884	-0.976235	5.04227	0.101252	KAT2B	5.46341	5.40592	4.07577	4.76675
NM_003896	-1.86435	3.60525	0.0160844	ST3GAL5	3.19896	4.78718	2.87244	1.42981
NM_003955	-1.04907	1.15688	0.229933	SOCS3	1.5479	1.20342	1.0343	-1.38297
NM_003959	-0.703245	5.69868	0.238209	HIP1R	5.55799	6.33605	5.43046	5.14564
NM_003995	-1.06155	2.38714	0.154945	NPR2	2.26072	3.08135	2.10191	0.987781
NM_004044	-0.635744	3.39253	0.318294	ATIC	3.6915	3.58149	2.87244	3.12721
NM_004047	-0.658343	1.74982	0.390943	ATP6V0B	2.23232	1.52184	1.55875	0.852309
NM_004055	-0.704614	3.32663	0.288356	CAPN5	3.28444	3.84206	3.22392	2.42231
NM_004064	-0.609086	4.68716	0.421499	CDKN1B	5.59192	3.75358	3.37202	4.9186
NM_004095	-0.781419	3.31071	0.36198	EIF4EBP1	1.98241	4.33755	3.44817	1.60862
NM_004121	-1.45086	4.18822	0.0620163	GGT5	3.25651	5.41236	3.69317	2.602
NM_004126	-1.05367	6.39999	0.184159	GNG11	7.49446	5.55007	4.56736	6.42423
NM_004170	-1.14959	4.76876	0.0554579	SLC1A1	4.92104	5.45351	4.23041	3.86819
NM_004177	-0.773742	6.66939	0.212749	STX3	7.39227	6.46083	6.11427	6.33175
NM_004186	-0.625451	5.23477	0.366585	SEMA3F	4.36318	6.1289	5.23365	4.39244
NM_004242	-1.09553	4.42075	0.0863926	HMGN3	5.19567	4.37757	3.3563	4.06488
NM_004252	-1.01072	2.19705	0.164727	SLC9A3R1	2.01612	2.89169	1.50271	1.52198
NM_004257	-1.22126	5.77238	0.0411624	TGFBRAP1	6.08626	6.39086	5.3334	4.62845
NM_004260	-0.800908	2.09528	0.326599	RECQL4	1.5479	2.83532	2.13914	0.347273
NM_004283	-0.683517	2.29058	0.394507	RAB3D	1.63727	3.03204	2.40677	0.702784
NM_004297	-0.861083	3.62239	0.196383	GNA14	3.52587	4.27535	3.46293	2.55913
NM_004311	-0.853696	3.15952	0.22656	ARL3	3.1081	3.75358	3.15288	1.69035
NM_004365	-0.631055	3.44559	0.421233	CETN3	4.31659	2.58486	2.2454	3.59867
NM_004375	-0.915632	1.8164	0.230617	COX11	2.44526	1.61407	0.775198	1.52198
NM_004447	-0.662637	6.56754	0.294711	EPS8	7.27621	6.26315	5.89236	6.44498
NM_004509	-0.832175	3.62796	0.191999	SP110	4.24732	3.57002	3.07816	3.15626
NM_004526	-0.847708	2.39299	0.221663	MCM2	2.85224	2.46614	1.94255	1.69035
NM_004572	-0.634241	3.10992	0.328978	PKP2	3.39106	3.29147	2.93729	2.42231
NM_004629	-0.715559	2.54117	0.300693	FANCG	2.83345	2.73619	1.98407	2.16078
NM_004664	-1.07354	3.47265	0.0986346	LIN7A	3.93123	3.8034	2.52401	3.03636
NM_004672	-0.681803	1.56218	0.382919	MAP3K6	1.59328	1.85992	1.11127	0.987781
NM_004696	-0.604531	3.95816	0.355007	SLC16A4	3.81155	4.50349	3.98666	3.03636
NM_004755	-0.607802	6.11416	0.386676	RPS6KA5	6.88169	5.6101	4.86831	6.32856
NM_004756	-0.669845	3.80817	0.392445	NUMBL	3.16931	4.61372	4.08534	1.97758
NM_004823	-0.715627	1.37222	0.3503	KCNK6	1.76172	1.26161	1.0343	0.535952
NM_004840	-1.08552	3.47751	0.172635	ARHGEF6	4.45821	2.91	1.66469	3.44233
NM_004863	-0.624389	6.15725	0.28881	SPTLC2	6.38447	6.4732	5.94588	5.64823
NM_005028	-0.650913	7.64121	0.273857	PIP4K2A	7.94087	7.91503	7.30732	7.24624
NM_005052	-0.648343	1.75544	0.401435	RAC3	1.40254	2.30944	1.50271	0.987781
NM_005063	-1.29505	4.88484	0.0300934	SCD	5.56655	5.14887	3.86969	4.26486
NM_005068	-2.14109	1.72785	0.00885858	SIM1	2.46979	2.03696	-0.297668	0.535952
NM_005077	-0.970425	6.80152	0.137409	TLE1	6.60264	7.62341	6.62305	5.68857
NM_005094	-0.785967	2.13869	0.347383	SLC27A4	1.50106	2.91	2.21085	0.347273
NM_005114	-1.0919	2.00949	0.165185	HS3ST1	2.77558	1.70076	1.61269	0.702784
NM_005127	-1.45211	3.90095	0.0992909	CLEC2B	5.18459	2.67326	1.71487	3.6404
NM_005229	-0.821087	1.59391	0.263463	ELK1	1.67995	1.93336	1.11127	0.852309
NM_005234	-0.695226	3.12877	0.396852	NR2F6	2.31589	3.97844	3.37202	1.22566
NM_005258	-0.611916	1.53126	0.431309	GCHFR	1.50106	1.82174	1.32023	0.702784
NM_005358	-0.64935	7.04056	0.278191	LMO7	7.47641	7.15763	6.49964	6.83466
NM_005388	-0.687647	4.33317	0.284206	PDCL	5.0446	4.00424	3.62918	4.18253
NM_005415	-0.669752	6.64225	0.265165	SLC20A1	7.07	6.78484	5.99748	6.49132
NM_005434	-0.691327	5.41512	0.240716	MALL	5.67868	5.74115	4.65994	5.3098
NM_005443	-0.872862	6.81235	0.166553	PAPSS1	7.59339	6.59703	6.05462	6.52234
NM_005447	-0.731472	5.24633	0.324616	RASSF9	6.17847	4.4419	3.82469	5.41571
NM_005458	-0.929373	5.4749	0.227594	GABBR2	4.1894	6.60548	5.35334	4.30434
NM_005482	-1.11494	4.93627	0.0690222	PIGK	5.64675	5.03253	3.85857	4.57566
NM_005501	-1.0392	4.27782	0.0956993	ITGA3	4.55312	4.79212	4.00694	3.12721
NM_005504	-0.68316	8.10585	0.276024	BCAT1	8.72174	8.00081	7.43725	7.96131
NM_005505	-1.14337	3.65748	0.130401	SCARB1	3.01113	4.67923	3.41819	2.16078
NM_005541	-1.11424	5.47009	0.125921	INPP5D	4.83865	6.51567	5.34937	3.86819
NM_005573	-0.670394	5.22954	0.245685	LMNB1	5.37199	5.64331	4.94915	4.72857
NM_005574	-1.05788	4.81901	0.115898	LMO2	5.81897	4.2396	3.88072	4.42861
NM_005576	-0.674156	1.52972	0.378002	LOXL1	1.59328	1.78253	1.25388	0.702784
NM_005583	-1.49424	1.73912	0.0446147	LYL1	1.98241	2.30944	0.775198	0.535952
NM_005630	-1.02779	1.73611	0.169464	SLCO2A1	2.1436	1.89711	1.32023	0.535952
NM_005668	-1.0851	7.51541	0.221134	ST8SIA4	8.71694	6.24523	5.23365	7.61922
NM_005688	-0.652068	4.87048	0.295153	ABCC5	4.67946	5.49352	4.86831	3.96989
NM_005723	-0.928194	8.4155	0.155403	TSPAN5	8.25594	9.20106	8.23862	7.39076
NM_005779	-0.685794	7.73958	0.322333	LHFPL2	7.27969	8.53464	7.84403	6.60369
NM_005786	-1.57432	5.68272	0.00718922	TSHZ1	6.26162	6.24343	4.78266	4.56487
NM_005797	-0.883473	3.41089	0.244064	MPZL2	4.33005	2.75657	2.17544	3.34474
NM_005808	-1.25686	6.95221	0.0367967	CTDSPL	7.29607	7.5769	6.03005	6.32856
NM_005810	-1.9582	1.08916	0.0291523	KLRG1	1.91253	1.01327	-1.06833	0.130152
NM_005811	-0.658261	2.08213	0.379996	GDF11	1.94789	2.53853	2.02443	0.987781
NM_005836	-0.815573	2.07722	0.251886	HRSP12	2.08127	2.53853	1.66469	1.33134
NM_005842	-0.969838	1.73771	0.186915	SPRY2	2.01612	2.00325	1.38365	0.535952
NM_005896	-1.15036	4.68022	0.120243	IDH1	5.69957	4.15769	3.01946	4.55399
NM_005907	-0.845527	5.28124	0.15627	MAN1A1	5.79733	5.44412	4.40106	5.09402
NM_005915	-0.635223	3.3147	0.334444	MCM6	3.93123	3.04867	2.87244	2.97246
NM_005924	-0.95135	5.17986	0.195944	MEOX2	6.22425	4.32396	3.83607	5.12375
NM_005957	-0.704025	4.00407	0.246851	MTHFR	4.35002	4.21772	3.70563	3.44233
NM_005983	-1.21595	4.74091	0.0458966	SKP2	5.5291	4.78222	4.03684	3.93678
NM_006006	-0.783136	4.04515	0.216002	ZBTB16	4.67946	3.94332	3.37202	3.75879
NM_006033	-0.966358	5.39955	0.222338	LIPG	4.44589	6.47166	5.48209	3.5557
NM_006044	-0.649588	2.37209	0.37295	HDAC6	2.01612	2.981	2.27915	1.42981
NM_006054	-0.811158	5.21519	0.165339	RTN3	5.33908	5.73603	4.92803	4.52086
NM_006076	-1.29446	3.47829	0.0801268	AGFG2	3.0765	4.46685	3.13456	1.8411
NM_006111	-0.672854	3.87591	0.286672	ACAA2	4.48854	3.69143	3.43326	3.51142
NM_006182	-0.729268	7.05477	0.217872	DDR2	7.31058	7.42763	6.66991	6.61158
NM_006185	-0.605726	6.24991	0.309079	NUMA1	6.37151	6.64564	6.13285	5.64311
NM_006225	-1.0515	2.54124	0.133886	PLCD1	2.9773	2.79648	2.13914	1.42981
NM_006243	-1.37683	5.80197	0.0185224	PPP2R5A	6.22425	6.41189	5.09367	4.77614
NM_006249	-0.671146	1.47876	0.395422	PRB3	1.80092	1.47341	0.572366	1.33134
NM_006285	-0.758416	1.18631	0.360993	TESK1	1.35064	1.31755	1.11127	-0.436511
NM_006307	-0.820674	5.47658	0.198912	SRPX	5.2498	6.22343	5.41156	4.4046
NM_006329	-1.01885	1.95036	0.232231	FBLN5	2.90717	1.07948	0.677344	1.69035
NM_006342	-0.72446	4.56898	0.244626	TACC3	4.49453	5.16039	4.4611	3.72039
NM_006343	-0.689292	7.31693	0.296029	MERTK	7.02725	8.0351	7.3605	6.30605
NM_006366	-0.639167	3.69993	0.318111	CAP2	4.19677	3.65932	3.20649	3.41854
NM_006404	-1.19512	2.00984	0.112081	PROCR	2.08127	2.60747	1.50271	0.702784
NM_006417	-0.760517	4.23078	0.385533	IFI44	5.28479	2.94593	2.2454	4.52086
NM_006516	-0.829559	3.48399	0.218211	SLC2A1	3.41653	4.09506	3.37202	2.37366
NM_006554	-0.725043	7.38935	0.226949	MTX2	7.90758	7.4668	7.03962	6.91548
NM_006613	-0.652242	5.91747	0.43079	GRAP	5.00737	6.8396	6.31267	3.77761
NM_006623	-1.41627	3.16747	0.0718436	PHGDH	2.58658	4.24682	2.75742	1.33134
NM_006634	-1.07219	3.49687	0.106394	VAMP5	3.84006	3.9344	3.22392	2.21701
NM_006653	-1.07704	1.64327	0.150151	FRS3	1.83909	2.03696	1.11127	0.535952
NM_006698	-0.723733	4.73823	0.320432	BLCAP	4.54159	5.39946	5.00064	2.90559
NM_006709	-0.98753	1.85145	0.177092	EHMT2	1.94789	2.30944	1.38365	0.852309
NM_006733	-0.640666	4.78362	0.275415	CENPI	4.94749	5.15272	4.24756	4.56487
NM_006736	-0.641433	1.987	0.383154	DNAJB2	1.98241	2.33676	1.76337	1.22566
NM_006751	-1.24205	7.99969	0.090625	SSFA2	9.1203	7.34003	6.62305	7.68175
NM_006769	-0.983952	4.29236	0.117951	LMO4	5.06488	4.14229	3.74239	3.6404
NM_006817	-0.61297	3.2744	0.338243	ERP29	3.58322	3.42478	2.916	2.87095
NM_006844	-0.783913	2.05572	0.295491	ILVBL	1.98241	2.53853	1.98407	0.702784
NM_006860	-0.809424	3.14445	0.257507	IFT27	3.06043	3.73316	3.17097	1.69035
NM_006862	-0.847932	1.94167	0.243663	TDRKH	2.23232	2.16445	1.18434	1.52198
NM_006875	-0.802745	0.989077	0.320083	PIM2	1.24087	1.01327	0.775198	-0.436511
NM_006877	-1.12917	4.73577	0.0718597	GMPR	5.54938	4.66313	3.75444	4.2913
NM_006895	-1.29889	4.40015	0.0367686	HNMT	5.2103	4.45443	3.58938	3.57735
NM_006931	-0.621431	3.43917	0.416377	SLC2A3	4.13674	3.03204	2.02443	3.68095
NM_006949	-0.60019	2.03839	0.426507	STXBP2	2.56397	1.74222	1.76337	1.42981
NM_006982	-0.620934	4.48756	0.418045	ALX1	5.31219	3.82286	2.89439	4.79473
NM_007013	-0.627071	7.08853	0.29475	WWP1	7.1976	7.5147	6.90559	6.54723
NM_007034	-0.673628	6.19132	0.334647	DNAJB4	6.85865	5.97869	4.7226	6.42721
NM_007047	-0.737947	1.22531	0.355048	BTN3A2	1.24087	1.52184	0.459146	0.852309
NM_007110	-0.616692	5.15074	0.286624	TEP1	5.31896	5.5026	4.95438	4.61805
NM_007144	-0.692372	3.84927	0.35821	PCGF2	3.24233	4.65772	4.04667	2.27114
NM_007175	-0.843609	2.88658	0.233613	ERLIN2	3.52587	2.75657	1.94255	2.68409
NM_007176	-0.92886	3.42968	0.232756	C14orf1	4.4083	2.65167	2.13914	3.34474
NM_007186	-0.762245	4.50058	0.211472	CEP250	4.50644	5.06148	4.29782	3.73972
NM_007257	-0.874754	1.93288	0.273035	PNMA2	1.45264	2.67326	1.71487	0.702784
NM_007315	-1.4984	5.88622	0.026684	STAT1	7.02828	5.42515	4.61439	5.20941
NM_007347	-0.89495	5.15074	0.124783	AP4E1	5.58912	5.43782	4.806	4.4046
NM_012096	-0.647097	4.63756	0.274224	APPL1	5.04868	4.75209	4.2043	4.31726
NM_012133	-0.649508	3.83152	0.311242	COPG2	4.45821	3.59287	3.50632	3.36976
NM_012142	-0.697593	2.70277	0.390793	CCNDBP1	3.56056	1.89711	1.44441	2.79908
NM_012160	-0.645676	6.49396	0.286002	FBXL4	7.079	6.39249	6.02509	6.22952
NM_012173	-0.608969	4.78444	0.313163	FBXO25	4.84804	5.20926	4.74693	4.01816
NM_012213	-0.777667	2.63113	0.253243	MLYCD	3.1081	2.65167	2.2454	1.97758
NM_012214	-0.930187	7.20003	0.132208	MGAT4A	7.19023	7.89907	6.8797	6.39405
NM_012288	-0.967621	7.39944	0.172911	TRAM2	7.38181	8.12357	7.46958	5.65842
NM_012338	-0.974556	4.57842	0.11852	TSPAN12	4.38914	5.3733	4.11368	3.85053
NM_012383	-0.726137	5.80348	0.208591	OSTF1	6.20428	6.01509	5.52139	5.23687
NM_012419	-0.689657	5.35624	0.285956	RGS17	4.91658	6.13085	5.34141	4.42861
NM_012450	-0.691142	3.89408	0.399513	SLC13A4	3.12365	4.75715	4.2043	1.8411
NM_012472	-0.817429	3.56573	0.198045	LRRC6	3.68103	4.05448	2.99936	3.12721
NM_013249	-1.07714	2.52963	0.124583	ZNF214	3.16931	2.53853	1.85574	1.76769
NM_013250	-0.618584	3.09694	0.343749	ZNF215	3.54909	3.0651	2.57924	2.83547
NM_013302	-0.625258	5.14378	0.326956	EEF2K	4.75627	5.85657	5.16761	4.25146
NM_013337	-0.61016	2.01219	0.40975	TIMM22	2.31589	2.03696	1.8998	1.11162
NM_013402	-0.81425	4.61315	0.171319	FADS1	4.81969	5.05738	4.34639	3.86819
NM_014028	-0.993963	3.0123	0.137608	OSTM1	3.64916	3.01523	2.37591	2.37366
NM_014051	-0.945726	2.80475	0.183367	TMEM14A	3.53753	2.58486	1.94255	2.42231
NM_014059	-1.0776	6.77772	0.115637	RGCC	7.76987	6.29658	5.64626	6.50268
NM_014079	-1.01826	1.43716	0.207622	KLF15	1.91253	1.47341	0.201964	1.11162
NM_014140	-0.696085	5.17503	0.241303	SMARCAL1	5.17343	5.71275	5.03067	4.45224
NM_014174	-1.39084	2.51332	0.0763678	THYN1	3.58322	1.82174	1.61269	1.52198
NM_014177	-0.724821	3.20918	0.302323	TIMM21	3.81155	3.0651	2.13914	3.21267
NM_014180	-0.850872	5.02694	0.14176	MRPL22	5.39139	5.36005	4.51874	4.53199
NM_014187	-0.729758	1.50279	0.380865	TMEM208	1.35064	1.93336	1.50271	-0.125535
NM_014203	-0.673665	3.19348	0.419994	AP2A1	2.3949	4.02958	3.492	1.11162
NM_014214	-0.928084	2.1807	0.210551	IMPA2	1.91253	2.87314	1.85574	1.11162
NM_014222	-0.675777	3.58058	0.295252	NDUFA8	3.95749	3.71245	3.492	2.72345
NM_014232	-0.889205	2.00627	0.242477	VAMP2	2.3949	2.13362	1.8103	0.702784
NM_014239	-0.980694	4.42303	0.0987951	EIF2B2	4.85737	4.75715	3.85857	3.79619
NM_014240	-0.737156	5.59279	0.227126	LIMD1	5.44497	6.25242	5.44911	4.81309
NM_014262	-0.871852	3.14204	0.187019	P3H3	3.0765	3.76368	2.73328	2.42231
NM_014297	-0.713114	3.13418	0.317296	ETHE1	2.71529	3.85156	3.13456	1.97758
NM_014312	-0.655094	3.27249	0.304876	VSIG2	3.31184	3.70198	2.89439	2.83547
NM_014339	-0.726256	3.83224	0.24701	IL17RA	4.06608	4.16533	3.70563	2.97246
NM_014384	-0.644304	2.47419	0.363197	ACAD8	2.26072	3.01523	2.21085	1.8411
NM_014399	-1.85086	3.86995	0.00785527	TSPAN13	4.99897	3.63751	2.52401	2.72345
NM_014456	-0.946695	5.54875	0.135856	PDCD4	6.42268	5.1944	4.7226	5.21632
NM_014465	-0.871036	7.4529	0.295328	SULT1B1	8.52979	6.37282	5.54932	7.64891
NM_014505	-0.675207	3.0862	0.3217	KCNMB4	3.12365	3.51127	3.0393	2.10226
NM_014521	-0.870822	7.5858	0.199549	SH3BP4	7.59478	8.24032	7.64889	6.13416
NM_014550	-1.35315	3.99748	0.0428788	CARD10	3.84944	4.9241	3.41819	2.76176
NM_014583	-2.29806	4.7422	0.00178097	LMCD1	6.11182	4.1805	2.99936	3.29336
NM_014585	-1.57108	4.10027	0.18724	SLC40A1	5.56939	1.52184	0.0538496	4.00225
NM_014598	-0.677856	3.52558	0.344708	SOCS7	3.01113	4.2824	3.57586	2.37366
NM_014600	-1.84248	2.37724	0.0196774	EHD3	3.50228	1.89711	1.25388	0.852309
NM_014606	-0.821748	5.85404	0.174655	HERC3	6.48419	5.84472	4.96997	5.69848
NM_014661	-1.01243	6.09744	0.213044	FAM53B	5.12017	7.20103	6.17155	4.16833
NM_014686	-0.600007	6.59375	0.355513	KIAA0355	6.23682	7.29022	6.63775	5.73745
NM_014704	-0.736172	4.28247	0.263	CEP104	3.86802	5.05327	4.15061	3.44233
NM_014718	-0.668831	2.52595	0.386877	CLSTN3	2.08127	3.19023	2.65831	0.987781
NM_014723	-0.729596	4.52436	0.298043	SNPH	3.90448	5.3766	4.57417	3.34474
NM_014726	-0.968366	2.87985	0.209722	TBKBP1	2.36904	3.74341	2.78117	1.33134
NM_014730	-0.642248	3.78356	0.333892	MLEC	3.56056	4.39067	3.80165	2.79908
NM_014746	-0.789475	5.40568	0.311044	RNF144A	4.43347	6.40545	5.58687	3.73972
NM_014762	-0.732304	4.65219	0.216368	DHCR24	5.04051	4.86432	4.06614	4.36781
NM_014831	-0.868015	4.37856	0.147124	TRANK1	4.82445	4.61929	3.81321	3.90289
NM_014840	-0.625598	7.72392	0.296014	NUAK1	8.07486	7.92294	7.48503	7.25634
NM_014865	-0.631069	4.02661	0.300088	NCAPD2	4.28237	4.2824	3.60277	3.70081
NM_014871	-0.622962	2.13892	0.371632	PAN2	2.31589	2.33676	1.85574	1.52198
NM_014898	-0.76827	3.34402	0.229456	ZFP30	3.67049	3.59287	3.07816	2.602
NM_014899	-0.780278	6.28076	0.280305	RHOBTB3	7.21585	5.5617	5.02571	6.35072
NM_014909	-0.906889	5.60885	0.224935	VASH1	5.08884	6.52609	5.74013	3.77761
NM_014911	-0.88971	7.52614	0.146395	AAK1	7.58569	8.15893	7.22853	6.7538
NM_014935	-0.761657	4.55103	0.291163	PLEKHA6	3.78246	5.46903	4.59442	3.31928
NM_014937	-0.687653	5.90623	0.277045	INPP5F	5.54938	6.64837	5.85369	5.06367
NM_014944	-0.616637	4.8228	0.311898	CLSTN1	4.5759	5.45663	4.65994	4.23794
NM_014960	-0.905679	3.00877	0.169765	ARSG	3.57193	3.04867	2.52401	2.32331
NM_014989	-0.796416	3.76815	0.390656	RIMS1	4.86664	2.28158	1.66469	4.04947
NM_015000	-0.830511	7.47849	0.241964	STK38L	8.42703	6.80333	6.35878	7.44622
NM_015016	-1.97539	1.57055	0.0315434	MAST3	1.72141	2.33676	0.866834	-2.28149
NM_015024	-0.619158	6.61966	0.29408	XPO7	6.87022	6.91293	6.34291	6.19843
NM_015036	-1.708	2.10407	0.0220195	ENDOD1	2.56397	2.62974	0.677344	1.11162
NM_015044	-0.75724	4.95418	0.212058	GGA2	5.00318	5.49048	4.86275	4.0339
NM_015049	-0.636419	6.07398	0.298818	TRAK2	6.69138	5.9053	5.51433	5.89226
NM_015141	-1.16264	2.91112	0.0901995	GPD1L	2.90717	3.62648	2.34437	1.91096
NM_015151	-0.649593	6.42478	0.3175	DIP2A	6.11377	7.12665	6.46157	5.49177
NM_015175	-0.707462	4.99002	0.33312	NBEAL2	4.12133	5.91892	5.11251	3.70081
NM_015196	-0.968199	6.34333	0.108059	KIAA0922	6.4383	6.99133	5.90863	5.62244
NM_015253	-0.866905	5.09341	0.208513	WSCD1	4.55312	5.99379	5.07937	3.79619
NM_015261	-0.750814	5.25534	0.193599	NCAPD3	5.69438	5.43466	4.81753	4.82219
NM_015279	-0.65741	2.95043	0.348089	TBC1D30	2.92502	3.39908	2.99936	1.76769
NM_015286	-1.12387	3.65222	0.0995871	SYNM	4.45821	3.53506	2.46658	3.31928
NM_015311	-0.879861	2.28431	0.242801	OBSL1	2.88909	2.13362	2.17544	0.852309
NM_015364	-0.866986	4.15971	0.160184	LY96	4.64217	4.35101	3.37202	3.86819
NM_015386	-0.652969	3.95165	0.293982	COG4	3.94879	4.4356	3.74239	3.34474
NM_015508	-0.769991	7.37409	0.349176	TIPARP	8.44995	6.08726	5.80528	7.56337
NM_015547	-1.38178	2.17487	0.0986335	ACOT11	1.59328	3.17517	1.71487	0.347273
NM_015600	-0.647231	4.78856	0.381492	ABHD12	4.14438	5.6101	5.05523	3.18474
NM_015627	-0.978186	4.25419	0.255433	LDLRAP1	3.25651	5.31953	4.4087	1.91096
NM_015650	-0.677781	4.85235	0.328416	TRAF3IP1	4.2041	5.69438	4.9439	3.70081
NM_015693	-0.862549	4.29845	0.150002	INTU	4.6636	4.61929	3.86969	3.68095
NM_015697	-0.626005	2.73089	0.368146	COQ2	3.29821	2.49068	2.27915	2.37366
NM_015983	-0.694145	1.82354	0.356255	UBE2D4	1.91253	2.10211	1.71487	0.702784
NM_016002	-0.630587	5.04639	0.27299	SCCPDH	5.2674	5.36005	4.67902	4.68935
NM_016059	-0.80766	2.20867	0.298893	PPIL1	1.63727	2.981	2.02443	1.11162
NM_016063	-0.916321	2.4472	0.27062	HDDC2	3.37815	1.65807	1.18434	2.32331
NM_016138	-0.649729	2.34818	0.353623	COQ7	2.69462	2.41577	1.71487	2.10226
NM_016173	-0.759428	3.22922	0.264792	HEMK1	2.96008	3.90731	3.0393	2.37366
NM_016206	-1.19051	4.63307	0.191298	VGLL3	5.86364	3.31913	2.13914	4.67938
NM_016215	-1.13225	8.70084	0.0805873	EGFL7	8.71726	9.49382	8.38141	7.54975
NM_016230	-0.630486	5.8247	0.312758	CYB5R4	6.56328	5.40915	5.18996	5.70341
NM_016245	-0.620146	3.74062	0.342051	HSD17B11	4.39555	3.41199	3.38758	3.34474
NM_016255	-1.03581	1.84298	0.173546	FAM8A1	2.36904	1.89711	0.775198	1.42981
NM_016377	-0.956557	4.68084	0.124443	AKAP7	5.45422	4.52146	4.02694	4.18253
NM_016429	-0.747359	2.00069	0.302716	COPZ2	2.49392	1.89711	1.44441	1.52198
NM_016466	-1.18639	1.14251	0.16767	ANKRD39	1.05877	1.70076	0.775198	-0.833479
NM_016524	-0.657078	1.95231	0.438375	SYT17	1.18269	2.69455	2.06369	0.347273
NM_016551	-0.766187	4.701	0.203731	TM7SF3	4.6689	5.29536	4.33841	4.154
NM_016619	-2.92948	1.89217	0.000478991	PLAC8	2.88909	2.10211	-0.297668	-0.436511
NM_016647	-0.816589	2.04964	0.250291	THEM6	2.28857	2.30944	1.61269	1.33134
NM_016656	-0.791785	6.37494	0.242058	RRAGB	7.22398	5.91212	5.3091	6.35072
NM_016848	-0.768565	4.41974	0.211439	SHC3	4.26845	5.08181	4.06614	3.85053
NM_017413	-1.15513	6.93442	0.265968	APLN	5.66014	8.15797	7.15091	3.12721
NM_017414	-0.738697	2.84207	0.268036	USP18	2.87078	3.30537	2.49558	2.21701
NM_017415	-0.791243	5.68922	0.189384	KLHL3	5.7329	6.26136	5.56651	4.78547
NM_017421	-0.993031	1.14411	0.257948	COQ3	1.63727	1.01327	0.952997	-0.833479
NM_017522	-0.78999	6.04038	0.235284	LRP8	5.72017	6.82158	6.06916	4.8402
NM_017592	-0.674438	1.40641	0.385835	MED29	1.45264	1.65807	1.0343	0.702784
NM_017694	-0.684184	3.95753	0.331849	MFSD6	4.75128	3.42478	2.97896	3.96989
NM_017734	-1.89404	7.78419	0.0196906	PALMD	9.15097	6.9642	5.61687	7.10436
NM_017742	-1.16766	5.5197	0.0456525	ZCCHC2	5.85668	6.08726	4.74089	4.87557
NM_017750	-0.6278	3.5372	0.333152	RETSAT	3.37815	4.09506	3.25817	3.03636
NM_017791	-0.958767	2.7633	0.159094	FLVCR2	2.73567	3.38606	2.17544	2.10226
NM_017839	-1.17818	8.27709	0.117242	LPCAT2	9.37879	7.59894	6.75032	8.08923
NM_017840	-0.962223	3.096	0.148451	MRPL16	3.75277	3.04867	2.49558	2.46937
NM_017857	-0.757789	2.24741	0.294473	SSH3	2.28857	2.67326	1.55875	1.91096
NM_017868	-1.19218	3.78737	0.0981236	TTC12	4.79563	3.27743	2.57924	3.39436
NM_017918	-0.925594	6.01381	0.112201	CCDC109B	6.28601	6.49762	5.53891	5.39758
NM_018004	-1.02915	3.34786	0.152177	TMEM45A	2.79513	4.2824	2.97896	2.32331
NM_018013	-0.638429	6.46617	0.27951	SOBP	6.73505	6.75603	5.97448	6.22952
NM_018060	-0.761318	3.82761	0.225034	IARS2	4.34339	3.87039	3.47754	3.24007
NM_018082	-0.778808	5.33641	0.176539	POLR3B	5.74802	5.57036	5.00569	4.74778
NM_018084	-0.607847	5.85264	0.290485	CCDC88A	6.08428	6.15023	5.37691	5.63281
NM_018089	-0.93293	2.20763	0.187448	ANKZF1	2.71529	2.25318	1.76337	1.33134
NM_018132	-0.603141	3.54144	0.42726	CENPQ	4.34339	2.85435	2.43699	3.68095
NM_018196	-0.742897	5.30487	0.197928	TMLHE	5.48464	5.73859	4.94915	4.79473
NM_018217	-0.691237	3.84975	0.26205	EDEM2	4.02528	4.21772	3.40296	3.46573
NM_018239	-1.35641	3.50719	0.0949517	LRRC20	2.73567	4.63589	3.22392	1.52198
NM_018252	-0.866053	4.44942	0.210091	TMEM206	4.03353	5.28837	4.43139	3.12721
NM_018279	-1.12772	2.12912	0.165589	TMEM19	2.94266	1.82174	0.572366	1.91096
NM_018287	-0.608469	6.75462	0.317896	ARHGAP12	7.26311	6.73565	6.1166	6.66309
NM_018346	-0.619999	2.96607	0.343819	RSAD1	3.04418	3.31913	2.80454	2.27114
NM_018369	-0.619545	4.92445	0.299868	DEPDC1B	5.29513	5.07372	4.1597	4.89294
NM_018416	-0.78777	2.45253	0.252917	FOXJ2	2.85224	2.56188	2.06369	1.76769
NM_018441	-1.42814	1.49761	0.0903988	PECR	2.11277	1.61407	-0.511826	1.11162
NM_018456	-0.987927	1.48388	0.236776	EAF2	1.40254	2.03696	0.201964	1.22566
NM_018469	-0.609355	5.03165	0.306153	TEX2	4.95185	5.56459	4.88484	4.44047
NM_018490	-1.70034	3.31098	0.00896953	LGR4	3.84944	3.87971	2.06369	2.27114
NM_018555	-0.621783	3.10523	0.34142	ZNF331	3.18421	3.47484	2.63243	2.79908
NM_018571	-0.627936	3.71802	0.348672	STRADB	4.38914	3.37292	3.0393	3.59867
NM_018660	-0.877658	2.51867	0.194749	ZNF395	2.92502	2.69455	2.02443	1.8411
NM_018676	-0.931824	5.24762	0.109332	THSD1	5.79247	5.43782	4.81178	4.56487
NM_018710	-1.06037	4.38097	0.106513	TMEM55A	5.27438	4.06269	3.43326	3.98616
NM_018719	-0.819258	4.95956	0.161549	CDCA7L	5.22479	5.36337	4.69786	4.2105
NM_018945	-1.08011	7.82669	0.0958067	PDE7B	8.6651	7.71152	6.79183	7.49537
NM_018982	-0.932354	3.13461	0.159498	YIPF1	3.24233	3.6701	2.75742	2.27114
NM_018988	-1.69718	7.07824	0.00580744	GFOD1	7.38826	7.93192	5.92737	6.04765
NM_019012	-0.655769	6.63249	0.266456	PLEKHA5	6.90099	6.93656	6.30245	6.22266
NM_019059	-0.769275	2.63158	0.275226	TOMM7	2.79513	2.981	2.52401	1.52198
NM_019086	-0.691212	3.20322	0.303517	VSIG10	2.88909	3.87039	2.85016	2.68409
NM_019103	-0.88899	2.56495	0.34396	ZMAT5	1.5479	3.52322	2.75742	-0.125535
NM_019117	-1.52017	7.02861	0.0322348	KLHL4	8.15506	6.65788	5.41915	6.52234
NM_019600	-0.769485	7.88421	0.253749	FAM214A	8.70246	7.47835	6.90424	7.84121
NM_020062	-0.700604	2.0963	0.361353	SLC2A4RG	1.83909	2.65167	2.06369	0.852309
NM_020163	-0.910443	2.64148	0.17763	SEMA3G	3.02775	2.87314	2.21085	1.8411
NM_020186	-1.10195	2.42138	0.130299	SDHAF3	2.17378	3.20513	1.94255	1.33134
NM_020196	-0.615649	1.99803	0.483299	XAB2	1.2968	2.69455	2.21085	0.130152
NM_020200	-0.954459	2.9096	0.153462	PRTFDC1	3.21356	3.27743	2.49558	2.04127
NM_020376	-0.626401	2.97734	0.348282	PNPLA2	3.28444	3.1133	2.85016	2.21701
NM_020382	-0.823305	4.71402	0.199686	SETD8	4.64217	5.36337	4.67269	3.5557
NM_020448	-0.963178	3.92471	0.124684	NIPAL3	4.23305	4.35101	3.62918	2.93941
NM_020452	-0.691492	4.4906	0.265474	ATP8B2	4.35661	5.09787	4.33038	3.77761
NM_020524	-1.296	3.06516	0.138703	PBXIP1	2.63077	4.03793	2.99936	0.130152
NM_020536	-0.770334	3.6436	0.217396	CSRP2BP	3.77263	4.09506	3.13456	3.21267
NM_020647	-0.609226	1.27748	0.441499	JPH1	1.24087	1.52184	1.18434	0.130152
NM_020676	-0.878234	2.91216	0.219997	ABHD6	2.9773	3.42478	2.87244	1.42981
NM_020698	-1.62751	6.02785	0.0162392	TMCC3	5.93587	7.0718	5.46019	4.26486
NM_020705	-0.869494	2.42826	0.346207	TBC1D24	1.5479	3.33277	2.60608	-0.125535
NM_020714	-0.704587	2.61608	0.314185	ZNF490	2.69462	2.99821	2.43699	1.76769
NM_020726	-0.708435	5.66647	0.219774	NLN	6.0803	5.8471	5.36517	5.14564
NM_020733	-0.697292	6.1381	0.245635	HEG1	6.71081	6.10327	5.61687	5.8573
NM_020779	-0.638711	5.20934	0.266222	WDR35	5.50556	5.45663	4.99557	4.66934
NM_020802	-0.676227	5.00764	0.241022	CEP126	5.43254	5.13726	4.68533	4.54303
NM_020814	-0.670367	6.49699	0.346938	2004-03-01	6.02962	7.28146	6.70758	5.09402
NM_020827	-0.666518	3.23092	0.308751	CFAP97	3.32535	3.61536	3.13456	2.37366
NM_020853	-1.07111	2.99713	0.122014	FAM234B	3.1081	3.59287	2.70872	1.69035
NM_020856	-1.4681	4.23484	0.0298196	TSHZ3	4.44589	5.01148	3.81321	2.42231
NM_020918	-0.666674	3.44711	0.360031	GPAM	4.26845	2.77666	2.63243	3.36976
NM_020944	-0.873612	5.33906	0.20761	GBA2	4.48854	6.34617	5.11718	4.45224
NM_020945	-0.944245	3.42091	0.15826	WDFY4	3.99178	3.52322	2.34437	3.21267
NM_021109	-0.715363	2.39587	0.336418	TMSB4X	3.04418	2.06991	1.50271	2.27114
NM_021120	-1.15909	1.59004	0.129986	DLG3	1.72141	2.06991	1.0343	0.347273
NM_021214	-0.769509	4.23782	0.300654	ABHD17C	3.61657	5.10186	4.37788	2.68409
NM_021222	-1.2944	1.63291	0.141353	PRUNE	1.72141	2.19464	1.44441	-1.38297
NM_021229	-0.901106	8.0308	0.187832	NTN4	8.93419	7.57976	6.99462	7.88851
NM_021626	-0.683461	2.15796	0.3521	SCPEP1	2.541	2.19464	1.18434	2.10226
NM_021629	-0.671311	6.97368	0.255934	GNB4	7.24635	7.2876	6.53674	6.65294
NM_021724	-0.859098	1.10228	0.292831	NR1D1	1.35064	1.20342	0.775198	-0.125535
NM_021922	-0.673034	1.48937	0.387265	FANCE	1.72141	1.56869	1.18434	0.702784
NM_022060	-0.759796	3.47027	0.249516	ABHD4	4.12133	3.27743	3.05886	2.93941
NM_022454	-0.845606	3.70622	0.23167	SOX17	4.5759	3.15995	2.82753	3.48875
NM_022477	-1.13007	3.53899	0.139641	NDRG3	3.02775	4.50349	3.40296	1.76769
NM_022492	-0.838133	1.74983	0.293074	TTC31	1.59328	2.28158	1.61269	0.347273
NM_022726	-0.960593	2.78315	0.149145	ELOVL4	3.21356	3.01523	2.21085	2.10226
NM_022733	-1.10911	3.38354	0.119744	SMAP2	3.19896	4.1955	3.15288	1.91096
NM_022745	-0.614897	4.27729	0.324868	ATPAF1	4.84336	4.13452	3.64221	4.154
NM_022751	-0.617829	2.72272	0.379436	GAREM	3.25651	2.53853	2.06369	2.55913
NM_022754	-0.826886	4.78148	0.165775	SFXN1	4.95619	5.26367	4.56051	3.95343
NM_022780	-0.647198	5.05639	0.270879	RMND5A	5.29513	5.36337	4.96997	4.31726
NM_022911	-0.873203	2.59872	0.235156	SLC26A6	2.11277	3.39908	2.27915	1.69035
NM_023037	-0.622002	6.28096	0.372104	FRY	7.03652	5.82556	5.03067	6.48561
NM_023075	-0.862028	3.43135	0.186832	MPPE1	3.82112	3.6808	3.25817	2.37366
NM_023110	-0.939709	4.98512	0.195132	FGFR1	4.5005	5.89614	5.04054	3.29336
NM_023925	-1.43953	5.35693	0.0152882	CAPRIN2	6.1331	5.59603	4.37788	4.52086
NM_023928	-0.709794	4.38226	0.330242	AACS	4.05801	5.09388	4.61439	2.68409
NM_024028	-0.783422	3.04217	0.258046	PCYOX1L	3.40385	3.23449	3.01946	1.76769
NM_024071	-0.785796	3.40728	0.326761	ZFYVE21	2.49392	4.3443	3.50632	1.8411
NM_024089	-0.717185	1.73033	0.34855	KDELC1	1.80092	2.03696	1.38365	0.987781
NM_024094	-0.806876	1.39903	0.311377	DSCC1	1.72141	1.47341	0.459146	1.11162
NM_024103	-1.10803	1.43429	0.189732	SLC25A23	1.50106	1.89711	1.25388	-0.833479
NM_024108	-0.926306	2.10949	0.286119	TRAPPC6A	1.94789	2.71552	2.21085	-0.436511
NM_024293	-0.686568	2.63296	0.312445	FAM134A	2.99431	2.73619	2.10191	2.27114
NM_024308	-0.673778	1.62531	0.445147	DHRS11	1.24087	2.16445	1.85574	-0.833479
NM_024313	-0.684129	1.30404	0.412453	NOL12	1.05877	1.74222	1.25388	-0.125535
NM_024545	-0.631169	5.24541	0.272947	SAP130	5.44497	5.58182	4.97512	4.78547
NM_024548	-0.655942	3.8818	0.301158	CEP97	4.01698	4.25401	3.86969	2.93941
NM_024561	-0.661905	5.79515	0.247407	NAA16	6.11377	6.04647	5.40393	5.43362
NM_024577	-1.56058	3.43759	0.0260687	SH3TC2	4.37621	3.38606	2.02443	2.72345
NM_024641	-1.13242	3.48358	0.100482	MANEA	4.29615	3.34628	2.40677	3.06728
NM_024712	-0.73345	1.75825	0.394584	ELMO3	1.12206	2.46614	1.85574	-0.125535
NM_024733	-0.645465	2.00614	0.388456	ZNF665	2.44526	1.89711	1.50271	1.60862
NM_024734	-1.16865	4.39783	0.0927765	CLMN	3.82112	5.4315	3.96608	3.29336
NM_024768	-0.766507	2.45905	0.318971	EFCC1	3.18421	2.03696	1.50271	2.32331
NM_024782	-0.673294	4.02929	0.323579	NHEJ1	3.51413	4.80196	4.01698	3.06728
NM_024806	-0.790402	3.73163	0.226932	C11orf63	4.31659	3.70198	2.916	3.53373
NM_024827	-0.679886	2.6567	0.34545	HDAC11	2.46979	3.20513	2.68374	1.42981
NM_024847	-1.02609	3.7784	0.117983	TMC7	4.56455	3.61536	2.97896	3.29336
NM_024864	-0.821231	1.76397	0.346945	MRM1	1.35064	2.41577	1.85574	-0.436511
NM_024869	-1.56829	1.70568	0.0441176	FAM110D	2.4203	1.78253	0.459146	0.702784
NM_024884	-0.65023	3.26448	0.324472	L2HGDH	3.15425	3.79358	2.97896	2.72345
NM_024954	-0.844128	6.0587	0.27163	UBTD1	5.06084	7.09599	6.14663	4.57566
NM_024956	-0.684032	5.05214	0.26111	TMEM62	5.70991	4.84542	4.39337	4.88428
NM_025081	-1.41173	3.39168	0.0296503	NYNRIN	3.96614	3.78368	2.63243	2.27114
NM_030625	-0.835734	2.50351	0.280931	TET1	3.31184	1.96873	1.50271	2.32331
NM_030626	-0.706189	3.79265	0.261817	LRRC27	3.96614	4.16533	3.64221	3.00476
NM_030630	-1.49747	2.08593	0.0370389	HID1	2.3949	2.65167	1.18434	0.852309
NM_030653	-0.789294	4.13548	0.207707	DDX11	4.15954	4.68987	3.94521	3.29336
NM_030767	-0.688986	4.93613	0.301595	AKNA	4.63133	5.64057	5.06009	3.68095
NM_030777	-0.666101	3.50945	0.343057	SLC2A10	3.57193	3.92543	3.6806	2.04127
NM_030796	-0.604558	7.49798	0.398746	VOPP1	7.15189	8.19484	7.78799	6.0242
NM_030802	-1.12317	4.02903	0.0677902	FAM117A	4.65292	4.21772	3.38758	3.26696
NM_030821	-1.00154	3.38498	0.118288	PLA2G12A	3.77263	3.73316	2.916	2.55913
NM_030973	-0.689082	3.59958	0.364464	MED25	2.90717	4.42926	3.76639	2.10226
NM_031232	-1.06409	2.79526	0.179406	NECAB3	2.58658	3.55846	2.75742	0.702784
NM_031415	-0.98751	2.73032	0.147031	GSDMC	3.27054	2.83532	2.27915	1.8411
NM_031910	-0.939681	1.95565	0.198873	C1QTNF6	2.3949	2.06991	1.18434	1.42981
NM_031915	-0.609013	3.90701	0.362444	SETDB2	4.54737	3.61536	3.05886	3.91994
NM_031924	-1.09302	1.59196	0.165936	RSPH3	1.45264	2.2242	1.11127	0.347273
NM_031953	-0.693518	6.42489	0.239329	SNX25	6.70952	6.74077	5.94325	6.11579
NM_032012	-0.689895	7.12394	0.260471	TMEM245	7.72279	7.04926	6.51034	6.93027
NM_032146	-1.10144	3.69846	0.079058	ARL6	4.27543	3.9164	3.0393	2.97246
NM_032147	-0.6739	1.08403	0.42197	USP44	1.2968	1.07948	1.0343	-0.436511
NM_032208	-0.687333	6.87996	0.256776	ANTXR1	7.18561	7.17193	6.80202	6.09343
NM_032233	-0.708455	6.66415	0.259562	SETD3	6.60264	7.26288	6.63124	5.76129
NM_032259	-0.611384	2.50536	0.459836	WDR24	1.35064	3.38606	2.52401	1.42981
NM_032294	-0.913507	2.25192	0.199845	CAMKK1	2.34271	2.71552	1.98407	1.11162
NM_032310	-1.05234	3.04064	0.129367	C9orf89	3.21356	3.58149	2.82753	1.60862
NM_032341	-0.766611	4.96786	0.186542	DDI2	5.16594	5.39622	4.63409	4.39244
NM_032361	-0.605137	1.25846	0.480654	THOC3	1.12206	1.56869	1.25388	-0.125535
NM_032385	-0.958028	3.03026	0.158265	FAXDC2	3.0765	3.61536	2.73328	1.97758
NM_032409	-1.0167	2.02584	0.162159	PINK1	2.56397	2.06991	1.32023	1.33134
NM_032437	-0.853752	3.60882	0.207794	EFCAB7	4.33674	3.38606	2.70872	3.39436
NM_032438	-0.760688	7.73037	0.21639	L3MBTL3	8.35106	7.69247	7.12678	7.45209
NM_032490	-0.795675	1.19275	0.313153	C14orf142	1.40254	1.31755	0.866834	0.130152
NM_032510	-0.682115	2.70751	0.49527	PARD6G	1.18269	3.69143	3.07816	-0.125535
NM_032530	-0.627783	2.74803	0.363118	ZNF594	3.21356	2.67326	2.31213	2.37366
NM_032679	-0.690955	1.7437	0.367841	ZNF577	2.01612	1.82174	1.66469	0.535952
NM_032689	-0.642218	2.26886	0.356272	ZNF607	2.34271	2.58486	2.06369	1.52198
NM_032709	-0.985324	3.60551	0.12576	PYROXD2	3.74274	4.17293	3.25817	2.64363
NM_032718	-0.767832	3.28583	0.237043	MFSD9	3.84944	3.23449	2.78117	2.83547
NM_032730	-1.00593	2.97083	0.128872	RTN4IP1	3.31184	3.34628	2.17544	2.46937
NM_032777	-0.70871	4.48141	0.277054	ADGRA2	4.24732	5.15272	4.4974	3.41854
NM_032801	-1.15856	7.26809	0.0556632	JAM3	7.92099	7.51096	6.43748	6.69562
NM_032806	-1.23443	1.76536	0.127156	POMGNT2	1.80092	2.36358	1.50271	-0.436511
NM_032852	-1.24408	4.68493	0.0363423	ATG4C	5.18459	5.12556	3.83607	3.98616
NM_032853	-0.896811	4.24545	0.243467	MUM1	3.52587	5.20185	4.33038	2.51495
NM_032866	-1.12575	6.71847	0.0718993	CGNL1	6.65707	7.54577	6.23096	5.826
NM_032950	-2.19	1.07962	0.0107017	MMP28	1.83909	1.20342	-0.763411	-0.436511
NM_033102	-0.890061	4.19242	0.179505	SLC45A3	3.84006	5.01148	3.99683	3.18474
NM_033117	-0.64887	4.34697	0.275169	RBM18	4.59833	4.63038	3.91333	4.01816
NM_033198	-0.929379	2.31255	0.193699	PIGS	2.36904	2.81603	2.06369	1.11162
NM_033219	-0.796045	1.46053	0.331563	TRIM14	1.50106	1.78253	1.38365	-0.125535
NM_033222	-0.666589	5.67459	0.250805	PSIP1	6.15028	5.7437	5.18552	5.39758
NM_033426	-0.630905	3.21909	0.351597	CIPC	3.85876	2.89169	2.916	2.72345
NM_033502	-0.754912	4.66875	0.255592	TRERF1	4.11357	5.51461	4.52579	3.83264
NM_033515	-1.33202	9.34494	0.0305796	ARHGAP18	9.91626	9.80454	8.36579	8.67665
NM_052817	-0.620107	5.31233	0.338653	MID2	4.92104	6.02563	5.4001	4.30434
NM_052831	-0.615213	3.29511	0.372288	SLC18B1	3.81155	3.19023	2.34437	3.34474
NM_052875	-1.13318	4.77443	0.0651714	VPS26B	4.90763	5.46284	4.4087	3.6404
NM_052928	-0.678834	2.95626	0.327956	SMYD4	2.9773	3.38606	2.95828	1.8411
NM_052950	-0.619439	5.9046	0.280007	WDFY2	6.14076	6.20687	5.50722	5.60147
NM_052954	-1.04506	6.35873	0.0827749	CYYR1	7.04164	6.46548	5.70331	5.77071
NM_053004	-1.01383	2.72083	0.299644	GNB1L	1.24087	3.83249	2.85016	-0.125535
NM_053024	-0.837134	4.73967	0.16681	PFN2	5.3978	4.67388	4.16873	4.31726
NM_053055	-0.659967	4.1045	0.280769	THEM4	4.60388	4.09506	3.74239	3.68095
NM_054027	-0.619547	5.72065	0.326667	ANKH	5.35233	6.42786	5.72796	4.88428
NM_057159	-0.996572	3.61444	0.17986	LPAR1	4.54737	3.08135	2.27915	3.48875
NM_058179	-1.1689	2.61056	0.149701	PSAT1	1.98241	3.58149	2.37591	0.852309
NM_058229	-1.16385	6.60795	0.138466	FBXO32	7.79981	5.52356	5.12648	6.41223
NM_080546	-0.786814	5.95914	0.204332	SLC44A1	6.63825	5.83756	5.04545	5.8573
NM_080592	-0.771714	2.55659	0.33162	ATRAID	3.16931	2.38991	1.0343	2.68409
NM_080683	-0.608417	3.03824	0.36864	PTPN13	3.40385	3.1133	2.27915	2.97246
NM_080752	-0.804829	2.41967	0.299319	ZSWIM3	2.08127	3.09741	2.43699	0.852309
NM_080873	-0.76322	2.27954	0.280848	ASB11	2.77558	2.2242	1.76337	1.76769
NM_130439	-1.03675	3.87877	0.0943401	MXI1	4.2402	4.30333	3.20649	3.26696
NM_130446	-0.744796	4.94939	0.200443	KLHL6	5.22839	5.28837	4.70409	4.2913
NM_130470	-0.671011	4.95107	0.25284	MADD	4.97346	5.45351	4.65352	4.4639
NM_133343	-0.615723	3.19041	0.37018	RAD17	3.81155	2.89169	2.55189	3.03636
NM_133373	-0.883371	3.06299	0.208512	PLCD3	2.9773	3.69143	2.95828	1.76769
NM_133443	-0.795797	3.06659	0.390162	GPT2	1.76172	4.07896	3.3404	0.535952
NM_138287	-0.747888	1.18093	0.366571	DTX3L	1.24087	1.42331	0.775198	0.347273
NM_138340	-0.804461	3.52344	0.222291	ABHD3	3.40385	4.15769	3.24115	2.76176
NM_138383	-0.915643	3.47565	0.190789	MTSS1L	3.12365	4.2824	3.27499	2.37366
NM_138387	-0.966425	1.18465	0.243299	G6PC3	1.18269	1.61407	0.201964	0.702784
NM_138410	-0.841547	5.98066	0.185537	CMTM7	5.74551	6.74842	5.85369	5.00099
NM_138420	-0.83737	4.22041	0.198973	AHNAK2	3.84944	5.02415	3.89167	3.51142
NM_138426	-0.638545	5.28028	0.267423	GLCCI1	5.6628	5.43466	4.92803	4.90155
NM_138432	-1.01893	1.92	0.194623	SDSL	1.94789	2.44117	1.76337	0.130152
NM_138443	-0.832586	3.77882	0.183994	HAUS1	4.03353	4.16533	3.46293	3.03636
NM_138453	-0.647191	3.12084	0.319494	RAB3C	3.40385	3.31913	2.63243	2.79908
NM_138466	-1.00525	1.65003	0.194428	ZNF837	1.94789	1.89711	1.38365	0.130152
NM_138554	-0.703748	5.04016	0.335601	TLR4	5.96421	4.21035	3.77824	5.17433
NM_138701	-0.851108	1.54487	0.268606	MPLKIP	1.91253	1.61407	0.866834	0.987781
NM_138786	-0.911398	6.22145	0.265094	TM4SF18	7.34332	4.99013	4.56736	6.31574
NM_138799	-0.630287	5.99015	0.279295	MBOAT2	6.32855	6.19758	5.4965	5.76129
NM_138809	-1.04498	1.87153	0.148066	CMBL	2.20335	2.16445	0.952997	1.33134
NM_138959	-1.25722	5.4183	0.0375985	VANGL1	5.97282	5.82314	5.01072	4.13952
NM_138961	-0.754795	4.03924	0.214859	ESAM	4.43347	4.2396	3.69317	3.46573
NM_139045	-0.753436	7.65163	0.246019	SMARCA2	8.26736	7.61507	6.56095	7.678
NM_144607	-1.21081	1.06808	0.164093	CYB5D1	1.24087	1.42331	0.775198	-1.38297
NM_144632	-1.01624	2.13412	0.179352	TMEM182	2.20335	2.65167	1.94255	0.535952
NM_144650	-0.63501	2.75995	0.367674	ADHFE1	3.42909	2.33676	2.27915	2.42231
NM_144718	-0.850192	4.3263	0.164793	SPICE1	4.53579	4.78222	4.13226	3.39436
NM_144999	-0.777687	2.10281	0.319902	LRRC45	1.35064	2.92808	1.61269	1.52198
NM_145021	-0.739753	6.08832	0.214077	2008-03-01	6.61094	6.16365	5.61026	5.7181
NM_145257	-0.707106	2.72122	0.29183	CCSAP	2.83345	3.09741	2.10191	2.42231
NM_145287	-0.613376	3.95895	0.318676	ZNF519	4.39555	3.98709	3.66791	3.51142
NM_145800	-1.06675	3.40417	0.122386	2006-09-01	3.15425	4.23235	3.05886	2.27114
NM_145810	-1.18483	1.40368	0.122967	CDCA7	1.72141	1.70076	0.677344	0.347273
NM_145866	-0.711399	1.67831	0.386834	FZD3	1.35064	2.2242	1.76337	-0.125535
NM_147128	-1.26832	4.45638	0.044888	ZNRF2	5.3324	4.37098	3.5205	3.79619
NM_147686	-1.26791	1.8232	0.092604	TRAF3IP2	2.08127	2.28158	1.38365	0.130152
NM_152238	-0.79752	6.29768	0.204591	SNX7	7.06397	6.02563	5.60694	6.03987
NM_152282	-0.643672	1.45081	0.448573	PXYLP1	1.05877	1.96873	1.50271	-0.125535
NM_152288	-0.94459	3.05477	0.150022	ORAI3	3.31184	3.47484	2.43699	2.46937
NM_152342	-0.743829	8.20342	0.242685	CDYL2	8.11819	8.84381	8.10268	7.36921
NM_152384	-0.876858	2.88788	0.189553	BBS5	3.37815	2.99821	2.27915	2.37366
NM_152411	-0.759882	2.6858	0.271275	ZNF786	2.63077	3.20513	2.49558	1.76769
NM_152416	-0.825765	4.06351	0.17484	NDUFAF6	4.43347	4.3443	3.69317	3.41854
NM_152421	-0.711739	5.99218	0.262376	FAM69B	5.93366	6.58568	6.04729	4.89294
NM_152433	-1.60132	2.30251	0.0263643	KBTBD3	3.0765	2.41577	1.25388	1.11162
NM_152445	-0.763024	1.30745	0.356039	FAM161B	1.45264	1.52184	0.459146	0.987781
NM_152493	-0.945039	4.81522	0.142004	ZNF362	4.86664	5.45663	4.75295	3.44233
NM_152524	-0.629504	3.9898	0.316333	SGOL2	4.54737	3.86101	3.50632	3.72039
NM_152536	-0.948182	7.18387	0.143613	FGD5	6.95087	8.01304	6.95993	6.19843
NM_152556	-0.806112	5.73325	0.167777	C7orf60	6.14838	5.98949	5.51433	4.96039
NM_152558	-0.848842	3.4104	0.242708	IQCE	2.65237	4.33755	3.13456	2.55913
NM_152625	-0.942135	3.18434	0.154644	ZNF366	3.4539	3.60416	2.31213	2.83547
NM_152640	-0.763946	5.38168	0.186032	DCP1B	5.83086	5.5617	4.91736	4.96039
NM_152727	-0.722158	4.91377	0.2899	CPNE2	4.45821	5.7049	5.01573	3.6404
NM_152742	-0.959952	1.23945	0.214406	GPC2	1.18269	1.70076	0.775198	0.130152
NM_152743	-0.904536	2.02001	0.238513	BRAT1	2.04906	2.49068	1.94255	0.347273
NM_152751	-0.71346	4.66548	0.239239	BEND7	4.72094	5.16421	4.51874	3.90289
NM_152772	-0.743066	5.45843	0.24364	TCP11L2	6.28255	4.97716	4.8002	5.23005
NM_153026	-1.26741	8.98369	0.0394469	PRICKLE1	9.38888	9.56812	8.39013	8.01285
NM_153045	-0.806134	2.42006	0.274931	C9orf91	2.04906	3.12902	1.98407	1.76769
NM_153268	-0.634439	5.3718	0.277364	PLCXD2	5.859	5.38971	5.15857	4.8402
NM_153269	-0.955288	3.10906	0.14627	C20orf96	3.53753	3.35966	2.82753	2.04127
NM_153367	-1.40013	2.98665	0.0723744	ZCCHC24	2.65237	3.96099	2.63243	0.987781
NM_153369	-0.655992	1.17634	0.403683	KIAA1919	1.40254	1.20342	0.459146	0.852309
NM_153371	-1.04013	5.70994	0.0757088	LNX2	6.36825	5.83995	5.06009	5.11637
NM_153613	-0.928347	2.49256	0.182917	LPCAT4	2.63077	2.96357	1.71487	2.04127
NM_153694	-0.967602	1.33412	0.230973	SYCP3	1.50106	1.65807	0.201964	0.987781
NM_172037	-0.715911	2.52809	0.319298	RDH10	2.96008	2.56188	1.76337	2.32331
NM_173165	-0.849498	5.32542	0.172959	NFATC3	5.05275	6.10922	5.11251	4.4639
NM_173480	-0.642794	1.18637	0.400708	ZNF57	1.2968	1.31755	0.775198	0.535952
NM_173491	-1.16005	1.98532	0.118284	LSM11	2.63077	1.96873	1.0343	1.33134
NM_173511	-0.868532	4.14039	0.162186	FAM117B	4.37621	4.57981	3.90254	3.24007
NM_173521	-0.678283	5.17001	0.309587	C9orf84	4.45821	6.04025	5.09367	4.36781
NM_173546	-0.866918	2.45304	0.213089	KLHDC8B	2.85224	2.62974	1.71487	2.04127
NM_173551	-0.914926	4.34401	0.200291	ANKS6	3.78246	5.26011	4.29782	2.97246
NM_173552	-1.30565	5.37785	0.0586293	C3orf58	6.4383	4.93755	3.94521	5.00898
NM_173554	-0.987373	1.62228	0.249093	C10orf107	2.44526	1.01327	0.572366	1.22566
NM_173557	-2.00615	6.3127	0.00328378	RNF152	6.50065	7.3434	5.48209	4.18253
NM_173567	-0.784135	3.02882	0.253452	EPHX4	3.36513	3.24894	2.99936	1.76769
NM_173591	-0.671535	2.41821	0.39446	OTOGL	3.09238	2.00325	1.38365	2.42231
NM_173618	-0.625166	1.94595	0.443921	INO80E	1.2968	2.62974	2.02443	0.535952
NM_173647	-0.702642	6.66274	0.282984	RNF149	6.378	7.38326	6.68258	5.66854
NM_173674	-1.31116	7.17162	0.0286555	DCBLD1	7.68268	7.67518	6.4505	6.27989
NM_173814	-0.793109	5.91937	0.194535	PRTG	6.64904	5.71014	5.22934	5.66349
NM_173855	-0.992918	1.29694	0.216649	MORN3	1.63727	1.42331	0.952997	-0.125535
NM_174858	-0.924679	4.97435	0.114901	AK5	5.13942	5.52949	4.57417	4.25146
NM_175848	-0.710282	3.2579	0.28829	DNMT3B	3.21356	3.77372	3.18884	2.27114
NM_175872	-1.13916	3.44727	0.07509	ZNF792	3.93123	3.78368	2.89439	2.51495
NM_177937	-0.679738	5.42882	0.246491	GOLM1	5.48464	5.91892	5.23795	4.80394
NM_178033	-0.750099	2.76124	0.334994	CYP4X1	3.57193	2.16445	1.61269	2.76176
NM_178439	-0.99693	4.4683	0.0989341	GMCL1	4.885	4.83108	4.123	3.53373
NM_178544	-0.652333	2.46305	0.355784	ZNF546	2.94266	2.36358	1.8998	2.16078
NM_178841	-0.767998	3.28651	0.334675	RNF166	2.69462	4.10304	3.492	1.33134
NM_178844	-0.834758	1.3648	0.294515	NLRC3	1.05877	1.93336	1.11127	0.130152
NM_178868	-0.788082	5.3042	0.205308	CMTM8	4.99897	6.07108	5.0984	4.53199
NM_181336	-0.689389	6.15301	0.249495	LEMD2	6.72234	6.11515	5.79365	5.72781
NM_181359	-0.87271	2.15677	0.266612	IL6R	2.28857	2.58486	0.677344	2.16078
NM_181708	-2.16601	0.916974	0.0287486	BCDIN3D	1.50106	1.20342	0.0538496	-5.16151
NM_181742	-0.71725	6.41699	0.232899	ORC4	6.98638	6.40867	5.90323	6.10838
NM_182757	-1.4321	7.37056	0.0175322	RNF144B	7.99787	7.82079	6.41299	6.54448
NM_183075	-0.86602	2.5247	0.244764	CYP2U1	3.24233	2.2242	1.66469	2.21701
NM_183078	-0.631174	4.85977	0.281041	RNF8	5.01989	5.22397	4.65994	4.30434
NM_183242	-0.638014	3.07065	0.333385	BTBD8	3.39106	3.21989	2.49558	2.83547
NM_194291	-1.54485	6.75609	0.0106214	TMEM65	7.47566	7.15667	5.83962	5.7181
NM_194359	-0.74239	3.60365	0.249234	RNF41	4.21139	3.47484	3.32432	2.93941
NM_194442	-0.677791	5.27645	0.251799	LBR	5.83795	5.22763	4.74693	5.01692
NM_198041	-0.725777	2.46818	0.359343	NUDT6	3.01113	2.36358	1.0343	2.602
NM_198057	-0.749052	2.37233	0.277646	TSC22D3	2.69462	2.53853	1.8998	1.8411
NM_198150	-1.20398	3.20905	0.0628969	ARSK	3.65986	3.60416	2.60608	2.21701
NM_198202	-0.789802	1.52367	0.344704	POP5	1.76172	1.65807	1.55875	-0.436511
NM_198217	-0.714846	1.87319	0.318809	ING1	2.11277	2.03696	1.55875	1.11162
NM_198275	-0.997118	2.10924	0.218414	MPZL3	2.99431	1.47341	1.0343	1.76769
NM_198281	-2.39361	3.02132	0.00606739	GPRIN3	2.34271	4.37098	1.8998	0.130152
NM_198309	-0.717235	5.17197	0.228007	TTC8	5.80458	5.04501	4.64059	4.86681
NM_198321	-0.826042	7.46342	0.193832	GALNT10	7.33416	8.1751	7.32762	6.54448
NM_198465	-0.815109	4.20351	0.345999	NRK	5.2639	2.99821	2.21085	4.45224
NM_198467	-0.737882	5.09222	0.206328	RSBN1L	5.41369	5.38644	4.91199	4.35534
NM_198475	-1.10314	1.81438	0.187169	FAM171A2	1.59328	2.5148	1.61269	-0.125535
NM_198526	-0.619071	5.72315	0.329527	ZNF710	5.31896	6.44679	5.7371	4.87557
NM_198565	-1.70534	2.35891	0.0261495	NRROS	3.04418	2.67326	0.459146	1.69035
NM_198892	-0.720835	8.15436	0.236919	BMP2K	8.64403	8.26897	7.60549	7.87765
NM_198926	-0.75759	3.35858	0.325033	FAM212B	3.09238	4.02958	3.54845	1.52198
NM_199160	-1.11576	3.40653	0.267032	LHX6	1.24087	4.67388	3.43326	0.987781
NM_199187	-0.698304	2.76903	0.296872	KRT18	2.77558	3.21989	2.40677	2.21701
NM_199242	-0.728955	1.91275	0.317399	UNC13D	2.31589	1.89711	1.61269	1.11162
NM_199320	-0.674537	6.00898	0.24398	JADE1	6.38124	6.21425	5.64949	5.60147
NM_199451	-0.622097	3.30348	0.337051	ZNF365	3.63838	3.42478	3.24115	2.46937
NM_201441	-1.10015	4.56953	0.117474	TEAD4	4.41464	5.4027	4.4974	2.79908
NM_201557	-1.22189	7.17182	0.0588738	FHL2	7.31228	7.928	6.87419	5.78473
NM_203406	-1.09806	2.16765	0.127959	MBLAC2	2.83345	2.10211	1.32023	1.52198
NM_207118	-0.656615	2.76981	0.344154	GTF2H5	2.69462	3.24894	2.57924	2.04127
NM_207327	-0.716393	2.13415	0.373331	CDPF1	1.67995	2.79648	2.21085	0.535952
NM_207346	-0.952795	1.07989	0.238891	TSEN54	1.05877	1.47341	0.775198	-0.436511
NM_207354	-0.903425	3.62102	0.174929	ANKRD13D	3.63838	4.22505	3.46293	2.46937
NM_207377	-0.833051	1.54148	0.289924	TOMM20L	2.01612	1.42331	1.38365	0.130152
NM_207381	-1.07339	5.90472	0.06397	TNFAIP8L3	6.30147	6.36786	5.13573	5.37921
NM_207446	-1.55471	4.61639	0.0143383	FAM174B	4.62588	5.5617	3.83607	3.34474

## Sheet: 0_vs_90_min_TNFa_upregulated
RefSeq	Log2_FC	logCPM	Pval	Symbol	0	90
NM_000021	0.829522	5.98497	0.0776704	PSEN1	5.50822	6.33761
NM_000031	1.19282	2.2481	0.0302358	ALAD	1.48969	2.67966
NM_000127	1.87286	11.0239	7.89065e-05	EXT1	9.80265	11.6755
NM_000138	1.40178	10.4684	0.0027456	FBN1	9.6034	11.0052
NM_000140	0.849478	4.3324	0.0797329	FECH	3.83606	4.68509
NM_000194	0.769042	3.72244	0.117211	HPRT1	3.27206	4.04049
NM_000201	6.54993	6.78178	7.84913e-27	ICAM1	1.22048	7.76436
NM_000212	0.770263	5.18935	0.104871	ITGB3	4.74791	5.51796
NM_000214	2.16713	7.31092	6.97417e-06	JAG1	5.85258	8.01951
NM_000215	1.91784	1.0568	0.0048482	JAK3	-0.292595	1.61239
NM_000219	1.16412	1.45941	0.0541647	KCNE1	0.689899	1.84913
NM_000228	3.80649	3.10356	2.73325e-10	LAMB3	0.182855	3.97768
NM_000304	1.30224	5.59167	0.0062273	PMP22	4.79422	6.09616
NM_000337	1.22079	1.68726	0.0411696	SGCD	0.889234	2.10564
NM_000358	0.843965	1.55982	0.151249	TGFBI	1.0083	1.84913
NM_000393	1.18382	8.55384	0.0111499	COL5A2	7.84323	9.02702
NM_000395	1.65035	4.73113	0.000741938	CSF2RB	3.67441	5.324
NM_000416	2.23783	6.92569	3.87706e-06	IFNGR1	5.40891	7.64648
NM_000447	1.98409	3.96178	9.22962e-05	PSEN2	2.64022	4.6226
NM_000450	9.86672	11.5063	6.01649e-48	SELE	2.64022	12.5047
NM_000494	0.829703	1.70598	0.16356	COL17A1	1.17029	1.99722
NM_000575	2.64886	3.84694	5.70312e-07	IL1A	1.97222	4.61803
NM_000584	9.06879	8.02238	2.75787e-39	CXCL8	-0.0353722	9.01881
NM_000585	0.881628	7.34067	0.0580897	IL15	6.8323	7.71387
NM_000593	2.73893	1.7012	2.79977e-05	TAP1	-0.292595	2.43147
NM_000600	2.89293	4.82802	1.96149e-08	IL6	2.74681	5.63791
NM_000602	1.33321	8.05991	0.00443312	SERPINE1	7.24374	8.57689
NM_000610	2.75119	7.70348	2.39578e-08	CD44	5.75166	8.50262
NM_000615	0.905201	1.59756	0.135875	NCAM1	1.0083	1.91021
NM_000629	1.14796	5.77809	0.0152916	IFNAR1	5.08918	6.23691
NM_000676	1.59586	1.68619	0.00843341	ADORA2B	0.616825	2.20648
NM_000740	0.683355	0.946654	0.306326	CHRM3	0.458539	1.13799
NM_000758	12.0394	4.38501	4.28852e-26	CSF2	-5.66613	5.37363
NM_000812	1.36175	1.11138	0.0364701	GABRB1	0.182855	1.53694
NM_000813	1.11758	0.854486	0.101731	GABRB2	0.0778635	1.18817
NM_000828	1.23193	0.822548	0.0743593	GRIA3	-0.0353722	1.18817
NM_000831	1.06034	0.915957	0.114705	GRIK3	0.182855	1.23666
NM_000833	1.40272	1.68672	0.0196081	GRIN2A	0.75945	2.15694
NM_000834	1.57032	1.73803	0.00886956	GRIN2B	0.689899	2.25437
NM_000836	0.670201	1.08677	0.299425	GRIN2D	0.616825	1.28358
NM_000837	1.08388	1.18862	0.0873602	GRINA	0.458539	1.53694
NM_000857	0.754656	4.27256	0.118218	GUCY1B3	3.83606	4.59031
NM_000885	0.75416	4.53457	0.115062	ITGA4	4.1001	4.85392
NM_000891	0.831426	4.70463	0.083721	KCNJ2	4.22214	5.05323
NM_000916	5.32682	0.998326	1.14854e-07	OXTR	-3.33108	1.84913
NM_000941	0.8038	4.13398	0.099256	POR	3.66537	4.4687
NM_000958	0.832384	5.77549	0.077083	PTGER4	5.29642	6.12864
NM_000959	2.5358	4.91922	4.82723e-07	PTGFR	3.14788	5.68235
NM_000980	0.602442	4.31663	0.210031	RPL18A	3.97411	4.57624
NM_001001396	1.06487	5.96852	0.0238818	ATP2B4	5.3368	6.40148
NM_001001436	1.1103	4.67036	0.0209964	C16orf87	4.00308	5.1129
NM_001001555	0.944446	9.16971	0.0417328	GRB10	8.6212	9.56563
NM_001001578	1.83336	1.53771	0.00356148	PDE9A	0.280721	2.10564
NM_001001852	0.988427	3.56281	0.0475102	PIM3	2.96859	3.95612
NM_001001974	1.31181	8.07686	0.00508725	PLEKHA1	7.27599	8.58774
NM_001002858	0.630299	9.12073	0.172191	ANXA2	8.77107	9.40135
NM_001003794	1.83251	6.39773	0.00013122	MGLL	5.20589	7.03813
NM_001004023	0.876946	2.29613	0.119955	DYRK3	1.75103	2.62606
NM_001005207	0.99217	7.10169	0.0334685	TRIM37	6.52048	7.51258
NM_001005404	1.43425	7.06078	0.0023394	YPEL2	6.17082	7.60495
NM_001005473	1.59167	0.68768	0.028153	PLCXD3	-0.440737	1.13799
NM_001005474	1.7543	8.35024	0.000212858	NFKBIZ	7.22081	8.97504
NM_001005527	0.700575	1.03228	0.28391	FAM19A4	0.539852	1.23666
NM_001006600	0.989878	8.96582	0.0330202	ERBB2IP	8.3872	9.37705
NM_001006616	0.602592	1.52164	0.307099	TSPAN17	1.11829	1.71864
NM_001006641	0.66299	4.64784	0.166343	SLC25A25	4.27059	4.93331
NM_001006932	1.19221	9.36086	0.0105253	RPS6KA2	8.64466	9.83684
NM_001007068	1.57509	8.79977	0.000823038	SDCBP	7.80673	9.38178
NM_001007231	1.35763	1.51933	0.0280658	ARHGAP25	0.616825	1.9688
NM_001007237	1.89519	1.28273	0.00355477	IGSF3	-0.0353722	1.84913
NM_001007270	1.10175	1.97366	0.0531979	GEMIN7	1.26898	2.36758
NM_001007595	2.96003	2.91617	2.344e-07	C2CD4B	0.75945	3.71215
NM_001007794	0.626106	6.576	0.178699	CEPT1	6.22715	6.85319
NM_001008213	1.69572	6.66305	0.000371204	OPTN	5.57726	7.27277
NM_001008539	4.49832	9.09664	3.01798e-17	SLC7A2	5.53574	10.0338
NM_001008564	0.629174	6.75091	0.176091	NUP58	6.40044	7.02955
NM_001008726	0.879481	3.15003	0.087996	WDR89	2.62166	3.50009
NM_001008781	1.00254	2.23681	0.067587	FAT3	1.60753	2.60774
NM_001008800	1.00311	4.70815	0.0362345	CCT3	4.11344	5.11615
NM_001010905	4.66718	2.9364	2.33956e-12	C6orf58	-0.79233	3.85102
NM_001010911	1.88048	1.02944	0.00589328	CASC10	-0.292595	1.57516
NM_001010942	0.694948	7.30197	0.134268	RAP1B	6.91177	7.60668
NM_001011708	0.988491	8.26038	0.0334656	OLA1	7.68243	8.67088
NM_001012302	1.95799	1.53743	0.00200444	ANO9	0.182855	2.13152
NM_001012393	1.44139	3.27003	0.00527207	OPCML	2.35581	3.79545
NM_001012502	0.844618	1.18929	0.180574	C9orf117	0.616825	1.45733
NM_001012631	2.85504	2.95322	4.5794e-07	IL32	0.889234	3.73765
NM_001012762	1.16412	1.45941	0.0541647	CTU2	0.689899	1.84913
NM_001017403	1.36175	1.11138	0.0364701	LGR6	0.182855	1.53694
NM_001017420	1.51051	3.25209	0.00359029	ESCO2	2.28682	3.79545
NM_001017424	1.70624	1.0298	0.0114671	KCNK2	-0.158259	1.53694
NM_001017536	1.71689	1.2597	0.00778239	VDR	0.0778635	1.78536
NM_001017927	1.49791	5.00071	0.00191108	C2orf76	4.05931	5.55667
NM_001017975	1.52056	9.65926	0.00120836	HFM1	8.70705	10.2276
NM_001018020	1.12694	8.39629	0.015593	TPM1	7.72488	8.85179
NM_001018058	0.950711	7.93282	0.0408524	TFEC	7.37971	8.33038
NM_001018072	0.888925	3.31273	0.0800449	BTBD11	2.78066	3.66863
NM_001018074	0.846987	7.8098	0.0680827	NR3C1	7.32413	8.17107
NM_001018109	0.709379	4.07515	0.146963	PIR	3.66537	4.37432
NM_001024071	0.919727	3.45882	0.0669077	GCH1	2.90863	3.82746
NM_001024381	0.915083	4.30082	0.0598076	TM2D2	3.76174	4.67633
NM_001024383	1.79755	10.5295	0.00014623	NAV3	9.3671	11.1646
NM_001024465	3.47428	7.23636	1.06027e-11	SOD2	4.6368	8.11056
NM_001024680	1.09762	2.01627	0.0525958	FBXO48	1.3159	2.41048
NM_001024688	0.842682	6.87186	0.0705379	NBN	6.38814	7.23074
NM_001024808	1.13936	2.04385	0.0435984	BCL7A	1.3159	2.45215
NM_001024844	0.911608	2.28442	0.0939709	CD82	1.71647	2.62606
NM_001025091	1.19096	3.60908	0.0172106	ABCF1	2.87768	4.06755
NM_001025101	1.16449	4.70741	0.0154782	MBP	4.00308	5.16708
NM_001025107	0.918671	5.50521	0.0517012	ADAR	4.96954	5.888
NM_001025201	0.688208	8.4725	0.136726	CHN1	8.08718	8.77537
NM_001025300	0.732966	6.49166	0.11634	RAB12	6.07689	6.80977
NM_001029858	1.11084	1.88444	0.0545053	SLC35F1	1.17029	2.27773
NM_001029880	1.29522	2.14917	0.020565	SFMBT2	1.3159	2.60774
NM_001029882	1.48668	4.3012	0.00259095	AHDC1	3.36424	4.85003
NM_001030060	0.734088	4.10826	0.132557	SAMD5	3.68338	4.41703
NM_001030287	0.725464	4.51005	0.129883	ATF3	4.09338	4.81852
NM_001031685	0.746366	6.88823	0.108705	TP53BP2	6.46562	7.21192
NM_001031698	0.828856	4.95527	0.0819087	PRPF40B	4.47565	5.30423
NM_001031713	0.949409	4.28912	0.0511317	MCUR1	3.72744	4.67633
NM_001031734	0.86254	0.88611	0.20188	FDX1L	0.280721	1.13799
NM_001033117	0.616542	1.18995	0.328977	SRGAP3	0.75945	1.37307
NM_001033602	1.47656	1.73829	0.0134852	MTUS2	0.75945	2.23062
NM_001034838	1.00348	2.20031	0.0686407	KCNIP1	1.56931	2.57038
NM_001035	1.93	2.1974	0.000760776	RYR2	0.889234	2.81357
NM_001037163	0.622127	1.48152	0.295344	FAM220A	1.06434	1.68409
NM_001037165	1.05596	4.81433	0.0278856	FOXK1	4.1847	5.24026
NM_001037663	0.666938	2.92332	0.19978	EEF1B2	2.52512	3.19114
NM_001037666	1.47386	1.18762	0.0222696	GATSL3	0.182855	1.64868
NM_001039350	1.20418	2.75504	0.0239832	DPP6	2.00122	3.2034
NM_001039374	1.00199	1.21348	0.111409	CCDC183	0.539852	1.53694
NM_001039569	1.23358	2.59558	0.0232134	AP1S3	1.81776	3.04902
NM_001039693	0.644133	5.00995	0.177102	TYW5	4.64601	5.28994
NM_001039711	1.13469	3.64594	0.0226682	DEDD	2.95383	4.08752
NM_001039763	0.720842	2.38618	0.196822	TMEM232	1.94262	2.66201
NM_001040002	2.52802	0.851833	0.000743295	MEOX1	-1.00655	1.49769
NM_001040169	1.18317	1.08538	0.0686121	HTR4	0.280721	1.45733
NM_001040272	1.46873	9.51786	0.00174455	ADAMTSL1	8.60388	10.0726
NM_001040697	0.768635	5.49092	0.103442	UEVLD	5.05155	5.82001
NM_001040708	1.44162	0.722691	0.0432784	HEY1	-0.292595	1.13799
NM_001042353	1.23079	2.82847	0.0201733	FAM110A	2.05753	3.28636
NM_001042425	0.601472	0.976005	0.3661	TFAP2A	0.539852	1.13799
NM_001042481	0.91731	9.92372	0.0477137	FRMD6	9.39315	10.3104
NM_001042599	0.689733	4.09858	0.157747	ERBB4	3.70116	4.39048
NM_001042762	0.964314	1.78985	0.0997376	FIGNL1	1.17029	2.13152
NM_001044385	1.00953	6.01679	0.0317381	TMEM237	5.42238	6.43174
NM_001045	2.01939	1.25906	0.00218	SLC6A4	-0.158259	1.84913
NM_001046	1.52252	10.8776	0.00118312	SLC12A2	9.92405	11.4466
NM_001077197	0.675577	2.7403	0.203896	PDE11A	2.33318	3.0077
NM_001077418	1.26944	2.77147	0.0173482	TMEM231	1.97222	3.23954
NM_001077442	1.34024	8.54859	0.0041988	HNRNPC	7.7276	9.0678
NM_001077526	0.682509	5.56623	0.146281	MTMR14	5.18076	5.86312
NM_001079522	1.11918	8.35078	0.0163127	KTN1	7.68466	8.80381
NM_001079691	0.944859	2.12463	0.0894045	N4BP2L1	1.53005	2.47254
NM_001079810	0.702092	1.72367	0.239109	XIRP2	1.26898	1.9688
NM_001079843	0.923189	2.0718	0.099444	CASZ1	1.48969	2.41048
NM_001079862	1.68316	4.4475	0.000668874	DBI	3.36424	5.04645
NM_001080391	0.62525	8.59192	0.175963	SP100	8.24516	8.87039
NM_001080393	3.32017	0.970935	2.73853e-05	GXYLT2	-1.56325	1.71864
NM_001080398	0.67064	7.51258	0.147976	KIAA0368	7.13754	7.80814
NM_001080412	0.687678	8.22281	0.137226	ZBTB38	7.83771	8.52537
NM_001080424	1.27832	3.1096	0.014139	KDM6B	2.31019	3.58682
NM_001080452	0.990532	3.42728	0.0493151	GPR108	2.82999	3.81952
NM_001080467	1.02742	1.50041	0.0854023	MYO5B	0.825801	1.84913
NM_001080470	0.749894	6.54412	0.108011	ZNF697	6.11884	6.86866
NM_001080497	1.02297	5.90591	0.0301737	MEGF9	5.30226	6.32505
NM_001080512	0.634583	2.04565	0.260795	BICC1	1.64477	2.27773
NM_001080527	1.07769	1.26132	0.0845978	MYO7B	0.539852	1.61239
NM_001080529	0.82057	0.946288	0.218049	WIPF3	0.372368	1.18817
NM_001080534	1.13388	1.89962	0.0492529	UNC13C	1.17029	2.30072
NM_001080850	0.62309	1.05996	0.338489	CCDC30	0.616825	1.23666
NM_001080976	1.26576	7.30415	0.00693905	DSE	6.53543	7.8011
NM_001081450	0.869271	0.975281	0.188826	LILRB3	0.372368	1.23666
NM_001082534	0.728236	1.87033	0.209013	CA10	1.40541	2.13152
NM_001082575	0.720114	1.82308	0.218165	RBFOX3	1.36135	2.07929
NM_001082971	1.25349	0.723089	0.0766304	DDC	-0.158259	1.086
NM_001083	1.70423	7.13593	0.000332735	PDE5A	6.04417	7.74825
NM_001083913	0.625803	6.14105	0.180357	WBP1L	5.79163	6.41735
NM_001085399	1.94607	7.09055	4.84949e-05	RELL1	5.81019	7.75607
NM_001094	1.09108	3.39492	0.0311486	ASIC2	2.72958	3.81952
NM_001098213	0.862023	8.62422	0.062925	HRH1	8.12925	8.99125
NM_001098484	1.85132	1.45763	0.00375801	SLC4A4	0.182855	2.0251
NM_001098500	0.782854	2.89263	0.133615	KIAA1217	2.42165	3.2034
NM_001098634	1.25349	0.723089	0.0766304	RBM47	-0.158259	1.086
NM_001098672	1.30905	4.29042	0.00766844	HEPHL1	3.48208	4.79037
NM_001098816	0.900091	2.96648	0.0825966	TENM4	2.42165	3.32051
NM_001098817	0.856041	5.15594	0.0722896	INO80C	4.65971	5.5155
NM_001099289	0.970426	7.60156	0.0370982	SH3RF3	7.03522	8.00559
NM_001099455	0.819423	6.34975	0.0793968	CPPED1	5.88016	6.69948
NM_001100393	1.5468	1.78807	0.00929295	RALYL	0.75945	2.30072
NM_001100425	0.62309	1.05996	0.338489	KIAA0895	0.616825	1.23666
NM_001100873	0.701522	1.41902	0.243727	C16orf46	0.949995	1.64868
NM_001102653	0.893408	6.94514	0.0552968	OTUD4	6.42873	7.32206
NM_001104558	3.76793	2.45258	5.0935e-09	ELOVL7	-0.440737	3.30922
NM_001104595	0.797534	5.17203	0.0935223	FAM118A	4.71328	5.51058
NM_001104629	1.44623	4.40906	0.00318064	C4orf19	3.50251	4.94794
NM_001105568	0.806821	8.60194	0.0814953	KIF13A	8.14233	8.94913
NM_001109763	1.70541	1.83593	0.00414379	GSG1L	0.689899	2.38919
NM_001111018	1.14868	10.5333	0.0135522	NAV2	9.84738	10.9961
NM_001111283	1.00851	3.03673	0.0532699	IGF1	2.42165	3.42883
NM_001112802	0.986223	4.96723	0.0389283	SLC8A1	4.38503	5.37092
NM_001113239	1.22227	7.4428	0.00902994	HIPK2	6.70477	7.92696
NM_001113348	1.22493	7.41687	0.00889128	ECE1	6.67696	7.90181
NM_001113498	1.43586	2.24729	0.00974086	MDGA2	1.3159	2.74816
NM_001114086	1.30323	0.974194	0.0512499	CLIC5	0.0778635	1.37307
NM_001114132	0.736553	6.81971	0.113527	NBEAL1	6.40315	7.13964
NM_001122636	1.25349	0.723089	0.0766304	GALNT9	-0.158259	1.086
NM_001122679	1.33727	2.87509	0.0115072	TENM2	2.02965	3.36482
NM_001123384	0.716996	5.15186	0.130282	BCOR	4.74363	5.46042
NM_001124758	1.15473	4.72894	0.0162389	SPNS2	4.03147	5.18572
NM_001126	0.709694	7.82283	0.125576	ADSS	7.42389	8.13355
NM_001126050	1.54486	5.02849	0.00137986	HDGF	4.0524	5.5967
NM_001126114	0.759748	2.72288	0.153515	TP53	2.26307	3.02161
NM_001127323	0.790277	2.42863	0.153512	GRM8	1.94262	2.73134
NM_001127493	1.19438	1.66966	0.0462979	ANK2	0.889234	2.07929
NM_001127713	1.24797	5.49866	0.0087564	ATL1	4.73933	5.987
NM_001127716	0.772141	6.1483	0.0986446	ETFA	5.70835	6.48037
NM_001128161	0.923674	6.71045	0.0479422	UBP1	6.17401	7.09759
NM_001128226	0.60057	6.06447	0.200075	DIS3	5.73016	6.33064
NM_001128303	1.095	4.02551	0.0265125	LACC1	3.36424	4.45851
NM_001128306	0.68652	9.2973	0.137219	PLSCR4	8.91327	9.59978
NM_001128428	0.691281	6.96762	0.136937	FSTL5	6.57937	7.27059
NM_001128592	0.825968	2.12506	0.137251	PSMG4	1.60753	2.43147
NM_001128620	0.635806	3.36977	0.207928	PAK1	2.99767	3.63284
NM_001128831	2.18472	0.788341	0.00306617	CA1	-0.79233	1.37307
NM_001128840	0.702092	1.72367	0.239109	CACNA1D	1.26898	1.9688
NM_001128917	0.789972	1.3537	0.195226	TOMM40	0.825801	1.61239
NM_001128922	1.96619	4.41244	7.9558e-05	LRRC32	3.10844	5.0734
NM_001129839	0.889379	2.75628	0.0934888	CACNA1C	2.21437	3.10234
NM_001130003	0.810312	0.855244	0.234418	SYNPR	0.280721	1.086
NM_001130017	0.998592	1.35308	0.1031	ART3	0.689899	1.68409
NM_001130046	6.33479	4.54557	3.59135e-21	CCL20	-0.79233	5.51796
NM_001130064	0.765739	1.80681	0.191016	GAP43	1.3159	2.07929
NM_001130081	0.751727	8.71358	0.104222	PLD1	8.28882	9.04053
NM_001130140	0.825452	5.43411	0.0800397	ERAP2	4.95849	5.78375
NM_001131027	1.13699	5.14344	0.0171634	PDLIM4	4.46007	5.5967
NM_001134285	1.94269	2.01376	0.000946719	ESRRG	0.689899	2.62606
NM_001134338	1.10613	4.12936	0.0241747	RNF24	3.46136	4.56679
NM_001134369	1.08439	8.76489	0.0197828	LRRFIP2	8.12267	9.20703
NM_001134398	0.668857	5.65559	0.155703	VAV2	5.27876	5.94748
NM_001134418	1.83111	6.19687	0.000138315	P3H2	5.00577	6.83657
NM_001134437	1.19863	8.9572	0.0101593	PHLDB2	8.23642	9.43502
NM_001134445	1.0694	10.6799	0.0213092	DDAH1	10.0482	11.1176
NM_001134658	0.998029	3.02985	0.0559398	SLC35G1	2.42165	3.41836
NM_001134745	1.13913	2.2121	0.0390721	LRRTM4	1.48969	2.62606
NM_001134758	0.652675	2.12571	0.2411	ARFRP1	1.71647	2.36758
NM_001135	1.07511	0.723486	0.127202	ACAN	-0.0353722	1.03207
NM_001135004	0.952115	2.66966	0.075635	DNAJB5	2.08488	3.03538
NM_001135179	0.662493	5.15214	0.161806	ZDHHC3	4.77755	5.43985
NM_001135575	0.726368	3.76494	0.137462	SMIM13	3.34174	4.06755
NM_001135659	1.50536	2.7871	0.00508225	NRXN1	1.81776	3.32051
NM_001135748	1.40158	2.61358	0.0101458	NEIL2	1.71647	3.11536
NM_001135823	2.06788	1.02909	0.0028277	SSPN	-0.440737	1.61239
NM_001136021	0.718513	5.54678	0.126711	NFATC2	5.13896	5.85731
NM_001136103	0.964199	1.73985	0.102722	TMEM132C	1.11829	2.07929
NM_001136108	0.879481	3.15003	0.087996	R3HCC1	2.62166	3.50009
NM_001136472	2.06047	0.499581	0.00874119	LITAF	-1.00655	1.03207
NM_001136528	0.658734	3.6068	0.182716	SERPINE2	3.22366	3.88184
NM_001136541	0.88012	2.59693	0.103483	APOL1	2.05753	2.93609
NM_001136558	0.804808	5.568	0.0880938	GPR107	5.10596	5.91059
NM_001139468	0.856686	6.90667	0.065996	TBL1X	6.41398	7.27059
NM_001139501	0.670201	1.08677	0.299425	FGF13	0.616825	1.28358
NM_001142275	0.773965	3.33586	0.126387	NIPA1	2.87768	3.65085
NM_001142298	1.13177	7.14765	0.0155408	SQSTM1	6.4721	7.60379
NM_001142308	1.4889	1.98677	0.00973774	MALRD1	1.0083	2.49265
NM_001142395	0.901903	8.90414	0.0517424	PRRG1	8.38341	9.2853
NM_001142446	1.11063	2.74699	0.0370561	ANK1	2.05753	3.16632
NM_001142601	1.11212	1.61552	0.065793	SPHK1	0.889234	1.99722
NM_001142772	0.608592	2.76581	0.251561	PCDH15	2.40004	3.0077
NM_001142807	1.29646	3.21075	0.0120997	ACOXL	2.40004	3.6949
NM_001142864	1.07873	4.87913	0.0247428	PIEZO1	4.2344	5.31273
NM_001143820	2.10547	10.3647	1.07109e-05	ETS1	8.95764	11.0631
NM_001143948	1.19306	4.39138	0.0142662	ADTRP	3.66537	4.8578
NM_001143958	0.714613	6.84222	0.124536	TMEM30A	6.43937	7.15392
NM_001144769	0.903529	7.97979	0.0517323	DST	7.45763	8.36112
NM_001144823	0.86101	7.00957	0.0645175	DENND4A	6.51421	7.37515
NM_001144832	1.72769	3.29226	0.000928869	TTC39A	2.16396	3.88944
NM_001144884	1.32205	8.27549	0.0047455	SLC30A7	7.4674	8.7894
NM_001144924	1.12073	5.53386	0.0180345	LOC81691	4.86298	5.98345
NM_001144952	0.747685	1.05961	0.249343	SDK2	0.539852	1.28358
NM_001144962	0.784644	1.94563	0.169793	NFKBIL1	1.44816	2.23062
NM_001145044	0.905598	2.52975	0.0967493	SLCO3A1	1.97222	2.87613
NM_001145080	1.14006	1.63379	0.0585304	C17orf104	0.889234	2.0251
NM_001145099	2.18353	3.62399	2.97428e-05	SLC2A6	2.13808	4.31909
[truncated: 1,237 more rows]

## Sheet: 0_vs_90_min_TNFa_downregulated
RefSeq	Log2_FC	logCPM	Pval	Symbol	0	90
[truncated: 1,402 more rows]
