# Supplementary material for: Binding of nuclear factor κB to noncanonical consensus sites reveals its multimodal role during the early inflammatory response
Source: HighWire-hosted journal article supplement (doi:10.1101/gr.210005.116), 2016-09-15
Supplement: Supplemental_Table_S2.xlsx [file Supplemental_Table_S2.xlsx]

## Sheet: 30min_TNF_vs_C646_downregulated
gene name	baseMean	log2FoldChange	pvalue
SNX22	18077.9	-1.7646	6.21907e-10
C17orf72	17312.3	-1.6203	1.06453e-08
LOC284889	11947.3	-2.04934	6.69269e-13
SNRK-AS1	9082.86	-1.69464	9.03207e-09
ATP6V1C2	8352.93	-1.95428	1.42314e-10
MXD3	6281.18	-1.94099	2.77467e-11
BMP6	5046.51	-2.25977	1.16916e-13
LOC255130	4759.81	-1.48236	1.66936e-07
MIR1282	4273.4	-1.89414	4.24725e-11
MTRNR2L2	3748.3	-1.6135	3.66333e-09
SH3BP5-AS1	3429.58	-1.36979	5.01611e-07
JMJD8	3307.19	-1.65393	1.59397e-08
PITRM1-AS1	3258.93	-1.23561	2.81254e-05
LOC100129034	3232.49	-1.66901	1.10845e-08
HIF1A-AS2	2956.24	-2.38323	6.98525e-12
KRR1	2893.54	-2.37667	1.23328e-13
GPR39	2579.45	-1.59578	3.95802e-07
GATC	2474.73	-1.69083	1.55988e-08
KRT8	2382.6	-1.57829	5.97389e-08
RUSC1-AS1	2325.38	-1.94876	3.71146e-10
GNRHR2	2315.44	-1.78551	2.01006e-09
RPL10	2223.49	-1.84843	4.81731e-10
AGBL5	2199.69	-1.99551	3.62983e-10
CASKIN1	2097.07	-1.22529	1.29211e-05
POLR2B	2060.75	-2.68363	2.33299e-14
POLR3H	1968.88	-1.25036	1.59394e-05
MFSD11	1952.6	-1.05107	0.000349167
WDR38	1864.26	-2.16308	7.30252e-14
C10orf55	1855.61	-3.07709	3.61493e-23
PYROXD1	1843.35	-2.1888	3.99174e-12
SMPD4	1776.27	-1.5062	3.30849e-07
LOC100129931	1760.29	-1.57103	9.91012e-08
FAM166A	1740.12	-1.41561	8.70888e-07
ZACN	1715.63	-1.64193	1.03432e-08
SPAG5-AS1	1641.94	-1.02941	0.000373698
RPAIN	1640.73	-2.25709	1.14681e-13
PHC1	1634.94	-1.69433	1.32286e-08
SYNC	1525.03	-1.41923	4.03332e-06
MTRNR2L8	1480.08	-1.70724	9.98258e-10
SLC25A5-AS1	1472.88	-1.71785	1.04464e-08
CCDC73	1454.71	-1.81614	4.65816e-09
HNRNPU-AS1	1420.19	-1.73075	3.75315e-08
CTNS	1380.52	-1.54261	5.60482e-08
ERCC1	1343.59	-1.24847	2.02543e-05
WDR83	1318.89	-1.95306	7.85193e-11
FAM211A	1307.42	-1.21259	0.000145933
THAP3	1306.25	-1.32001	4.91169e-06
SRR	1276.28	-1.42628	2.31962e-06
CNTD1	1225.83	-1.92891	2.55383e-10
PCNA-AS1	1207.27	-1.71168	2.59537e-09
TCP1	1169.26	-1.93756	3.84568e-08
CIDEB	1164.79	-1.26512	3.10453e-05
ATG7	1160.44	-1.73661	4.68907e-08
NCAPH2	1141.04	-1.54447	1.03111e-07
LRTOMT	1134.85	-1.34175	2.1494e-06
C6orf201	1110.59	-1.61156	1.87463e-07
LGALS8	1105.87	-1.09628	0.000250367
EME1	1100.11	-1.82061	3.85256e-09
MMACHC	1095.37	-2.21907	5.95275e-13
LOC100133286	1066.19	-1.38866	2.70352e-07
DNAH11	1037.23	-1.598	1.54514e-07
COG5	1032.33	-2.11256	1.19863e-11
RAD9A	1013.41	-1.90298	1.43081e-09
DALRD3	997.78	-1.05132	0.000292431
STUB1	996.509	-1.39736	1.11471e-06
FANCL	958.785	-1.75942	6.43068e-08
SAMD11	953.542	-1.34816	5.88767e-06
IDI2-AS1	942.486	-1.6522	2.25098e-06
CD3EAP	941.646	-1.06263	0.000488486
ARG2	918.602	-1.57499	7.15616e-07
GLIPR1	914.708	-1.6533	6.96656e-07
P2RX5-TAX1BP3	899.218	-1.44196	9.90342e-07
LOC100130093	893.899	-1.21571	7.81987e-05
CAPN12	866.469	-1.56111	9.51304e-07
FBXO22-AS1	858.661	-1.79021	1.09641e-08
LOC254128	852.148	-1.64155	1.79851e-07
MROH8	845.807	-1.75631	1.3658e-08
LOC100289511	842.961	-1.20984	5.84776e-05
TMEM120B	832.648	-1.09001	0.000112254
EIF2AK1	826.073	-1.46314	7.3224e-06
SLC25A35	824.333	-1.40871	2.43272e-06
CNP	811.712	-1.33466	3.13834e-05
ASB6	772.31	-1.16786	4.57023e-05
CERS6-AS1	757.496	-1.5199	1.4458e-06
PTPMT1	754.695	-2.08239	4.3812e-12
PDAP1	744.246	-1.51345	1.74038e-06
FZD4	744.119	-1.3821	4.17389e-05
ACAT2	736.724	-2.25697	3.11159e-10
PLTP	728.432	-1.64447	7.76496e-09
RNASEH2C	710.503	-1.65072	1.16327e-07
LOC100129148	708.865	-1.23839	5.19367e-05
DDTL	708.405	-1.66885	4.46843e-09
FAM86A	707.369	-1.62385	2.99067e-08
CCDC42B	690.114	-1.36752	9.52736e-06
HEATR1	685.779	-1.68954	1.57811e-07
CACTIN-AS1	673.205	-1.06121	0.00042051
BZRAP1-AS1	669.988	-1.94178	4.29065e-10
RER1	665.789	-1.74093	3.78191e-08
AGAP2	655.546	-1.45317	4.45807e-06
LOC100130476	654.43	-6.53052	7.02917e-73
SLC12A6	652.3	-1.75155	1.86313e-07
MIR497HG	649.89	-2.01829	7.79701e-10
NDUFB2-AS1	643.434	-1.85496	1.31349e-10
MIR3661	641.697	-1.49045	2.9693e-06
GPANK1	641.393	-1.73228	5.50164e-09
TAF5	637.058	-2.57266	1.76389e-12
KMO	635.963	-2.156	3.27826e-10
C3orf45	633.592	-1.69616	5.97401e-08
GAS5-AS1	611.623	-1.43399	9.44066e-06
PHKG1	606.327	-1.42668	1.34091e-06
SRRM5	605.872	-1.72194	1.96206e-08
TTI2	605.472	-1.69195	2.36084e-07
CCDC84	605.087	-2.55144	1.19647e-15
LOC100506963	573.434	-1.02215	0.000957822
LOC100507118	556.39	-1.3728	1.26834e-06
DOC2A	532.448	-1.6478	1.34264e-06
TMX2	527.662	-1.47813	2.86911e-06
SEC61A2	523.186	-1.57582	1.95423e-07
HOXA-AS3	519.663	-1.15027	0.000209241
LOC100133957	513.125	-1.75532	5.72535e-08
RGP1	496.889	-1.94948	5.40514e-10
ANAPC10	496.75	-1.51123	4.04161e-06
POU4F1-AS1	495.268	-1.16261	0.000382243
SNAPC5	491.785	-1.49474	6.27742e-07
SLC5A2	490.471	-1.28012	2.41081e-05
DOPEY1	489.889	-1.85211	7.5292e-10
AP4B1-AS1	485.482	-1.13415	0.000189188
TOX4	485.401	-1.01483	0.00103487
LIMD2	478.291	-1.12881	0.000511029
SLC18A2	471.783	-1.42749	6.87452e-06
LOC100505624	471.415	-1.14825	0.00015704
WTAPP1	469.022	-2.38125	5.88624e-15
METTL5	468.783	-2.13155	2.7465e-09
FAM175A	465.722	-1.57132	3.31046e-06
OAZ3	463.157	-1.47997	5.63892e-07
BAIAP3	460.976	-1.73697	2.17784e-08
MCMDC2	459.852	-1.67631	3.61615e-07
PPP2R5D	458.792	-1.81503	1.62016e-10
TIPARP-AS1	455.037	-1.0772	0.000268431
LOC100507577	455.025	-1.75372	2.64991e-08
C1orf56	454.532	-1.58273	8.90377e-07
AFG3L2	445.124	-1.57967	2.48468e-06
HTRA2	439.45	-1.6238	2.2293e-08
MINA	439.08	-1.0337	0.00131014
C9orf114	438.539	-1.48845	4.26346e-07
TMEM184A	437.972	-1.26043	2.37626e-05
C5orf45	436.964	-1.44827	6.60179e-06
POLDIP2	431.98	-1.88696	1.15068e-07
RHOQ	431.166	-1.04363	0.00220935
PEX10	430.185	-1.35865	6.21878e-06
2002-09-01	428.277	-1.55271	7.75372e-07
STAB1	428.162	-1.38093	2.01167e-06
DPF3	422.386	-2.321	3.30917e-12
CRYBG3	407.371	-1.32015	0.000194908
DHRS4-AS1	407.154	-1.26274	0.000284433
TMEM97	406.63	-2.09158	8.76349e-10
CABP7	406.153	-1.86096	2.72163e-09
TMEM140	404.748	-1.29495	1.98316e-05
HMHA1	403.793	-1.16451	0.00110139
LOC100288198	403.741	-1.72986	3.45613e-07
LOC100130855	402.242	-1.18328	0.000379537
GBA2	401.818	-1.58952	4.06499e-07
NAPA-AS1	400.713	-1.26101	4.06414e-05
NR2C2AP	399.367	-1.45708	2.78927e-06
PP2D1	385.654	-1.75852	5.60372e-07
ACIN1	385.238	-1.86751	6.32137e-10
FAM71E1	381.061	-1.82506	1.76638e-09
TUBGCP2	377.425	-1.70853	7.33311e-08
CLVS1	369.777	-1.63796	0.00630324
CALR	362.964	-1.78836	5.72394e-08
LOC100506469	361.664	-1.83411	4.70868e-08
GABPA	358.147	-2.07221	7.35882e-11
MLK7-AS1	356.967	-1.00551	0.00254568
FUZ	355.733	-1.12716	0.000287025
PRG4	355.107	-1.08116	0.000528061
LOC100506321	354.411	-1.2871	1.61183e-05
TPT1	353.069	-2.86736	2.90646e-15
BCCIP	350.503	-1.64935	2.63605e-07
PDCD4	347.891	-2.26582	3.11336e-09
CEBPZ	342.921	-1.26584	0.000970094
TXNDC17	341.329	-1.70675	1.36785e-06
SERHL	338.16	-1.11203	0.000300962
SLC4A5	336.927	-1.16286	0.00138129
CARM1	335.038	-1.5018	3.12074e-06
MMEL1	332.606	-1.16869	0.00011725
LOC100505876	327.799	-1.16926	0.000455909
SLC3A1	327.112	-1.43618	9.31509e-05
YIF1B	326.291	-1.50121	7.94013e-06
C15orf40	324.483	-1.61034	2.11544e-06
TM6SF1	321.398	-1.73044	3.68433e-06
POLR2J4	319.523	-1.12452	0.000362838
EEF1A1	318.846	-1.97129	1.88318e-09
DCAF13	318.506	-1.33998	0.000137617
HOXA-AS4	312.94	-1.58573	3.33239e-06
GABPB1-AS1	312.282	-1.19895	0.000757726
LOXL3	308.716	-1.34726	4.34304e-05
NAPEPLD	306.47	-1.18311	0.000638603
LCTL	305.05	-1.24479	0.000700733
CCDC85B	298.87	-1.05767	0.00119322
PHF10	294.15	-2.08517	3.48454e-09
TMOD1	293.14	-1.23428	0.000383658
LOC100129518	292.303	-1.34206	0.000196757
C3orf17	291.735	-1.87208	2.89493e-07
LRP11	288.247	-1.9508	5.57958e-09
FAM69B	284.396	-1.33385	8.68519e-05
TMEM50B	283.299	-2.03314	4.08757e-10
FN1	283.203	-1.09298	0.000358276
RAD17	279.855	-2.06492	1.33204e-08
LOC646626	279.813	-1.75621	3.27616e-07
LOC148413	279.384	-1.95069	2.20309e-09
DHX32	279.284	-1.31938	0.000330659
LOC100131626	279.057	-1.18844	0.000613821
ALG1	275.982	-1.13928	0.00051434
BCL2L12	274.163	-1.06551	0.000607242
ENDOG	273.858	-1.17295	0.000207879
GTF2IRD1P1	273.808	-1.31617	0.000174202
MED4-AS1	273.416	-1.13767	0.000348956
TAF6	268.207	-1.31549	0.000417014
RMRP	268.195	-1.55831	4.77291e-07
EFEMP1	266.596	-2.3102	1.13016e-12
HBP1	265.676	-1.26712	7.02834e-05
ARHGEF39	265.595	-1.58839	7.33005e-06
CENPN	264.466	-1.44761	7.53837e-06
HK2	262.036	-1.28651	2.53041e-05
KBTBD4	257.046	-1.24732	0.000623414
SERPINE1	256.776	-1.91707	1.56541e-09
RPPH1	256.181	-1.9082	1.00381e-08
GPR137	255.024	-1.49365	1.12366e-05
LOC100287042	250.273	-1.09395	0.0015034
GJD3	244.31	-1.32439	2.54917e-05
PRR19	242.57	-1.26885	9.17252e-05
SPTY2D1-AS1	242.413	-1.27534	7.1569e-05
VIM	241.746	-1.81081	5.9462e-09
SUPT7L	239.177	-1.12694	0.00214543
MRPS18C	237.201	-2.37913	1.53439e-10
UCHL5	236.374	-1.06526	0.000701306
GAS6-AS1	235.346	-1.37905	3.88953e-05
PIGF	231.92	-1.42947	6.36325e-05
PRH1-PRR4	231.176	-1.83398	1.81769e-07
ISYNA1	231.172	-1.00667	0.00337358
PPAP2A	230.951	-1.50856	5.72928e-05
B3GAT2	230.837	-1.65265	1.55097e-06
HCG25	230.436	-1.62479	3.38068e-06
SNX21	229.954	-1.02846	0.00135124
CDK4	229.353	-1.80032	9.38057e-08
HSP90AB1	229.101	-2.18934	3.55696e-09
PTGDR2	228.897	-1.3145	6.11845e-05
TSR1	227.955	-1.27906	0.0012202
MIR4253	227.043	-1.31981	4.15232e-05
SRSF9	226.174	-1.85723	3.44217e-08
TVP23A	226.021	-1.23471	0.000236863
PTMA	224.98	-1.85511	1.17873e-07
ESRRA	223.497	-2.33055	1.58482e-09
TBCE	219.99	-1.68144	7.10127e-07
RBBP4	219.812	-1.07822	0.00309573
HSP90B1	219.377	-1.2187	0.000574114
CLTC	218.92	-1.41263	0.000536405
SIRT3	214.276	-1.41534	1.31192e-05
PKMYT1	214.051	-1.18274	0.00124853
SLC24A5	213.683	-1.12285	0.00212756
MAP3K15	212.306	-1.43394	9.02555e-06
SKIV2L2	212.043	-2.07599	2.85226e-08
COPA	210.586	-1.2503	0.000105663
NME7	210.304	-1.9441	6.32397e-08
MIF4GD	209.942	-1.8639	7.24908e-08
ATP5F1	208.303	-1.1565	0.000739261
SNAP47	208.125	-1.22069	0.000651806
SLC9B1	207.392	-1.79266	1.43035e-06
TAF10	205.968	-1.75407	2.18145e-07
C11orf57	203.984	-1.28651	0.000316834
OPA1-AS1	201.776	-1.28464	0.00134284
BRF1	199.531	-1.33193	0.000307114
DDAH1	196.852	-1.27385	0.000222055
LOC100506083	196.296	-1.15292	0.000462633
LOC100507557	196.205	-1.34106	0.000856685
SPDYA	195.958	-1.2714	0.00179846
CRYZ	195.468	-1.55991	1.42501e-05
MED31	192.093	-1.92696	1.34465e-07
PIGB	191.814	-1.78209	1.50487e-06
SLC5A6	190.99	-1.29101	0.000136785
WDR6	190.809	-1.25863	0.000264591
CANX	190.747	-1.73057	7.11381e-06
PTTG1IP	189.271	-1.87164	6.15805e-08
NPM1	188.925	-1.78453	6.06323e-07
SPAG17	188.243	-1.28236	0.000139268
GAPDH	187.448	-1.3739	3.45563e-05
SSB	186.686	-2.27106	2.31022e-09
TRPT1	184.823	-1.50672	6.41117e-05
SLC4A1AP	184.601	-1.60487	1.17352e-05
HARS	180.406	-1.09321	0.0016657
PCBP2	177.91	-1.32965	0.00013227
C11orf49	176.983	-1.14201	0.00121649
TMEM200B	176.433	-1.27758	0.000339041
APP	176.206	-1.20929	0.000186705
LONP1	175.563	-1.21833	0.000530378
MAK16	173.57	-1.46683	1.13649e-05
ZNF3	172.235	-1.14911	0.000685665
PTRF	171.185	-1.45967	2.8627e-05
RNF39	171.068	-1.41942	8.29555e-05
TPTE2P5	171	-1.02011	0.00298245
CEP63	170.585	-1.13552	0.00121003
C20orf118	169.046	-1.49862	2.12164e-05
LOC100507463	168.992	-1.60089	1.8862e-05
ANKRD6	166.681	-1.16917	0.00150212
IGFBP7	165.139	-1.76988	4.36371e-06
VRK2	164.394	-1.59182	2.71432e-06
KRI1	162.255	-1.32408	0.000307451
DIMT1	161.253	-1.23604	0.00108741
MSN	159.289	-1.56453	2.46543e-06
HOXA10	158.081	-1.21416	0.000604256
TOM1L1	157.685	-2.23454	7.10045e-09
SNRPD3	156.639	-1.47168	1.47678e-05
SIAE	156.563	-1.23675	0.00138366
C1orf122	156.287	-1.26249	0.000432254
MIPEPP3	155.569	-1.84027	2.50069e-07
DCBLD1	155.408	-1.25441	0.000455458
MTIF3	155.321	-2.03148	5.77342e-08
EFCAB10	155.042	-1.4056	0.000351932
RPS25	154.816	-1.05612	0.0030472
SSR4	154.795	-1.28566	0.000519546
SCAND1	154.633	-1.64	1.86471e-05
CP	154.461	-1.4395	0.000181451
MKRN2	154.251	-1.41291	0.000193841
BRICD5	153.629	-1.50353	1.10045e-05
LBX2-AS1	151.874	-1.44468	2.23551e-05
EXOSC9	151.296	-1.70457	1.21025e-05
NCOA4	150.387	-1.19328	0.00238312
ARIH2OS	150.238	-1.05434	0.00297483
TPM4	148.82	-1.13347	0.00161361
RECQL	148.384	-1.29875	0.000495885
RPS24	148.079	-1.39363	0.00014004
NUDT6	146.204	-1.32768	0.000517833
ERMAP	144.763	-1.54961	5.84832e-05
CHTOP	144.437	-1.23431	0.00118803
TIMM17B	143.831	-1.1794	0.00106809
ABHD1	141.478	-1.13861	0.00372302
NPRL3	140.98	-1.17336	0.00171907
RPF1	138.24	-1.5325	0.000111888
SET	138.123	-1.0441	0.00261653
PPP1R18	137.754	-1.00115	0.00360946
SDCCAG8	137.309	-1.1838	0.00188328
RAD21-AS1	136.634	-1.89595	3.01835e-06
DMTF1	136.501	-1.22709	0.00095679
NAV2	135.713	-1.08068	0.0032288
IFT74	134.757	-1.16685	0.0020193
ACTB	132.386	-1.01166	0.00358386
RBM25	132.004	-1.38225	6.48603e-05
CHADL	131.808	-1.08115	0.00235748
LGALS8-AS1	131.523	-1.86993	1.81966e-06
YBX1	130.255	-1.32813	0.000175431
C22orf15	129.932	-1.92844	5.14355e-07
DDIT3	129.73	-1.2086	0.00355676
TXNRD2	128.923	-1.45789	8.63462e-05
LOC286190	127.786	-1.68391	5.91344e-06
KLF9	127.282	-2.21581	1.75356e-09
LOC100133445	126.496	-1.5158	2.77507e-05
BAZ1A	125.896	-1.59737	4.28679e-05
ACTG1	124.232	-1.24563	0.00110407
STK19	122.343	-1.03937	0.00622053
C11orf48	121.908	-1.18273	0.001192
ATP5J	121.366	-1.11284	0.0027542
PMCH	121.363	-1.58967	3.56392e-05
RPL19	118.425	-1.74142	1.43924e-06
KLF7	118.409	-1.23879	0.000483951
CALD1	116.646	-1.2706	0.00111212
MEA1	116.338	-1.36086	0.000293327
KBTBD3	115.03	-1.54081	6.09016e-05
SRSF4	114.962	-1.55902	5.78961e-05
C22orf26	113.516	-1.10125	0.00268511
NCAPG	113.488	-1.18157	0.00408974
RHCE	113.165	-1.8765	4.41802e-05
GFM2	112.857	-1.87103	7.77551e-06
PDHX	111.808	-1.0238	0.00649087
TMSB10	110.484	-1.51527	5.22002e-05
INTS5	110.293	-1.24529	0.000601326
SUPT20H	110.149	-1.7338	9.35783e-06
TBC1D22B	109.728	-1.13747	0.00169022
PKN3	108.949	-1.07517	0.00429
NRM	108.658	-1.16357	0.00347166
SREK1	108.487	-1.3405	0.00134691
CPT2	108.119	-1.25719	0.00249445
PUSL1	108.067	-1.19775	0.00319011
NSA2	108	-1.5059	4.10086e-05
CCDC176	107.23	-1.82519	4.20004e-05
EXOSC8	107.076	-1.00051	0.011593
RPL27A	105.716	-1.7568	1.91666e-05
WTAP	105.124	-1.46466	0.00011829
RGS5	104.941	-1.51317	0.000123246
C10orf25	104.934	-1.58641	4.12585e-05
RPL11	104.214	-2.08812	0.00166164
HSPA8	103.118	-1.46968	0.000218349
FAM118B	102.114	-1.42656	0.000395669
ITGB1	102.03	-2.26949	4.26761e-09
CAST	101.906	-1.27404	0.00344703
TFB1M	101.851	-1.27911	0.00180675
SLC15A3	101.076	-1.2054	0.00241134
MMP14	100.942	-1.10518	0.00413222
IMMP1L	100.788	-1.77395	8.94278e-05
MBNL1	100.775	-1.48234	0.000204615
ERCC-00074	100.539	-1.35379	0.00155099
NUP153	100.283	-1.85087	1.29967e-06
LOC100505666	99.8537	-1.32859	0.0006419
SPARC	99.4628	-1.16686	0.00213353
ZNF32-AS2	98.8462	-1.35801	0.000900497
ACOT2	98.0071	-1.49444	0.000258769
EIF3A	97.8746	-1.39991	0.000822302
ITGA5	97.5066	-1.20237	0.0013909
ANKRD37	95.8724	-1.03775	0.00731774
LOC100129250	94.7284	-1.00237	0.0165664
CTGF	94.5922	-1.48516	0.000114462
EEF1G	93.917	-1.26354	0.00145327
APLP2	93.6901	-1.20834	0.00140156
TMSB4X	92.5825	-1.76991	5.01451e-06
PRPF31	92.5014	-1.61336	4.58996e-05
ANXA2	92.2766	-1.83779	3.26611e-06
CARD8	91.5358	-1.41163	0.000508739
TMEM91	91.3852	-1.72764	2.23239e-05
ZNF32-AS1	90.6228	-1.54155	7.91962e-05
PLOD2	89.7512	-2.29668	2.08754e-07
IQCH-AS1	89.1531	-1.54955	0.000115423
MASTL	89.0961	-1.55741	0.000126574
LYRM1	88.9965	-1.48386	0.000151559
CCDC66	88.9556	-1.23518	0.00469305
SRSF11	88.5684	-1.81485	4.14861e-05
LNX1	88.2313	-1.66699	4.5528e-05
RPL23A	87.7177	-1.39363	0.000762965
CREB3L4	87.6295	-1.12668	0.00651994
MRRF	86.8757	-1.38422	0.000998274
HPCA	86.4845	-1.2585	0.00136637
CREBBP	86.3824	-1.00127	0.0123232
RPL12	86.3191	-1.32987	0.000959004
LUC7L3	86.2795	-1.41638	0.000616561
RPL4	86.2619	-1.79665	6.87626e-06
MORF4L2-AS1	86.1227	-1.71193	2.81486e-05
TBCB	84.8084	-1.42352	0.000613982
PITPNA-AS1	83.6437	-1.29076	0.0020126
RANBP9	83.458	-1.13791	0.00747495
C1QBP	83.3987	-1.43705	0.00132999
PSMD2	82.8153	-1.23188	0.00248432
RPL26	82.8097	-1.93137	1.11558e-05
ABCE1	82.2564	-1.31459	0.00178847
LOC100505933	81.9855	-1.46541	0.00163852
CLEC14A	81.5679	-1.09393	0.0146858
COG7	81.3714	-1.20683	0.00416265
RPS18	81.35	-1.07471	0.00874452
GTF3A	80.0927	-1.356	0.00212982
TBCK	80.0311	-1.50918	0.000533087
AKTIP	79.9421	-1.56536	0.000248843
LOC100216545	79.6683	-1.61824	9.90041e-05
PIH1D2	79.6433	-2.01638	7.83677e-06
DDX31	79.1933	-1.08003	0.00676623
DPY19L1P1	79.1567	-1.22824	0.00276959
MAST4	78.3882	-1.07809	0.00958105
USP50	77.8335	-1.33192	0.0011852
CDH5	77.712	-1.18554	0.00347989
MICA	76.7747	-1.09371	0.0159777
ANAPC13	76.2828	-1.14645	0.00738615
TOPORS	76.132	-1.70257	0.000206241
MUTYH	76.0121	-1.27585	0.00352574
YARS2	75.215	-1.14907	0.00645237
ZNF341	74.6833	-1.37483	0.000666092
IPP	74.6713	-1.7628	1.42924e-05
ZNF232	74.2378	-1.63816	0.000103227
ZFYVE19	73.9522	-1.01997	0.0221676
TCOF1	73.6938	-1.0424	0.0127649
RPL29	73.2349	-1.21649	0.00439568
NFKBIA	72.3161	-2.9548	3.08509e-10
RBM39	72.3015	-1.02768	0.0221277
CUL5	72.2366	-2.06627	1.00606e-06
NCL	72.0966	-1.28551	0.00188514
CEP170	71.9314	-1.15806	0.00584146
PMS1	70.9425	-1.79516	9.56348e-05
RPL6	70.6379	-2.92578	2.28305e-11
TRAPPC13	70.3078	-1.1289	0.0114968
FSTL1	69.3397	-1.20374	0.0177168
LOXL2	68.9683	-1.0733	0.0172494
GABPB1	67.7408	-1.46302	0.00058647
CBR3-AS1	67.3499	-1.04928	0.0119205
NPRL2	67.2367	-1.50347	0.000478506
MYO1C	67.0783	-1.1438	0.00636029
BRD2	66.9702	-1.08926	0.00845865
LMNA	66.8243	-1.37902	0.001061
ANXA5	66.6805	-2.20866	8.13697e-07
ZNF224	66.6308	-1.16971	0.0105814
C14orf178	66.4824	-1.60429	0.000302213
CXCL16	65.5258	-1.0354	0.0155313
SARNP	65.4379	-1.00925	0.0191125
IL6ST	65.2341	-2.23744	5.56641e-07
RPL7	64.8412	-1.84659	1.62078e-05
RPL35	64.8073	-1.79073	5.33129e-05
RPL13	64.5677	-1.48054	0.000482755
CDC37	64.2415	-1.14218	0.00800545
CGGBP1	63.8877	-1.07355	0.0150067
ANKRD1	63.4376	-1.59716	0.0003209
HOXD8	63.293	-1.05709	0.0128046
MYBBP1A	63.2166	-1.0865	0.0114962
IK	62.4415	-1.07895	0.0139299
LNP1	62.2625	-1.31613	0.00362658
TXNRD1	62.1984	-1.24152	0.0090054
RPS8	62.1429	-1.88673	1.60919e-05
LRRC59	61.6108	-1.49529	0.000756701
ZBTB11	61.414	-1.27934	0.00313602
S1PR1	60.9296	-2.25394	5.86796e-07
KIAA0391	60.4498	-1.22243	0.00420367
RAI14	60.1128	-1.47428	0.000710232
PRKRA	59.9399	-1.14574	0.0159943
DUS2L	59.8529	-1.41292	0.00112838
RPAP1	59.5764	-1.0561	0.017971
SLC35E2B	58.4542	-1.06532	0.0162553
RAB6A	58.1114	-1.15371	0.0137442
HSPD1	58.0472	-1.20422	0.00553885
RPLP0	57.6165	-1.85616	4.17273e-05
TJP1	56.9204	-1.5097	0.000618593
ACSM3	56.9122	-1.85571	0.000144842
CAPS	56.7899	-1.07588	0.0157646
DDX17	56.3181	-1.00006	0.0212094
ATRAID	56.1732	-1.30321	0.00337779
RPS14	56.159	-1.77307	0.00010455
SERBP1	56.0361	-1.11956	0.0117837
TRAPPC4	55.9936	-1.90587	0.000192375
CD59	55.2935	-1.46962	0.00115831
MRPL20	55.2888	-1.02633	0.0234956
RPL36	54.9273	-1.8781	0.000137056
E2F5	54.6392	-1.23459	0.0112985
TUBA1A	54.4163	-1.90496	2.68736e-05
MTRNR2L1	54.2124	-1.03162	0.0244371
RPL5	54.1939	-1.573	0.00103214
LOC100130348	53.8868	-1.38532	0.00184627
BCAT1	53.6703	-2.15595	2.03085e-06
IL1RL1	53.502	-1.61593	0.000309139
BAZ2B	53.3616	-1.40199	0.00385224
XIRP1	53.2132	-1.17031	0.00882301
DRAP1	52.8013	-1.6635	0.000248539
SETD5	52.4757	-1.26846	0.00552969
SMC1A	52.4144	-1.13329	0.0110806
CALU	52.3971	-1.36169	0.00360484
OTUD5	52.1231	-1.08865	0.0240154
EXOC5	52.0436	-1.1766	0.0172977
HNRNPC	52.0134	-1.20921	0.00791776
APLNR	51.7372	-1.3873	0.00301394
NAGPA-AS1	51.5876	-1.23093	0.0102494
C12orf10	51.4563	-1.29037	0.00551247
NUDT5	51.4075	-1.20406	0.00872042
MRPS7	51.3438	-2.23246	1.84662e-06
NAV3	51.0104	-1.06905	0.021204
EEF1D	50.2821	-1.02141	0.0331796
RPS6	50.0497	-1.6786	0.000294168
TRABD	49.8379	-1.04679	0.0244785
ZFYVE16	49.7311	-1.41993	0.00464263
HDAC2	49.7107	-1.39461	0.00364176
MMRN1	49.4375	-1.5654	0.000749176
CEP290	49.1716	-1.40904	0.00393892
CAV1	48.9338	-1.52909	0.00158245
TMA7	48.8737	-1.25616	0.0100007
BRE-AS1	48.8565	-1.39773	0.00252637
CHST11	48.4459	-1.10595	0.0168411
TKT	48.3254	-1.71919	0.000509179
FOXC2	48.2847	-1.08666	0.0206176
YWHAE	48.227	-1.08571	0.0175106
CSDE1	48.0926	-1.41117	0.00282186
BSG	47.8719	-1.01191	0.0282943
TNPO1	47.8387	-1.31452	0.00471426
GNAI2	47.642	-1.63671	0.000395649
INHBA-AS1	47.1465	-1.24406	0.0085307
CCNL1	47.1075	-1.411	0.00476242
PPIG	46.8985	-1.55389	0.00123073
BAG4	46.881	-1.33569	0.00488348
ARPC2	46.8346	-1.28744	0.00643131
LTB	46.5891	-1.14806	0.023467
RPL32	46.5734	-1.0845	0.0192966
IQCK	46.469	-1.2751	0.0110841
ECHDC1	46.4314	-1.45911	0.00333243
ACVRL1	46.4076	-1.13509	0.0139207
PSMD1	46.0587	-1.10971	0.0211497
CEPT1	46.01	-1.3489	0.00608375
SDPR	45.9423	-1.06984	0.0242663
TPM1	45.9032	-1.00373	0.0415786
HSPA4	45.8125	-1.65002	0.00153605
DDX21	45.3876	-1.09821	0.0395568
ELF2	45.2691	-1.19038	0.0150227
ERG	45.1853	-1.14934	0.0202825
P4HB	44.8874	-1.01714	0.0445954
TMEM245	44.6857	-1.51842	0.00135116
HVCN1	44.4187	-1.61182	0.00120895
DDX5	44.3903	-1.49429	0.00256061
BCL10	44.3027	-1.5383	0.00145885
SPCS3	44.2814	-1.51624	0.00184909
GOLGA4	44.1393	-1.34939	0.00716527
VCP	44.125	-1.40668	0.00361502
RPL18	44.0803	-1.49337	0.00309331
INTS8	43.865	-2.2541	5.48393e-06
DLC1	43.7743	-1.24845	0.0111262
WDR33	43.6802	-1.1621	0.0130415
CSRP1	43.4411	-1.16303	0.0137623
POLR2J	43.4162	-1.18552	0.0172943
EIF4G2	43.3744	-1.26171	0.00948322
TUBA1C	43.1071	-2.20077	7.19615e-05
LINC00657	42.9234	-1.33405	0.00484681
ST20	42.8501	-1.52314	0.00208388
VTI1B	42.5657	-1.45057	0.00234247
KTN1	42.5525	-1.24097	0.0253024
TUBA1B	41.8799	-1.9977	4.57234e-05
PRSS23	41.7282	-1.79422	0.000400748
SRGN	41.7161	-2.95877	8.30492e-09
TOMM20L	41.0824	-1.35794	0.00824604
C8orf59	40.6208	-1.79622	0.000267146
PLS3	40.5648	-1.87523	0.000454219
POLR2I	40.4164	-1.67822	0.000965401
TGS1	40.3536	-1.71637	0.000868601
SSRP1	40.1479	-1.03758	0.0314429
EXTL2	40.0751	-2.09632	3.86838e-05
RPS3	40.0702	-1.45598	0.00263359
CCL20	39.7585	-1.20876	0.022993
PTPN12	39.6821	-2.62916	7.85843e-07
ACTL6A	39.4946	-1.33505	0.00947389
SEC31A	38.9154	-1.12108	0.032398
HK1	38.8111	-1.26567	0.0113097
CNOT2	38.7853	-1.82324	0.000369745
CLDN11	38.4815	-1.85258	0.000215493
TPR	38.4764	-1.26817	0.0105185
CAV2	38.4609	-1.78454	0.000399533
RXRB	38.3987	-1.1342	0.0206251
LDHA	38.3246	-1.11026	0.0322891
ACLY	37.9033	-1.67684	0.000754416
ITGAV	37.8316	-1.26675	0.0121919
RPL37	37.5893	-2.14135	5.2803e-05
DNAJC7	37.5585	-1.4812	0.0036445
SENP1	37.4902	-1.1534	0.034017
PRKG1-AS1	37.4036	-1.73439	0.000771742
WARS2	37.3559	-1.26451	0.010817
RPL37A	37.2646	-1.53823	0.0022333
TUSC5	37.2496	-1.16726	0.0200466
RPL23	37.2164	-2.65177	9.45137e-07
IQGAP1	36.9712	-1.46163	0.00733376
RIN2	36.9404	-1.13289	0.0227925
SLC16A1	36.6722	-1.27745	0.0109921
PPM1G	36.3951	-1.1905	0.0180764
ARHGEF2	36.3569	-1.50085	0.00279099
LINC00277	36.3175	-1.01776	0.0411705
SEMA6C	36.1583	-1.05635	0.0325168
NFS1	35.869	-1.5625	0.00382336
SRSF3	35.6699	-1.33351	0.00993619
XRCC5	35.5845	-1.60508	0.00167151
ECM1	35.3012	-1.09543	0.0394543
UBC	35.2975	-1.94391	0.000184903
SRRD	35.1863	-1.05471	0.0349276
RPS5	34.9777	-1.03575	0.0432183
CALM1	34.8905	-1.7582	0.00135791
CAPRIN1	34.802	-1.07443	0.0319414
SLC34A1	34.6667	-1.22911	0.0143442
EHD1	34.6507	-1.14009	0.03871
PNN	34.5264	-1.20545	0.0321653
SHARPIN	34.5184	-1.13256	0.0270894
MCL1	34.0174	-1.40391	0.0146246
LOC100130992	34.0087	-1.1182	0.0312773
RPL10A	33.9192	-1.93505	0.000210599
HDAC10	33.8871	-1.35565	0.0138811
GIMAP4	33.8782	-1.62738	0.00400682
EIF2S3	33.87	-1.18939	0.0324519
ICA1	33.7915	-1.06127	0.0483155
VTI1A	33.66	-1.3074	0.0102623
PRSS54	33.5746	-1.6654	0.00126381
EDN1	33.3044	-1.31041	0.0121815
CCDC111	33.1199	-1.20264	0.0258133
APBA1	32.93	-1.25439	0.0149551
MRPS12	32.9195	-1.63379	0.00199949
MCPH1	32.8889	-1.18629	0.0260751
ARHGAP24	32.8463	-1.50129	0.0047946
SMG7-AS1	32.7536	-1.34923	0.0120755
WBP5	32.7316	-2.72437	9.63886e-07
ZC3HAV1L	32.7234	-2.10851	6.75352e-05
RPL22	32.4949	-1.44805	0.00681092
NOX5	32.4516	-1.03794	0.0419835
CSNK1A1	32.4251	-1.44886	0.007237
MYEOV	32.4218	-1.17523	0.0317393
WDR83OS	32.3008	-1.8008	0.000552555
HFE2	32.2468	-1.38748	0.00857025
MORF4L2	32.0953	-1.76789	0.000780683
AP1AR	32.0369	-1.41301	0.017154
CLIC4	31.9973	-2.60785	1.57939e-06
UBQLN1	31.9019	-1.28738	0.0181294
SETX	31.831	-1.31129	0.0133793
GPN3	31.5622	-1.12701	0.0431239
PRDX1	31.434	-1.20776	0.0289208
CCDC175	31.3776	-2.52158	5.9676e-06
BOD1L1	31.3746	-1.26942	0.0144701
CNPY2	31.3294	-1.48654	0.00458403
FAM32A	31.2524	-1.32148	0.0156874
POLE3	31.1003	-1.09716	0.0420619
LAMC2	31.0263	-1.08607	0.0372483
SLC39A7	30.9404	-1.29925	0.0149701
RPS20	30.706	-2.09903	9.34347e-05
RPL36AL	30.7015	-1.47727	0.00666345
ESM1	30.6355	-1.78662	0.00220107
GNB2L1	30.45	-1.29917	0.0133497
CD9	30.2246	-2.50248	4.69322e-06
SGK1	30.1917	-1.26569	0.015931
RPL24	30.174	-1.33451	0.0132002
BLCAP	30.1292	-1.23198	0.0194675
DYNC1LI2	30.1129	-1.44354	0.00993142
PNISR	30.0565	-1.45157	0.00612642
RASSF2	29.9686	-1.15194	0.0295539
TSPYL5	29.9473	-1.52658	0.00381178
RPS4X	29.9333	-1.54932	0.00368298
RPL8	29.7377	-2.03573	0.00021825
UACA	29.7131	-1.15991	0.0339684
SERP1	29.652	-1.2797	0.0153134
FUBP1	29.6396	-1.06687	0.0486984
TMED2	29.5818	-1.84594	0.000809181
CCT3	29.5718	-1.03253	0.0494837
FNDC3A	29.552	-1.44096	0.00867022
ACTR3	29.4978	-1.25581	0.0171312
DOCK4	29.4753	-1.39462	0.0127977
ZBTB38	29.4736	-1.20188	0.022721
PTPN1	29.4385	-1.5001	0.00575573
MATR3	29.1943	-1.7566	0.00104416
CCNY	29.1668	-1.10761	0.0367082
FAM195A	29.1624	-1.33354	0.0140803
RPS12	29.0731	-2.11157	0.000131231
SLC38A6	29.005	-1.49957	0.00674724
HIGD2A	28.8396	-1.20191	0.0344486
GUCD1	28.8275	-1.08463	0.0401336
KIF13A	28.6845	-1.38023	0.0161982
LOC283038	28.6044	-1.19755	0.0324175
MYLK-AS1	28.4695	-1.41731	0.0079046
PDIA4	28.4164	-1.41537	0.00853443
NDUFS2	28.247	-1.11487	0.0356312
SLC30A1	28.2034	-1.33116	0.0204575
NNMT	27.7667	-1.17224	0.0296016
LGALS1	27.7644	-2.10645	0.000200189
KDM4C	27.6996	-1.19227	0.02966
ANP32A	27.6712	-1.44921	0.0103279
IDH3G	27.655	-1.62499	0.00355998
C1QTNF9B	27.65	-1.89341	0.000651904
BTF3	27.482	-1.65906	0.00302967
RPS28	27.4803	-1.75049	0.00393375
RB1CC1	27.4254	-1.20293	0.0253604
BTG3	27.2953	-1.87743	0.00121336
TGFBR2	27.2854	-1.27172	0.0229176
LYAR	27.0763	-1.62825	0.00517504
XRN2	26.9085	-1.5766	0.00371417
UFSP2	26.9001	-1.2645	0.0264593
NAA20	26.7945	-1.20125	0.0334651
TCF12	26.6267	-1.13091	0.0370632
NAMPT	26.5338	-1.43231	0.0095668
DDX46	26.5242	-1.43179	0.011281
ANO10	26.4082	-1.07769	0.0465529
SRSF5	26.403	-2.37294	3.8227e-05
ARL8A	26.3731	-1.28953	0.0211203
IER5	26.1799	-2.09002	0.000562598
COL5A2	26.1146	-1.61624	0.00441821
OVOL3	26.1132	-1.17151	0.0344134
TCEAL4	26.083	-1.22636	0.0316123
CCAR1	26.0078	-1.17853	0.0327425
EIF3D	25.9147	-1.29985	0.0181452
ANXA1	25.7995	-3.09478	2.60021e-07
HBEGF	25.7262	-1.21038	0.0291861
ICAM2	25.7033	-1.16397	0.0479443
NUFIP1	25.6672	-1.1445	0.044186
OAZ1	25.6058	-2.29253	0.000155424
ADAM9	25.3378	-1.88546	0.0015264
RAB1A	25.2842	-1.63613	0.00378312
NOA1	24.975	-1.2612	0.0277644
FER	24.8992	-1.22838	0.0322523
PROCR	24.8807	-1.64007	0.00333449
GPX1	24.8722	-1.75638	0.00174099
DUSP12	24.8378	-2.17943	0.000144342
GNL2	24.7354	-1.13342	0.0439645
AMPH	24.4793	-1.23167	0.0380309
EIF4A2	24.4253	-1.40686	0.0114798
LOC645513	24.0511	-1.50926	0.00964411
ANKRD42	23.8744	-1.13347	0.0491314
UBB	23.8382	-1.31842	0.0208428
C16orf46	23.569	-1.18484	0.0373189
MGAT2	23.457	-1.34043	0.0176619
IARS	23.4238	-1.25293	0.0381266
CDC123	23.4019	-1.58266	0.00527697
HP07349	23.3057	-1.65411	0.00564885
C1orf110	23.2106	-1.28108	0.0238644
SPG7	23.1251	-1.14289	0.0483696
THOC2	23.0507	-1.28444	0.0236414
SNRPD2	22.9323	-1.34349	0.0215798
JUND	22.9312	-1.14931	0.0427652
FBXW11	22.9143	-1.13367	0.0494663
EEA1	22.5438	-1.19682	0.0371737
SAP30BP	22.4948	-1.75814	0.00243789
RPS9	22.4461	-1.74718	0.00266302
ARPC5	22.3841	-1.59577	0.0061852
2010-09-01	22.2807	-1.66669	0.00408078
USO1	22.2223	-1.16155	0.0437718
KCNK6	22.1254	-1.22223	0.0326158
GPBP1	22.0839	-1.44059	0.0121522
KIF5B	22.0543	-1.45964	0.0107944
C11orf71	21.9383	-1.27377	0.0292876
GLTSCR2	21.8599	-1.25635	0.0350349
SF3B1	21.6814	-1.80502	0.0023081
DNAJA1	21.5896	-1.18621	0.0445567
SUMO1	21.5887	-1.56222	0.00816514
CHD1	21.5661	-1.97895	0.000696218
XPOT	21.5316	-1.41917	0.0135959
PCCA	21.2764	-1.72823	0.00320255
CXCL1	21.2127	-1.74542	0.00350122
NGFRAP1	20.9412	-1.23576	0.0328038
RNF144B	20.7443	-1.64289	0.00487671
ZNF697	20.663	-1.95829	0.00092234
GRIA1	20.5713	-1.18456	0.0486358
RPSA	20.5343	-1.61301	0.00614401
METAP2	20.3808	-2.13187	0.000436872
RALB	20.3334	-1.24405	0.0431277
MIR193A	20.2906	-3.39257	9.76815e-08
HMGN2P46	19.9997	-1.35836	0.0256935
FEZF1-AS1	19.8774	-1.19101	0.044466
TRIM27	19.8653	-1.1594	0.0492952
CD7	19.7817	-1.5027	0.0126168
HYAL3	19.7305	-1.42318	0.0179926
REP15	19.686	-1.72205	0.00868537
EIF4E	19.647	-1.53148	0.00982086
ZNF394	19.4808	-1.25984	0.0341059
ERCC-00004	19.4795	-1.22663	0.0487379
RPS15A	19.3953	-1.28956	0.030871
TUBB4B	19.3731	-1.25457	0.0362628
ZSCAN31	19.3545	-1.61759	0.00740274
CD2AP	19.2166	-1.73299	0.00468702
WDR36	19.1779	-1.70858	0.00413384
ACBD3	19.1507	-1.22606	0.0385532
NUDT7	19.1466	-1.79013	0.00577699
COL8A1	19.0447	-1.68564	0.00598525
MIR3120	18.9737	-1.37251	0.0272604
AMMECR1L	18.9588	-1.31942	0.0295197
DYNLRB1	18.726	-1.58445	0.00821831
MSS51	18.7181	-1.23328	0.0381652
TNFAIP3	18.6873	-1.32989	0.0255173
ATP5A1	18.6803	-2.30694	0.000203978
KARS	18.6493	-1.7984	0.00294096
RIF1	18.6342	-1.33046	0.0261439
MYNN	18.6243	-1.26714	0.0335904
LOC100996455	18.545	-1.27381	0.0325906
CCT7	18.532	-1.22897	0.040715
DNTTIP2	18.4881	-1.36772	0.0225952
PDE4B	18.4506	-1.58389	0.00971024
CNN3	18.4418	-1.25273	0.036095
ZNF407	18.3698	-1.2828	0.0402735
DHX36	18.2661	-1.51439	0.0220454
SURF6	18.2564	-1.27184	0.0422487
LOC340074	18.2228	-1.35137	0.027829
RPL30	18.1952	-1.90221	0.00226321
ADIPOR1	18.0706	-1.24347	0.0404102
IL8	18.0624	-2.85334	1.38031e-05
G3BP2	18.0548	-1.30249	0.0307857
ARHGAP18	18.0034	-1.47949	0.0157843
TDRD3	17.9924	-1.30719	0.0310326
GOLIM4	17.9294	-1.25311	0.0373022
MYL12B	17.9143	-2.12653	0.000596079
ANP32E	17.8231	-1.45817	0.0161853
SPATA5L1	17.8082	-1.29849	0.0330683
PRNP	17.7893	-1.76428	0.00515741
AGPS	17.7667	-1.53129	0.0150087
DKFZp451B082	17.7107	-1.25614	0.0446172
TRAM1	17.6158	-1.2186	0.0452989
PLGRKT	17.6113	-1.41799	0.031695
TM4SF1	17.5991	-1.28493	0.0335297
TP53RK	17.5805	-1.93651	0.00169168
SSBP1	17.4425	-1.48029	0.0203756
WRN	17.4412	-1.51411	0.0174857
C16orf88	17.4347	-1.59627	0.0109422
LOC100289230	17.4346	-1.34618	0.0311486
TLR8-AS1	17.4243	-1.33375	0.0282492
DEXI	17.4138	-2.11775	0.000690194
RPL27	17.2264	-1.59955	0.00940794
MTFP1	17.1917	-1.2872	0.0356093
KIAA1033	17.1741	-1.32928	0.0325129
OR10AD1	17.0092	-1.25182	0.044651
ZMYM6NB	16.9902	-2.56871	8.35642e-05
NOLC1	16.7615	-1.40328	0.0251785
BIRC2	16.7101	-1.615	0.0106409
REM2	16.5023	-1.3861	0.023726
SLBP	16.4569	-1.25067	0.0410307
WDFY1	16.443	-1.20812	0.0497141
PICALM	16.4393	-1.30824	0.0337666
ERBB2IP	16.3244	-1.45919	0.0191314
BTD	16.2584	-2.15323	0.000855741
KIAA1407	16.2027	-1.49858	0.0171292
TWF1	16.2008	-1.38436	0.0269636
MRPS15	16.022	-1.49077	0.0171816
ASUN	15.9566	-1.26043	0.0461439
NOXRED1	15.9526	-1.33819	0.029953
ARHGAP5	15.9454	-1.23823	0.0458081
PSMA4	15.9096	-1.41025	0.0295882
RSRC2	15.8701	-1.66305	0.00931828
LRPPRC	15.7493	-1.77312	0.00463972
SLAIN2	15.6561	-1.22756	0.0473612
CCNG1	15.4681	-1.30983	0.0372453
USP25	15.2712	-1.56762	0.0153397
NARS	15.2586	-1.54106	0.0144739
UBXN4	15.2378	-1.76649	0.00550237
FAM50A	15.0766	-1.26138	0.0462344
TNFRSF10D	15.045	-1.99344	0.00171534
NAP1L4	14.9558	-1.89319	0.00284959
TDG	14.9386	-1.59999	0.013727
ACAA2	14.7517	-1.43285	0.022544
RBM28	14.6521	-1.32745	0.0410417
PSMC2	14.6297	-1.5032	0.017739
FAM107B	14.5332	-1.33397	0.033813
CCT6A	14.4337	-1.38716	0.0313864
COQ10B	14.4186	-1.5485	0.0169348
KLF4	14.2952	-2.36337	0.00031724
CHCHD2	14.1979	-1.80995	0.00456825
C2orf72	14.0347	-1.31366	0.0448511
STBD1	13.8559	-1.49413	0.0189526
GNG11	13.789	-2.35679	0.000404425
LOC400620	13.7852	-1.29843	0.0441704
DDX52	13.6732	-1.78077	0.00764771
CD320	13.5144	-1.4564	0.0241667
ARMCX3	13.512	-2.30127	0.000458529
SNX9	13.4521	-1.72469	0.0087807
PDP1	13.3989	-1.78842	0.00577027
WDR11	13.3603	-1.41993	0.0270023
CLK2P	13.3144	-1.51183	0.0204044
SERINC1	13.2648	-1.73745	0.0091658
DDX10	13.2476	-1.58399	0.0142795
EPRS	13.2412	-1.42268	0.0300225
ZMYM6	13.1953	-1.59376	0.013561
LRIG2	12.9287	-1.31769	0.0414911
ZNF281	12.6439	-1.5409	0.0180142
ELTD1	12.4236	-1.41575	0.0311897
KIAA0020	12.1989	-1.95841	0.00321413
PUM2	12.1288	-1.29542	0.0466413
C6orf52	12.0197	-1.42073	0.0313048
HINT1	12.0057	-1.80064	0.00689017
LINC00538	11.9797	-1.58978	0.0186157
ERCC-00043	11.9147	-1.65221	0.0141247
LOC728724	11.8196	-1.82746	0.00598439
BMX	11.7448	-2.21622	0.000982522
RPL34	11.7278	-1.42047	0.0316512
ENO1-AS1	11.6457	-1.59136	0.0160691
SAR1A	11.5926	-1.92263	0.00415068
HIST1H2BC	11.5173	-1.48479	0.028203
CUL3	11.4524	-1.47598	0.0251156
SRPX	11.4434	-1.32628	0.0466051
ACYP2	11.4248	-1.92968	0.00464622
HIST4H4	11.423	-2.0173	0.00268565
RHOV	11.4096	-1.56729	0.0177465
DKFZp686D0853	11.3633	-1.37346	0.0374003
COPB1	11.3213	-1.45999	0.0270288
PKIA	11.2482	-2.17006	0.00123606
EID1	11.1973	-1.67067	0.0133236
SNHG10	11.1891	-1.47166	0.0312493
SLC16A9	11.1509	-1.47717	0.0275791
SCARNA7	11.1505	-2.23605	0.00111255
NOP58	11.1175	-1.6215	0.0170544
CYTIP	11.0919	-2.11257	0.00183467
TAF1B	11.0328	-1.44777	0.0346206
RPL38	10.8602	-2.57247	0.000182628
DHX29	10.8248	-1.37615	0.0388389
KLF10	10.7868	-1.64627	0.0175683
LINC00521	10.7828	-1.46164	0.0285828
BRK1	10.7716	-1.38898	0.0369632
GSTP1	10.7419	-1.34638	0.0475164
CHORDC1	10.7233	-1.31731	0.0494418
C5orf15	10.6153	-1.34235	0.0459919
LOC728431	10.5511	-1.34569	0.0475484
GLRX3	10.4745	-1.68173	0.0137518
CREG2	10.3392	-2.42462	0.000471859
DNAJB4	10.2105	-1.72833	0.0104521
CCL2	9.997	-1.33014	0.0500709
SELE	9.48689	-1.25212	0.0720765
FOS	9.37198	-1.22248	0.0727428

## Sheet: 30min_TNFa_vs_C646_upregulated
gene name	baseMean	log2FoldChange	pvalue
LDLRAD2	9809.37	1.05091	1.59423e-05
LOC441081	946.784	1.17767	2.17015e-05
L2HGDH	801.641	1.04081	0.000197476
CDH20	793.935	1.01001	0.00066591
SDCBP2-AS1	665.099	1.72105	1.55565e-08
NUMA1	535.279	1.32007	2.13447e-06
MYSM1	530.857	1.29844	5.42164e-05
PFN1P2	522.207	1.20196	0.000179883
XRCC3	519.799	1.29211	2.98466e-05
PLAC4	423.922	1.79148	2.06797e-09
FLJ38109	422.469	1.11939	0.000116113
TMEM14E	412.363	1.61353	2.9525e-07
ZNF814	395.164	1.34265	2.22638e-05
SPON1	376.596	1.2948	0.000104621
PCGF3	368.803	1.5511	1.92598e-05
FAM22D	365.523	1.10275	0.000157836
EML6	322.608	1.92881	4.01821e-09
FAM115C	317.643	1.28618	1.21995e-05
VPS9D1	278.193	1.37552	5.41302e-06
CLOCK	259.333	1.10897	0.000521243
CEP95	258.881	1.2338	0.000140151
LRRTM2	255.227	1.57276	8.25822e-05
METTL15	236.377	1.25879	0.000154033
PLEKHG1	234.218	2.04412	3.26107e-09
RNF213	229.364	1.14229	0.000247615
GNE	225.918	1.32573	3.17256e-05
PDZD2	224.63	1.2257	0.000336254
LOC100131496	218.807	1.89739	8.56017e-08
FAM196A	218.073	2.19262	3.45689e-08
C21orf62	215.449	1.00871	0.00160937
ANKH	208.759	1.34452	2.50997e-05
FAM22G	208.15	1.22014	0.000169357
MEGF11	205.835	1.95134	1.04036e-08
SLC22A23	204.036	1.11921	0.000550378
ZHX3	203.461	1.69995	1.31383e-07
ANGPT2	203.452	1.11244	0.00386542
FAM65C	200.593	2.02523	2.66893e-08
CCDC97	190.763	1.51089	3.22415e-06
SCUBE3	178.077	1.48708	7.44071e-06
SLC37A2	176.559	1.39426	2.65229e-05
TOR3A	175.951	1.68715	6.8028e-07
C5orf4	172.432	2.02963	9.15758e-09
C9orf131	170.65	1.37569	3.29111e-05
COA1	169.987	1.70047	6.67289e-07
PRR26	169.829	2.52178	6.09431e-13
LRRC4	168.947	2.0751	1.76333e-09
R3HCC1	166.838	1.61018	3.8995e-06
SLC6A4	166.552	1.22803	0.000321617
SLC24A1	165.648	1.32276	8.25699e-05
FDPSL2A	163.328	1.00027	0.00387907
CDH23	163.079	1.18264	0.000418683
FAM22A	163.041	2.11941	4.72599e-09
MXRA7	162.733	1.18119	0.000431802
CHRNB2	156.257	1.2092	0.000381299
APPL2	154.409	1.75248	7.22393e-07
FLJ42627	152.704	1.13537	0.00111845
KLB	152.542	1.13369	0.00100058
ZKSCAN3	151.983	1.13736	0.0011346
FGF5	151.462	1.27386	0.000252631
TCF7	150.221	1.85739	1.40818e-07
NRIP2	149.994	1.24153	0.000463431
SUN2	149.146	1.0778	0.0016271
DLD	149.119	2.25959	3.44082e-09
PRUNE2	148.993	1.01519	0.00278134
EFHC1	148.797	1.60615	3.60082e-06
LRP2BP	148.352	1.15196	0.00194767
LOC729732	147.945	1.14205	0.000902368
MCC	147.344	1.06376	0.0033054
KLRD1	147.206	1.0469	0.00218778
FLJ42102	146.392	1.05953	0.00240415
CRLF3	145.468	1.50716	2.02676e-05
FARP1	145.228	1.11453	0.0016891
TTPAL	144.811	2.02348	1.17121e-08
CARHSP1	143.973	1.73738	7.17172e-07
CBL	143.026	1.53112	0.000112189
COL18A1-AS1	142.525	2.09822	5.50537e-08
AK2	142.166	1.73311	4.01755e-06
NF2	140.919	1.02774	0.00382349
PVRIG	139.627	1.28062	0.00147461
CC2D2A	138.37	1.09001	0.00197944
NR2F2	137.985	1.0495	0.00662472
KCNJ13	137.828	1.74205	6.06622e-06
SPDYE5	136.882	2.14931	4.67764e-09
UBE2N	136.781	1.67972	2.54632e-06
FSIP1	136.159	2.27907	0.00120158
LOC148696	135.863	1.66103	2.94717e-06
UBE2R2	134.592	1.22111	0.000735319
CARD14	133.793	1.43416	6.56874e-05
SLC48A1	133.382	1.17975	0.00073323
FILIP1L	132.034	1.05174	0.00498134
EPHA1	131.645	2.91666	3.55142e-14
PLEKHG6	131.224	1.70698	7.33425e-06
NNAT	130.193	1.77687	1.01075e-06
FAM20A	130.013	1.37723	0.000332484
MYH10	127.249	1.42135	7.90259e-05
C3orf65	126.755	3.13015	6.52993e-13
RPP30	126.397	2.07808	3.43388e-07
WNT4	126.374	1.14901	0.00152
JMJD1C-AS1	125.832	1.15298	0.00439419
MAPT	125.061	1.53847	1.90786e-05
ST3GAL6	123.735	1.06843	0.00386263
PPL	123.716	2.11849	1.48832e-08
TMEM44-AS1	123.193	1.11114	0.00340992
APOL1	121.332	1.3813	0.000158443
TRIM13	118.073	1.71715	6.95555e-06
OR7E12P	117.613	1.20586	0.000958673
KDELR3	117.588	1.30636	0.000857543
CD37	117.439	1.28457	0.00132638
BAIAP2L1	117.009	1.07174	0.00431347
DDX51	115.535	1.17389	0.00194831
ASB16	115.393	1.09327	0.00287033
SLC35B2	113.601	1.68665	6.67673e-06
SLFNL1	113.155	1.9774	2.39716e-06
PROX2	112.125	1.92312	3.90504e-06
SHC3	110.982	1.85466	8.12122e-07
ERVFRD-1	107.592	1.19786	0.00178933
BTBD9	107.081	1.98696	1.86855e-07
RGAG4	106.553	1.54717	4.36488e-05
FBXO41	106.47	1.62477	1.53716e-05
MAPK10	105.631	1.74884	2.19378e-05
PPIEL	105.185	1.02973	0.00580807
GHRL	103.295	1.72719	1.96281e-05
RASGRP1	103.068	1.83999	3.18987e-06
TREH	102.381	1.5512	7.61808e-05
WDR11-AS1	102.036	2.41148	1.49132e-09
LOC440028	101.97	1.56338	9.8696e-05
SMIM14	100.843	1.02266	0.00631679
OR7E2P	100.53	2.32109	4.28694e-07
CELF2-AS2	100.087	2.02786	5.00067e-07
TRIM14	98.5721	1.42503	0.000260308
ADAM22	98.4967	1.14038	0.00261996
SLC13A4	98.3526	1.27573	0.000970491
GLIPR1L2	98.005	1.09015	0.00438458
RBPMS	97.1011	1.59361	3.64407e-05
PCDH11X	96.0723	1.14962	0.00303527
ECT2	95.9008	1.04534	0.00957525
CFB	95.8995	1.25229	0.00120033
EFCAB13	95.5913	1.209	0.00385605
HTR2B	95.2319	1.83064	8.29339e-06
GALNT11	95.053	1.42687	0.000216322
ALK	93.958	1.14945	0.00318929
MANEAL	93.8612	1.13531	0.00384129
MIR600HG	93.0663	1.47242	0.000262536
UBAP2	92.8708	1.11292	0.00366331
OSMR	91.7536	1.08546	0.00563864
LINC00672	91.7191	1.1156	0.00416799
DCDC2B	91.6313	1.25879	0.00286897
CYB5D1	91.1867	1.1917	0.00207003
GZF1	90.6881	1.56774	0.00026757
PCSK1	90.3631	1.60925	4.18342e-05
CLDN20	90.2705	2.02812	9.97341e-07
PGAM5	89.4403	1.30117	0.000916322
SYT2	88.8969	1.13729	0.0039113
FBXL2	88.3217	1.68017	7.87001e-05
B3GALT2	88.1579	1.44695	0.00102808
FAM184B	87.8814	1.05148	0.00739126
CYP3A5	87.8277	1.3581	0.00179057
PRH2	87.1425	1.04624	0.0111732
LOC286437	87.0924	1.67803	5.06209e-05
RBM4B	85.7121	2.30502	3.0618e-08
ZNF483	85.6577	1.07035	0.00641975
NDRG4	85.4526	1.07927	0.0069566
AIDA	85.4304	1.07703	0.0062107
SMCR5	85.2696	3.13201	4.70592e-12
LOC100499194	85.0831	1.49326	0.000269985
ATP8B1	85.0376	1.84029	9.30859e-06
AGPAT2	85.0045	1.63845	0.0179519
TEAD3	84.7217	1.63528	6.10375e-05
SLC7A7	84.7017	1.28309	0.00119291
PLIN4	84.2073	1.92231	7.07851e-06
FAM229B	83.6636	1.05478	0.0195126
FKBP1AP1	83.299	2.71749	7.72277e-10
OTUB2	83.264	1.2485	0.00244053
EML4	82.9836	1.59931	0.000261288
TSSK3	82.8977	1.45006	0.000316015
SPDYE1	82.7008	2.01366	2.10721e-06
LOC100506385	82.5605	1.83681	7.28331e-06
GPER	80.9994	1.28434	0.00170139
DAGLB	80.9648	1.06864	0.00740535
KIAA2013	80.7949	1.327	0.00194696
LENG9	79.8826	1.23311	0.00504207
UPK1B	79.6846	1.26486	0.00200272
SEZ6	79.3576	1.00916	0.0119322
TRAF4	78.8876	1.47151	0.000728322
NSUN5P2	78.6726	1.44078	0.00127682
AMIGO3	78.2808	1.4532	0.000451864
SMIM5	78.275	1.35432	0.00151012
ATXN2	78.2623	1.33654	0.00118166
ASXL1	77.956	2.08831	6.25655e-07
TMED5	77.2687	1.11007	0.00915368
LOC730183	76.9729	1.58636	0.000107704
GNRHR	76.9417	1.32384	0.00405197
TGFB3	76.73	1.14365	0.00686656
CCRN4L	76.0025	1.1606	0.00565309
GP1BA	75.5613	1.25281	0.00242485
LINC00507	75.1292	1.16365	0.00521164
SOX12	74.6909	1.07957	0.0112983
BTBD18	74.6158	1.25792	0.00222912
RAB6B	74.1247	1.15875	0.00681978
SLC12A5	73.9701	1.11276	0.0104675
MAGI3	73.969	1.40241	0.000667772
ADCY1	73.324	1.26376	0.00220138
IRF1	73.2665	1.11881	0.00627798
BOLA3-AS1	73.2233	1.29381	0.00262297
C2orf68	73.0884	1.31178	0.00461582
LPAR6	72.9269	1.44637	0.00286973
PDXDC1	72.8656	1.63751	0.000268106
CCDC65	72.7369	1.85243	2.61631e-05
FEZ2	72.6185	1.25671	0.00284122
CCSAP	72.5023	1.15836	0.00669898
OAZ2	71.837	1.27493	0.00752195
C6orf1	71.7205	1.06989	0.0153534
MYO1H	71.2683	1.31121	0.00227177
CNTRL	71.0862	1.73923	0.000134688
ADA	70.4935	1.24173	0.00323067
COCH	70.4483	1.56229	0.000266972
IL12RB2	70.3947	1.42689	0.000686233
FLJ46906	69.9814	1.41935	0.000751389
FLRT1	69.749	2.07546	2.31553e-06
NSUN7	69.715	1.6918	7.04982e-05
TMEM180	69.6604	1.41871	0.00123789
CAPN3	69.2892	1.18828	0.00494283
ZNF552	69.2721	1.5013	0.000545846
RETSAT	69.0223	1.85154	1.62994e-05
PPM1M	68.7455	1.44943	0.000880857
UBXN2B	68.6139	1.98518	1.68819e-05
ZBTB5	68.4969	2.13983	9.21464e-07
RNF24	68.3436	3.12441	4.6655e-11
KLHL29	68.04	1.68314	9.67445e-05
GPR183	67.4141	1.49555	0.000650277
CMTM4	67.3011	2.02355	3.61002e-06
PPT1	67.0595	1.80569	3.66708e-05
TSSK4	66.9424	2.08724	3.24375e-06
CNOT11	66.7633	2.09641	1.92244e-06
DLK2	66.6417	1.0853	0.0148317
ZBTB2	66.6374	1.33571	0.00159816
C2orf88	66.464	1.44159	0.00103629
MFSD4	66.3758	1.37299	0.00122455
CLDN10	66.3341	1.12778	0.00778223
AGPAT4	66.1819	1.04467	0.0131975
COL18A1-AS2	66.0515	1.1822	0.0148347
SYNM	65.8798	1.68001	0.000315761
CSPG4	65.8566	1.0458	0.0144673
ANGPTL1	65.7993	1.44075	0.00188984
NAIP	65.2844	2.23421	2.09082e-06
RAD52	65.1438	1.20999	0.0119038
EPGN	64.8429	1.05608	0.0126266
LOXL4	64.6468	1.36405	0.00327961
LOC100506394	64.4357	1.26646	0.00308883
NXPH3	64.3191	1.21112	0.00996903
AAGAB	64.1914	1.72767	0.000127036
RPL23AP64	63.4839	1.23325	0.00705975
INO80C	63.406	1.0622	0.0129419
EPN2-AS1	63.3041	2.69551	3.37279e-08
LOC441454	63.1331	1.35727	0.00184762
FKBP14	63.104	1.03863	0.0151347
MLANA	62.327	1.32571	0.00259999
LINC00854	62.2112	1.39879	0.0012991
LOC253039	62.013	1.074	0.0121248
FANCC	61.7346	1.83369	3.30689e-05
SGSM3	61.4422	1.20854	0.00605671
PIP5K1P1	61.4245	1.67078	0.000168924
RXFP4	61.3537	1.73095	0.000253967
LOC100507091	61.0456	2.00233	3.16532e-05
TRAP1	60.8679	1.15024	0.0150393
SLC16A4	60.6509	1.56838	0.000454828
MAK	60.4165	1.72522	0.000131747
MAP3K14-AS1	60.3638	1.08453	0.0123735
GLDC	60.1506	2.16019	2.33507e-06
LHFPL4	60.1262	1.37831	0.00168331
NPHS1	60.103	1.06247	0.015594
OXNAD1	60.038	1.13813	0.0098396
GPLD1	59.9551	1.03585	0.0250802
AMT	59.5611	1.44815	0.00113115
CNTN2	59.0449	1.09687	0.0143713
SPDYE6	58.9928	2.09767	3.00179e-05
LOC100128531	58.8756	1.33275	0.0033772
LOC284837	58.8525	1.2009	0.00922196
CEACAM16	58.7632	1.40091	0.00158687
TRIM45	58.7122	1.24601	0.00656522
EVI2B	58.7083	1.75985	0.000113761
PPP2R3A	58.2228	1.21436	0.0113306
ERCC6L	58.0934	1.79827	0.000293346
CDHR5	57.9599	1.3765	0.00180297
MLH3	57.8976	1.17047	0.00757308
TTYH1	57.6966	1.37649	0.00221067
FNBP1L	57.5505	1.16087	0.0123945
SH2D3A	57.1126	1.33546	0.00315817
GOLGA1	57.019	1.03698	0.0239701
BTBD6	56.8167	2.61988	4.77425e-08
NKPD1	56.2034	1.31716	0.00405828
NASP	56.1969	1.77596	0.000182374
CDS1	56.1921	1.28915	0.00822818
EVI2A	55.5798	2.25872	2.52025e-06
PP7080	55.5436	1.7687	0.000124954
TMEM150A	55.3579	1.18946	0.00792558
C5orf55	55.1647	1.05867	0.0180352
GPR68	55.1488	1.17721	0.00853062
MOCS2	55.0426	1.4395	0.00220406
SLC38A4	54.8878	1.6582	0.000533818
VASN	54.6273	1.02145	0.0305793
CCDC121	54.5185	2.19187	6.27908e-06
UQCRQ	53.9993	1.55444	0.000617993
KCTD19	53.9794	1.14703	0.0111967
CDK13	53.9609	1.02406	0.0385638
CD160	53.869	1.43573	0.00181617
SURF1	53.5887	1.30372	0.00473154
RUFY1	53.5553	1.52886	0.000803199
RRNAD1	53.221	1.39982	0.00208674
WDR34	53.1534	1.07838	0.0291611
LOC100506655	53.0056	1.2609	0.00746942
PABPC1P2	52.8855	1.16236	0.0104272
C19orf80	52.1942	1.41516	0.00345694
CSF1R	52.1605	1.2474	0.00745495
ASB8	51.9808	1.44364	0.00176226
IDNK	51.799	1.50811	0.00212266
LOC100130954	51.7014	1.21577	0.00813727
APCDD1L	51.64	1.14268	0.0163765
LOC100287036	51.4999	2.68659	7.53983e-08
CTSH	51.4293	1.63914	0.000487302
LIG3	51.4083	1.4824	0.00149622
COQ10A	51.3768	1.87804	6.06814e-05
TMPRSS6	51.1176	1.02851	0.0269176
LOC285740	51.1167	2.99566	4.51871e-09
RNF13	51.0667	1.08471	0.0235576
GPR37L1	50.6372	1.74012	0.000199993
WNT2B	50.0254	1.21647	0.00803657
ANGPTL7	49.8975	1.4552	0.00244164
RNH1	49.6966	1.44887	0.00332371
OSBP2	49.4852	1.30295	0.00713457
LOC100505658	49.2582	1.54787	0.0027837
SIRT1	49.1611	1.31282	0.00605293
ATP2C2	49.1326	1.71388	0.000426969
IFFO1	49.0783	1.75094	0.000251998
LIN28A	49.0593	1.14758	0.0125238
IRAK4	49.0126	1.07008	0.0254951
ALG12	48.9746	1.5247	0.00136615
ZC3H12B	48.9055	1.3933	0.00377211
PDGFRL	48.904	1.52549	0.00344403
CCNC	48.8239	1.30925	0.00586727
C17orf66	48.7196	1.213	0.00940861
KCNV2	48.6585	1.52236	0.00123675
ACTL10	48.6149	1.44028	0.00376972
ARHGEF4	48.3348	1.7757	0.000270978
TATDN1	48.3212	1.19813	0.014431
C4orf3	48.2565	1.78196	0.000343075
CXCR6	48.2484	1.76717	0.000473177
AMZ1	48.1914	1.61042	0.00110091
DENND2D	48.1377	1.2852	0.00795722
C9orf84	48.0254	1.26887	0.0113251
DFFB	47.8952	1.17739	0.013437
IRF7	47.8032	1.00598	0.0390973
KLHL12	47.6871	1.48614	0.00161279
FAM168A	47.6668	1.09455	0.0251685
GPR18	47.6187	2.29589	6.83566e-06
MAP6D1	47.6135	1.90693	0.000127057
PRSS48	47.5952	2.97341	1.54479e-08
DUXA	47.3125	1.12431	0.0176376
ANKRD61	47.2129	2.46763	8.72975e-07
GNPDA1	47.049	1.59447	0.00110865
ITPK1-AS1	46.8783	1.25391	0.00775457
C12orf73	46.7199	1.42347	0.00315611
EPHX1	46.7178	1.02289	0.03248
FKBP9	46.4613	1.03771	0.0295987
NSG1	46.4167	1.01896	0.0374101
LDLRAD4	46.3782	1.3724	0.00396739
CKS1B	46.2997	2.09126	7.32082e-05
BRD7P3	46.2899	1.54729	0.00171727
FOXA1	46.2332	1.18729	0.0272012
MREG	46.1979	1.10003	0.0213291
SEC13	46.1544	1.63504	0.00071551
B9D2	45.9566	1.04483	0.0415205
EMILIN2	45.8353	1.15827	0.0167872
ATAD5	45.8133	1.62996	0.00387501
ZNF154	45.773	1.34924	0.00486779
FAM186B	45.7633	1.80527	0.000188176
DFNA5	45.728	1.03576	0.0274521
LOC392364	45.6667	1.36675	0.00432369
SETMAR	45.3737	1.1719	0.015988
LOC389332	45.3224	2.62598	2.50913e-07
DAPP1	45.2843	1.56807	0.00140451
NMNAT1	45.1373	1.06707	0.0269953
BEST4	44.9097	1.9678	0.000224597
MBP	44.8509	1.11753	0.0192065
COL9A2	44.772	1.08579	0.022534
POR	44.6664	1.02537	0.0307056
SERPIND1	44.3993	1.49021	0.00259141
PAQR8	44.2936	1.26691	0.00779361
PI16	44.2706	1.42501	0.00301405
SENP2	44.0319	1.52924	0.0015648
LOC100507066	43.6235	1.7158	0.000506138
RWDD4	43.3723	2.17434	1.32624e-05
IRF5	42.9878	1.26805	0.00937414
NRG4	42.8495	1.27914	0.00953626
AQP11	42.6303	1.50942	0.0075245
ABHD15	42.5484	1.29916	0.00705566
DDX49	42.5183	1.00025	0.0388046
PRORSD1P	42.4353	1.43603	0.00435564
S1PR3	42.0461	1.13196	0.0194259
SMYD2	41.8658	1.30723	0.00857237
AMN	41.8141	1.56405	0.00295933
CKMT2	41.7481	1.26542	0.00894922
C16orf71	41.7256	1.1171	0.0319181
ITGB1BP1	41.6205	1.13815	0.0255326
LOC100505716	41.3585	1.69594	0.000672295
FOXK2	41.3101	1.21323	0.0134777
SEPT7P2	41.3043	1.03238	0.0328289
ZNF556	41.1194	1.103	0.0305839
LEAP2	41.1024	1.41686	0.00757859
SRA1	41.0022	1.52045	0.00222309
PMEL	40.7098	2.18425	2.84473e-05
ORC6	40.7036	1.0866	0.0260887
SUMO1P3	40.5155	1.99599	9.51287e-05
METTL2B	40.3296	1.16824	0.0198113
TMEM41A	40.0445	1.02784	0.0409465
CCDC28B	39.8516	1.39934	0.0112826
FRRS1	39.5908	1.0981	0.0289357
MCCD1	39.4437	1.27938	0.00932037
CCDC74B-AS1	39.4342	1.19064	0.0171826
NRON	39.3834	1.91137	0.000181903
TBC1D20	39.3809	1.07934	0.0287491
PNO1	39.2712	1.33891	0.00747158
PIGH	39.2553	1.15365	0.0188622
RAB42	39.2544	1.28872	0.0104607
TECR	39.1641	1.17509	0.0200227
PPP2R5A	38.9967	1.01176	0.0491788
ZBTB12	38.9679	1.75389	0.000510986
NUP50	38.9052	1.11936	0.023683
ZBTB48	38.7273	1.08416	0.0290433
CCRL1	38.5086	1.72885	0.0012177
AMMECR1	38.3712	1.23815	0.0136014
ANGPTL3	38.2468	1.08348	0.0363565
ZNF554	38.2428	1.12061	0.0239352
GOPC	38.1845	1.55211	0.00799899
RASGRP3	38.1617	1.13877	0.02618
TACR1	38.136	1.59207	0.00250848
HOXA2	38.0067	1.29295	0.0103631
EGFEM1P	37.994	1.03774	0.0392786
C1orf35	37.9809	2.09044	6.4611e-05
FAM117B	37.9566	1.48431	0.00325019
PPFIA1	37.4558	1.19236	0.0204091
CXCR5	37.4377	1.39979	0.00704011
GPX2	37.2599	2.16566	0.000118547
SERPINF1	37.1822	1.11141	0.0330224
ARHGAP44	37.1484	1.63851	0.00129587
MRS2P2	37.0556	1.02979	0.0389463
ZNF750	36.9096	2.9727	1.06931e-07
ATG10	36.8059	1.13527	0.0236516
KIF3A	36.7516	1.16074	0.0210911
ECT2L	36.64	1.68106	0.00113611
ZNF506	36.5452	1.03877	0.0407916
PSTPIP1	36.4501	1.15371	0.0320309
SLC35A1	36.4085	1.29798	0.0140732
C9orf163	36.3792	2.30165	3.04905e-05
RSPH4A	36.0268	1.24115	0.0180029
ELAVL3	35.9476	1.07692	0.0325755
LOC641367	35.8793	1.15596	0.0472374
LOC100130880	35.8695	2.15595	6.00642e-05
LOC100133920	35.8283	1.12929	0.0275076
GPR82	35.737	1.17031	0.0211754
CKB	35.7286	1.23725	0.014497
LOC100131096	35.724	1.15895	0.0369379
CALHM1	35.6443	1.29655	0.0107201
NCF2	35.3351	1.29813	0.0111225
DDHD2	35.3222	1.22149	0.0374348
NAV2-AS5	35.0247	1.33279	0.00906835
TRPM5	35.0011	1.26562	0.0131111
MARVELD3	34.8999	1.09498	0.0340809
LOC153684	34.8793	1.60532	0.00190962
UNC50	34.6914	1.57354	0.00246299
CD5	34.4608	1.2411	0.016768
LYPLA2	34.0126	1.21512	0.0206297
NUP85	33.9728	1.19579	0.0209136
TAC4	33.8958	1.75587	0.00249469
PLEK2	33.773	2.31234	2.35708e-05
GK3P	33.7721	1.28133	0.0150972
NPPA	33.5373	1.61307	0.0031752
SASS6	33.5171	1.14697	0.0463326
ATRIP	33.5044	1.18148	0.0282438
RARRES1	33.4529	2.01152	0.00017246
MAGI1-AS1	33.4212	2.1696	0.000110578
LOC100303749	33.3568	1.32147	0.0116677
HAS1	33.18	1.25508	0.0174621
LOC285758	33.1156	1.52927	0.00450487
KCTD4	33.1109	1.08092	0.039183
BNIP3	32.9724	1.33209	0.0116164
MRPL16	32.9686	1.26304	0.0230571
RMND1	32.7537	1.41372	0.0100704
ACE2	32.7251	1.69012	0.00446352
TCIRG1	32.6496	1.07767	0.0384963
ACAT1	32.3887	1.66662	0.00189341
LOC729177	32.3097	1.22125	0.0192257
PQLC3	32.2744	1.47417	0.00640812
CLCN5	32.2411	1.32464	0.0152237
SRPK3	32.1104	1.44128	0.0104489
CYP2W1	31.9167	1.37614	0.00942283
CA12	31.7377	1.13839	0.0395032
LOC283693	31.6197	1.12945	0.0322309
HLA-J	31.4484	1.12338	0.039291
NTAN1	31.327	1.44462	0.00804487
OR5C1	31.2289	1.23148	0.0308895
ARMC10	31.1973	1.16775	0.0303571
C1orf172	31.0956	1.50643	0.00748574
COL6A4P2	30.7473	1.10156	0.0362413
HTR3E	30.6945	1.47651	0.00617455
WDSUB1	30.6742	1.12669	0.0349466
KLHDC9	30.6287	1.21316	0.0226378
PTPN2	30.6105	1.20253	0.0278537
STXBP5L	30.5622	1.55726	0.00379452
TUBA3D	30.4717	1.61559	0.00426212
ADM2	30.4592	1.2976	0.0146975
IQCG	30.3575	1.59935	0.00538573
ARHGEF38	30.2918	1.31248	0.0171546
SGPP2	30.2725	1.11905	0.046952
LMO3	30.1606	1.36089	0.0147441
CARKD	30.0918	1.34678	0.0131431
ATXN3	29.9233	1.21368	0.023321
H1FOO	29.8369	2.06228	0.000215305
NDUFAF7	29.8014	1.16795	0.0284985
ARL13A	29.7043	1.40296	0.00993361
IGSF6	29.6797	1.29644	0.0190661
CERS5	29.6426	1.82107	0.00105619
B3GNTL1	29.6279	2.03177	0.000261129
LOC148709	29.4601	1.17384	0.0300055
IDH2	29.3977	1.50116	0.00629315
CRYBA1	29.1965	3.549	1.2532e-08
SPATA21	29.1796	2.04082	0.000257011
LCA5L	29.0828	1.1949	0.0317123
CYC1	28.9812	1.09851	0.0412416
BAP1	28.9577	1.22883	0.0235529
GPR146	28.8457	1.14551	0.0401662
GLB1L	28.7582	1.29413	0.0207586
PCDH15	28.69	1.09006	0.0445224
CCR7	28.5683	1.23055	0.0265438
PSORS1C2	28.4514	1.19905	0.026147
CAMK4	28.3595	1.52528	0.0129653
CABYR	28.3491	1.50533	0.00641618
DCLK2	28.3302	1.23075	0.0336671
MED19	28.2236	1.60095	0.00429699
PARP2	27.9924	1.37889	0.0131589
ANKRD53	27.9356	1.5758	0.00443549
TMEM204	27.8209	2.02835	0.000407007
IGF1	27.5594	1.31976	0.0159113
C15orf27	27.4048	1.21365	0.025802
DSCR9	27.2818	1.70058	0.00238893
AMBP	27.1607	1.6966	0.00287044
CDC42SE2	27.1231	1.53728	0.00734272
ARGFXP2	26.8329	1.53151	0.00835399
RASGEF1A	26.6877	1.35997	0.0159786
DNAJA4	26.6802	1.237	0.0277911
C17orf78	26.566	1.19198	0.0415768
BMPR1A	26.5186	1.33654	0.0180594
SELM	26.4742	1.72526	0.00228033
CAMK2A	26.3311	1.22437	0.0266965
WDR76	26.3198	1.54579	0.00593144
PPP4R2	26.2986	1.29661	0.0225485
SLC47A2	26.2972	1.18222	0.0374158
CECR6	26.2403	1.13741	0.0441477
CCDC104	25.9628	1.24127	0.0248385
FOXN3-AS2	25.8667	3.05709	8.24698e-07
TMEM208	25.8074	2.70126	7.49987e-06
NIF3L1	25.7822	1.10058	0.0475586
SLC25A42	25.7791	1.37102	0.0147157
OGFRL1	25.769	1.66851	0.00365166
AAAS	25.708	1.39542	0.0128844
FAM206A	25.6976	1.78866	0.00161128
COL6A6	25.56	1.11634	0.0469571
SNORA70G	25.5013	2.22515	0.000151322
C1orf85	25.4392	1.31493	0.018491
LRRC41	25.3536	1.45323	0.0109289
NODAL	25.2983	2.17477	0.00017871
LRRN4	25.2726	2.03565	0.000568114
ARID5A	25.1897	1.14303	0.0411145
TNIP2	24.7709	1.57156	0.00566242
TMEM175	24.5807	1.30681	0.0234959
ZFAND2B	24.4781	1.7553	0.00232247
HIPK4	24.4551	1.14131	0.045465
PIN4P1	24.4277	1.28857	0.0224865
LINC00665	24.3771	1.43539	0.012733
PLD6	24.3496	1.78789	0.00321261
LOC100289341	24.3439	1.78351	0.00193992
LOC100132352	24.314	1.42403	0.0136497
ASB18	24.2855	1.91739	0.000962808
MFSD2B	24.2726	1.24045	0.0331206
NFYB	24.0617	1.48894	0.00990764
POP5	24.0518	1.76441	0.00220806
LINC00710	24.0472	1.96126	0.000811708
FAM217A	24.0444	1.59496	0.00553749
NRADDP	23.9136	1.18448	0.0481893
PTPRCAP	23.809	1.31499	0.03238
KDM1B	23.7907	1.76483	0.00240104
TNFAIP8L2	23.72	1.35544	0.0174146
SLC16A6	23.5599	1.33354	0.0202866
FAM46B	23.3355	1.76679	0.00242113
GRIK1	23.3339	1.27009	0.0302802
PLBD1	23.2256	2.04599	0.000617915
KCTD18	23.1453	1.43508	0.0144497
HSPB9	23.09	1.26143	0.0273574
CCR6	23.0775	1.12568	0.0479218
EIF2B2	23.0442	1.45571	0.0132859
SPPL3	22.9252	1.77096	0.00247438
PLN	22.925	1.19086	0.0390463
VSNL1	22.9199	1.85898	0.00184978
C1orf111	22.84	1.49113	0.00987326
METTL20	22.8042	1.74688	0.00308552
GPR151	22.721	1.18464	0.0449015
HM13-AS1	22.7115	2.4186	8.90261e-05
RPH3AL	22.6779	1.20197	0.0378129
CTRB1	22.6674	2.4986	4.0178e-05
DNAJC22	22.6367	1.23501	0.0339003
SERPINB1	22.3706	2.25945	0.000220215
ANKRD23	22.2982	1.66131	0.00475785
NFKBIE	22.2598	1.46263	0.0126549
DTYMK	22.2396	1.87616	0.00150088
CSNK1G2-AS1	22.2222	1.30555	0.0309436
C3orf49	22.1825	1.5494	0.00792287
SELO	22.1818	1.14578	0.0470755
ZNF671	21.7965	1.41128	0.0205666
CLDN7	21.6311	1.27477	0.0285976
OGN	21.5247	2.0719	0.00064065
SLC25A29	21.4762	1.48638	0.014322
IDH3A	21.3201	1.19662	0.0404894
STK32B	21.3126	1.29412	0.0308607
ZNF784	21.3051	1.5109	0.0102885
ADAMTS17	21.1077	1.28801	0.0319324
PGP	20.9105	1.60339	0.00920435
ZNF7	20.8356	1.97051	0.00114309
SEBOX	20.6085	1.24413	0.0343361
MAP1LC3B	20.5931	1.37417	0.0200704
SIGLEC15	20.4084	1.5715	0.00907534
KCNRG	20.3611	2.48571	0.000113989
C1orf210	20.2463	1.21778	0.049901
TIGIT	20.2264	1.22218	0.0430179
C7orf55	20.2123	1.23931	0.035683
LOC100130357	20.1891	1.31599	0.0263144
ECM2	20.1435	1.84737	0.00228941
ART1	20.1216	1.43172	0.017325
SMC1B	20.1188	1.33208	0.0308033
PARD6A	20.0748	1.35495	0.0229464
TMPRSS11D	20.0719	2.64374	2.90448e-05
PRR15L	20.0028	1.6736	0.00654409
SGCG	19.7021	2.42285	0.000111432
LOC100506668	19.5735	1.3999	0.0197468
RFTN2	19.5659	1.93937	0.0018669
THRSP	19.5418	1.25639	0.0416581
LOC339666	19.5228	1.27786	0.0341166
KCNQ1	19.5128	1.25611	0.0354122
ZNF431	19.4496	1.32141	0.0296354
THYN1	19.3907	1.94159	0.00223489
LDHAL6A	19.3554	1.75856	0.00379774
GPR182	19.3545	1.32794	0.0266739
LOC100289509	19.2265	1.22906	0.0498585
UBE2G2	19.1922	1.3986	0.0233474
CCT6P3	19.0988	1.47078	0.0196105
PRPS1	18.982	1.42992	0.0187005
GPATCH11	18.9016	1.19255	0.0490522
RUNDC3B	18.7571	1.63771	0.0096757
LINC00163	18.7194	1.59452	0.0093903
IFNA1	18.6826	2.40878	0.000150373
INVS	18.6348	1.4309	0.0192484
UBE2QL1	18.6164	1.5985	0.00867776
PCCB	18.5988	1.40355	0.0234001
MIR374C	18.4431	1.29872	0.0330118
C17orf58	18.434	2.09133	0.00103641
ZFP69	18.241	1.62209	0.00969797
DNAH7	17.9874	1.40766	0.0242567
TAS1R1	17.983	1.59466	0.0100536
C15orf60	17.7836	1.65659	0.00976326
AVPI1	17.7745	1.31665	0.0371427
SLC46A2	17.7122	1.45199	0.0205881
FAM171A2	17.6261	1.40229	0.0309436
USP44	17.5936	1.63421	0.0109904
MMP21	17.5901	1.47149	0.0169235
METTL21C	17.5564	1.6794	0.00863378
C1D	17.4614	1.32818	0.0317836
TM4SF20	17.4371	1.31288	0.0435889
METTL7A	17.3063	1.28321	0.0412189
TMEFF2	17.2976	1.22744	0.045505
COL3A1	17.2706	1.22627	0.0455872
TMEM101	17.2567	1.49895	0.0183488
SPON2	17.1207	1.46728	0.0220728
MIR4265	17.0096	2.57868	7.51009e-05
ASPN	16.9163	2.11668	0.000943554
LOC100130899	16.8744	1.21347	0.0499376
SMLR1	16.8743	1.56577	0.0157059
CDCA3	16.8553	1.64973	0.00821785
C2orf91	16.7701	1.30614	0.0343501
COA5	16.4363	1.51471	0.0167834
FDX1	16.2873	1.91764	0.00297517
SLC35G2	16.1657	1.31526	0.0383071
MYOZ3	16.1198	1.27323	0.0409473
FAM210B	15.9737	1.25757	0.0439354
COMMD5	15.9094	1.82945	0.00408716
CBX2	15.7005	1.26152	0.0490407
PSMB4	15.6008	1.53042	0.015471
LOC100507250	15.5641	1.77829	0.00660013
NAP1L5	15.5358	1.96496	0.00295441
ZNF837	15.5182	1.27707	0.0492365
ABCC5-AS1	15.4939	1.4758	0.0199694
CLDN24	15.4726	1.58076	0.0147657
C10orf129	15.4713	1.26996	0.0472394
FRMD5	15.4442	1.77394	0.00574284
SDS	15.4166	1.56887	0.0143219
MLC1	15.3425	1.57456	0.0149275
TMEM216	15.137	1.74083	0.00797696
LINC00238	15.1216	1.39102	0.0346455
CLDN18	15.0368	1.85611	0.00426853
BBS4	14.9391	1.25202	0.0475738
GMPR	14.9349	1.29635	0.0476094
WNT16	14.9211	1.68445	0.00895456
C11orf42	14.7447	1.80921	0.00570954
LOC100128568	14.624	1.65337	0.0106002
IZUMO4	14.6224	1.86615	0.0052336
FREM3	14.532	1.65	0.0106308
BCAT2	14.4981	1.53527	0.0200585
ZAR1	14.4054	1.39352	0.0302735
GPR34	14.0949	1.50823	0.0222144
NUDT18	14.0892	1.90335	0.00384918
TMEM150C	13.9631	1.95304	0.00291809
FRMPD4	13.8571	1.39326	0.0331705
C2orf69	13.8021	1.86985	0.00461466
CXCR2P1	13.6899	1.43708	0.0266496
TRAFD1	13.5738	1.49939	0.0213355
SMA5	13.5037	1.48728	0.0228784
PDIA2	13.4624	1.62682	0.0138388
PRRG4	13.3957	1.46033	0.0265522
SLA	13.2927	1.47144	0.0241486
LOC143666	13.1857	1.42226	0.0290587
RWDD2A	13.1474	2.0555	0.00233341
PCDHB16	12.9619	2.40789	0.00039478
PCCA-AS1	12.8943	1.37721	0.0432298
POU5F1P4	12.8831	1.49484	0.0291639
LOC100128505	12.7754	1.9391	0.00431914
APOL5	12.7432	1.54283	0.0205693
OSBPL10-AS1	12.6638	2.36734	0.000509802
LECT1	12.6634	1.95638	0.00347515
CSRP2	12.5965	1.35763	0.0382479
OMD	12.5202	1.99585	0.00321138
HEBP1	12.4978	1.60749	0.0175253
KLHL10	12.4278	1.65673	0.0130606
ACTL7A	12.3615	1.79911	0.00729666
C3AR1	12.347	2.17115	0.00127033
DTNBP1	12.3013	1.93559	0.00380048
HAVCR2	12.2504	1.31693	0.0450931
BHLHA15	12.1157	1.60167	0.0158966
FRMD6-AS2	11.6477	1.43443	0.0321681
SMIM18	11.6022	2.47548	0.000339044
RRAGA	11.5586	1.53341	0.0216018
DIO1	11.5577	1.40723	0.0389728
C6orf226	11.5232	1.7098	0.0111566
ATP5G1	11.5122	1.71208	0.0109566
OR2H2	11.3196	2.03715	0.00275629
INSM2	11.2922	1.61448	0.0171962
C1orf145	11.219	1.66961	0.0145648
AIM2	11.1447	2.73479	9.17522e-05
DDI1	11.1439	1.77629	0.00876353
UFSP1	11.0622	2.2565	0.00103114
DBP	10.9129	1.68599	0.0131367
LYSMD4	10.8131	2.18356	0.00159035
RPL13AP6	10.7592	1.4398	0.0343853
OR1L6	10.692	1.5189	0.0263203
RDH5	10.6511	2.1974	0.00144586
LOC388906	10.6054	1.93002	0.00486918
MED9	10.5736	1.76603	0.0101406
OR2D3	10.3502	1.93519	0.00498537
LIPH	10.2984	1.77745	0.010136
RHOBTB1	10.2749	1.44643	0.0353435
CDKN3	10.2204	2.70819	0.000106924
