# Supplementary material for: Binding of nuclear factor κB to noncanonical consensus sites reveals its multimodal role during the early inflammatory response
Source: HighWire-hosted journal article supplement (doi:10.1101/gr.210005.116), 2016-09-15
Supplement: Supplemental_Table_S3.xlsx [file Supplemental_Table_S3.xlsx]

## Sheet: 0_vs_30_min_7SKi_downegulated
gene name	baseMean	log2FoldChange	pvalue
THY1	11.7278	-1.02208	0.0127139
DACT1	14.962	-1.00244	0.012546
LINC00672	13.2101	-1.03348	0.0112073
HIST2H2BC	13.939	-1.02806	0.0111052
CAPNS2	15.733	-1.02791	0.0109777
GNG2	14.0578	-1.03	0.0109127
TAS1R3	13.3193	-1.03907	0.0105735
BZRAP1-AS1	14.9435	-1.05248	0.00942246
TPD52L1	12.4246	-1.06618	0.00927782
ALK	16.0095	-1.04491	0.00921947
TUBA4A	13.504	-1.06287	0.00900049
ACSM5	13.7083	-1.06492	0.00889332
EPHA1-AS1	18.083	-1.02361	0.00878453
RAG2	12.2631	-1.07294	0.00876727
ZNF385C	10.3553	-1.09991	0.00771724
LOC100499194	15.308	-1.07454	0.00748776
NRG4	13.9829	-1.089	0.00726638
CEP170P1	14.6451	-1.09542	0.00696458
PPIL6	17.363	-1.08479	0.00634968
NECAB1	10.8713	-1.12768	0.00628389
ST8SIA2	11.8983	-1.12328	0.00621401
C3orf70	10.5578	-1.12989	0.00619311
AKR1C1	24.0848	-1.03089	0.00594511
ZNF252P-AS1	11.9935	-1.13454	0.00572053
LOC151009	14.347	-1.12265	0.0055538
SNTG1	22.4448	-1.04127	0.00548204
EFCAB5	23.7464	-1.03503	0.00544358
LOC100270804	22.6007	-1.04561	0.00537198
DDI1	21.829	-1.05342	0.00532552
FLJ45513	24.9213	-1.02341	0.0052125
ARHGEF33	14.873	-1.12656	0.00510578
FAM156A	26.4757	-1.02148	0.00496178
IKZF2	27.0334	-1.01277	0.00485505
FAM184A	10.014	-1.16521	0.00477558
BDNF-AS	24.1123	-1.05069	0.00448972
LOC100507053	15.0481	-1.1474	0.00434352
SLC7A14	16.7209	-1.15028	0.00420611
SLCO2A1	13.7408	-1.16313	0.00417472
SH3GL1P2	21.5513	-1.09771	0.0041206
MAB21L2	29.7335	-1.01179	0.00398838
ARHGAP11B	29.6379	-1.02027	0.00395233
C1orf114	13.9063	-1.17181	0.00393624
ZBTB20-AS1	30.3961	-1.0128	0.00363275
LOC100507244	16.4656	-1.16833	0.00355703
SNORD114-14	30.3522	-1.04896	0.00351674
LOC285758	10.3878	-1.20558	0.00349838
FAM134B	12.5287	-1.19543	0.00348402
ANKRD30BP3	28.2077	-1.04383	0.0034398
DUSP5P1	31.1014	-1.01264	0.00343647
CSMD3	13.4092	-1.20075	0.0032438
SLC15A2	16.994	-1.17113	0.00319338
ALG1L9P	16.1328	-1.17787	0.00313072
CYP3A5	30.8183	-1.03069	0.00311165
LOC728613	22.9323	-1.12452	0.0030588
LOC100506134	19.1311	-1.15822	0.00290419
IQUB	22.1802	-1.12983	0.00288565
SEMA3E	24.9082	-1.10482	0.00263874
BCDIN3D-AS1	24.2356	-1.12046	0.00262901
SHISA2	29.9608	-1.05829	0.00256649
TMPO-AS1	18.0321	-1.1866	0.00254792
ACSM1	24.4386	-1.1185	0.00254213
ABHD1	15.4407	-1.22122	0.00249132
ZBTB32	21.9689	-1.16482	0.00244185
ENO4	19.2966	-1.17745	0.00239781
TTC18	35.7472	-1.04341	0.00211254
CBLN2	16.7576	-1.22873	0.00201904
SRL	14.7411	-1.25205	0.00192329
RCSD1	11.7332	-1.27716	0.00190141
NEURL1B	19.5572	-1.20493	0.00184183
LINC00639	33.4554	-1.07859	0.0017424
LOC284260	28.4086	-1.12308	0.00173667
KISS1	19.6135	-1.21674	0.00170781
MIR29C	18.5823	-1.24241	0.00161988
AADAC	10.8717	-1.30486	0.0015791
MIR503	17.7996	-1.24896	0.001551
PSMC3IP	31.5476	-1.10381	0.00147114
TEX9	35.6665	-1.07911	0.00142316
FAM150B	17.2929	-1.26736	0.00140189
TNK1	38.7842	-1.04587	0.00139353
SIX1	11.8863	-1.32235	0.00133779
LINC00324	30.9896	-1.1338	0.00130079
RPSAP52	13.7041	-1.31342	0.0012517
CCNI2	15.0111	-1.30957	0.00124418
SCML2	25.4057	-1.18427	0.00123773
TSGA10	41.8238	-1.03772	0.00116698
MIR4712	15.4746	-1.31613	0.00113757
CCDC168	13.211	-1.33404	0.00113295
CPXM2	17.1892	-1.29814	0.00113079
SLC24A5	24.1605	-1.20752	0.00112314
LINC00622	36.8609	-1.0816	0.00111303
PDE3B	11.5204	-1.34306	0.00110769
EDNRA	12.4436	-1.34384	0.00106877
MMP7	29.6684	-1.15924	0.00105678
TRAM1L1	22.6129	-1.24314	0.00102961
MIR3685	17.2473	-1.31068	0.000984888
LOC100288974	39.2211	-1.0917	0.00098275
SSTR5	10.9377	-1.36472	0.000944743
HSD3BP4	29.5065	-1.17565	0.000939994
STAT4	17.6391	-1.30805	0.000928536
SHROOM3	17.0429	-1.31858	0.000885758
SNORD114-6	24.5342	-1.23206	0.000878017
FAM72A	41.0427	-1.10287	0.000875173
MIR7-1	36.9129	-1.10532	0.00086
DENND2D	30.2935	-1.17339	0.000836845
LOC389791	27.9964	-1.20044	0.000818922
AMOT	29.8474	-1.18413	0.000792054
ZNF682	23.2316	-1.28687	0.000788777
LOC653160	36.2208	-1.13131	0.000785585
CLDN20	39.7596	-1.08665	0.000780519
SFMBT2	10.2751	-1.38942	0.000768738
SETBP1	21.4379	-1.28412	0.000755742
PRKXP1	46.9245	-1.03183	0.000754998
SNORD113-3	31.1176	-1.17331	0.000751001
KIAA0895	49.3011	-1.03408	0.0007302
KIAA1875	19.3922	-1.31355	0.000724757
GPM6B	33.6701	-1.15067	0.000722927
SYT16	34.9577	-1.15147	0.000682029
NDN	39.8641	-1.11021	0.000663523
LOC100507433	47.126	-1.07445	0.000653009
CAMK4	19.0413	-1.33807	0.000620191
RNPC3	53.4333	-1.06224	0.00061734
PSG4	43.9988	-1.08246	0.000575849
ARHGAP25	26.4955	-1.25265	0.000573943
KBTBD11	27.4279	-1.2671	0.00056763
SLC26A7	10.6353	-1.42772	0.000544549
MBL1P	35.8578	-1.15573	0.000541308
AUNIP	40.7252	-1.11526	0.000536303
MFAP4	14.8175	-1.40378	0.000526468
CTAGE7P	23.5119	-1.32763	0.000414006
DAAM2	14.3632	-1.44639	0.000371797
CCDC3	23.9206	-1.33952	0.000351821
CLEC4GP1	28.9493	-1.28674	0.000333771
COL10A1	44.1727	-1.13868	0.000330181
SNORD44	37.2831	-1.19058	0.0003216
HSP90B2P	22.547	-1.36585	0.000317296
ADCY10P1	42.1164	-1.46366	0.000316889
LOC643529	13.8565	-1.47554	0.000299395
CBWD6	55.6247	-1.04946	0.000298516
LOC100128398	20.1643	-1.40951	0.000292216
CAMK1D	42.5732	-1.1509	0.000276505
TRERF1	57.981	-1.03668	0.000264629
SNORD45B	49.6619	-1.10352	0.000262226
VASH2	40.4761	-1.18116	0.000259105
RCAN2	12.189	-1.51005	0.000240528
PKMYT1	29.1821	-1.32229	0.000236614
LOC644961	49.046	-1.11376	0.000235661
DNALI1	48.1224	-1.11948	0.000235608
FAM74A3	26.2213	-1.34446	0.000233394
SNORD78	31.624	-1.28662	0.000232497
ZMAT1	144.36	-1.16917	0.000205859
C7orf13	41.9427	-1.1977	0.000202465
ARHGEF25	36.1993	-1.29235	0.000201123
HERC2P7	37.0464	-1.23958	0.000198963
LOC100505648	49.2301	-1.17133	0.000198168
DOK3	39.7286	-1.22324	0.000195759
TYRP1	47.4813	-1.16538	0.000193264
DNAH11	50.8602	-1.14297	0.00019186
ASB14	23.7544	-1.39639	0.000191497
ARHGEF26-AS1	46.8919	-1.15941	0.000189983
ZNF135	22.3712	-1.41737	0.000188382
LMO3	10.8678	-1.54281	0.000187607
LOC100128252	26.384	-1.37903	0.000182605
RBM12B-AS1	50.0405	-1.14047	0.000181469
LOC100506124	38.4021	-1.23264	0.000174602
PRKCZ	12.0093	-1.55173	0.000167273
USP6	21.8313	-1.4391	0.000166324
ADAL	42.2131	-1.21681	0.000159247
C1orf110	31.5025	-1.3202	0.000154497
TAPT1-AS1	41.584	-1.20903	0.000153124
LOC100272228	64.5445	-1.04273	0.000146517
C10orf11	13.6201	-1.55766	0.000139117
PBX1	55.8233	-1.1146	0.00013287
LOC100130557	49.806	-1.1608	0.000129626
GHR	24.3089	-1.43224	0.000127557
ANGPTL1	57.8459	-1.10428	0.000107328
AMT	73.0655	-1.03877	0.000103935
TLR2	12.1513	-1.60756	9.45407e-05
FAM72B	42.7552	-1.25973	9.33135e-05
LRRC66	22.6565	-1.48393	9.28393e-05
RBM26-AS1	41.1805	-1.29872	8.92659e-05
SNORD29	19.6059	-1.53062	8.81715e-05
MT1F	20.5584	-1.5232	8.34423e-05
SNORD110	18.3275	-1.56478	8.13392e-05
HRNR	16.6893	-1.58271	8.08413e-05
ZIK1	42.7926	-1.2543	7.80767e-05
GNRH1	71.3652	-1.10022	7.75363e-05
ZNF32-AS2	10.593	-1.6327	7.72345e-05
LOC100527964	45.9741	-1.24068	7.65407e-05
LYPD6	16.67	-1.5839	7.60737e-05
KCNIP4	72.439	-1.03522	7.55613e-05
MEGF10	69.357	-1.07255	7.2454e-05
TAS2R31	56.3544	-1.14649	6.55963e-05
C1orf101	65.8482	-1.08191	6.4808e-05
FAM50B	80.6093	-1.0019	6.4582e-05
ZNF681	20.9046	-1.5498	6.11833e-05
STAC	78.8508	-1.02806	6.06051e-05
AFF3	37.4084	-1.33519	5.84216e-05
SCARNA15	17.0495	-1.60844	5.77417e-05
ZFP2	17.0438	-1.61203	5.56852e-05
GPLD1	23.926	-1.51632	5.48142e-05
LOC100499484	21.0893	-1.56659	5.24168e-05
USP32P1	17.8443	-1.60646	5.20412e-05
CRHBP	21.1033	-1.56234	5.13209e-05
BTN2A3P	85.4663	-1.00526	4.85817e-05
ZNF423	18.7636	-1.60104	4.79513e-05
C12orf69	20.3922	-1.58067	4.78318e-05
C7orf63	69.3724	-1.07991	4.72503e-05
TSHZ3	68.4224	-1.1763	4.46556e-05
RNF212	11.058	-1.69062	4.24959e-05
SRRM5	15.5475	-1.65765	4.17673e-05
MCMDC2	35.2721	-1.40626	3.92083e-05
ZCCHC18	85.9841	-1.01081	3.45861e-05
NKAPL	41.4386	-1.33853	3.30173e-05
TMEM56-RWDD3	26.9757	-1.54349	3.2997e-05
ARRDC4	26.5295	-1.55145	3.26863e-05
CCDC170	64.4041	-1.14955	3.08517e-05
CLEC2D	77.7641	-1.06128	2.964e-05
CADM3	42.3472	-1.37217	2.93216e-05
MBNL3	65.7577	-1.17891	2.86562e-05
CPVL	19.0803	-1.66101	2.85336e-05
C9orf47	27.455	-1.53977	2.69058e-05
ABCB4	13.2838	-1.72583	2.59925e-05
WNK4	32.5071	-1.46179	2.56988e-05
SMAD5-AS1	44.7472	-1.37507	2.47575e-05
IL10RA	13.455	-1.73102	2.46111e-05
SERTAD4-AS1	54.1151	-1.24037	2.45341e-05
LOC100379224	25.6976	-1.57235	2.35551e-05
NKAIN2	11.4413	-1.74792	2.29991e-05
TTC3P1	22.0219	-1.62627	2.27174e-05
LOC100289230	86.0351	-1.04814	2.15074e-05
SGSM1	63.9552	-1.17173	2.12494e-05
ZNF582-AS1	18.8211	-1.68168	2.09257e-05
HOXB-AS3	49.3287	-1.30725	1.99351e-05
SLAIN1	58.7183	-1.23188	1.99068e-05
PLEKHA6	79.9279	-1.08014	1.66643e-05
TAF4B	58.4809	-1.23637	1.66227e-05
MNS1	33.4026	-1.49193	1.62289e-05
ZNF665	36.0171	-1.4592	1.52367e-05
PDE6B	15.5593	-1.76916	1.50655e-05
IL12A	35.2797	-1.49262	1.44608e-05
ANKRD18B	89.5224	-1.04886	1.27593e-05
ZNF547	93.6854	-1.04594	1.21569e-05
C5orf63	67.4966	-1.22708	1.18353e-05
LOC646471	60.9353	-1.23466	1.15527e-05
PNPLA4	81.3921	-1.09619	1.10362e-05
MIR126	82.4722	-1.11378	1.06776e-05
LOC100506321	21.3779	-1.71805	1.01307e-05
LOC100288198	54.2671	-1.30604	9.22287e-06
RNLS	34.7187	-1.52257	9.16275e-06
NEK10	101.165	-1.05009	8.7677e-06
E2F2	12.2801	-1.83871	8.24055e-06
MFSD7	41.1998	-1.51538	7.61006e-06
RAB9B	17.2154	-1.79547	7.52673e-06
ZNF286B	92.0791	-1.07405	7.50959e-06
RPL23AP64	45.4685	-1.43001	7.49533e-06
ZNF93	99.7925	-1.03519	6.82423e-06
GP6	62.7251	-1.25332	6.5367e-06
HSD17B2	53.3971	-1.34252	6.37992e-06
ZNF69	21.1144	-1.75994	6.23382e-06
PPARG	75.8358	-1.21354	6.09761e-06
ADPRH	97.4964	-1.0521	5.89216e-06
CMKLR1	52.6712	-1.41655	5.49437e-06
ZNF793	49.2011	-1.41827	4.77386e-06
ZFP57	39.0029	-1.53684	4.55555e-06
PA2G4P4	19.815	-1.81468	4.51516e-06
TAF1A	113.539	-1.01496	4.48976e-06
MIRLET7DHG	116.569	-1.05743	4.33541e-06
HERC2P3	114.87	-1.001	4.24039e-06
CHRNE	61.8869	-1.32445	4.09765e-06
LDLRAD4	84.9893	-1.23945	4.07724e-06
ZNF563	20.5592	-1.80206	4.0714e-06
ZNF763	17.8458	-1.84527	3.8791e-06
MEG9	51.1769	-1.39135	3.70109e-06
MIR181A2HG	35.8142	-1.57554	3.48374e-06
TYMP	72.2111	-1.22274	3.40517e-06
CHRNG	37.0425	-1.5928	3.30518e-06
ZNF257	35.9797	-1.58424	3.01061e-06
CRYGS	36.2871	-1.59851	2.78442e-06
MEIS3P1	38.6075	-1.57208	2.5577e-06
NDUFAF4P1	19.1485	-1.86506	2.45556e-06
ZNF717	80.4976	-1.19541	2.33048e-06
PPP1R9A	113.369	-1.0482	2.32585e-06
PRDM5	62.4851	-1.31591	2.32013e-06
IL33	100.07	-1.08981	2.26938e-06
CSRP2	63.6941	-1.33006	2.09002e-06
ZNF578	106.222	-1.06387	2.01561e-06
SLC25A27	42.7305	-1.5594	1.9936e-06
ST8SIA6	76.0787	-1.27394	1.98227e-06
ACN9	37.7945	-1.60259	1.96656e-06
HENMT1	97.1478	-1.11932	1.81649e-06
ZNF572	64.0004	-1.32811	1.69812e-06
PLEKHG7	37.4572	-1.62841	1.64847e-06
HIF1A-AS2	22.3697	-1.85508	1.52078e-06
DTX4	73.1871	-1.26942	1.47752e-06
RPL36A	88.9517	-1.16537	1.40639e-06
KLB	36.545	-1.64584	1.40368e-06
LOC283070	32.8164	-1.70317	1.34659e-06
RASGRP1	44.8411	-1.5315	1.29902e-06
COL6A5	26.8029	-1.79678	1.28025e-06
NPHP3-ACAD11	78.9782	-1.2372	1.23706e-06
ZNF491	30.2989	-1.75739	1.21133e-06
COX10-AS1	85.4282	-1.19392	1.19345e-06
XKR9	116.472	-1.06131	1.01638e-06
SSPN	44.7081	-1.55779	9.84703e-07
FAM69A	103.782	-1.11424	9.36574e-07
ADRB1	20.2715	-1.93783	8.51577e-07
ORC1	115.701	-1.0993	8.30591e-07
ZNF433	29.4167	-1.78611	8.11853e-07
PGM5P2	132.455	-1.0015	7.88994e-07
RAB3C	85.9549	-1.218	6.71716e-07
CDC25C	95.4912	-1.17223	6.47989e-07
ZNF442	16.0854	-2.03601	6.08675e-07
ZNF485	34.1138	-1.78829	5.35239e-07
ABCA10	121.181	-1.10457	5.10101e-07
TMEM194B	93.8289	-1.23786	4.80395e-07
ISPD	91.0471	-1.21327	4.72721e-07
P2RX7	108.498	-1.21264	4.65122e-07
LACC1	344.213	-1.31989	4.24652e-07
FMN1	104.148	-1.14568	4.10877e-07
SPESP1	12.0362	-2.0936	3.90382e-07
LINC00278	29.9858	-1.85805	3.84372e-07
BLID	40.1206	-1.67651	3.78024e-07
PION	108.899	-1.1266	3.7454e-07
CAP2	26.4238	-1.90346	3.45597e-07
ZNF814	145.465	-1.04472	3.45128e-07
MST1	61.7657	-1.45777	3.38278e-07
ZNF483	71.7695	-1.39398	3.27779e-07
CFB	32.8129	-1.8018	3.20801e-07
MBNL1-AS1	78.4794	-1.31964	3.20369e-07
PLXNC1	25.8661	-1.93075	3.20316e-07
RTL1	116.859	-1.12386	2.96547e-07
AGAP6	146.503	-1.00933	2.87367e-07
CLGN	25.2446	-1.96136	2.74645e-07
MS4A2	11.4	-2.12379	2.69436e-07
ZNF214	53.5717	-1.56107	2.68198e-07
ZKSCAN7	83.0003	-1.29445	2.33818e-07
SPEF2	26.8072	-1.92933	2.31617e-07
TUSC3	79.0873	-1.36368	1.67442e-07
ADAM22	135.366	-1.07034	1.48302e-07
MAN1C1	62.7189	-1.49305	1.33753e-07
SOX5	23.3468	-2.06026	1.02524e-07
LRRIQ1	57.1173	-1.55656	9.39214e-08
ZRANB2-AS1	46.7558	-1.69751	8.18707e-08
ALDH5A1	49.8011	-1.65047	7.70327e-08
AMY2B	34.494	-1.90394	6.99265e-08
ZFP82	137.199	-1.0894	6.15993e-08
ZNF781	25.7906	-2.06271	6.12589e-08
MEG8	64.0505	-1.51897	5.78523e-08
ZNF767	143.468	-1.0791	5.51139e-08
ZNF883	20.125	-2.18293	4.53693e-08
SFMBT1	120.231	-1.18718	4.14162e-08
FLJ13197	38.8445	-1.88293	3.99683e-08
DIRAS3	141.636	-1.09089	3.95936e-08
ZDHHC23	108.138	-1.23888	3.9123e-08
IMPG1	61.8343	-1.56753	3.8385e-08
ZNF567	183.033	-1.00232	3.64207e-08
ZNF471	123.733	-1.84729	3.55704e-08
APLF	150.511	-1.07756	3.47478e-08
ASF1B	130.661	-1.18001	2.49308e-08
ZNF273	160.723	-1.04563	2.4622e-08
C1orf213	67.2147	-1.54812	2.40801e-08
GOLGA8S	137.886	-1.11734	2.3782e-08
ZNF395	158.048	-1.05238	2.28219e-08
MAFB	176.638	-1.02111	2.22765e-08
ZNF501	132.862	-1.13958	2.18117e-08
MGC21881	126.233	-1.19274	2.16359e-08
CCDC150	82.9516	-1.42275	1.75087e-08
CXCL11	86.1243	-1.39338	1.70781e-08
OIP5	105.085	-1.28089	1.65111e-08
DNM3	79.6094	-1.50009	1.42874e-08
PTGR2	78.9593	-1.45776	1.41432e-08
ZSCAN23	37.3295	-1.99499	1.30556e-08
LOC90246	58.8751	-1.66169	1.26383e-08
LRRC2	29.8351	-2.09725	1.07177e-08
WASH5P	117.846	-1.25136	1.05114e-08
MASP1	29.5991	-2.11856	1.01303e-08
ZNF670	172.488	-1.0743	9.99485e-09
POLE2	148.299	-1.13962	8.62204e-09
RGPD8	74.4249	-1.54066	8.54452e-09
ZNF571	93.5211	-1.38163	7.87104e-09
LOC100131234	107.617	-1.32384	7.43197e-09
P2RY1	46.4642	-1.84699	6.50762e-09
CLDN1	55.3712	-1.73531	6.47713e-09
LOC729987	83.4886	-1.48674	5.56062e-09
CDCA8	109.449	-1.31541	5.2837e-09
PCDH18	37.7348	-2.01245	5.00721e-09
NAP1L2	65.4545	-1.64251	4.88438e-09
GOLGA8T	129.63	-1.21546	4.84505e-09
TICRR	82.7172	-1.48435	4.83565e-09
SLC30A3	42.6747	-1.93944	4.0774e-09
ZNF285	100.1	-1.36585	4.06835e-09
ZNF577	96.6991	-1.40277	3.54537e-09
ZFP28	114.845	-1.31517	3.52404e-09
AURKB	199.639	-1.06353	3.47759e-09
BACH2	179.713	-1.05776	3.03492e-09
LPL	64.5189	-1.71289	2.68504e-09
PITPNM3	62.3376	-1.73311	2.49931e-09
GALNT3	23.6365	-2.3324	2.18909e-09
ZNF345	164.523	-1.12723	2.12899e-09
AKD1	174.955	-1.08064	2.12305e-09
PYGO1	103.756	-1.36908	2.10648e-09
SNAI2	72.0387	-1.6115	2.07977e-09
LRRN3	34.36	-2.1283	2.02809e-09
ZNF10	137.524	-1.22019	1.93118e-09
ZNF235	170.708	-1.11929	1.83622e-09
PIP4K2C	187.61	-1.05143	1.6533e-09
C5orf54	203.755	-1.01337	1.5893e-09
INADL	95.7249	-1.44333	1.50301e-09
CCT6P1	122.977	-1.29542	1.3143e-09
GFPT2	138.874	-1.21877	1.28356e-09
ZNF573	166.553	-1.13573	1.25917e-09
ZNF649	211.842	-1.02025	1.16166e-09
MAP9	27.5719	-2.31807	8.72783e-10
SDHAP3	112.041	-1.46827	8.34709e-10
KIF18B	56.0089	-1.84411	7.15707e-10
MIR186	42.2694	-2.05872	5.6326e-10
VWDE	36.5621	-2.1688	5.33354e-10
DNAH5	84.4749	-1.56393	4.89565e-10
ZNF493	180.88	-1.1311	4.77931e-10
GABPB1-AS1	187.029	-1.09177	4.30336e-10
MTBP	193.861	-1.07532	3.84425e-10
LOC100131564	171.396	-1.15891	3.74073e-10
ZNF595	143.026	-1.26312	2.88059e-10
ZNF525	71.7917	-1.72469	2.75948e-10
TMEM200C	25.4794	-2.4435	2.55004e-10
ZNF844	39.9872	-2.15957	2.5209e-10
LINC00654	139.57	-1.28512	2.51386e-10
XRCC2	84.7364	-1.59908	2.50888e-10
HIST1H2AL	188.186	-1.11356	2.31221e-10
ZNF44	197.78	-1.08623	2.30139e-10
SP8	18.1089	-2.58833	2.23779e-10
CCDC18	196.476	-1.0892	2.11562e-10
ZNF418	80.4969	-1.63897	1.94496e-10
ZNF829	94.1736	-1.58136	1.83644e-10
MASP2	55.4791	-1.92875	1.72583e-10
DEPDC1B	138.942	-1.29789	1.54405e-10
GALNT15	88.2685	-1.58431	1.48947e-10
PSMD6-AS2	79.6458	-1.68442	1.45142e-10
GVINP1	110.105	-1.46582	1.26166e-10
MYO15B	62.0091	-1.85987	1.24595e-10
LUST	263.026	-1.59629	1.1128e-10
SORBS1	188.824	-1.1318	1.10825e-10
PCDHA11	33.1067	-2.36053	1.03554e-10
CCT6P3	198.883	-1.10057	1.02565e-10
SLC16A6	170.588	-1.21132	9.20156e-11
TUBB1	59.5315	-1.94354	8.13401e-11
CENPA	117.933	-1.46082	8.02323e-11
ADAT2	207.881	-1.08944	6.98642e-11
PTGFR	169.951	-1.2011	6.42155e-11
ZNF816	216.974	-1.14532	5.33724e-11
GRAMD3	77.7997	-1.72889	5.00001e-11
KIAA1407	143.875	-1.31289	4.4863e-11
STARD13-AS	72.8585	-1.83001	4.26935e-11
SHISA3	79.4243	-1.7193	4.23192e-11
MREG	116.731	-1.44531	3.81432e-11
ATF7IP2	82.3114	-1.71169	3.60894e-11
SGOL1	54.9632	-2.01485	3.32099e-11
HOXD1	193.709	-1.15229	3.23475e-11
ZNF718	130.6	-1.37989	3.20296e-11
DAW1	202.557	-1.15355	3.12266e-11
ZBTB46	195.138	-1.14272	3.02526e-11
ZNF180	267.374	-1.00881	2.91425e-11
LINC00665	49.8667	-2.11563	2.83373e-11
N4BP2L2-IT2	166.898	-1.24932	2.82626e-11
ZNF582	64.6329	-1.90801	2.77489e-11
PCDHB13	136.312	-1.35614	2.76794e-11
ZNF570	239.099	-1.05466	2.49178e-11
XYLT1	41.1922	-2.29409	2.10218e-11
ZNF404	105.502	-1.5398	2.08799e-11
RNF180	37.913	-2.34191	2.07427e-11
MIR217	18.4409	-2.74147	2.04018e-11
TMEM14E	208.216	-1.12699	1.87712e-11
INPP4B	149.258	-1.3125	1.81358e-11
ZNF215	129.663	-1.40498	1.70888e-11
ZNF568	238.395	-1.06709	1.69275e-11
GPX7	260.556	-1.07648	1.59767e-11
KBTBD8	154.646	-1.33602	1.57378e-11
POLG2	208.222	-1.14818	1.41789e-11
BORA	241.424	-1.08638	1.3653e-11
SNCAIP	84.3276	-1.73589	1.26199e-11
ESPL1	173.12	-1.29425	1.11303e-11
LINC00176	162.738	-1.28803	1.10316e-11
ZFP37	67.5583	-1.95496	8.37112e-12
LAMP3	205.499	-1.15781	8.28922e-12
GLIS3	83.6176	-1.76225	8.18984e-12
ZNF615	198.188	-1.21507	7.33855e-12
ZNF223	189.273	-1.1971	7.17116e-12
FLJ34503	44.4345	-2.3106	6.02361e-12
ZNF549	198.044	-1.18773	4.29211e-12
DKFZP434I0714	93.4505	-1.72563	3.66993e-12
USP44	46.625	-2.29619	2.8038e-12
E2F8	90.1366	-1.78552	2.74175e-12
LIN9	241.22	-1.08903	2.69324e-12
SERTAD4	47.8001	-2.33666	2.6268e-12
PTGIS	171.904	-1.29674	2.56974e-12
EYA1	20.0328	-2.85225	2.51035e-12
TIGD2	109.023	-1.59218	2.50819e-12
MTERF	284.225	-1.01201	2.15376e-12
SPIN3	236.509	-1.13437	1.98875e-12
SLC39A8	108.38	-1.6002	1.98556e-12
ZNF700	277.821	-1.0373	1.86136e-12
NEIL1	103.003	-1.69476	1.79181e-12
SPAG16	90.0353	-1.79507	1.70143e-12
HIST1H2BB	284.76	-1.01557	1.6698e-12
LRP1B	48.3731	-2.31346	1.42714e-12
TNR	188.552	-1.25867	1.26796e-12
SLC7A11-AS1	237.564	-1.16586	9.39056e-13
KIAA0825	253.807	-1.09209	7.97951e-13
IQGAP2	158.879	-1.36534	7.68503e-13
FAM169A	65.6338	-2.12582	5.63088e-13
NRK	67.7409	-2.09175	5.46269e-13
ZNF658	152.303	-1.43487	3.80872e-13
DOK5	162.791	-1.3848	3.80863e-13
CCDC41	235.306	-1.17695	3.57314e-13
CDC25A	300.753	-1.02161	3.35153e-13
IGIP	231.259	-1.1994	3.23469e-13
GMNC	23.3068	-2.92817	3.09837e-13
CCDC66	276.775	-1.07222	3.01065e-13
PLCB4	53.9235	-2.28078	2.68833e-13
HIST1H2AJ	160.014	-1.39598	2.36581e-13
ZNF107	290.568	-1.07888	2.22289e-13
CCDC15	136.174	-1.5615	1.97577e-13
KCNT2	54.492	-2.2918	1.82141e-13
PKP2	100.293	-1.78086	1.5965e-13
CDCA3	176.29	-1.35091	1.52174e-13
FSD1L	246.612	-1.16066	1.42303e-13
XPA	295.585	-1.07285	1.05266e-13
SATB1	304.921	-1.03741	1.03132e-13
ZNF382	125.136	-1.59798	1.03122e-13
ETV1	280.481	-1.09776	1.01519e-13
ZNF136	266.81	-1.17315	9.24052e-14
RFC3	237.695	-1.18061	8.9612e-14
KLRAP1	101.953	-1.78212	7.77876e-14
ZNF721	295.502	-1.12112	7.72641e-14
KIF27	203.603	-1.26798	7.71639e-14
GTSE1	184.503	-1.36152	7.26446e-14
CCSER1	38.1998	-2.71725	6.17516e-14
PM20D2	144.845	-1.50893	5.9988e-14
ZNF431	314.618	-1.03638	5.66401e-14
ZNF100	306.252	-1.05399	5.64696e-14
ZNF283	204.913	-1.28375	5.5349e-14
SAMD12	75.0487	-2.06455	5.17561e-14
IFT74	301.09	-1.06471	5.01501e-14
CDKN3	239.243	-1.19223	4.95812e-14
NAALADL2	53.2946	-2.38453	4.34447e-14
COL21A1	65.0587	-2.2357	3.2626e-14
WHAMMP3	249.994	-1.17332	3.01143e-14
ZNF37BP	298.238	-1.0757	2.51236e-14
ZNF154	84.5434	-1.975	2.41747e-14
CDCA7	186.193	-1.35563	2.41494e-14
PDIK1L	348.519	-1.01039	2.12271e-14
KGFLP2	36.4664	-2.80682	1.69377e-14
MEGF11	83.9094	-2.00444	1.62954e-14
ZNF709	127.54	-1.65592	1.47242e-14
DCLK1	58.4278	-2.42875	1.43999e-14
ZNF300P1	25.9361	-3.07061	1.27196e-14
RFTN2	265.069	-1.16479	1.10125e-14
MAP10	141.879	-1.56931	8.65637e-15
ZNF502	189.722	-1.4134	8.63765e-15
SEMA3A	60.1003	-2.3676	7.05735e-15
CXXC5	61.5883	-2.34126	5.37399e-15
SBDSP1	330.083	-1.06527	5.32792e-15
ZNF197	322.229	-1.0841	3.45995e-15
KIFC1	158.428	-1.54742	3.38848e-15
ZNF141	80.2284	-2.147	3.16117e-15
CENPI	367.544	-1.02165	2.04988e-15
CYP27C1	52.9677	-2.59027	1.87003e-15
TUBD1	226.944	-1.2888	1.69328e-15
ZSCAN12	239.638	-1.25361	1.5523e-15
ZNF14	137.408	-1.69736	1.54653e-15
REEP1	108.754	-1.8698	1.50423e-15
LEPREL1	163.483	-1.5215	1.46877e-15
PAPPA	233.78	-1.27375	1.4395e-15
VIP	37.7132	-2.92881	1.23301e-15
CD36	118.184	-1.822	1.10595e-15
ZNF326	292.85	-1.17582	1.04351e-15
PTPN13	48.4001	-2.70289	1.01132e-15
HIST1H2BM	94.4322	-2.05216	9.45955e-16
SASS6	143.099	-1.6613	9.02186e-16
UBE2C	257.132	-1.2574	7.64801e-16
ZNF583	206.703	-1.38248	7.53329e-16
NNAT	76.9962	-2.19971	6.96908e-16
GLRB	167.707	-1.52535	4.93968e-16
LY75	314.25	-1.125	4.85849e-16
ZNF714	343.389	-1.08156	4.05734e-16
GOLGA8B	76.332	-2.28191	3.77741e-16
LOC344887	111.207	-1.92428	3.18749e-16
ZNF610	132.392	-1.72667	3.15373e-16
PIGA	363.892	-1.05067	2.96758e-16
CKAP2	1194.17	-1.01628	2.36709e-16
ITGA1	145.394	-1.72858	2.05335e-16
FAM20A	80.1464	-2.21316	1.8439e-16
EMP2	76.2578	-2.28879	1.32791e-16
GPR155	232.498	-1.34541	1.17237e-16
ZFP3	76.9959	-2.2838	1.15879e-16
RNF219	442.968	-1.05189	1.05522e-16
RPS6KA6	77.5936	-2.28629	9.84548e-17
CDC7	321.197	-1.15176	9.42069e-17
CYP1A1	245.721	-1.35004	8.87951e-17
ZNF420	194.658	-1.49327	6.76762e-17
SPC25	304.564	-1.18632	5.75788e-17
ZNF624	331.96	-1.14498	4.92402e-17
FBXO5	179.004	-1.60102	3.91768e-17
ERVK13-1	246.123	-1.33206	3.55072e-17
ZNF614	428.193	-1.01104	3.17845e-17
ZNF546	153.139	-1.66678	3.03087e-17
PCDHGA4	100.162	-2.05623	2.75561e-17
PAPLN	272.92	-1.26254	2.39341e-17
ZNF607	124.963	-1.87386	2.05852e-17
FSIP2	65.9811	-2.52282	1.9623e-17
CENPJ	260.766	-1.33867	1.47874e-17
ATAD5	270.261	-1.28163	1.04916e-17
RBAK	404.969	-1.09976	9.37758e-18
LINC00705	216.085	-1.44757	7.90958e-18
ZNF788	46.1266	-3.00704	7.08746e-18
PCDH7	149.622	-1.72914	6.0485e-18
C4orf21	253.483	-1.418	5.08354e-18
PLVAP	64.6718	-2.63968	4.93487e-18
BVES	445.66	-1.02305	3.42341e-18
LRRK2	62.7322	-2.68228	3.39777e-18
ITGB4	464.455	-1.03333	3.31449e-18
LOC646719	367.82	-1.13528	2.86998e-18
TEX15	184.81	-1.59897	2.4981e-18
SYDE2	62.002	-2.76186	2.46263e-18
MGC16121	158.95	-1.71294	2.31217e-18
ABCA13	44.406	-3.15268	2.01124e-18
TIAM1	31.4329	-3.4604	1.95443e-18
RAD54B	237.317	-1.45274	1.69166e-18
GDF7	159.235	-1.75178	1.54509e-18
NEXN	286.738	-1.27473	1.4236e-18
GPX3	261.787	-1.35116	1.40618e-18
C14orf132	52.5551	-2.98298	1.2148e-18
LOC253039	140.498	-1.82376	1.20302e-18
SIM1	32.4313	-3.48764	9.85418e-19
TSPYL5	110.391	-2.11715	7.96453e-19
ZNF818P	135.407	-1.88594	7.87853e-19
CREB5	439.376	-1.04564	6.45879e-19
PDLIM3	94.8023	-2.24426	5.61345e-19
ZNF184	481.528	-1.02004	5.1678e-19
CDC14B	105.325	-2.13797	5.03732e-19
DTL	260.654	-1.39386	4.91982e-19
BDNF	194.524	-1.59565	4.23541e-19
TERC	463.124	-1.03351	2.11628e-19
ZNF569	263.201	-1.37457	1.30296e-19
ZNF850	425.855	-1.09141	1.26475e-19
ZSCAN18	180.805	-1.66146	1.18014e-19
LINC00641	215.626	-1.57911	1.13114e-19
PRKAA2	71.3179	-2.69892	1.00521e-19
ZFP30	424.57	-1.10801	9.95606e-20
POLQ	183.479	-1.68763	9.69698e-20
ZNF440	290.497	-1.36384	8.61785e-20
SKA3	186.857	-1.65245	6.46482e-20
ZNF616	351.971	-1.20094	6.03228e-20
XIRP2	51.2542	-3.1613	4.28936e-20
THAP9-AS1	490.967	-1.03112	3.39672e-20
ERCC6L2	458.646	-1.08742	3.33491e-20
MDM1	521.075	-1.00437	3.21972e-20
BMPR1B	163.142	-1.81352	2.34154e-20
ZNF566	305.522	-1.33615	2.28823e-20
MT1H	36.0374	-3.63982	1.26564e-20
PKHD1L1	390.547	-1.20966	1.20763e-20
MOCS1	166.563	-1.82008	1.20715e-20
TPD52	155.078	-1.86623	1.20317e-20
CEP135	348.345	-1.24607	1.17765e-20
ZNF367	85.4345	-2.55632	1.0685e-20
PCDHGA8	91.846	-2.48501	1.01377e-20
PLEK2	398.183	-1.16452	9.98438e-21
NEB	232.957	-1.53331	8.17405e-21
ZNF25	417.708	-1.18141	5.38789e-21
DTX3	166.724	-1.80891	4.81524e-21
TMEM170B	310.354	-1.33932	4.0313e-21
FANCM	461.225	-1.0987	2.954e-21
TIAM2	227.851	-1.57371	2.42485e-21
ZNF160	544.111	-1.0277	2.2265e-21
ZFP112	289.708	-1.38695	2.13095e-21
DIO2	74.2128	-2.80575	1.8261e-21
FUCA1	512.348	-1.05497	1.35234e-21
ZWINT	547.725	-1.01528	1.26138e-21
CEP97	528.077	-1.04358	1.02404e-21
C11orf82	268.633	-1.45426	8.78479e-22
MAK16	656.032	-1.01909	8.46606e-22
ANKRD32	464.403	-1.11949	7.58994e-22
KIF2C	264.198	-1.46797	5.21329e-22
HIST1H3F	327.5	-1.35587	5.05814e-22
ZNF879	119.624	-2.22412	4.02637e-22
ZBTB6	455.826	-1.1319	3.59918e-22
ZNF470	272.213	-1.47029	2.32863e-22
ADAMTS10	206.033	-1.68321	2.29249e-22
RNF182	214.732	-1.64995	2.24428e-22
ANO2	230.814	-1.59387	1.80472e-22
ZNF354A	318.956	-1.36117	1.43671e-22
SPIN4	147.943	-2.0236	1.33236e-22
NCAPH	196.537	-1.74617	1.22004e-22
A2M	366.263	-1.30343	1.15919e-22
ZNF600	203.587	-1.72887	1.15327e-22
ERCC6L	109.12	-2.36322	1.03722e-22
GCA	133.632	-2.20202	8.78037e-23
HIST1H3J	223.449	-1.63884	6.09531e-23
DIAPH3	274.631	-1.50452	5.52815e-23
HIST1H3G	191.314	-1.78273	5.32239e-23
BLM	247.907	-1.57745	4.67545e-23
CTSO	413.338	-1.25491	3.70508e-23
PCDH9	448.48	-1.1714	3.2966e-23
CADM1	88.93	-2.69544	3.04232e-23
HK2	388.527	-1.29295	2.51888e-23
FBXO25	127.13	-2.24604	2.36092e-23
ZNF766	493.998	-1.17035	1.81937e-23
MCM8	408.546	-1.26954	1.59016e-23
HAUS3	488.077	-1.12743	1.30275e-23
EPHB1	81.3365	-2.96208	1.10054e-23
PDE1C	118.612	-2.42687	1.07752e-23
RAD18	414.478	-1.26347	9.23783e-24
ZUFSP	580.933	-1.04831	8.46207e-24
PABPC4L	81.4745	-2.99933	8.09075e-24
CSGALNACT1	185.586	-1.84963	6.27725e-24
LMO7	444.812	-1.25001	5.73734e-24
ZNF738	426.819	-1.2137	5.11934e-24
ZNF248	444.939	-1.19157	5.10103e-24
ZNF594	190.113	-1.87414	4.0111e-24
ITGA8	92.1616	-2.71453	3.69743e-24
RAD51AP1	181.361	-1.93231	1.63609e-24
KIF4A	504.355	-1.15606	1.44126e-24
DBF4	357.103	-1.3507	1.42119e-24
MEST	354.569	-1.35523	1.02283e-24
KIF15	183.53	-1.95017	9.81434e-25
UTP14C	616.828	-1.06733	8.19617e-25
DNAJC2	515.629	-1.15274	7.12645e-25
LRRC16A	139.397	-2.32889	3.18303e-25
ZNF33A	662.346	-1.00542	3.08679e-25
FAM200B	653.793	-1.01948	3.03112e-25
OCLN	241.554	-1.70686	2.50813e-25
MR1	205.962	-1.86933	1.72609e-25
MBP	443.196	-1.24711	1.63245e-25
IQGAP3	502.745	-1.18057	1.36306e-25
EXO1	113.91	-2.52348	1.3068e-25
ZNF484	476.491	-1.20925	1.25137e-25
PCDHB2	88.0505	-2.93563	7.88839e-26
SLC41A2	600.605	-1.08131	6.6876e-26
ZNF175	556.512	-1.11404	5.67448e-26
MAD2L1	389.171	-1.37921	4.63817e-26
BRIP1	355.694	-1.41219	3.47395e-26
ZNF605	531.095	-1.14518	3.2624e-26
AK5	282.804	-1.59487	2.86696e-26
TRMT13	347.256	-1.44197	2.33441e-26
THAP2	378.277	-1.40453	1.99596e-26
SKA1	408.959	-1.31807	1.99169e-26
ZNF181	384.017	-1.37711	1.90072e-26
DSE	479.338	-1.22398	1.22068e-26
ZNF43	670.559	-1.05621	1.08552e-26
DPP4	371.074	-1.52347	1.05475e-26
ZNF845	553.608	-1.13905	7.26652e-27
TRMT5	675.283	-1.04322	6.98196e-27
MGARP	648.404	-1.06004	5.10408e-27
MIR216A	62.1074	-3.78754	3.2667e-27
WDR52	189.095	-2.02075	1.66386e-27
CCDC39	165.965	-2.15635	1.63853e-27
NEK2	136.942	-2.41343	1.47781e-27
TLR1	640.305	-1.0852	1.12447e-27
ZNF761	526.531	-1.22393	8.25259e-28
FAM76B	668.17	-1.09615	3.31774e-28
WHAMMP2	358.165	-1.471	2.67511e-28
DNAH14	137.048	-2.56795	2.46109e-28
AHI1	561.166	-1.16708	1.73802e-28
SPAG5	537.564	-1.20736	9.74229e-29
NRN1	86.8627	-3.44833	4.71806e-29
ZNF234	421.08	-1.3699	3.7538e-29
C9orf41	728.783	-1.0453	2.8688e-29
FILIP1	145.694	-2.49458	1.99638e-29
MLF1IP	268.881	-1.84137	1.99238e-29
MYBL1	139.988	-2.57365	1.87547e-29
ZNF252P	669.016	-1.11782	1.51548e-29
KIAA1009	671.592	-1.09674	7.91437e-30
CMAHP	99.6501	-3.06508	7.84782e-30
SNAPC1	671.391	-1.0971	6.62089e-30
ZNF92	562.262	-1.2116	5.99587e-30
WDHD1	525.041	-1.29596	3.92902e-30
ZNF480	538.107	-1.29865	1.70777e-30
ZNF320	520.338	-1.27819	1.50078e-30
TRNT1	590.821	-1.18712	1.35059e-30
ZNF507	700.196	-1.15178	1.34525e-30
BLZF1	682.065	-1.12079	1.27156e-30
ZNF347	155.746	-2.39667	9.62437e-31
MIPOL1	891.069	-1.01056	6.79238e-31
RRP15	601.248	-1.18662	3.07758e-31
RAPGEF4	370.25	-1.55297	2.29235e-31
ANP32E	806.765	-1.04772	2.21931e-31
ZNF91	784.08	-1.05092	1.8283e-31
UHRF1	417.862	-1.43959	1.64914e-31
ALKBH8	579.83	-1.22126	1.25908e-31
ZNF510	565.182	-1.23655	8.66588e-32
KIAA1430	765.934	-1.07565	7.79316e-32
CEP78	650.385	-1.2134	6.53633e-32
TAF1D	916.137	-1.04843	5.50574e-32
GABRE	380.108	-1.57186	5.23447e-32
RASAL3	106.967	-3.16053	5.04257e-32
RPAP3	932.123	-1.01315	4.24862e-32
MTX3	371.523	-1.58605	3.58954e-32
LTV1	517.401	-1.35063	1.96419e-32
ZNF354C	158.631	-2.50423	1.23231e-32
KIF16B	310.684	-1.70786	1.14861e-32
HNRNPU-AS1	234.657	-1.99019	1.13702e-32
CDC20	693.075	-1.17084	8.71806e-33
ZNF300	424.195	-1.50889	7.95807e-34
NDC80	357.1	-1.65836	5.38389e-34
KCNN3	246.143	-1.99982	3.17298e-34
CWF19L2	504.49	-1.37634	3.10959e-34
HCG11	342.353	-1.66801	3.01259e-34
POSTN	171.094	-2.45201	2.64546e-34
PPWD1	952.225	-1.00436	2.28518e-34
CLK4	450.977	-1.46036	1.53865e-34
ATAD2	724.126	-1.16015	1.46454e-34
PELI2	555.708	-1.31329	1.15731e-34
SNHG3	794.506	-1.10194	9.64757e-35
NCOA2	207.395	-2.23929	5.76123e-35
ART4	618.655	-1.29456	2.53797e-35
CCNE2	216.707	-2.21432	1.79284e-35
IL1R1	324.205	-1.78951	1.58204e-35
C1orf27	933.803	-1.07461	1.01601e-35
CASP8AP2	984.311	-1.02701	8.73493e-36
SHPRH	752.558	-1.14767	8.39246e-36
UBXN2B	252.53	-2.09214	4.27996e-36
DNM3OS	215.167	-2.23141	4.23733e-36
GOLGA8A	352.001	-1.71698	4.1841e-36
NUF2	199.701	-2.33275	3.81686e-36
OTUD6B	990.548	-1.02254	3.57001e-36
ZNF780A	539.773	-1.38926	2.20937e-36
KIF18A	233.032	-2.21276	7.07774e-37
HJURP	247.957	-2.1441	9.11228e-38
CCDC68	744.219	-1.19228	7.17205e-38
SETD5-AS1	486.429	-1.4756	6.09376e-38
ZNF12	849.482	-1.1165	5.08207e-38
YOD1	587.728	-1.37057	4.97257e-38
KIF21A	720.956	-1.23224	3.03762e-38
ENPP4	267.31	-2.04958	2.7949e-38
GPCPD1	809.14	-1.22857	2.51636e-38
FZD3	222.988	-2.27925	1.29309e-38
PDCD1LG2	804.309	-1.18385	9.13832e-39
FGF2	192.213	-2.58747	8.82315e-39
KRIT1	1008.27	-1.03821	7.86929e-39
KIF14	301.829	-1.98551	7.64511e-39
RAB23	816.786	-1.16896	6.27831e-39
AHSA2	772.596	-1.23633	5.02952e-39
FPGT	697.145	-1.34	3.96983e-39
MMD	482.843	-1.52786	3.02336e-39
GNA14	156.265	-2.90085	2.16449e-39
ZNF254	907.229	-1.12683	1.97923e-39
MPHOSPH10	813.899	-1.16922	1.89649e-39
ZNF678	701.929	-1.25726	1.85767e-39
FILIP1L	1188.11	-1.01951	1.20534e-39
ZNF121	547.391	-1.42653	1.1916e-39
TRIB2	845.522	-1.16989	9.36649e-40
KIF20A	1028.8	-1.04995	8.16898e-40
ANGPT1	257.579	-2.1529	5.57302e-40
UTP23	705.27	-1.27585	3.99101e-40
CNTRL	640.146	-1.32726	2.518e-40
FSTL5	234.521	-2.3023	2.37869e-40
CPE	291.308	-2.09918	1.38411e-40
MDFIC	1154.08	-1.01494	1.27504e-40
RIOK2	968.252	-1.10342	1.06431e-40
ZNF195	1107.48	-1.07255	8.54712e-41
C10orf118	1097.93	-1.02537	7.55169e-41
ESCO2	186.044	-2.69266	5.50789e-41
ZNF655	253.873	-2.2969	2.83458e-41
ZNF711	106.371	-4.1763	7.80609e-42
MCM10	187.499	-2.70176	7.39716e-42
UFL1	1269.64	-1.0107	6.13109e-42
NAA25	1156.13	-1.02133	3.82294e-42
WNK3	254.078	-2.23858	3.75226e-42
CKAP2L	170.146	-2.9091	3.74712e-42
SLC44A5	667.792	-1.39965	3.23933e-42
PDE5A	498.816	-1.57479	3.01641e-42
SNHG1	1105.96	-1.0812	2.48459e-42
ESF1	700.002	-1.3554	2.08335e-42
CD34	909.025	-1.16044	8.60288e-43
SAMD5	812.681	-1.22285	8.12835e-43
ZNF441	144.29	-3.30905	7.0198e-43
PDK4	164.854	-3.00961	2.26247e-43
CDCA2	420.082	-1.75511	1.34852e-43
FIGNL1	847.512	-1.22448	1.14069e-43
SULT1B1	857.54	-1.24503	6.00764e-44
ZNF780B	543.805	-1.57657	4.73403e-44
CCDC82	1007.65	-1.12505	2.36433e-44
PLK4	258.564	-2.3248	1.71858e-44
HMMR	751.48	-2.27896	9.82602e-45
GRB14	1296.82	-1.00236	8.76177e-45
BUB1B	364.662	-1.96383	7.6086e-45
SACM1L	1278.52	-1.00957	3.55048e-45
LRRC40	1295.49	-1.04397	1.231e-45
NOC3L	1204.26	-1.04628	6.84436e-46
ZNF37A	726.645	-1.34402	4.95862e-46
LIG4	770.036	-1.35995	3.39195e-46
G2E3	766.315	-1.32949	7.92726e-47
PPAT	904.569	-1.22154	5.4672e-47
RARB	1071.35	-1.13134	4.04126e-47
MIR3064	280.333	-2.29899	3.68022e-47
MT1G	110.902	-4.95653	3.1936e-47
LCORL	724.085	-1.36805	1.50841e-47
NXN	954.19	-1.21858	1.40546e-47
PBK	331.177	-2.09141	9.6624e-48
ZNF189	975.154	-1.18918	9.0278e-48
MATN2	576.363	-1.54549	7.71924e-48
RUFY2	1247.25	-1.07746	3.07506e-48
MTF2	1015.41	-1.16836	1.88564e-48
CLSPN	387.818	-1.95142	1.4815e-48
MIR17HG	303.032	-2.25617	8.7091e-49
RGS7BP	172.313	-3.29245	7.06696e-49
USP9Y	1097.36	-1.15298	6.49862e-49
CFI	270.543	-2.41926	2.71056e-49
IGF2R	1356.68	-1.03492	2.43896e-49
PRC1	815.727	-1.31947	1.60355e-49
SGOL2	479.111	-1.8255	3.89172e-50
PDE7B	443.662	-1.8472	3.32634e-50
NBEA	791.658	-1.38338	2.49573e-50
STC2	1074.15	-1.20442	3.49301e-51
BRCA1	568.832	-1.65639	2.97114e-51
TTK	338.092	-2.23329	2.10271e-51
CCDC132	1467.15	-1.0358	1.96167e-51
ANKRD36B	722.632	-1.44063	1.7856e-51
IL7R	596.874	-1.59019	1.74277e-51
UBLCP1	1203.29	-1.12957	4.73234e-52
ZNF302	595.421	-1.59732	3.70442e-52
PI16	812.612	-1.36783	2.01448e-52
ZNF449	741.575	-1.44022	2.00379e-52
EPS8	346.93	-2.18987	7.82823e-53
FAM196B	571.651	-1.71024	6.49868e-53
ZNF83	876.219	-1.32372	4.40119e-53
ZNF542	528.484	-1.71982	2.97204e-53
GEN1	688.02	-1.52902	9.38334e-54
TRMT10C	1090.93	-1.21071	8.64e-54
KIAA1524	499.502	-1.79403	7.08238e-54
MLH3	1275.22	-1.14998	2.53479e-54
NUSAP1	596.11	-1.64328	1.93482e-54
PPP1R3C	882.053	-1.35041	1.44077e-54
DNTTIP2	1141.69	-1.1911	9.83917e-55
SHCBP1	392.908	-2.07462	8.83195e-55
NEDD1	1509.71	-1.04285	5.70522e-55
SPDL1	543.157	-1.9114	2.07365e-55
GBP3	1335.9	-1.12073	1.51705e-55
FAM111B	170.103	-3.90979	1.30896e-55
DOPEY1	1132.1	-1.22408	7.9446e-56
NR1D2	1288.31	-1.17076	6.0903e-56
DNAJB14	1724.64	-1.00436	4.89712e-56
CDC6	432.364	-1.98539	4.57084e-56
FAM111A	1453.99	-1.06407	3.19488e-56
HIST1H3B	674.069	-1.62227	3.18168e-56
HIST1H1B	1002.16	-1.27744	2.24397e-56
ZNF260	1358.21	-1.12115	2.20849e-56
KIAA0020	1202.62	-1.20707	1.92414e-56
PPIG	1152.61	-1.21315	1.14229e-56
UGCG	1015.87	-1.27734	1.01422e-56
FTSJD1	1698.66	-1.03613	3.22382e-57
CENPC1	772.857	-1.5104	2.98094e-57
ZNF229	347.733	-2.31893	1.95441e-57
MAOA	458.196	-1.95032	1.9408e-57
ZCCHC6	1706.92	-1.0271	4.83405e-58
FABP4	1533.3	-1.06978	1.57537e-58
TRO	381.078	-2.25431	1.07615e-58
ZNF518A	1315.27	-1.20475	8.79776e-59
ABCA8	188.276	-3.69313	5.15789e-59
USPL1	1171.6	-1.23292	3.2512e-59
PCDH17	245.922	-2.97515	7.12885e-60
MYSM1	1225.87	-1.24879	2.17313e-60
SIKE1	1469.01	-1.13272	4.51889e-61
CHORDC1	1503.4	-1.16217	1.97069e-61
LRRC17	433.437	-2.11101	9.552e-62
BUB1	668.255	-1.66613	9.36955e-62
CLEC2B	924.963	-1.40094	6.88023e-62
MAP3K1	1408.41	-1.14306	3.79256e-62
PNMA2	239.693	-3.1434	3.44172e-62
PCDHGB4	313.379	-2.60674	8.46053e-63
PNN	1031.12	-1.36355	3.16574e-63
HMGA2	1911.14	-1.0047	2.16951e-63
RBM25	1569.78	-1.0955	2.06816e-63
BRCA2	620.585	-1.80068	8.90318e-64
SAMD9	1272.93	-1.22389	2.12244e-64
LINC00472	537.421	-1.95546	1.69234e-64
ABCA5	1782.35	-1.10308	9.86753e-65
ZNF704	942.541	-1.46605	1.38572e-65
TBC1D23	1901.36	-1.04551	8.38373e-66
TMF1	1837.3	-1.0463	4.13184e-66
JMY	996.055	-1.42209	5.88365e-67
SENP7	869.016	-1.53324	2.55336e-67
KIF20B	692.84	-1.79074	5.56673e-68
C1orf63	1354.78	-1.24194	2.89434e-68
POLK	1398.04	-1.23314	2.26301e-68
NRG1	2024.38	-1.04771	1.64808e-68
ABCA9	864.453	-1.54241	1.62259e-68
ECT2	1551.81	-1.1661	1.61939e-68
SEMA6D	343.878	-2.65961	1.11307e-68
MIR100HG	1050.54	-1.46369	7.8932e-70
CRISPLD1	246.181	-3.50875	6.02423e-70
THUMPD1	1948.81	-1.05351	3.04465e-70
ZNF702P	1478.94	-1.2807	2.1819e-70
MIR22HG	1666.02	-1.13021	1.19016e-70
SELP	477.473	-2.17421	4.87566e-71
C5orf42	2138.66	-1.06088	1.70884e-71
SMC3	1637.72	-1.19329	1.02374e-71
USP32P2	218.728	-4.40704	1.83747e-72
BNC1	228.535	-4.18842	7.1724e-73
CDH11	768.76	-1.70829	1.68197e-73
PDGFD	1937.93	-1.08133	5.35566e-74
TBK1	1918.91	-1.09602	1.08511e-74
RRM2	671.469	-1.88036	2.39194e-75
PAXBP1	1206.29	-1.38678	1.33508e-75
NOL8	1161.05	-1.41745	1.11512e-75
RPS6KB1	1571.29	-1.27131	7.0381e-76
PNRC2	2672.66	-1.03749	2.20453e-76
REV3L	2590.72	-1.01678	1.34461e-76
ARHGAP11A	516.793	-2.18366	1.13121e-76
DMD	517.653	-2.32847	4.37214e-77
CLOCK	1873.47	-1.13553	2.3428e-77
THOC2	1929.64	-1.15794	1.43013e-77
SKIV2L2	2469.94	-1.00243	1.08852e-77
ZZZ3	1894.49	-1.14424	8.5802e-78
ARID4B	1973.37	-1.10404	7.57767e-78
ITGA11	274.711	-3.50971	2.4375e-78
CCNA2	760.97	-1.86767	1.92938e-78
ZNF84	1467.46	-1.30797	1.40537e-78
GOPC	1803.54	-1.18605	1.3785e-78
ODF2L	2057.34	-1.17634	2.71075e-79
SMC4	1712.73	-1.20984	2.37799e-79
SOCS4	2127.46	-1.07412	5.60688e-80
SMC2	980.761	-1.58133	1.34734e-80
ZNF644	2272.76	-1.05924	1.05464e-80
CCNL2	2069.65	-1.1065	9.73177e-81
N4BP2L2	2366.49	-1.04555	1.13442e-81
ANKRD36	1487.33	-1.30562	1.05238e-81
NOP58	1305	-1.37964	6.91272e-82
SLTM	1743.48	-1.21741	3.96025e-82
DMXL2	860.985	-1.72136	3.80985e-83
KIF23	504.452	-2.34911	2.86697e-83
PRPF4B	2749.19	-1.03525	1.28185e-83
GIPC2	450.364	-2.53953	3.61671e-84
APPL1	2224.13	-1.08933	1.27361e-84
NOL11	2263.22	-1.0979	5.24321e-85
ZNF770	1974.26	-1.20973	4.57757e-86
CHST15	512.83	-2.38405	3.20899e-86
TXLNG2P	798.638	-1.86391	1.22564e-87
TRIP11	2342.49	-1.10732	1.14108e-87
RECQL	2672.39	-1.02828	1.03088e-88
LIMCH1	2055.52	-1.15983	6.71164e-89
NCAPG	630.685	-2.14648	1.90283e-89
CD2AP	2574.95	-1.05801	1.35804e-89
MAMDC2	879.675	-1.81011	1.35226e-90
CITED2	2520.61	-1.07238	1.31267e-90
RNF6	1709.23	-1.28053	1.07541e-90
KIAA1731	1349.47	-1.4786	2.19035e-91
CTNNAL1	2668.14	-1.07703	1.56237e-91
MKLN1	2237.72	-1.13937	5.0972e-92
SLC5A3	2279.16	-1.17407	1.36012e-92
CEP290	1367.55	-1.47931	4.19417e-93
KIF11	651.823	-2.2018	3.60461e-94
CCDC14	1249.46	-1.533	1.64871e-95
USP53	2212.94	-1.19036	1.5135e-97
TNFSF18	623.051	-2.3239	8.26249e-98
CDK1	815.976	-2.05643	7.68403e-98
CLK1	2358.87	-1.17268	2.00873e-98
KIAA1147	1959.82	-1.25319	3.00595e-99
TROVE2	2689.88	-1.12383	8.02646e-100
CEP350	3010.93	-1.03999	1.49443e-101
CHML	1468.12	-1.48613	1.09586e-101
NABP1	2151.67	-1.25052	7.70653e-104
NAA15	3035.39	-1.08335	1.37829e-104
TWISTNB	1499.11	-1.50475	2.98794e-105
ZNF518B	2485.39	-1.23751	6.66062e-107
TTC14	1932.83	-1.31468	3.82051e-107
PCGF5	2205.47	-1.25947	1.68415e-107
DIS3	2487.56	-1.23761	5.995e-108
SMARCAD1	3090.74	-1.13787	1.11211e-108
USP47	2787.2	-1.19258	1.29039e-109
FAM84B	1333.87	-1.64588	3.52044e-110
FLT4	832.315	-2.0834	2.0724e-110
IVNS1ABP	2325.99	-1.29496	3.42204e-111
BMP4	1633.81	-1.56204	3.56692e-112
FAR1	3643.93	-1.08792	3.01263e-112
FRAS1	686.85	-2.37367	2.57369e-112
VGLL3	607.634	-2.60463	7.68996e-113
DEPDC1	554.271	-2.7875	5.82851e-113
DLGAP5	782.908	-2.2551	7.43847e-115
SMC5	1456.04	-1.60501	7.69984e-116
RAB8B	3568.51	-1.13384	6.2498e-116
CHD1	2909.53	-1.26814	3.58274e-116
DSEL	1491.9	-1.56699	9.60062e-117
MMP10	1323.26	-1.67443	8.0366e-117
CRYBG3	2082.86	-1.39841	1.93154e-118
ZRANB2	2181.55	-1.34781	8.51878e-119
CDK6	3502.16	-1.13095	4.98271e-120
CASC5	544.752	-2.93746	1.38515e-120
LEPR	743.347	-2.41415	1.20695e-120
CREBZF	1974.47	-1.52505	7.95092e-121
SFTA1P	400.604	-4.37207	4.95278e-123
PRPF39	1149.75	-1.8663	4.65552e-123
RALGPS2	1193.03	-1.82498	1.68653e-123
CEBPZ	1815.35	-1.49066	6.38847e-125
NKTR	2226.56	-1.50112	7.46678e-126
ARSJ	2516.61	-1.28999	2.37515e-126
ZNF146	2476.87	-1.33585	1.04137e-126
SGMS2	2935.32	-1.1919	8.99494e-127
ACP5	895.412	-2.17647	5.525e-127
HMCN1	2091.53	-1.39598	2.25357e-127
RASSF8	3203.64	-1.14446	8.2341e-128
NEMF	1943.1	-1.45662	1.17746e-129
TIA1	4427.26	-1.10679	4.87661e-130
DICER1	3446.91	-1.20936	2.61889e-132
RNF144B	3991.02	-1.0731	2.07302e-132
SLC2A12	1061.04	-2.03573	6.82522e-133
CEP55	959.287	-2.22323	2.28934e-134
MIR5047	998.043	-2.16722	5.63951e-137
PDE4D	3709.96	-1.13773	2.49751e-138
MEG3	1565.3	-1.78873	2.39473e-139
SREK1	2562.57	-1.34787	9.76657e-142
GOLGA4	3622.73	-1.15446	3.46734e-143
BDP1	3219.36	-1.22612	2.26195e-145
PHIP	3233.48	-1.254	3.47369e-146
ZEB1	5170.35	-1.05071	5.47919e-149
BGN	1210.75	-2.12783	2.79502e-150
PNISR	1416.7	-1.89281	2.25752e-152
PIEZO2	3398.96	-1.2729	1.90498e-152
SRSF11	3672.52	-1.20348	1.19733e-152
MGP	3428.19	-1.23727	4.31076e-153
U2SURP	3717.33	-1.19701	5.98783e-156
DMTF1	1760.11	-1.72949	4.11638e-156
PLSCR4	2665.76	-1.42092	2.74248e-156
TBX18	1632.45	-1.79204	1.80309e-156
CCDC144B	534.534	-4.59569	3.5634e-158
DKK1	5477.35	-1.09357	1.83762e-161
ATRX	6434.2	-1.14613	1.58664e-163
BIRC2	5230.9	-1.08597	4.36911e-166
HERC2P2	2167.1	-1.6104	9.85997e-167
ERV3-1	4800.11	-1.11782	3.52979e-169
MYO1B	2463.28	-1.61471	1.84544e-169
TLR4	3982.23	-1.39087	3.82085e-170
ANGPT2	1680.21	-1.84299	3.16294e-172
RGS4	1266.57	-2.19087	3.2635e-173
MKI67	1115.29	-2.34344	1.58478e-173
SETX	7132.22	-1.01539	4.16887e-176
PCM1	6215.05	-1.06716	1.20036e-182
TBC1D4	5825.08	-1.07497	3.27085e-183
BCLAF1	5365.54	-1.24179	5.82288e-190
MPDZ	5639.39	-1.13055	1.90793e-190
PTAR1	4085.1	-1.27983	3.76588e-191
KIAA1324L	2948.43	-1.56347	1.53346e-192
RIF1	5045.43	-1.17328	5.12225e-193
AKAP9	4235.79	-1.38335	3.8008e-201
UACA	7889.02	-1.08387	1.62527e-203
ASPM	969.046	-3.25645	4.62955e-205
DDX21	5616.31	-1.22966	6.06905e-214
CENPF	1643.43	-2.24789	6.11711e-218
KIAA1033	8816.03	-1.06916	4.35119e-218
UAP1	4318.64	-1.34405	1.2615e-219
CENPE	972.973	-3.14466	6.88457e-221
PHLDB2	5021.56	-1.27341	1.8567e-225
NT5E	4652.3	-1.3272	7.44865e-227
DDX3Y	3092.62	-1.66156	6.61255e-236
NEK7	3636.81	-1.51374	1.26628e-238
APLN	10056.7	-1.08966	3.88156e-240
PHACTR2	8886	-1.08752	1.22687e-241
MTMR10	2427.81	-1.88583	3.358e-243
TGFB2	2162.98	-2.01248	8.47155e-244
ABCE1	6039.92	-1.28265	5.0978e-247
ALPK3	1619.05	-2.47735	9.70274e-249
HNRNPH1	6078.27	-1.26576	1.15241e-257
SMURF2	9347.63	-1.09975	1.8108e-259
ABCA6	7518.73	-1.21935	1.39559e-263
CEP170	10926.7	-1.10035	9.80666e-272
C15orf54	2567.4	-2.02608	4.07205e-274
WSB1	14992.7	-1.03474	1.45903e-279
ANLN	1642	-2.56313	3.98211e-280
TPR	5425.73	-1.39188	2.0469e-281
CTGF	14465.5	-1.01636	4.39348e-283
TTC37	7461.91	-1.25759	1.44284e-283
TNFSF4	6624.49	-1.29881	1.86849e-285
VPS13A	3443.95	-1.74649	8.61844e-293
GLCE	13768.6	-1.10104	3.56547e-293
TFEC	4390	-1.65217	2.76456e-299
THBS1	285216	-1.00435	0
MMRN1	96805.5	-1.72157	0
IL6ST	55036.7	-1.3963	0
VWF	47552.7	-1.66587	0
ANKRD1	30506.6	-2.05193	0
DST	21120.7	-1.54712	0
SF3B1	12080.8	-1.10651	0
CALD1	11468.4	-1.19575	0
KTN1	9617.17	-1.34744	0
SACS	9095.8	-1.48353	0
GPR126	8766.61	-1.48919	0
ZNF117	6532.28	-2.11758	0
ANKRD50	6494.51	-1.40592	0
EMCN	6220.37	-2.41267	0
ALDH1A1	6076.72	-3.35567	0
TNFSF15	5432.97	-2.40189	0
ADAMTS18	3633.37	-2.22479	0
CFH	2921.35	-3.39487	0
LUC7L3	2788.47	-2.12865	0
TOP2A	2191.92	-2.84207	0

## Sheet: 0_vs_30_min_7SKi_upnegulated
gene name	baseMean	log2FoldChange	pvalue
AQP10	11.8727	1.03172	0.0123117
TPPP3	20.1851	1.02071	0.00826018
SUCNR1	13.2928	1.09485	0.00732026
ITGB2	11.627	1.10589	0.00721018
KCNN1	14.3581	1.10295	0.00672741
TIGD3	16.521	1.09195	0.00603274
SIGLEC15	10.9309	1.13383	0.00596271
SALL2	26.0406	1.02201	0.00538204
FOS	40.7382	1.15419	0.00454881
SCNN1A	14.7313	1.16748	0.00388073
GADD45G	19.9292	1.12944	0.00368591
GGT3P	19.7721	1.19126	0.00221501
LOC100303749	32.9973	1.0648	0.0019749
LINC00035	28.6524	1.12405	0.00179768
TPTEP1	21.4424	1.20776	0.00163291
MAP6	28.8086	1.13687	0.0015599
SCARNA9L	41.2377	1.0284	0.00138566
RARRES3	30.1194	1.13051	0.00135679
SNX29P2	21.8831	1.22422	0.00131552
C1R	35.1884	1.09021	0.00123175
PDE6G	14.6175	1.31343	0.00119996
KCNN4	12.0565	1.3563	0.000978186
IGF1	42.3268	1.06125	0.000949668
CFLAR-AS1	117.681	1.16421	0.000939565
CD14	30.7568	1.17838	0.00092186
DGKG	40.1541	1.07524	0.000910016
CD207	14.1012	1.3658	0.000800609
SNORD116-14	49.4458	1.04583	0.000542015
EBF1	27.1315	1.2705	0.000496923
RBM24	39.6995	1.15254	0.00047894
EGOT	48.83	1.06014	0.000476216
C1S	31.2214	1.23071	0.000462227
IRF5	23.8706	1.33031	0.000443692
SNORD116-13	58.0604	1.00943	0.000402704
S100A3	32.9771	1.22743	0.000400395
FAM129C	24.1868	1.32772	0.000393241
CNIH3	42.6666	1.14907	0.000340738
CEND1	37.8381	1.20599	0.000327095
SLC6A16	61.1932	1.01039	0.000319843
DOK2	30.0893	1.28675	0.000286977
CYP2S1	46.7702	1.13575	0.000244447
RTN1	32.5072	1.30963	0.000209647
ZNF628	51.9346	1.10486	0.000208998
PCYT1B	12.704	1.53154	0.000197105
KCND1	52.297	1.13051	0.000186767
SNORA38B	71.3597	1.01932	0.000127863
GPIHBP1	29.0708	1.388	0.000116212
CITED4	84.0287	1.03562	7.9209e-05
ATP6V0D2	59.8665	1.11937	7.87225e-05
UNC5A	23.7603	1.51619	7.12361e-05
RIMS3	52.8364	1.23773	5.19754e-05
MT1X	68.5718	1.11262	4.27887e-05
SCN4B	40.6619	1.33883	4.1134e-05
CACNG8	78.6547	1.07604	3.31365e-05
LHPP	57.2579	1.22271	2.64146e-05
MPPED1	24.3507	1.59514	2.53927e-05
DHH	67.8309	1.15772	2.32576e-05
GCHFR	58.8477	1.22082	2.02677e-05
CHPF	59.6188	1.2351	1.85733e-05
FOXA1	25.7324	1.61153	1.74585e-05
UST	90.1425	1.05343	1.54548e-05
PPM1N	22.3439	1.6748	1.39851e-05
PRRT3	81.0907	1.10858	1.12411e-05
PRDM1	69.5452	1.2139	1.11366e-05
SLCO3A1	34.502	1.55435	9.90204e-06
SKAP1	45.0578	1.43563	6.97935e-06
ULBP1	76.6353	1.18813	6.94284e-06
PHLDA2	85.6674	1.11712	6.36331e-06
SYBU	78.0172	1.16381	5.94119e-06
RIPK3	118.326	1.01989	5.03173e-06
ANAPC15	103.309	1.05582	4.23299e-06
BCL3	82.0781	1.19326	3.37639e-06
ZSWIM2	11.7234	1.92117	3.30089e-06
TNF	10.6679	1.95438	2.14593e-06
TBX21	36.2392	1.63265	1.88923e-06
IL4I1	127.491	1.01849	1.44776e-06
BEST1	90.4092	1.19741	1.41922e-06
IGLL3P	22.4035	1.89451	1.3378e-06
DLG3	139.328	1.00001	1.10988e-06
SLC16A14	120.736	1.06667	7.97422e-07
EFNB3	59.4083	1.43098	7.90747e-07
ZNF467	91.2608	1.21977	7.30299e-07
GRID1	33.2092	1.75575	6.91402e-07
AFF2	66.0484	1.3954	5.91259e-07
RNFT2	41.3264	1.65773	5.83806e-07
SERPINI1	96.0739	1.18901	5.30643e-07
ICAM4	23.6102	1.96586	4.40721e-07
CA13	129.815	1.04645	4.20033e-07
SLC25A45	115.136	1.12974	2.85236e-07
SNRPN	35.9913	1.82093	2.23602e-07
PRRG2	118.42	1.13402	1.59114e-07
PLA2G3	15.944	2.14805	1.59001e-07
SNORA80B	82.3195	1.35383	1.34363e-07
PRR12	165.672	1.0098	1.27675e-07
PKP3	90.1306	1.31532	8.58364e-08
NAGS	151.217	1.06985	8.37191e-08
SLC8A1	131.565	1.11565	8.18471e-08
KLK6	46.1093	1.75677	5.46185e-08
EFCC1	44.6749	1.81753	5.3059e-08
PCDHA4	129.556	1.13504	5.20924e-08
WNT9A	152.341	1.06822	5.13391e-08
DHX58	111.91	1.2288	3.83332e-08
DUSP10	171.574	1.03464	3.55333e-08
MSX1	64.2853	1.59663	2.16877e-08
CCDC88B	96.3201	1.34295	2.06663e-08
SNORA71C	172.149	1.02933	2.01533e-08
CPS1	29.6958	2.0848	1.96314e-08
MACROD1	161.24	1.10311	1.23132e-08
ACOT1	154.43	1.15405	8.23284e-09
MEI1	71.5316	1.60132	7.34655e-09
NOVA2	139.079	1.18918	6.13937e-09
PTPRH	147.987	1.16984	5.30711e-09
C20orf24	245.477	1.01696	5.14069e-09
LOC388849	157.983	1.12766	5.09384e-09
RNU11	143.987	1.16452	4.82925e-09
SYNGR3	36.0271	2.10847	3.67037e-09
ZNF579	192.251	1.0323	3.0246e-09
FABP3	81.39	1.58101	2.78227e-09
LOC440896	17.7028	2.43436	2.63045e-09
PTK2B	129.909	1.25123	2.59315e-09
SKIDA1	73.1343	1.61379	2.41282e-09
CDCP1	145.462	1.19541	1.97791e-09
CA11	94.4771	1.48733	1.08699e-09
PRR7	138.48	1.26825	5.77505e-10
NUDT8	101.513	1.4825	4.87673e-10
RAB43	121.813	1.3683	4.57251e-10
NUPR1	71.3114	1.72228	4.20799e-10
PAOX	186.084	1.13082	2.50429e-10
SNORD22	126.856	1.37025	1.5342e-10
MIR612	255.976	1.02848	6.64133e-11
PLAC8	60.0059	1.97724	5.76565e-11
RSAD2	120.082	1.44529	4.20467e-11
TNFSF11	43.053	2.26919	2.81606e-11
CHCHD5	195.24	1.21394	2.34129e-11
NPRL3	273.542	1.02416	1.05873e-11
UCP2	79.8472	1.81098	8.82297e-12
SV2A	293.869	1.00545	4.33704e-12
PLEKHH3	299.723	1.04013	3.04527e-12
ARHGEF9	244.822	1.11248	1.95825e-12
CHCHD10	253.871	1.10875	1.53179e-12
GJA4	94.9151	1.75861	1.28243e-12
PCK2	300.074	1.04214	1.23482e-12
BATF2	108.004	1.65609	1.06775e-12
SULF1	150.665	2.48841	9.4394e-13
PELI3	246.035	1.12099	7.33574e-13
TBC1D17	189.045	1.27406	7.2719e-13
CENPV	279.072	1.08992	7.06307e-13
C10orf55	60.9273	2.16506	6.88571e-13
IQSEC2	232.449	1.17821	6.58135e-13
TNFSF9	248.231	1.11875	6.40604e-13
NLRC5	311.817	1.03051	5.71548e-13
OASL	135.007	1.51455	5.41729e-13
2009-03-01	140.721	1.50702	4.45505e-13
PER1	288.506	1.05386	4.34098e-13
ABCC3	172.847	1.35077	3.34127e-13
SNORD15B	263.306	1.1506	1.74589e-13
LOC100507156	164.297	1.41693	1.23774e-13
ACACB	130.755	1.5987	7.15636e-14
QPRT	43.8367	2.60601	7.07021e-14
GLI2	237.014	1.20461	6.08664e-14
C2CD4B	166.828	1.44626	5.49783e-14
HIF3A	101.037	1.84818	4.93588e-14
LOC286467	322.378	1.0581	4.86853e-14
CREG2	197.741	1.32475	4.5756e-14
SELENBP1	173.363	1.44805	1.37939e-14
ZMAT5	343.448	1.04211	9.5929e-15
GRAMD1B	253.279	1.21237	8.42035e-15
IL1A	170.852	1.48829	6.57617e-15
SORL1	143.518	1.60973	5.31075e-15
IFIT2	231.434	1.27117	5.04158e-15
EPSTI1	203.389	1.3802	3.78839e-15
LFNG	323.736	1.10296	2.19467e-15
IGFBP6	523.75	1.46395	1.99195e-15
HS3ST1	126.59	1.77377	1.65423e-15
NYAP1	182.616	1.52269	1.28585e-15
C7orf61	182.104	1.49251	1.01721e-15
ST6GALNAC1	117.71	1.83664	9.12522e-16
CA5B	352.36	1.06455	7.04648e-16
VLDLR	255.37	1.28266	4.72597e-16
SERGEF	283.574	1.20427	3.94396e-16
MSRA	300.837	1.17546	2.61022e-16
COMTD1	264.506	1.2666	2.4413e-16
PLEKHB1	70.0673	2.45297	1.20941e-16
IFITM1	105.558	2.00842	1.17286e-16
PICK1	414.526	1.03056	9.53173e-17
NUAK2	148.177	1.71357	8.24368e-17
SYT9	47.913	2.9335	6.46121e-17
D2HGDH	406.856	1.03965	4.12075e-17
STK32B	336.97	1.16558	4.10545e-17
TNNT1	112.913	1.97366	3.19674e-17
TMEM160	353.002	1.18902	2.88279e-17
DNER	340.592	1.14405	2.6524e-17
CMPK2	115.115	1.9811	1.58818e-17
SNORD49A	341.402	1.16168	9.16667e-18
PPM1H	267.491	1.32655	5.60844e-18
RNU12	224.583	1.46883	3.8859e-18
RINL	233.295	1.4719	3.45918e-18
IRF6	318.712	1.23147	3.25548e-18
CEBPD	289.359	2.44758	1.948e-18
SERINC2	386.926	1.15388	7.59126e-19
EPN3	190.25	1.6437	2.55578e-19
PTPLAD2	335.336	1.23627	1.54959e-19
YPEL3	445.972	1.07161	1.26688e-19
ZBTB16	108.568	2.35394	1.02747e-19
C2CD4A	112.773	2.21282	5.86795e-20
MYO5B	340.801	1.25429	5.05201e-20
UNC93B1	469.727	1.07464	2.54048e-20
SCN1B	394.196	1.20185	1.97733e-20
MAP2K6	498.429	1.05155	1.36962e-20
PRSS2	44.7824	3.54095	7.27096e-21
SCAF1	466.195	1.10511	4.60653e-21
PAPPA2	99.8927	2.42905	3.56235e-21
RAI2	423.415	1.15372	3.53857e-21
FBLN5	187.987	1.78908	1.24034e-21
F3	124.451	2.19739	9.72487e-22
DAK	587.367	1.00719	8.99423e-22
TNK2	500.422	1.16593	2.07562e-22
DRP2	149.443	2.158	2.06675e-22
CCDC178	366.659	1.27998	1.84584e-22
RGS14	221.402	1.75173	1.66295e-22
ZNF205	449.935	1.162	1.64435e-22
PDGFRL	448.488	1.16941	5.94966e-23
FAM173A	504.588	1.13593	3.77398e-23
KDM6B	332.74	1.37863	3.24837e-23
TOX2	313.834	1.42145	2.46448e-23
DDX19B	584.695	1.05746	1.86247e-23
LMCD1	380.52	1.30561	1.45495e-23
JOSD2	436.028	1.21138	1.03884e-23
FSD1	513.803	1.13765	8.77788e-24
TPGS1	463.638	1.21994	8.33958e-24
FER1L6	123.079	2.37292	7.2707e-24
HSD3B7	414.891	1.265	6.811e-24
SNORA57	551.92	1.09095	2.87786e-24
WDFY4	427.963	1.27028	1.8776e-24
REEP2	190.1	1.89597	1.69707e-24
ABCB9	538.747	1.12995	1.67731e-24
DHRS3	395.226	1.30906	1.13063e-24
NFATC1	571.589	1.08434	8.38391e-25
C19orf60	715.981	1.01192	7.47999e-25
RARG	379.43	1.43231	4.96352e-25
RNF122	387.83	1.39515	4.57424e-25
DYRK1B	523.581	1.18602	4.19407e-25
ALDOC	222.87	1.88681	1.79471e-25
SNORA71D	517.015	1.17865	1.53618e-25
SNORA68	544.67	1.13055	1.42748e-25
ESPN	113.966	2.61948	1.19895e-25
IL17D	639.52	1.04556	9.04461e-26
CDK2AP2	595.274	1.09946	8.64608e-26
RILPL2	512.222	1.19731	7.03917e-26
PTPN23	597.021	1.1225	3.98271e-26
ENO2	569.757	1.14214	2.20234e-26
TFPT	607.038	1.09325	1.94955e-26
TMEM204	615.54	1.08357	1.50596e-26
RTN2	421.343	1.32252	6.86114e-27
PCDHGC3	648.845	1.08073	2.92617e-27
BRE-AS1	101.674	2.93164	2.87625e-27
GSTZ1	610.959	1.13766	6.46868e-28
ECI1	599.138	1.14086	6.37885e-28
PYCARD	546.701	1.19991	5.74358e-28
NPTX1	127.22	2.61348	5.19897e-28
MME	685.241	1.07486	2.47756e-28
AIF1L	533.12	1.22796	1.58174e-28
PTRHD1	690.631	1.07758	6.85328e-29
RND1	115.984	2.84618	4.76435e-29
CCS	702.696	1.07725	4.27909e-29
STEAP3	816.848	1.00665	3.8936e-29
TM7SF2	260.182	1.80681	3.58855e-29
MVK	603.947	1.17138	2.9827e-29
CYTL1	192.76	2.14938	1.24678e-29
FKBP1B	635.86	1.19588	1.16481e-29
ITM2C	482.57	1.33439	7.68014e-30
CDKN2A	633.038	1.15848	6.64995e-30
HEY1	267.449	1.81975	5.80702e-30
TMEM256	668.51	1.17003	3.5041e-30
MLST8	634.251	1.15769	3.2742e-30
ACADS	567.695	1.22751	1.68206e-30
GALNT16	218.848	2.05402	1.42917e-30
ATP6V0C	758.063	1.0802	8.36262e-31
SLC16A9	103.829	3.26759	4.50759e-31
C11orf49	493.369	1.32823	3.96035e-31
NR1H3	294.869	1.75143	1.9295e-31
WDR54	653.488	1.20186	5.7818e-32
COL1A2	593.687	1.25297	2.71895e-32
SLC50A1	922.154	1.01864	2.5354e-32
IFIT3	454.233	1.44297	1.40667e-32
KIF26A	446.471	1.51419	8.38845e-33
MRPL53	768.161	1.1056	3.49405e-33
ETHE1	980.321	1.02497	7.13279e-34
IFITM2	757.418	1.1478	1.18741e-34
FAM102A	672.471	1.21917	1.10902e-34
ISG20	480.924	1.5203	8.24187e-35
SNTA1	607.806	1.41221	4.535e-35
ADIRF	552.214	1.35718	2.21775e-35
RNU6ATAC	365.812	1.6837	1.47184e-35
KRT15	923.192	1.05971	1.36896e-35
NDUFS7	990.298	1.12707	9.34972e-36
ATP6V0E2	797.364	1.16857	7.04222e-36
UNC5B	285.938	1.95652	6.08619e-36
SOX12	735.057	1.19868	6.04612e-36
CHST7	772.671	1.19069	1.28665e-36
TFF3	381.782	1.70245	3.47237e-37
ST3GAL4	874.025	1.10387	2.91609e-37
H2AFJ	930.151	1.12739	2.72859e-37
ZFPL1	985.097	1.04252	2.01358e-37
CCM2L	559.004	1.41764	4.24991e-38
MGRN1	1072.47	1.03511	1.83966e-38
PSMB10	951.823	1.1162	1.25554e-38
ANKRD13D	837.12	1.15963	1.05529e-38
IL6	330.747	1.92752	9.90313e-39
MX2	231.884	2.32141	7.83947e-39
WDR45	919.237	1.10617	5.92841e-39
CAPN5	1051.62	1.0518	1.50809e-39
SERPINB2	178.208	2.7986	1.1729e-39
LY6E	997.392	1.07447	6.79966e-40
APOL1	780.544	1.23693	4.28155e-40
APOBEC3G	545.955	1.53199	2.26623e-40
MZT2B	687.451	1.35122	1.80438e-40
EBP	868.874	1.18274	1.35015e-40
LINC00520	754.783	1.27704	8.90726e-41
ZC3H12A	312.903	2.07587	3.2866e-41
ACSS1	656.259	1.35394	2.2747e-41
PDLIM1	663.91	1.36074	1.85297e-41
TBC1D22A	1144.59	1.0301	1.82054e-41
CIC	667.574	1.35677	1.58973e-41
KRT19	1064.34	1.0676	1.27988e-41
FAM96B	1186.11	1.0116	5.63702e-42
LAYN	340.287	1.94686	5.27705e-42
PACS1	1170.62	1.03963	6.16169e-43
CELSR1	1112.78	1.06086	3.95581e-43
VAMP5	1317.41	1.00443	3.17327e-43
SLC27A1	876.486	1.19735	2.62055e-43
GBP4	163.917	3.24158	1.81542e-43
ATF3	203.902	2.7482	1.03305e-43
HIST4H4	1252.6	1.03582	2.08623e-44
PEX16	1039.94	1.12835	6.20088e-45
DGCR6L	1239.85	1.03571	4.13532e-45
BFSP1	712.943	1.41219	6.87086e-46
EFR3B	668.21	1.45493	5.48182e-46
NTHL1	889.68	1.25468	6.08808e-47
MRPL23	1025.19	1.22419	3.26914e-47
LAMA5	1225.14	1.09411	1.77621e-47
TGFB1	1198.06	1.13358	8.75839e-48
C11orf80	1166.64	1.11384	7.17238e-48
ORAI3	1205.43	1.10331	4.16227e-48
SCARB1	1289.4	1.09901	2.4696e-48
DUSP5	676.834	1.47434	2.13754e-48
SELM	1240.46	1.08891	1.92205e-48
PITPNM1	1138.33	1.13453	1.27278e-48
PLCD3	1778.29	1.01895	7.35795e-49
CHMP2A	1292	1.06562	2.31289e-49
GGT1	682.825	1.49398	1.62667e-49
PRSS3	966.787	1.23006	1.09001e-49
C12orf57	1338.51	1.07188	2.76869e-50
RNPEPL1	1261.52	1.10525	3.04856e-51
TSSC1	1439.21	1.05166	2.0599e-51
CCL20	165.826	4.01156	4.77186e-52
AACS	1395.12	1.09568	1.75767e-52
SPINK2	396.358	2.10852	9.72234e-53
LPXN	686.697	1.52418	4.3821e-53
CARD11	1607.4	1.02288	3.43809e-53
VAT1L	210.132	3.20758	3.43544e-53
CRYL1	1301.49	1.1204	1.44968e-54
LTBP3	1362.91	1.14768	9.34496e-55
OAS3	1477.08	1.10128	8.43086e-55
HSPA12B	1481.12	1.08131	9.17812e-56
UBXN6	1737.17	1.04128	7.59888e-56
HCFC1R1	771.159	1.48205	5.99099e-56
PQLC1	1837.94	1.02288	5.371e-56
MMAB	643.161	1.65688	4.9348e-57
ITGAX	313.463	2.56861	3.48232e-58
CSF2	175.549	5.1404	5.50974e-59
LAMTOR4	1857.34	1.03593	2.39332e-59
BBC3	1013.35	1.32946	2.05608e-59
HSD17B14	957.359	1.38428	3.75464e-60
BST2	1057.4	1.32018	2.35443e-60
RASGRF2	1247.92	1.21125	7.06384e-61
PLA2G16	1343.4	1.18178	1.33272e-61
BANF1	1352.6	1.22046	9.1081e-62
MRPL11	1589.89	1.13915	2.56294e-62
NCOR2	1254.46	1.23615	1.93809e-62
GSTP1	20584.7	1.30123	7.15937e-63
TRAPPC2L	1427.98	1.18145	2.11583e-63
MZT2A	1445.35	1.19215	1.33942e-63
SPNS1	1717.7	1.15134	9.50556e-65
OCIAD2	1791.14	1.08953	9.09559e-66
MT1E	1700.18	1.13743	6.42926e-66
SNCG	1275.05	1.35117	4.53081e-66
CCDC69	1907.16	1.04453	2.48426e-66
N4BP3	1655.76	1.21671	1.31012e-66
USP54	1734.76	1.08996	8.25488e-67
LOC100130476	217.128	4.62234	1.19255e-67
PSMB8	1316.46	1.25682	9.92484e-68
BCHE	289.306	3.21456	4.34058e-68
PRKCDBP	6042.11	1.38708	1.43869e-68
DTD1	1936.2	1.05927	1.33099e-68
TSC22D4	1944.35	1.04689	9.62273e-69
ABCA3	1350.96	1.33323	3.28262e-69
FDXR	2131.85	1.0595	2.97054e-69
PTPRS	1999.9	1.07878	1.1233e-69
NDUFS8	2030.62	1.08888	4.06938e-70
NDUFB10	1936.65	1.09438	1.39172e-70
EHBP1L1	1872.77	1.08438	7.79512e-71
CSTB	2169.96	1.01992	3.2558e-71
CYSTM1	2186.87	1.0283	3.30423e-72
WDR13	2186.67	1.05499	4.77551e-73
ARHGAP28	1924.32	1.11974	5.35567e-74
CXCR7	1632.62	1.20236	2.05462e-74
SAMSN1	1148.68	1.42621	1.52918e-75
SNORA70	2628.73	1.05498	7.88566e-76
H1FX	1092.55	1.51728	2.66398e-76
CDIP1	1790.47	1.15439	2.03752e-76
EXOC3L1	1295.69	1.36915	1.1592e-76
SPECC1	1421.39	1.32333	3.16075e-78
ACOT7	1463.95	1.30649	1.92367e-78
TP53I11	2217.64	1.11297	1.40718e-78
AIP	1464.49	1.35458	1.2448e-79
IFI35	990.219	1.59925	3.51698e-80
STC1	2186.54	1.07982	2.05928e-80
DBI	2271.36	1.07471	2.85115e-81
AMDHD2	1617.97	1.32884	2.77777e-81
BHLHE40	2029.1	1.14558	2.52229e-83
GPX1	14946.6	1.04894	1.45265e-83
PGF	12449.7	1.32106	5.66264e-84
NAPRT1	1773.45	1.23907	5.25782e-84
TMEM173	2680.96	1.09548	3.8284e-84
PMAIP1	2152.1	1.17618	3.2115e-84
BRMS1	2444.93	1.05625	2.78733e-84
UBE2L6	1380.02	1.46288	1.89195e-84
CCDC85B	4247.75	1.77674	1.08038e-84
DDIT4	2738.67	1.02722	1.01738e-84
PARP10	1408.72	1.38428	5.64794e-85
PPP4C	2688.61	1.02304	1.3763e-85
CD82	1484.55	1.35608	4.0236e-86
IGFBP2	12387.5	1.36395	3.37835e-86
BLVRB	1640.15	1.3388	2.35702e-86
HLX	897.228	1.81855	1.03013e-86
SPTBN2	1584.39	1.31786	9.62083e-87
ACAT2	1025.33	1.66966	4.30509e-89
MYL6B	2224.33	1.16258	2.65312e-90
VEGFB	1170.49	1.62444	1.15643e-90
ROMO1	2272.44	1.15906	8.64567e-91
FLOT1	3161.35	1.01996	2.33382e-91
TXNL4A	2575.77	1.17941	9.73901e-94
CLCN7	2800.09	1.07776	5.73656e-94
CD68	1576.28	1.45457	9.33655e-95
EHD2	3144.32	1.01382	3.93688e-95
POLD4	2262.94	1.21043	3.07809e-96
PEPD	2844.55	1.13987	8.53239e-97
TRMT112	3360.7	1.05293	8.49e-97
FNDC4	2759.51	1.11956	2.11118e-97
G6PD	2066.18	1.2384	1.26457e-97
GLTSCR2	2650.01	1.20791	6.60659e-98
TRIB3	2448.83	1.18654	2.87354e-99
MPG	2045.68	1.27723	1.21502e-99
PSME1	2489.64	1.15515	4.57403e-100
UBXN1	2686.5	1.13214	1.53468e-101
MAP2	2536.71	1.1523	4.15375e-102
CHST1	740.246	2.22581	3.68747e-103
CTNNBIP1	2847.66	1.09285	3.058e-103
HS1BP3	2581.03	1.15799	1.26487e-106
LRP1	1113.98	1.77653	7.56662e-107
VAC14	2329.22	1.22979	3.5917e-108
NIPSNAP1	3262.84	1.06322	2.31311e-108
IRF1	686.554	2.42479	1.13063e-108
ARL6IP4	4323.4	1.01934	7.4476e-109
ECM1	851.604	2.09221	6.8763e-109
C11orf31	2990.25	1.14305	2.84917e-110
COX5B	4131.11	1.00175	8.21898e-111
CD69	433.599	3.70607	3.5793e-111
MVD	1328.25	1.72486	1.02705e-113
SLC25A1	2761.38	1.2686	7.09507e-114
TCEB2	3106.8	1.21447	5.99351e-116
DRAP1	2522.22	1.24853	3.56823e-116
CRIP2	4448.17	1.00758	3.53941e-118
FIBP	2591.72	1.24936	3.29091e-119
CXCL3	488.613	5.71542	3.29991e-121
MGST3	4292.09	1.00891	1.29827e-121
RPS16	3161.83	1.17318	5.3977e-122
NDUFV1	4106.99	1.03547	3.56775e-124
S100A13	3098.52	1.19705	1.03009e-124
CCNA1	3173.92	1.20059	8.57422e-130
HELZ2	2368.87	1.4471	5.58485e-130
OAS1	1978.95	1.48765	3.49237e-131
ATG13	3908.45	1.11058	4.58019e-133
RPS2	39609.4	1.10129	1.03422e-133
DHCR24	3995.81	1.08407	5.03501e-134
DHCR7	2202.92	1.48244	4.93434e-139
ATP6V0D1	4290.88	1.07956	3.35229e-139
ZFP36	521.266	4.65485	3.97724e-140
ADAMTS4	2236.46	1.5664	9.8176e-142
ITPRIP	3032.14	1.26557	6.98013e-143
NADSYN1	5399.76	1.03426	9.65144e-145
VPS51	4117.25	1.20517	5.20439e-145
DDB2	2906.7	1.3042	1.15442e-146
SREBF1	1319.02	1.98597	2.71537e-147
ARAP1	4351.58	1.11773	1.15e-147
OAS2	2413.34	1.47741	4.8912e-152
CNDP2	4404.7	1.11513	2.50843e-153
EFNB1	3169.37	1.29972	1.62597e-154
RASSF2	4765.48	1.10437	8.64128e-157
AFAP1L1	5854.84	1.01694	4.89715e-161
PLTP	5924.2	1.0647	1.67118e-161
TGFBI	5381.83	1.06527	1.45521e-161
NFKBIZ	1186.93	2.26713	6.91679e-164
CSRNP1	1635.98	1.89607	2.63221e-164
GPR143	3124.22	1.42417	2.25897e-166
TRIB1	2531.56	1.50696	8.61766e-167
PSMD13	6648.66	1.0127	1.01173e-169
IFIT1	1239.12	2.28778	4.29753e-170
SREBF2	2374.48	1.58667	2.81525e-170
RPLP1	7024.24	1.11366	7.06398e-172
MAFF	3606.71	1.37266	1.05638e-172
IRAK1	5796.79	1.11033	4.47301e-174
INSIG1	3516.31	1.32944	1.26116e-174
CAPG	3618.31	1.3236	5.51296e-175
NEAT1	4065.01	1.28663	7.29384e-177
FADS1	4535.02	1.19823	1.40952e-177
FDPS	5982.99	1.08685	1.24926e-178
CDK4	6562.27	1.02618	3.54197e-180
SOX17	2090.55	1.86381	1.63864e-181
RPS21	7286.45	1.02094	1.53822e-190
RAB1B	7930.16	1.01917	4.23356e-191
HOMER3	6290.27	1.22582	1.58285e-191
PIM3	5180.3	1.27567	3.39556e-197
TMEM35	2866.46	1.73421	4.41357e-208
PLEC	13093.1	1.0008	1.62153e-208
COX4I1	8124.56	1.07005	9.27858e-217
ACE	2794.23	1.68267	1.77243e-220
PREX1	9138.26	1.04489	4.10839e-221
EEF1D	10893.9	1.02345	2.6243e-227
AGRN	4804.42	1.53115	1.06114e-227
SPATA20	4604.2	1.35625	6.89431e-230
PPP1R15A	3163.17	1.69161	1.27443e-235
FASN	3430.92	1.6152	1.90516e-242
CDH6	1003.89	5.02704	1.68372e-243
ISG15	3007.12	1.82582	6.17216e-244
PRDX5	7458.11	1.23936	5.03368e-245
FAU	6964.47	1.26066	5.00395e-250
ARPC1B	10890.7	1.19718	3.02191e-253
CORO1B	5991.99	1.45201	5.3399e-255
ABCG1	2245.4	2.10384	9.69066e-258
IER3	3600.69	1.65302	3.64724e-267
FDFT1	5868.95	1.37643	7.65267e-270
LSS	6627.75	1.35438	2.45121e-270
CAPN1	8250.07	1.23738	6.76681e-278
TKT	10061.6	1.24621	3.99042e-295
MDK	11619.8	1.13899	6.68464e-296
GLT25D1	16056.7	1.09437	8.66221e-297
ALDOA	16326.6	1.13865	4.64118e-298
HSPG2	91975.9	1.84586	0
TMSB10	53145.6	1.03904	0
FTL	52803.6	1.0489	0
RPS3	46466.3	1.10409	0
CFL1	42152.6	1.05666	0
PKM	39522.6	1.00109	0
FTH1	32045.7	1.20409	0
CD63	30368.2	1.00677	0
S100A6	30038.2	1.45134	0
IFI27	21110.6	1.64831	0
CD9	19907.7	1.0634	0
SCD	13604.3	1.92567	0
CDKN1A	12505.4	1.18275	0
PPP1R16B	12164.2	1.51793	0
CLDN5	9254.84	1.82441	0
TCN2	8553.53	1.354	0
FADS2	8078.28	2.05728	0
NFKBIA	7927.78	3.45031	0
APOLD1	6011.3	2.14226	0
IGFBP5	5829.86	2.16893	0
LIPG	5814.15	1.55198	0
GDF15	5573.26	1.85321	0
IL8	5261.01	3.84342	0
DUSP1	4403.65	1.81293	0
PTGS2	4192.59	2.63434	0
MX1	3934.13	2.16281	0
IFI6	3894.42	2.08116	0
C8orf4	3345.33	2.00116	0
SELE	2664.14	4.61508	0
CXCL1	2142.57	2.96115	0
EEF1A2	2085.34	3.24028	0
CXCL2	1970.47	5.89594	0
TNFAIP3	1899.51	3.64963	0
JUNB	1849.61	3.11069	0
